# Supplementary material for: Maternal Obesity Induces the Meiotic Defects and Epigenetic Alterations During Fetal Oocyte Development
Source: PubMed Central journal article supplement (PMC11321662; doi:10.1002/advs.202309184), 2024-06-13
Supplement: ADVS-11-2309184-s001.pdf [file ADVS-11-2309184-s001.pdf]

## Supporting Information

for *Adv. Sci.*, DOI 10.1002/adv.202309184

Maternal Obesity Induces the Meiotic Defects and Epigenetic Alterations During Fetal Oocyte Development

*Shoubin Tang, Huihua Wu, Qiuzhen Chen, Tao Tang, Jiashuo Li, Huiqing An, Shuai Zhu, Longsen Han, Hongzheng Sun, Juan Ge, Xu Qian, Xi Wang\* and Qiang Wang\**

## **Maternal Obesity Induces the Meiotic Defects and Epigenetic Alterations during Fetal Oocyte Development**

Shoubin Tang<sup>1, 3, 4</sup>, Huihua Wu<sup>2, 4</sup>, Qiuzhen Chen<sup>1, 4</sup>, Tao Tang<sup>1, 4</sup>, Jiashuo Li<sup>1</sup>, Huiqing An<sup>1</sup>, Shuai Zhu<sup>1</sup>, Longsen Han<sup>1</sup>, Hongzheng Sun<sup>1</sup>, Juan Ge<sup>1</sup>, Xu Qian<sup>3</sup>, Xi Wang<sup>1\*</sup>, and Qiang Wang<sup>1,5\*</sup>

1 State Key Laboratory of Reproductive Medicine and Offspring Health, Changzhou Maternity and Child Health Care Hospital, Changzhou Medical Center, Nanjing Medical University, Nanjing, 211166, China

2 Suzhou Municipal Hospital, Nanjing Medical University, Nanjing 211166, China

3 Department of Nutrition and Food Hygiene, School of Public Health, Nanjing Medical University, Nanjing, 211166, China

4 These authors contributed equally

5 Lead contact

\*Correspondence should be addressed to:

Qiang Wang, Ph.D., Professor, Nanjing Medical University, 101 Longmian Rd, Nanjing, Jiangsu, 211166 China

E-mail: [qwang2012@njmu.edu.cn](mailto:qwang2012@njmu.edu.cn), Phone: +86-25-86869511; Fax: +86-25-86869511;

OR

Xi Wang, Ph.D., E-mail: [xiwang@njmu.edu.cn](mailto:xiwang@njmu.edu.cn).

## Table of contents

|                           |            |
|---------------------------|------------|
| <b>Supporting figures</b> | <b>3</b>   |
| <b>Table S1</b>           | <b>14</b>  |
| <b>Table S2</b>           | <b>46</b>  |
| <b>Table S3</b>           | <b>47</b>  |
| <b>Table S4</b>           | <b>48</b>  |
| <b>Table S5</b>           | <b>101</b> |

## Supporting figures

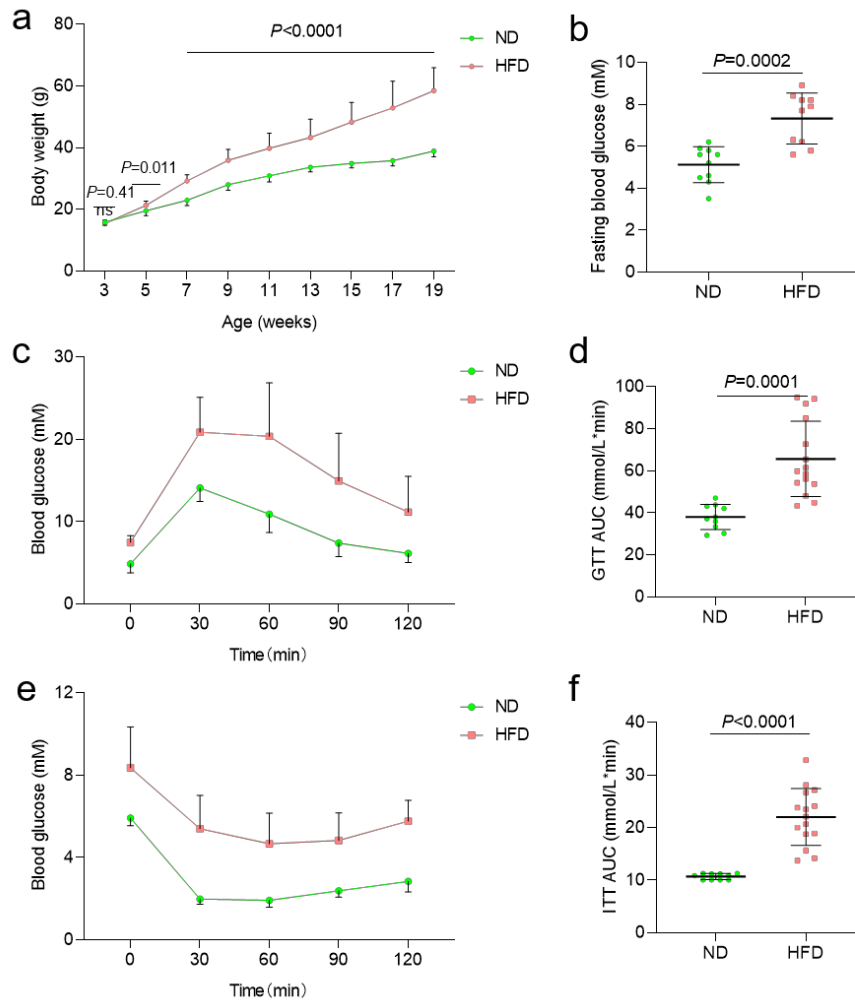

**Figure S1. High-Fat diet induces obesity, glucose intolerance, and insulin resistance in female mice.** Female mice were subjected to either a normal diet (ND) or a high-fat diet (HFD) for a duration of 16 weeks. The following parameters were assessed: **a**, Body weight of the mice ( $n = 10$  for ND mice;  $n = 12$  for HFD mice). **b**, Blood glucose levels after an 8-hour fasting period ( $n = 10$  for ND mice;  $n = 10$  for HFD mice). **c**, **d**, Blood glucose levels during the glucose tolerance test (GTT) and calculation of areas under the curve (AUC) ( $n = 10$  for ND mice;  $n = 15$  for HFD mice). **e**, **f**, Blood glucose levels during the insulin tolerance test (ITT) and calculation of areas under the curve (AUC) ( $n = 10$  for ND mice;  $n = 15$  for HFD mice). Data are presented as mean  $\pm$  SD. Statistical analysis was performed using a two-tailed Student's *t*-test. Significance was set at *P*-value  $<0.05$ .

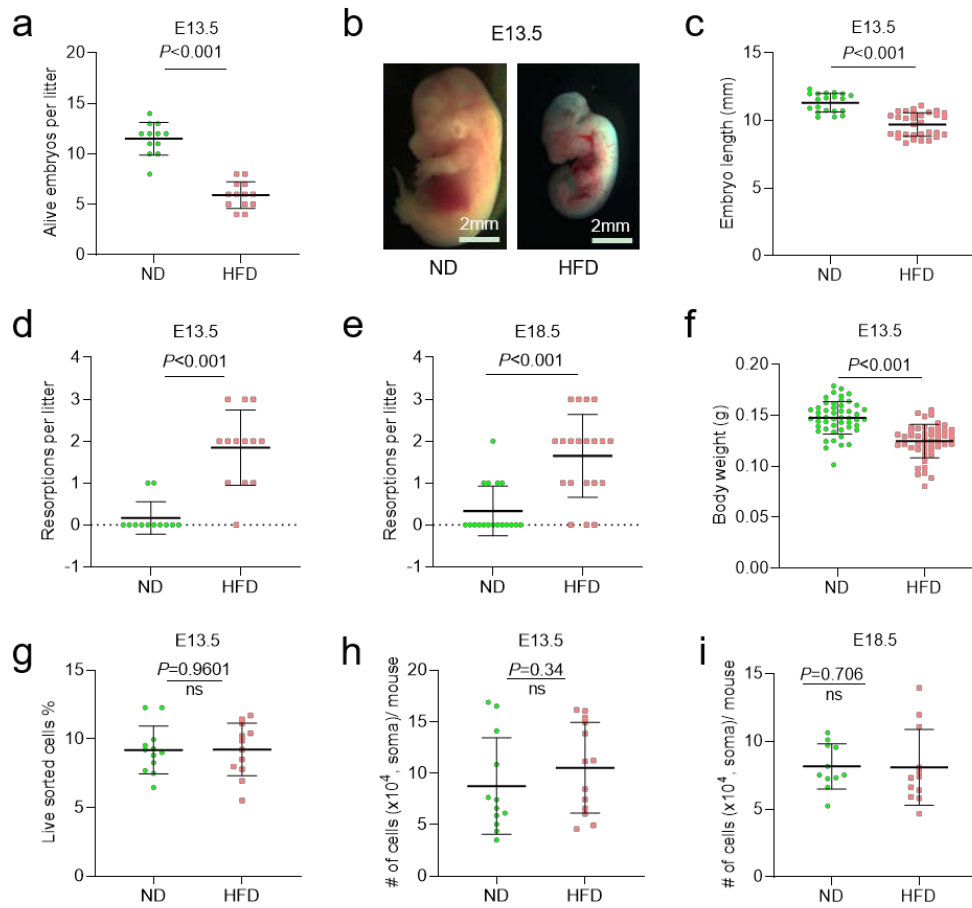

**Figure S2. Maternal obesity impairs fetal development** **a**, Fetal development was assessed by measuring the number of alive fetuses (**a**, ND = 12 and HFD = 13 litters at E13.5), crown–rump length (**b, c**, n = 20 for ND and n = 31 for HFD) in live embryos. **d**, **e**, Maternal obesity influences the resorption rate at E13.5 (n = 12 for ND and n = 13 for HFD) and at E18.5 (n = 18 for ND and n = 20 for HFD). **f**, Maternal obesity affects the body weight of fetuses at E13.5 (n = 50 for ND and n = 49 for HFD). **g**, Statistical analysis of the number of SSEA-1<sup>+</sup> oocytes in each fetus at E13.5 (n = 12 for ND and n = 12 for HFD). **h, i**, Maternal obesity does not affect the average somatic cell number. At E13.5: n = 12 ND and n = 13 HFD biological replicates, at E18.5: n = 11 ND and n = 12 HFD biological replicates. Data are presented as mean  $\pm$  SD. Statistical analysis was performed using a two-tailed Student's *t*-test. Significance was set at *P*-value  $< 0.05$ .

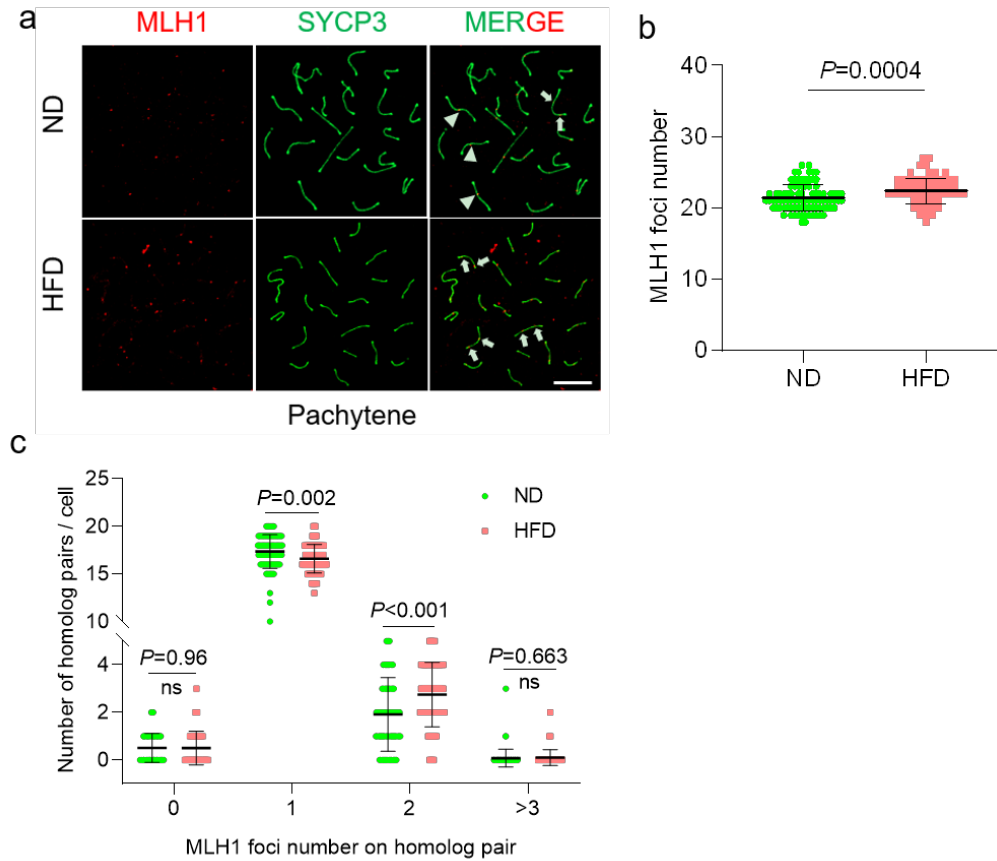

**Figure S3. Obesity induces aberrant meiotic crossover formation in fetal oocytes. a,** Chromosome spreads of fetal oocytes from E18.5 ND and HFD mice were immunostained for SYCP3 (green) and MLH1 (red) at the pachytene stage. While arrowheads indicate a single MLH1 signal on a homologous pair, arrows indicate multiple MLH1 signals on a homologous pair. **b,** Quantification of MLH1 foci number per cell at the pachytene stages. **c,** Distribution of MLH1 foci at different homologous pairs in ND and HFD fetal oocytes ( $n = 91$  oocytes for ND and  $n = 90$  oocytes for HFD, for each group, three mice were analyzed). Data are presented as means  $\pm$  SD. Statistical analysis was performed using a two-tailed Student's *t*-test. Significance was set at  $P$ -value  $<0.05$ . "n.s." indicating no statistical significance.

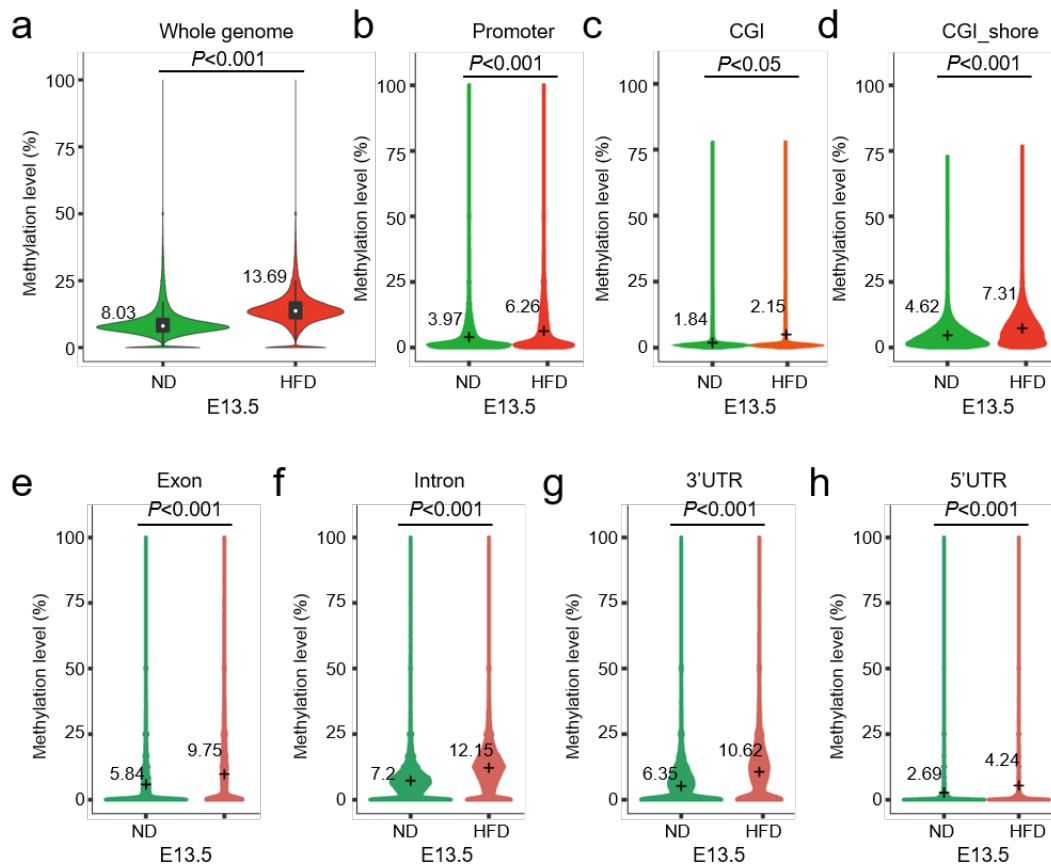

**Figure S4. Global DNA hypermethylation across different genomic features in HFD fetal oocytes.** **a**, Average methylation levels in the genome of fetal oocytes at E13.5. **b-h**, Violin plots displaying methylation levels for different genomic features, including promoters (**b**), CGI (**c**), CGI shore (**d**), exon (**e**), intron (**f**), 3'UTR (**g**) and 5'UTR (**h**) in E13.5 fetal oocytes. The mean methylation levels are denoted by numerical values and black crosses. Statistical analyses were conducted using a bootstrap test.

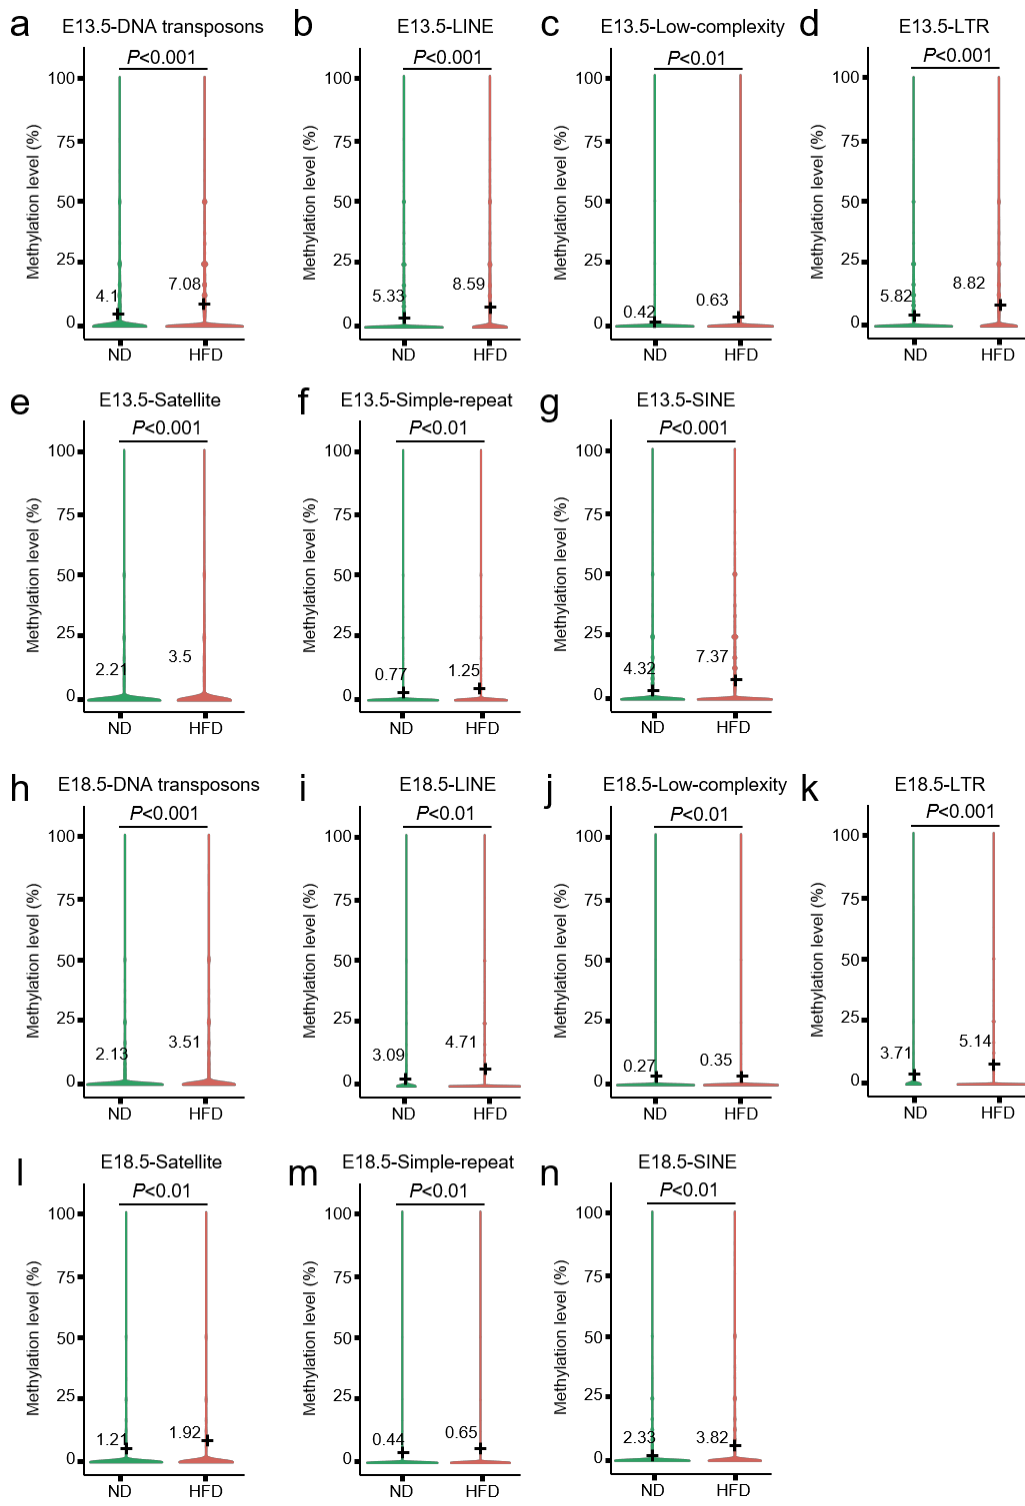

**Figure S5. Global DNA hypermethylation across different repetitive elements in oocytes from HFD fetuses.** Violin plots illustrating the methylation levels of major repetitive elements in fetal oocytes from ND and HFD mice at E13.5 (a-g) and E18.5 (h-n), respectively. Mean methylation levels are indicated by the numerical value and a black cross. Statistical analyses were performed using a bootstrap test.



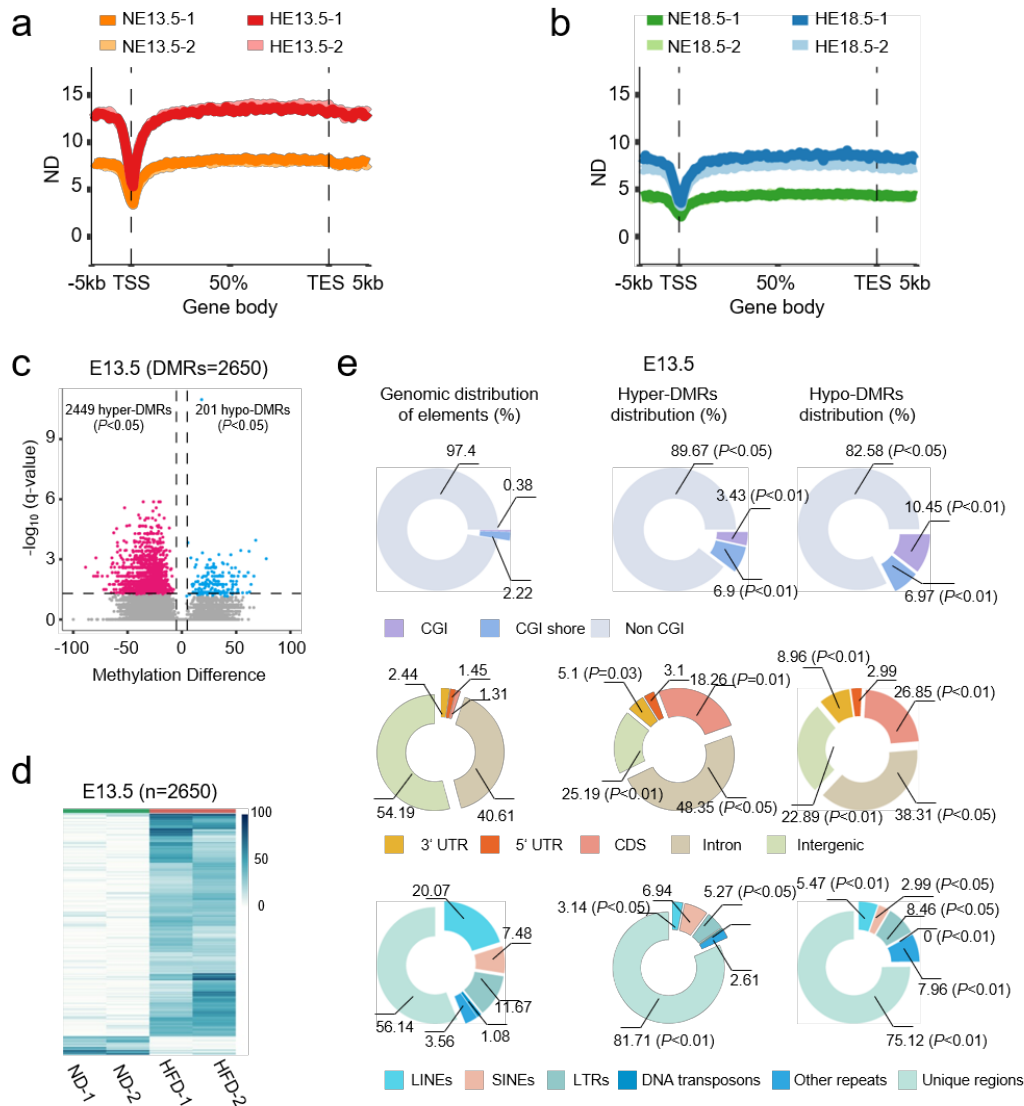

**Figure S6. DNA methylation aberrations in fetal oocytes.** **a, b,** Average DNA methylation levels (CpG sites) along gene bodies, 5 kb upstream of transcription start sites (TSSs), and 5 kb downstream of transcription end sites (TES) of all RefSeq genes across different samples. **c,** Volcano plot depicting the results of DNA methylation microarray analysis in fetal oocytes from ND and HFD backgrounds at E13.5. Dots positioned in the upper left corner represent significantly hypermethylated probes, while those in the upper right corner represent significantly hypomethylated probes with a statistical significance of  $P < 0.05$  and a fold change  $>1.5$ . **d,** Heatmap visualization illustrating DMRs in ND and HFD fetal oocytes at E13.5, where each line represents a distinct DMR. High methylation levels are denoted in blue, while low methylation levels are depicted in white. **e,** The relative proportion of DMRs among

CpG Islands (CGIs) and CGI shores (top), the relative proportion of DMRs among coding and noncoding regions (middle), and the relative proportion of DMRs among distinct sequence and repetitive elements throughout the genome (bottom). Fisher's exact test was employed to assess potential enrichment or depletion of DMRs relative to the genomic distribution of these elements: significance was set at P-value <0.05.

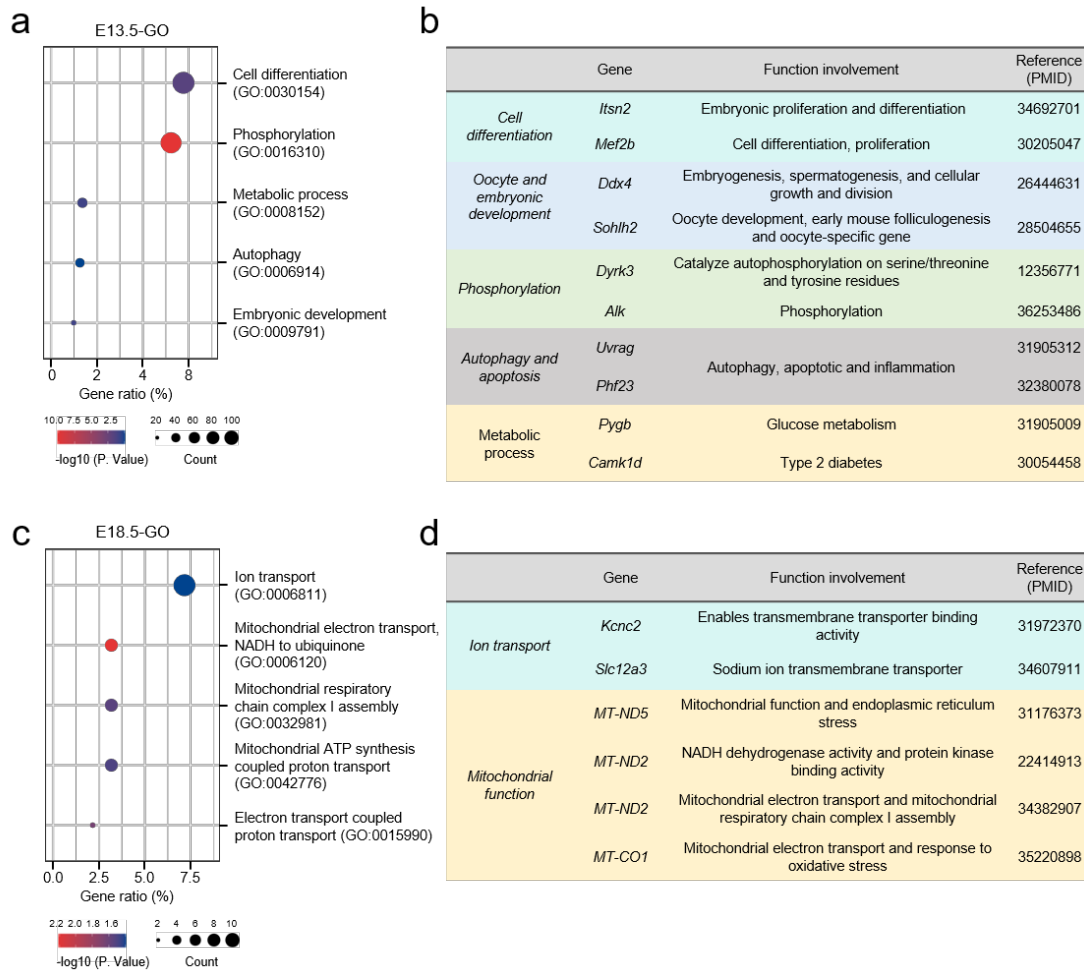

**Figure S7. GO enrichment analysis of DMRs.** **a, c**, GO enrichment analysis results for DMRs in E13.5 and E18.5 fetal oocytes. **b, d**, Function and reference display of selected genes associated DMRs.

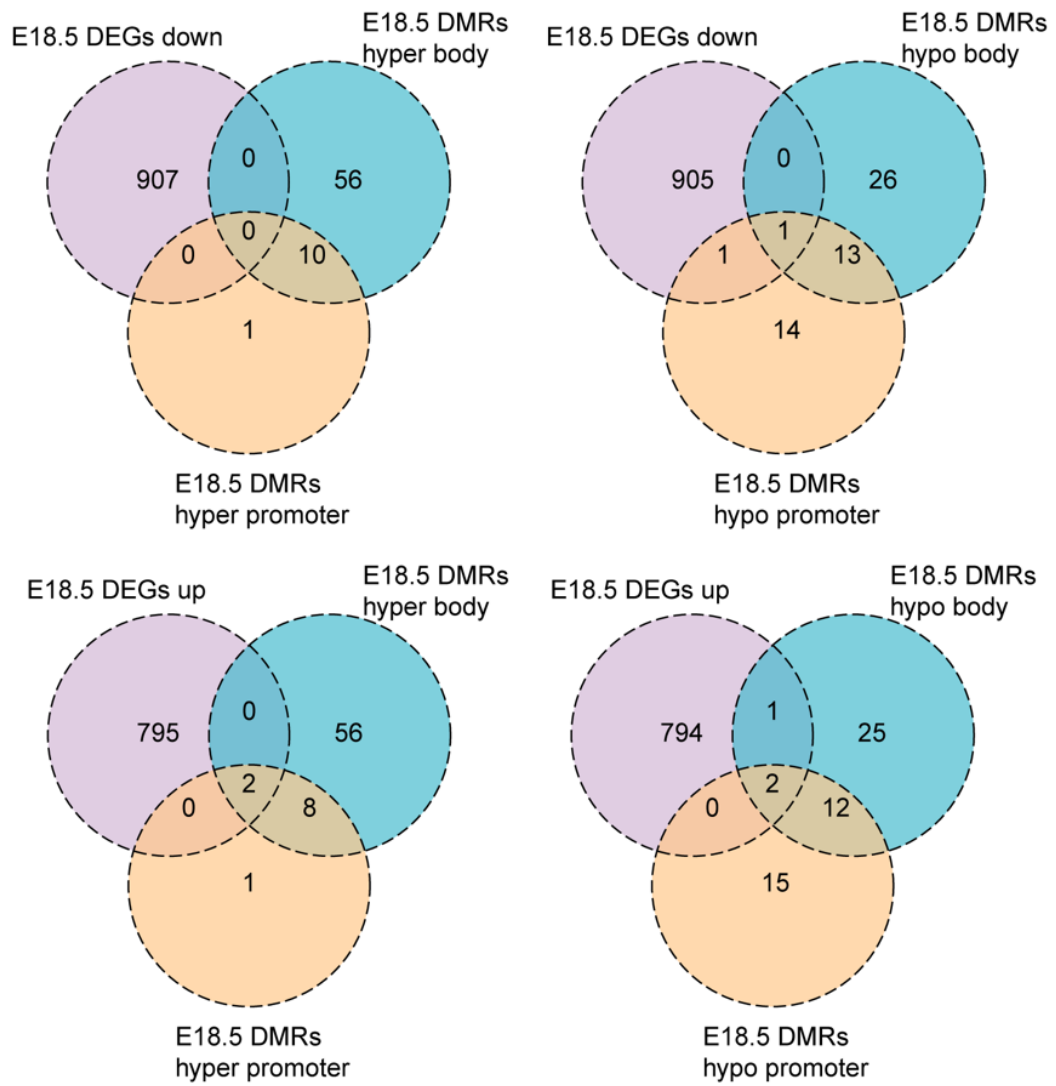

**Figure S8. Venn diagrams showing the overlap between differentially expressed genes and the genes with hypo-/hyper-methylated regions in E18.5 PGCs.**

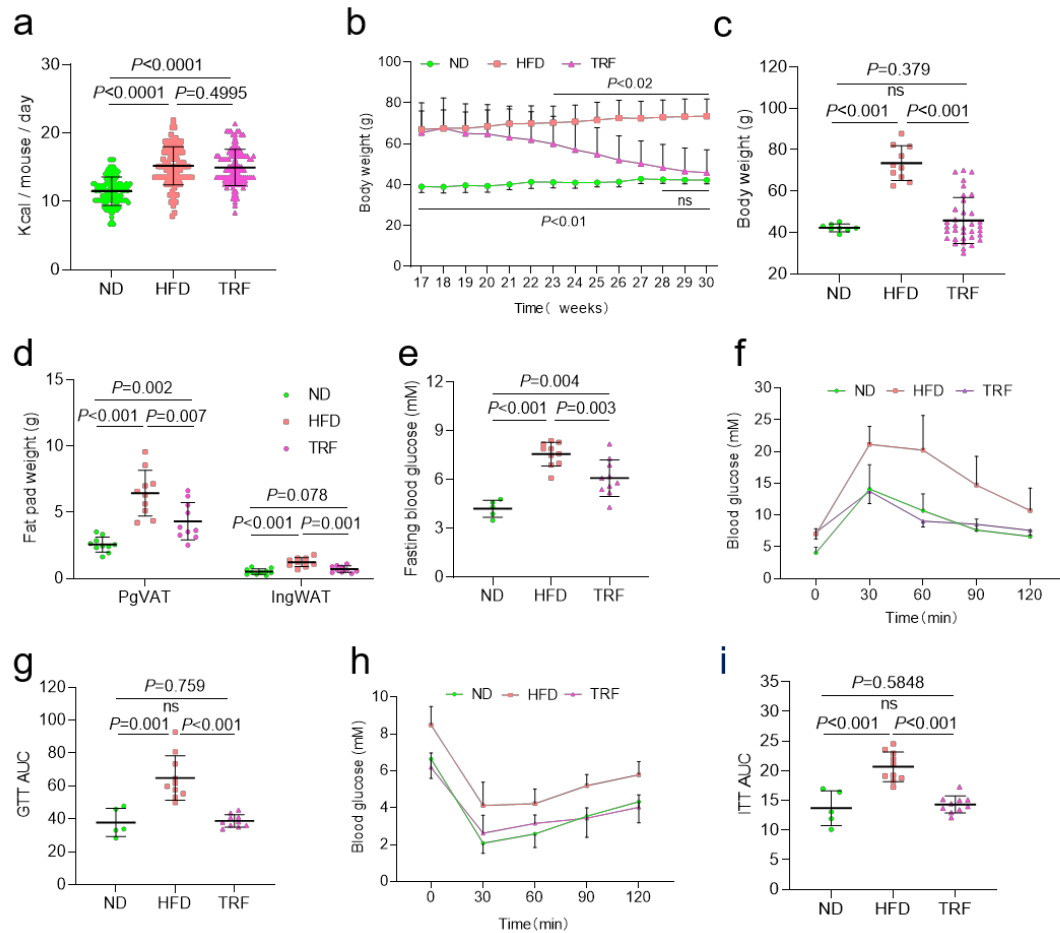

**Figure S9. TRF enhances glucose metabolism in HFD-induced obese mice.** **a**, Daily average food intake in mice under ND, HFD, and TRF conditions (n = 12 for each group). **b**, Weekly body weights of mice in ND, HFD, and TRF groups after initiating the TRF protocol (n = 8 for ND, n = 10 for HFD, n = 35 for TRF). **c**, The final weight of each group of mice. **d**, After TRF, measurements of pgVAT and ingWAT fat mass in each group (n = 10 in each group). **e-i**, Assessment of blood glucose levels in mice after an 8-hour fast (**e**) fasting blood glucose (n = 5 for ND mice, n = 10 for HFD mice, n = 10 for TRF), blood glucose levels during GTT and calculation of AUC (**f, g**), blood glucose levels during ITT and calculation of AUC (**h, i**) (n = 5 for ND, n = 10 for HFD, n = 10 for TRF). Data presented as mean  $\pm$  SD. Student's *t*-test (two-tailed) was employed for statistical analysis. Significance was set at P-value <0.05. "n.s." indicating no statistical significance.

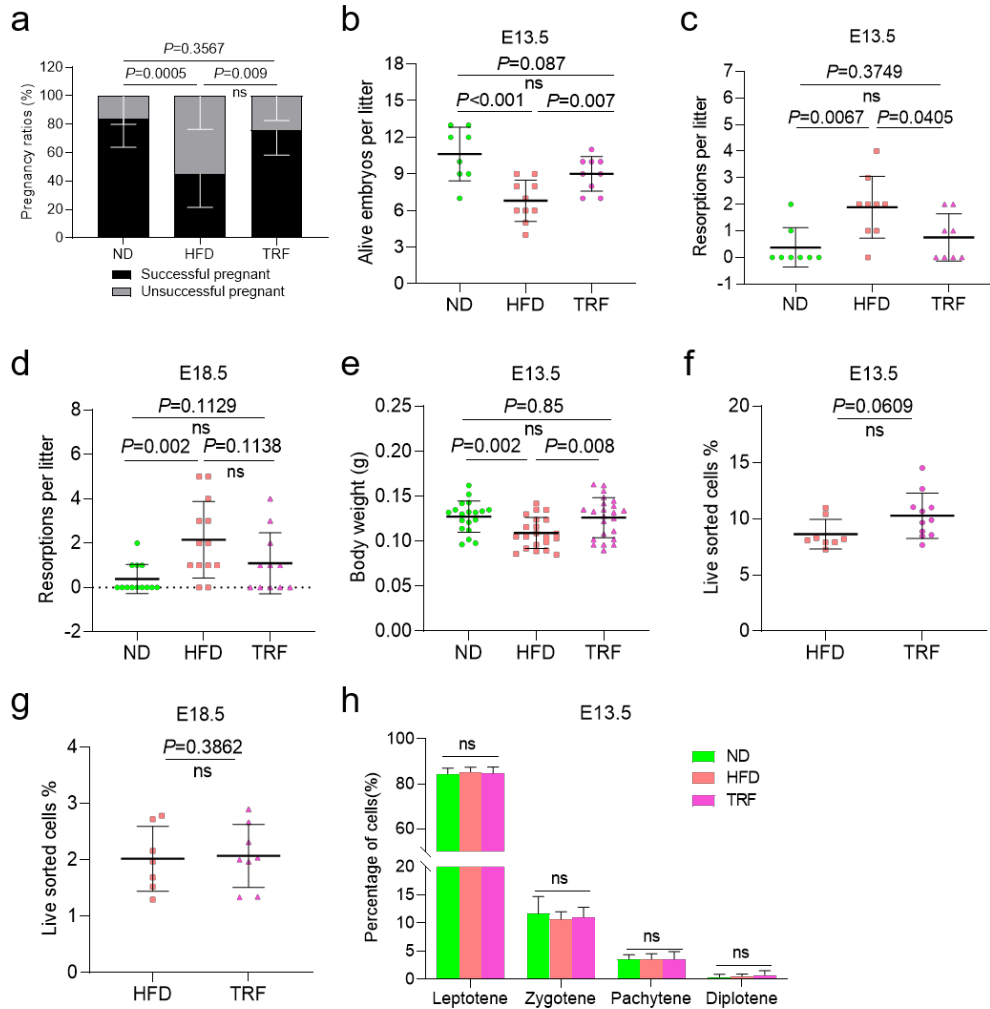

**Figure S10. TRF enhances fetal development in HFD-induced obese mice.** **a**, Assessment of pregnancy rates in each group of mice ( $n = 13$  for ND,  $n = 9$  for HFD,  $n = 8$  for TRF). **b**, Evaluation of fetal development in surviving embryos at E13.5. TRF improved the rate of viable fetuses in HFD mice ( $n = 8$  for ND,  $n = 10$  for HFD,  $n = 9$  for TRF). **c, d**, Reduction in fetal absorption rate in HFD mice at E13.5 and E18.5 with TRF. **e**, Assessment of fetal body weight at E13.5. **f, g**, Quantification of the number of SSEA-1<sup>+</sup> oocytes in each fetus at E13.5 and E18.5 ( $n = 8$  for HFD and  $n = 11$  for TRF at E13.5,  $n = 7$  for HFD and  $n = 8$  for TRF at E18.5). **h**, Analysis of meiotic stages frequencies in ND ( $n=535$ ), HFD ( $n=592$ ) and TRF ( $n=534$ ) fetus oocytes at E13.5. A minimum of three mice were analyzed for each group. Data represented as mean  $\pm$  SD. Student's *t*-test (two-tailed) was applied for statistical analysis. Significance was set at  $P$ -value  $<0.05$ . "n.s." indicating no statistical significance.

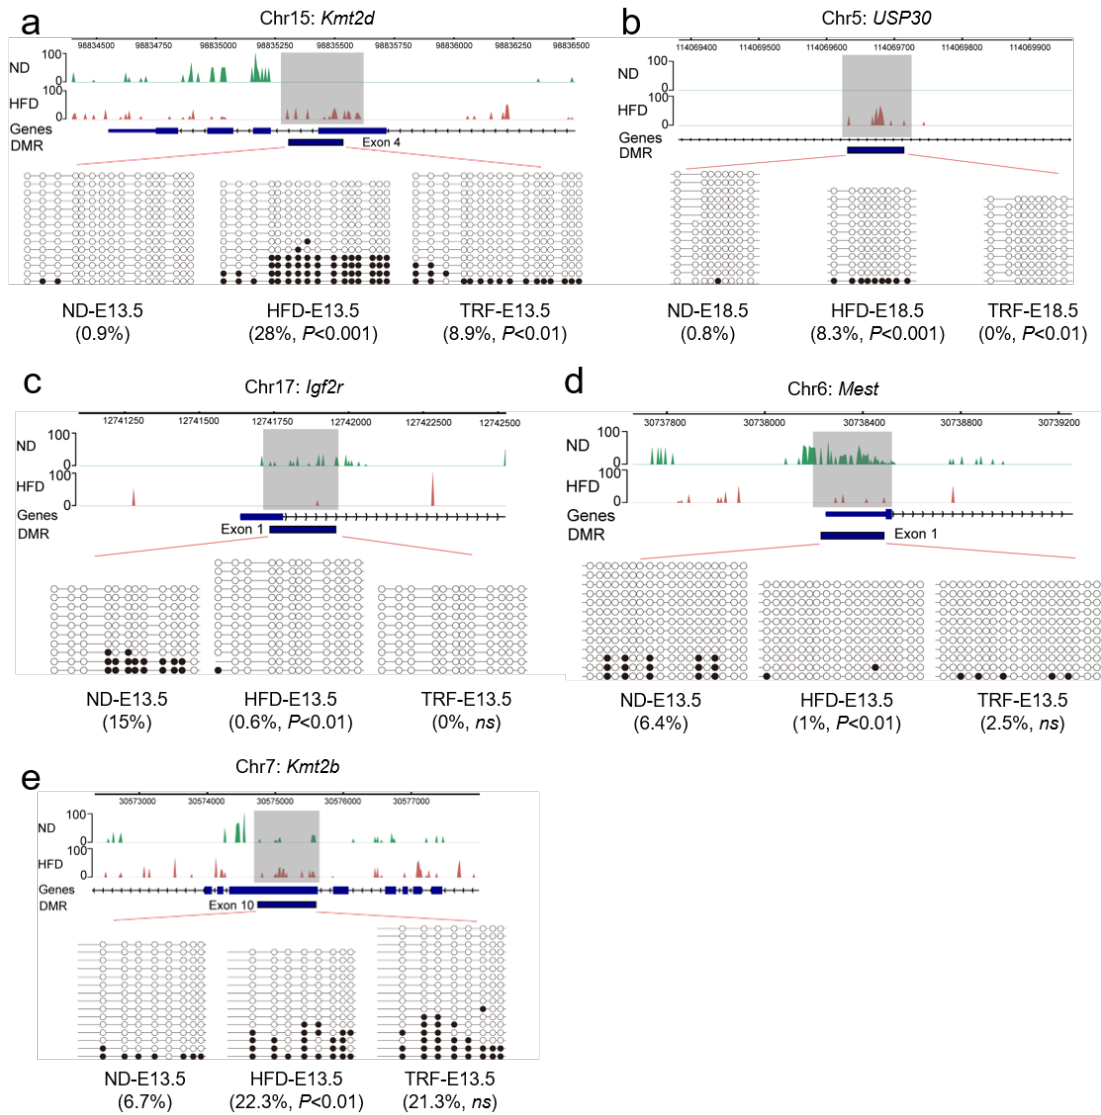

**Figure S11. Impact of HFD and TRF on methylation patterns of fetal oocytes in HFD mice.**

Graphical depiction of methylation patterns at different genomic loci in ND, HFD, and TRF fetal oocytes. The region enclosed by the gray box was selected for further validation. BS-seq analysis confirming the methylation status of *kmt2d*, *USP30*, *Mest*, *Igf2r*, and *Kmt2b* in ND, HFD, and TRF fetal oocytes. Open and filled circles represent unmethylated and methylated CpGs, respectively. Percentages of methylated CpGs are displayed beneath each panel. Significance was set at P-value  $< 0.05$ . "n.s." indicating no statistical significance.

**Table S1****Identified 1704 DEGs between ND and HFD fetal oocytes at E18.5.**

| baseMean | log2FoldC | lfcSE    | stat     | p.value  | p.adj    | gene name  | significance |
|----------|-----------|----------|----------|----------|----------|------------|--------------|
| 11687.34 | -10.6939  | 1.376628 | -7.76819 | 7.96E-15 | 1.25E-10 | Mrpl42     | DOWN         |
| 10185.49 | -10.4221  | 1.429441 | -7.29106 | 3.08E-13 | 2.42E-09 | Nhp2       | DOWN         |
| 4993.883 | -12.6429  | 1.840483 | -6.86934 | 6.45E-12 | 3.38E-08 | Sar1b      | DOWN         |
| 8886.196 | -9.56562  | 1.451457 | -6.59036 | 4.39E-11 | 1.67E-07 | Fth1       | DOWN         |
| 9697.495 | -10.828   | 1.658239 | -6.52984 | 6.58E-11 | 1.67E-07 | Rnf167     | DOWN         |
| 5627.827 | -10.7028  | 1.643661 | -6.51155 | 7.44E-11 | 1.67E-07 | Selenoh    | DOWN         |
| 6206.884 | -13.4463  | 2.052205 | -6.5521  | 5.67E-11 | 1.67E-07 | Utf1       | DOWN         |
| 9170.924 | -10.7258  | 1.670041 | -6.4225  | 1.34E-10 | 2.34E-07 | Snx12      | DOWN         |
| 7625.12  | -9.71834  | 1.51136  | -6.4302  | 1.27E-10 | 2.34E-07 | Supt4a     | DOWN         |
| 8461.513 | -9.93515  | 1.550895 | -6.40608 | 1.49E-10 | 2.35E-07 | Cdkn2aipnl | DOWN         |
| 8551.411 | -9.48743  | 1.528715 | -6.20615 | 5.43E-10 | 7.37E-07 | Lamtor5    | DOWN         |
| 7858.909 | -11.2074  | 1.807492 | -6.2005  | 5.63E-10 | 7.37E-07 | Ssna1      | DOWN         |
| 6021.936 | -9.76456  | 1.594515 | -6.12384 | 9.13E-10 | 1.10E-06 | Atp5md     | DOWN         |
| 5318     | -9.55343  | 1.632065 | -5.85359 | 4.81E-09 | 5.40E-06 | Ube2b      | DOWN         |
| 3094.397 | -10.133   | 1.766619 | -5.73584 | 9.70E-09 | 1.02E-05 | Polr2i     | DOWN         |
| 44.24476 | 4.97079   | 0.871887 | 5.701183 | 1.19E-08 | 1.17E-05 | Gm42900    | UP           |
| 7018.786 | -9.50866  | 1.685432 | -5.64168 | 1.68E-08 | 1.56E-05 | Rars2      | DOWN         |
| 57.39002 | 6.028621  | 1.076203 | 5.601753 | 2.12E-08 | 1.85E-05 | Gm43622    | UP           |
| 5439.153 | -12.1425  | 2.179416 | -5.57147 | 2.53E-08 | 2.09E-05 | Tmed3      | DOWN         |
| 4065.641 | -9.71523  | 1.762302 | -5.51281 | 3.53E-08 | 2.78E-05 | Scx        | DOWN         |
| 5914.966 | -8.44737  | 1.557241 | -5.42457 | 5.81E-08 | 4.15E-05 | Laptm4b    | DOWN         |
| 7710.716 | -8.68648  | 1.600942 | -5.42586 | 5.77E-08 | 4.15E-05 | Paklip1    | DOWN         |
| 3272.963 | -12.5121  | 2.323565 | -5.38486 | 7.25E-08 | 4.96E-05 | Rps41      | DOWN         |
| 10272.4  | -11.1126  | 2.082413 | -5.33642 | 9.48E-08 | 6.21E-05 | Smim12     | DOWN         |
| 4589.221 | -8.85991  | 1.671747 | -5.29979 | 1.16E-07 | 7.01E-05 | Hat1       | DOWN         |
| 4867.687 | -11.5574  | 2.178059 | -5.30629 | 1.12E-07 | 7.01E-05 | Lgals1     | DOWN         |
| 104.382  | -7.04884  | 1.337011 | -5.27209 | 1.35E-07 | 7.57E-05 | Gm7125     | DOWN         |
| 5271.016 | -9.74645  | 1.848302 | -5.27319 | 1.34E-07 | 7.57E-05 | Mrpl40     | DOWN         |
| 4761.435 | -8.56835  | 1.628068 | -5.2629  | 1.42E-07 | 7.69E-05 | Snrpd2     | DOWN         |
| 42.36453 | 6.524284  | 1.261973 | 5.169908 | 2.34E-07 | 1.23E-04 | Gm15758    | UP           |
| 5586.672 | -8.42635  | 1.64669  | -5.11714 | 3.10E-07 | 1.52E-04 | Asf1b      | DOWN         |
| 5744.948 | -8.42334  | 1.644784 | -5.12125 | 3.04E-07 | 1.52E-04 | Wdr75      | DOWN         |
| 1468.898 | -9.62559  | 1.893636 | -5.08313 | 3.71E-07 | 1.72E-04 | Pdss1      | DOWN         |
| 4631.352 | -8.50815  | 1.674095 | -5.08224 | 3.73E-07 | 1.72E-04 | Tecr       | DOWN         |
| 90.93844 | -6.8481   | 1.354122 | -5.05723 | 4.25E-07 | 1.91E-04 | Gm21399    | DOWN         |
| 6413.628 | -9.32182  | 1.861302 | -5.00822 | 5.49E-07 | 2.37E-04 | Golt1b     | DOWN         |
| 4337.335 | -13.2676  | 2.650742 | -5.00525 | 5.58E-07 | 2.37E-04 | Mettl18    | DOWN         |
| 36.56927 | -5.12084  | 1.034566 | -4.94975 | 7.43E-07 | 3.07E-04 | Rbx1-ps    | DOWN         |
| 5035.418 | 8.017527  | 1.622776 | 4.940625 | 7.79E-07 | 3.14E-04 | Sycp1      | UP           |
| 2793.405 | -8.5805   | 1.748935 | -4.90613 | 9.29E-07 | 3.65E-04 | Gstp1      | DOWN         |
| 7533.926 | 8.904121  | 1.827079 | 4.873419 | 1.10E-06 | 4.21E-04 | Uchl1      | UP           |
| 54.34481 | -5.60232  | 1.153352 | -4.85743 | 1.19E-06 | 4.45E-04 | Gm13604    | DOWN         |
| 3088.074 | 8.505659  | 1.75359  | 4.850426 | 1.23E-06 | 4.50E-04 | Zfp160     | UP           |
| 66.64935 | -5.4167   | 1.124668 | -4.81627 | 1.46E-06 | 5.13E-04 | Gm12669    | DOWN         |
| 3523.688 | -10.3698  | 2.15336  | -4.81563 | 1.47E-06 | 5.13E-04 | Pigp       | DOWN         |
| 3350.107 | -8.69719  | 1.80865  | -4.80866 | 1.52E-06 | 5.19E-04 | Mapk1      | DOWN         |
| 3169.194 | -8.59006  | 1.789491 | -4.80028 | 1.58E-06 | 5.30E-04 | Ubl4a      | DOWN         |
| 3451.34  | 8.106463  | 1.697446 | 4.775683 | 1.79E-06 | 5.87E-04 | AU015836   | UP           |
| 31.19469 | -4.41788  | 0.927917 | -4.76107 | 1.93E-06 | 6.11E-04 | Gm10095    | DOWN         |

|          |          |          |          |          |          |               |      |
|----------|----------|----------|----------|----------|----------|---------------|------|
| 56.34131 | -4.85255 | 1.019594 | -4.7593  | 1.94E-06 | 6.11E-04 | Ppplr15a      | DOWN |
| 6465.006 | -9.85437 | 2.079585 | -4.73862 | 2.15E-06 | 6.63E-04 | Mrpl47        | DOWN |
| 221.7098 | -6.50462 | 1.384084 | -4.69958 | 2.61E-06 | 7.88E-04 | Gstp2         | DOWN |
| 6790.995 | -9.44264 | 2.015091 | -4.68596 | 2.79E-06 | 8.26E-04 | 2210016F16Rik | DOWN |
| 2655.915 | -9.33303 | 1.993453 | -4.68184 | 2.84E-06 | 8.28E-04 | Rps2-ps13     | DOWN |
| 5379.937 | -9.75598 | 2.089575 | -4.66888 | 3.03E-06 | 8.66E-04 | Psmal         | DOWN |
| 2698.894 | -11.1358 | 2.391975 | -4.65547 | 3.23E-06 | 9.07E-04 | Manbal        | DOWN |
| 5982.698 | -10.0792 | 2.169232 | -4.64646 | 3.38E-06 | 9.31E-04 | Prpsap2       | DOWN |
| 2115.299 | -8.43617 | 1.818981 | -4.63786 | 3.52E-06 | 9.54E-04 | Siah1b        | DOWN |
| 520.8539 | -12.3296 | 2.662028 | -4.63165 | 3.63E-06 | 9.62E-04 | Gm44          | DOWN |
| 46.92309 | 4.673643 | 1.010344 | 4.625796 | 3.73E-06 | 9.62E-04 | Gpr34         | UP   |
| 657.7803 | -8.53384 | 1.844591 | -4.62641 | 3.72E-06 | 9.62E-04 | Rtraf-ps      | DOWN |
| 5594.677 | -10.152  | 2.197351 | -4.62012 | 3.84E-06 | 9.72E-04 | Cript         | DOWN |
| 5061.347 | 9.02794  | 1.9594   | 4.607502 | 4.08E-06 | 0.001017 | Pfdn5         | UP   |
| 996.3477 | -9.96818 | 2.166607 | -4.60082 | 4.21E-06 | 0.001034 | Psenen        | DOWN |
| 8983.48  | -9.30029 | 2.032293 | -4.57625 | 4.73E-06 | 0.001145 | Imp4          | DOWN |
| 3543.746 | -9.86344 | 2.159214 | -4.56807 | 4.92E-06 | 0.001172 | Cox7b         | DOWN |
| 4883.249 | 7.441855 | 1.630705 | 4.563581 | 5.03E-06 | 0.00118  | Elavl2        | UP   |
| 2894.858 | -10.3013 | 2.261485 | -4.55512 | 5.24E-06 | 0.00121  | Pdcd10        | DOWN |
| 6558.367 | -9.69534 | 2.130496 | -4.55074 | 5.35E-06 | 0.001218 | Supt3         | DOWN |
| 6649.924 | -9.36677 | 2.05987  | -4.54726 | 5.43E-06 | 0.00122  | No17          | DOWN |
| 4391.678 | -8.68604 | 1.914024 | -4.5381  | 5.68E-06 | 0.001239 | Hint1         | DOWN |
| 7944.669 | -9.56965 | 2.108223 | -4.5392  | 5.65E-06 | 0.001239 | Snap47        | DOWN |
| 36.51697 | -3.46903 | 0.767352 | -4.52078 | 6.16E-06 | 0.001313 | Aurka         | DOWN |
| 4573.517 | -7.31856 | 1.619114 | -4.5201  | 6.18E-06 | 0.001313 | Dock7         | DOWN |
| 3141.338 | 7.733295 | 1.714148 | 4.51145  | 6.44E-06 | 0.00135  | Myl6          | UP   |
| 8121.254 | -9.26853 | 2.059529 | -4.50032 | 6.79E-06 | 0.001403 | Nful          | DOWN |
| 3752.636 | -8.44301 | 1.880673 | -4.48936 | 7.14E-06 | 0.001422 | Atpif1        | DOWN |
| 5679.129 | -8.93571 | 1.990225 | -4.4898  | 7.13E-06 | 0.001422 | Coprs         | DOWN |
| 5402.912 | 7.086092 | 1.578019 | 4.490499 | 7.11E-06 | 0.001422 | Srp9          | UP   |
| 2939.011 | -11.0318 | 2.462594 | -4.47973 | 7.47E-06 | 0.00145  | Cox7a1        | DOWN |
| 197.4283 | -7.61612 | 1.699182 | -4.48223 | 7.39E-06 | 0.00145  | Tagap         | DOWN |
| 2783.142 | -7.8245  | 1.748725 | -4.4744  | 7.66E-06 | 0.00146  | Gpx4          | DOWN |
| 111.3295 | -6.96803 | 1.557772 | -4.47308 | 7.71E-06 | 0.00146  | Mageb16       | DOWN |
| 58.72587 | 3.957734 | 0.888748 | 4.453154 | 8.46E-06 | 0.00152  | Cox17         | UP   |
| 2739.679 | 7.67165  | 1.720733 | 4.458361 | 8.26E-06 | 0.00152  | Hspa41        | UP   |
| 3169.608 | -7.60856 | 1.709027 | -4.45198 | 8.51E-06 | 0.00152  | Ipo9          | DOWN |
| 3417.75  | -9.7408  | 2.187665 | -4.4526  | 8.48E-06 | 0.00152  | Rhox6         | DOWN |
| 6031.941 | -8.16511 | 1.832113 | -4.45667 | 8.32E-06 | 0.00152  | Uqcrb         | DOWN |
| 121.5146 | -5.59029 | 1.257954 | -4.44395 | 8.83E-06 | 0.001543 | Rhox9         | DOWN |
| 2942.467 | 7.614361 | 1.712717 | 4.445778 | 8.76E-06 | 0.001543 | Trim33        | UP   |
| 4174.907 | -9.7603  | 2.201085 | -4.43431 | 9.24E-06 | 0.001596 | Rps19bp1      | DOWN |
| 145.4179 | 6.797471 | 1.53402  | 4.43115  | 9.37E-06 | 0.001602 | Scml1         | UP   |
| 3788.259 | 7.94192  | 1.795537 | 4.423144 | 9.73E-06 | 0.00161  | Nobox         | UP   |
| 978.0273 | 9.874734 | 2.232351 | 4.423468 | 9.71E-06 | 0.00161  | Pet100        | UP   |
| 6889.443 | -9.05999 | 2.04809  | -4.42363 | 9.71E-06 | 0.00161  | Tiparp        | DOWN |
| 2461.478 | 7.667032 | 1.737903 | 4.411656 | 1.03E-05 | 0.001677 | Ola1          | UP   |
| 1145.487 | -10.172  | 2.306652 | -4.40983 | 1.03E-05 | 0.001677 | Rgcc          | DOWN |
| 58.63184 | 3.346276 | 0.759234 | 4.407438 | 1.05E-05 | 0.001678 | Coq8a         | UP   |
| 5014.468 | 7.06995  | 1.606827 | 4.399944 | 1.08E-05 | 0.001719 | Col4a1        | UP   |
| 111.394  | 6.622138 | 1.510956 | 4.382748 | 1.17E-05 | 0.001789 | Gm11739       | UP   |
| 1511.181 | 11.23487 | 2.566019 | 4.378325 | 1.20E-05 | 0.001789 | Gm43071       | UP   |
| 2464.772 | -7.82604 | 1.785039 | -4.38424 | 1.16E-05 | 0.001789 | Hmgn2         | DOWN |
| 2388.812 | -7.68006 | 1.753313 | -4.38031 | 1.19E-05 | 0.001789 | Lgr4          | DOWN |



|          |          |          |          |          |          |               |      |
|----------|----------|----------|----------|----------|----------|---------------|------|
| 2307.314 | -9.80058 | 2.238326 | -4.37853 | 1.19E-05 | 0.001789 | Ptrhd1        | DOWN |
| 3641.043 | -7.95737 | 1.818235 | -4.37643 | 1.21E-05 | 0.001789 | Sf3a3         | DOWN |
| 76.40898 | -5.29278 | 1.206572 | -4.38663 | 1.15E-05 | 0.001789 | Tuba3a        | DOWN |
| 3388.529 | 7.656881 | 1.752728 | 4.36855  | 1.25E-05 | 0.001838 | Taf71         | UP   |
| 965.4805 | -9.21982 | 2.113711 | -4.36191 | 1.29E-05 | 0.00184  | Acot9         | DOWN |
| 117.473  | -6.10321 | 1.399754 | -4.3602  | 1.30E-05 | 0.00184  | Eif3s6-ps2    | DOWN |
| 6071.86  | -9.09635 | 2.084406 | -4.364   | 1.28E-05 | 0.00184  | Mrpl52        | DOWN |
| 1454.336 | -9.13163 | 2.091897 | -4.36524 | 1.27E-05 | 0.00184  | Tmx1          | DOWN |
| 138345.3 | 2.621308 | 0.601728 | 4.356304 | 1.32E-05 | 0.001857 | mt-Rnr2       | UP   |
| 2105.191 | -9.94693 | 2.288064 | -4.34731 | 1.38E-05 | 0.001904 | Alg14         | DOWN |
| 43.08915 | 3.745788 | 0.861714 | 4.346907 | 1.38E-05 | 0.001904 | Nudt16l1      | UP   |
| 3065.207 | -7.85149 | 1.81188  | -4.33334 | 1.47E-05 | 0.002008 | Eif4a1        | DOWN |
| 128.4436 | -5.83867 | 1.349153 | -4.32765 | 1.51E-05 | 0.002025 | Tmed2         | DOWN |
| 7832.211 | -8.52916 | 1.970166 | -4.32916 | 1.50E-05 | 0.002025 | Tpgs2         | DOWN |
| 1783.419 | -10.0207 | 2.324588 | -4.31073 | 1.63E-05 | 0.002168 | Car13         | DOWN |
| 1160.182 | 9.971443 | 2.319701 | 4.29859  | 1.72E-05 | 0.002252 | A230005M16Rik | UP   |
| 231.3569 | -7.33336 | 1.705604 | -4.29957 | 1.71E-05 | 0.002252 | Fam216a       | DOWN |
| 998.0984 | -8.10825 | 1.888482 | -4.29353 | 1.76E-05 | 0.002282 | Rab9          | DOWN |
| 84.41751 | -4.09199 | 0.953528 | -4.29143 | 1.78E-05 | 0.002282 | Stk381        | DOWN |
| 5433.329 | -9.41349 | 2.194209 | -4.29015 | 1.79E-05 | 0.002282 | Surf1         | DOWN |
| 1383.959 | -10.0009 | 2.333177 | -4.28638 | 1.82E-05 | 0.002302 | I190007I07Rik | DOWN |
| 457.5148 | 10.07689 | 2.353967 | 4.280811 | 1.86E-05 | 0.002342 | C230086J09Rik | UP   |
| 2027.019 | -8.50822 | 1.990031 | -4.27542 | 1.91E-05 | 0.00238  | Plp2          | DOWN |
| 95.90659 | -4.69376 | 1.098347 | -4.27348 | 1.92E-05 | 0.002382 | Gm9333        | DOWN |
| 154.7566 | -6.42935 | 1.505156 | -4.27155 | 1.94E-05 | 0.002384 | 4930549G23Rik | DOWN |
| 43.3915  | -3.38163 | 0.792567 | -4.26668 | 1.98E-05 | 0.002418 | Ube2d1        | DOWN |
| 1623.771 | -9.46681 | 2.220087 | -4.26416 | 2.01E-05 | 0.002426 | I110038F14Rik | DOWN |
| 5465.245 | 8.92727  | 2.096667 | 4.257839 | 2.06E-05 | 0.00244  | Dmap1         | UP   |
| 246.6807 | -7.5679  | 1.77679  | -4.25931 | 2.05E-05 | 0.00244  | Phlda2        | DOWN |
| 1467.161 | -7.55027 | 1.772183 | -4.26044 | 2.04E-05 | 0.00244  | Ss1812        | DOWN |
| 7114.013 | -8.75562 | 2.058967 | -4.25243 | 2.11E-05 | 0.002481 | Coq7          | DOWN |
| 299.7176 | -6.99093 | 1.646223 | -4.24665 | 2.17E-05 | 0.00252  | Cox11         | DOWN |
| 3628     | -7.19564 | 1.694862 | -4.24556 | 2.18E-05 | 0.00252  | Metap2        | DOWN |
| 123.57   | -6.0994  | 1.438904 | -4.23892 | 2.25E-05 | 0.002577 | Nipsnap3b     | DOWN |
| 983.7321 | 9.494298 | 2.245141 | 4.228821 | 2.35E-05 | 0.002656 | O610040J01Rik | UP   |
| 1215.845 | -8.77052 | 2.074728 | -4.22731 | 2.37E-05 | 0.002656 | Gm37219       | DOWN |
| 2463.101 | 7.423187 | 1.755929 | 4.227499 | 2.36E-05 | 0.002656 | Znrf1         | UP   |
| 2185.556 | -7.61762 | 1.805806 | -4.2184  | 2.46E-05 | 0.002743 | Vamp4         | DOWN |
| 5494.853 | -7.47558 | 1.774159 | -4.21359 | 2.51E-05 | 0.002782 | Pole          | DOWN |
| 2479.558 | -8.32192 | 1.977863 | -4.20753 | 2.58E-05 | 0.002796 | Z310061I04Rik | DOWN |
| 3046.423 | -9.35705 | 2.223679 | -4.20791 | 2.58E-05 | 0.002796 | B230118H07Rik | DOWN |
| 4899.953 | -9.08689 | 2.160358 | -4.2062  | 2.60E-05 | 0.002796 | Dnd1          | DOWN |
| 2172.117 | 9.186711 | 2.182403 | 4.209447 | 2.56E-05 | 0.002796 | Gtsf1         | UP   |
| 2102.228 | 9.776662 | 2.326313 | 4.202644 | 2.64E-05 | 0.002821 | Gm47918       | UP   |
| 2776.582 | 9.01221  | 2.146324 | 4.198905 | 2.68E-05 | 0.002849 | Thy1          | UP   |
| 4268.307 | -9.13959 | 2.179692 | -4.19307 | 2.75E-05 | 0.002884 | Hikeshi       | DOWN |
| 1860.197 | 8.726494 | 2.080607 | 4.194205 | 2.74E-05 | 0.002884 | Sdf2          | UP   |
| 3732.15  | 9.382063 | 2.245455 | 4.178245 | 2.94E-05 | 0.003058 | Znrd1         | UP   |
| 199.6428 | -6.86599 | 1.645094 | -4.17362 | 3.00E-05 | 0.00308  | Ak6           | DOWN |
| 2216.998 | 7.313108 | 1.751792 | 4.174644 | 2.98E-05 | 0.00308  | Dctn2         | UP   |
| 165.4421 | -6.03901 | 1.44897  | -4.1678  | 3.08E-05 | 0.003139 | Timm8b        | DOWN |
| 4694.542 | 9.263701 | 2.225108 | 4.163259 | 3.14E-05 | 0.003182 | Pcbd2         | UP   |
| 2429.732 | -9.34685 | 2.249692 | -4.15472 | 3.26E-05 | 0.003225 | Arl6ip4       | DOWN |
| 2662.028 | 7.552257 | 1.817895 | 4.154396 | 3.26E-05 | 0.003225 | Atg14         | UP   |

|          |          |          |          |          |          |           |      |
|----------|----------|----------|----------|----------|----------|-----------|------|
| 3484.236 | -9.35552 | 2.249719 | -4.15853 | 3.20E-05 | 0.003225 | Ndufa8    | DOWN |
| 938.4684 | 7.323846 | 1.762768 | 4.154743 | 3.26E-05 | 0.003225 | Prps1     | UP   |
| 4051.087 | -8.88822 | 2.140288 | -4.15282 | 3.28E-05 | 0.003226 | Clip3     | DOWN |
| 1695.589 | 9.59603  | 2.311514 | 4.151405 | 3.30E-05 | 0.003226 | Mrps18b   | UP   |
| 3230.959 | -9.12877 | 2.200124 | -4.14921 | 3.34E-05 | 0.003237 | Ensa      | DOWN |
| 1556.883 | 8.313227 | 2.004409 | 4.147471 | 3.36E-05 | 0.003239 | Figla     | UP   |
| 4521.843 | -7.81529 | 1.885516 | -4.14491 | 3.40E-05 | 0.003239 | Mrpl23    | DOWN |
| 392.6043 | -8.26239 | 1.993067 | -4.14557 | 3.39E-05 | 0.003239 | Prss23    | DOWN |
| 2472.846 | -9.60589 | 2.321028 | -4.13863 | 3.49E-05 | 0.003269 | Eeflakmt1 | DOWN |
| 87.48093 | -5.27002 | 1.27399  | -4.13662 | 3.52E-05 | 0.003269 | Gm15501   | DOWN |
| 40.6885  | -3.70972 | 0.89724  | -4.1346  | 3.56E-05 | 0.003269 | Nit2      | DOWN |
| 1748.97  | -9.75934 | 2.356947 | -4.14067 | 3.46E-05 | 0.003269 | Nop10     | DOWN |
| 254.5841 | -6.57825 | 1.590808 | -4.13516 | 3.55E-05 | 0.003269 | Pcna      | DOWN |
| 2238.575 | -8.12544 | 1.962829 | -4.13966 | 3.48E-05 | 0.003269 | Sh3gl3    | DOWN |
| 6412.634 | -8.41536 | 2.037707 | -4.12982 | 3.63E-05 | 0.003318 | AU022252  | DOWN |
| 22.3266  | 4.216962 | 1.021843 | 4.126819 | 3.68E-05 | 0.003329 | Gm9320    | UP   |
| 1973.725 | -9.36492 | 2.269521 | -4.12639 | 3.69E-05 | 0.003329 | Spag7     | DOWN |
| 58.73568 | -2.99668 | 0.726497 | -4.12483 | 3.71E-05 | 0.003333 | Mcm4      | DOWN |
| 5093.221 | -8.87592 | 2.15252  | -4.1235  | 3.73E-05 | 0.003333 | Ndufv3    | DOWN |
| 2546.102 | 7.178972 | 1.744337 | 4.115588 | 3.86E-05 | 0.00343  | Kif5b     | UP   |
| 2424.092 | -8.46613 | 2.059945 | -4.10988 | 3.96E-05 | 0.003441 | Clqbp     | DOWN |
| 86.28574 | 5.482653 | 1.333447 | 4.111641 | 3.93E-05 | 0.003441 | Gnpnat1   | UP   |
| 89.73134 | -4.98713 | 1.213504 | -4.1097  | 3.96E-05 | 0.003441 | Rpl15-ps6 | DOWN |
| 174.1989 | 7.524435 | 1.829185 | 4.113546 | 3.90E-05 | 0.003441 | S100a1    | UP   |
| 1021.64  | 9.506937 | 2.315213 | 4.10629  | 4.02E-05 | 0.003473 | Gm9012    | UP   |
| 1930.009 | 8.740753 | 2.130479 | 4.102717 | 4.08E-05 | 0.003508 | Ntpcr     | UP   |
| 50.08454 | 3.315686 | 0.809753 | 4.094688 | 4.23E-05 | 0.003612 | Mbl2      | UP   |
| 518.0572 | -7.5489  | 1.844986 | -4.09158 | 4.28E-05 | 0.003641 | Pgam1     | DOWN |
| 2052.106 | -9.00014 | 2.203513 | -4.08445 | 4.42E-05 | 0.003734 | Gpx1      | DOWN |
| 61.81807 | -3.59194 | 0.879989 | -4.0818  | 4.47E-05 | 0.00374  | Pisd      | DOWN |
| 2415.258 | 9.037347 | 2.214184 | 4.08157  | 4.47E-05 | 0.00374  | Tmem129   | UP   |
| 3176.733 | 7.171055 | 1.757754 | 4.07967  | 4.51E-05 | 0.003751 | Map4      | UP   |
| 105.819  | -5.64512 | 1.385689 | -4.07388 | 4.62E-05 | 0.0038   | Pcdhb17   | DOWN |
| 2024.77  | -8.96813 | 2.201118 | -4.07435 | 4.61E-05 | 0.0038   | Psmg2     | DOWN |
| 4381.671 | 8.574487 | 2.106462 | 4.070564 | 4.69E-05 | 0.0038   | Stat5a    | UP   |
| 1683.622 | -9.03992 | 2.220196 | -4.07168 | 4.67E-05 | 0.0038   | Txn14a    | DOWN |
| 2623.163 | -8.17362 | 2.007469 | -4.07161 | 4.67E-05 | 0.0038   | Uchl3     | DOWN |
| 366.6296 | -8.16237 | 2.007466 | -4.06601 | 4.78E-05 | 0.003805 | Hspb6     | DOWN |
| 1949.887 | -9.36648 | 2.303878 | -4.06553 | 4.79E-05 | 0.003805 | Immp11    | DOWN |
| 3540.993 | 9.428649 | 2.319079 | 4.065686 | 4.79E-05 | 0.003805 | Mrps11    | UP   |
| 199.9188 | 7.56846  | 1.860861 | 4.067181 | 4.76E-05 | 0.003805 | Selenbp1  | UP   |
| 119.3603 | -5.43809 | 1.339553 | -4.05963 | 4.92E-05 | 0.003883 | Med19     | DOWN |
| 2195.734 | 8.713996 | 2.147329 | 4.058062 | 4.95E-05 | 0.003889 | Def8      | UP   |
| 2832.609 | -7.55978 | 1.86572  | -4.05194 | 5.08E-05 | 0.003973 | Lym4      | DOWN |
| 4033.361 | 7.003469 | 1.730148 | 4.047901 | 5.17E-05 | 0.004022 | Arpcla    | UP   |
| 119.4122 | -6.12158 | 1.512843 | -4.04641 | 5.20E-05 | 0.004028 | Xlr5c     | DOWN |
| 1678.378 | -9.08908 | 2.247994 | -4.0432  | 5.27E-05 | 0.004063 | Emc4      | DOWN |
| 3588.968 | 7.325432 | 1.816442 | 4.032847 | 5.51E-05 | 0.004189 | Atp9b     | UP   |
| 45.04498 | -3.60595 | 0.894027 | -4.03338 | 5.50E-05 | 0.004189 | Bet1      | DOWN |
| 2397.253 | -8.70081 | 2.157606 | -4.03262 | 5.52E-05 | 0.004189 | Cited1    | DOWN |
| 3786.521 | 6.791705 | 1.686132 | 4.027978 | 5.63E-05 | 0.004231 | Ccar1     | UP   |
| 2161.144 | -8.4451  | 2.096694 | -4.02782 | 5.63E-05 | 0.004231 | Dctpp1    | DOWN |
| 2441.336 | 7.020138 | 1.743312 | 4.026896 | 5.65E-05 | 0.004231 | Sart1     | UP   |
| 2495.127 | -8.4553  | 2.101633 | -4.02321 | 5.74E-05 | 0.004242 | Ice2      | DOWN |

|          |          |          |          |          |          |               |      |
|----------|----------|----------|----------|----------|----------|---------------|------|
| 675.2201 | -9.0328  | 2.245313 | -4.02296 | 5.75E-05 | 0.004242 | S100a10       | DOWN |
| 3731.183 | -8.40444 | 2.088481 | -4.02419 | 5.72E-05 | 0.004242 | Tomm20        | DOWN |
| 31.24694 | -3.11486 | 0.775424 | -4.01698 | 5.89E-05 | 0.004251 | Nme4          | DOWN |
| 2211.256 | -7.10894 | 1.768764 | -4.01916 | 5.84E-05 | 0.004251 | Rbm15         | DOWN |
| 3071.615 | -10.2086 | 2.541291 | -4.01708 | 5.89E-05 | 0.004251 | Rhox5         | DOWN |
| 1723.844 | -9.70902 | 2.416729 | -4.01742 | 5.88E-05 | 0.004251 | Sh3bgrl3      | DOWN |
| 1694.857 | 7.076781 | 1.76113  | 4.018319 | 5.86E-05 | 0.004251 | Smdt1         | UP   |
| 44.70739 | -2.97212 | 0.740618 | -4.01303 | 5.99E-05 | 0.004303 | Cers2         | DOWN |
| 216.6692 | 6.702451 | 1.670804 | 4.011512 | 6.03E-05 | 0.004311 | Gm28370       | UP   |
| 1009.202 | -8.77975 | 2.190701 | -4.00773 | 6.13E-05 | 0.004361 | Riok2         | DOWN |
| 1203.74  | -7.56311 | 1.888725 | -4.00435 | 6.22E-05 | 0.004404 | Rpl29         | DOWN |
| 623.1292 | -8.33693 | 2.085522 | -3.99752 | 6.40E-05 | 0.004492 | Bex4          | DOWN |
| 2605.16  | 8.988782 | 2.248592 | 3.997516 | 6.40E-05 | 0.004492 | Nat14         | UP   |
| 992.4402 | -7.14271 | 1.788575 | -3.99352 | 6.51E-05 | 0.004548 | Ddx18         | DOWN |
| 277.172  | -6.09544 | 1.528665 | -3.98742 | 6.68E-05 | 0.004646 | Tceal9        | DOWN |
| 3419.867 | -8.95794 | 2.248272 | -3.98436 | 6.77E-05 | 0.004686 | Gm11426       | DOWN |
| 3546.973 | -8.77053 | 2.203262 | -3.9807  | 6.87E-05 | 0.004738 | Fam210b       | DOWN |
| 3908.704 | -8.80794 | 2.215548 | -3.97551 | 7.02E-05 | 0.004771 | Dnajb1        | DOWN |
| 3610.939 | 7.356003 | 1.850619 | 3.974889 | 7.04E-05 | 0.004771 | Fos           | UP   |
| 41.828   | -3.32699 | 0.836939 | -3.97519 | 7.03E-05 | 0.004771 | Polr2j        | DOWN |
| 1884.958 | -8.61127 | 2.1662   | -3.97529 | 7.03E-05 | 0.004771 | Pdpf          | DOWN |
| 103.4209 | 5.838779 | 1.469593 | 3.973059 | 7.10E-05 | 0.004787 | Rnl5          | UP   |
| 2965.466 | 8.799101 | 2.216717 | 3.969429 | 7.20E-05 | 0.00484  | Maoa          | UP   |
| 3581.988 | 8.641752 | 2.181873 | 3.960704 | 7.47E-05 | 0.004863 | Cnpy4         | UP   |
| 285.1161 | -8.69656 | 2.19628  | -3.95968 | 7.51E-05 | 0.004863 | Gm17251       | DOWN |
| 99.0383  | -5.96451 | 1.50599  | -3.96052 | 7.48E-05 | 0.004863 | Gm8663        | DOWN |
| 938.2343 | -8.61787 | 2.175147 | -3.96197 | 7.43E-05 | 0.004863 | Itm2a         | DOWN |
| 52.90709 | -3.79166 | 0.955814 | -3.96694 | 7.28E-05 | 0.004863 | Pcdh7         | DOWN |
| 2162.646 | 7.167017 | 1.808874 | 3.962142 | 7.43E-05 | 0.004863 | Pebp1         | UP   |
| 1574.009 | -9.52667 | 2.403622 | -3.96347 | 7.39E-05 | 0.004863 | Rbis          | DOWN |
| 3744.14  | -8.74571 | 2.208914 | -3.95928 | 7.52E-05 | 0.004863 | Smoc1         | DOWN |
| 3342.894 | -8.62975 | 2.177395 | -3.96334 | 7.39E-05 | 0.004863 | Snrpa1        | DOWN |
| 1217.495 | -8.8108  | 2.228512 | -3.95367 | 7.70E-05 | 0.004878 | Cyct          | DOWN |
| 83.99803 | -4.66868 | 1.180822 | -3.95376 | 7.69E-05 | 0.004878 | D17H6S53E     | DOWN |
| 2604.817 | 8.92488  | 2.256718 | 3.954806 | 7.66E-05 | 0.004878 | Dctn3         | UP   |
| 43.00467 | -2.75252 | 0.69562  | -3.95693 | 7.59E-05 | 0.004878 | Lgr6          | DOWN |
| 2599.146 | 9.137114 | 2.310671 | 3.954313 | 7.68E-05 | 0.004878 | Mrpl16        | UP   |
| 697.353  | -6.91074 | 1.748445 | -3.95251 | 7.73E-05 | 0.004882 | Psmb7         | DOWN |
| 2315.931 | -6.93056 | 1.754991 | -3.94906 | 7.85E-05 | 0.004934 | Set           | DOWN |
| 155.9723 | -5.82895 | 1.477826 | -3.94427 | 8.00E-05 | 0.005013 | Rps18-ps1     | DOWN |
| 1468.141 | -8.43515 | 2.139313 | -3.94293 | 8.05E-05 | 0.005021 | Ostc          | DOWN |
| 860.3287 | -6.88649 | 1.747454 | -3.94087 | 8.12E-05 | 0.005037 | Amt           | DOWN |
| 5711.198 | -8.08162 | 2.051078 | -3.94018 | 8.14E-05 | 0.005037 | Kcp           | DOWN |
| 256.9778 | 7.675391 | 1.948392 | 3.939346 | 8.17E-05 | 0.005037 | Map2k3os      | UP   |
| 1554.98  | -8.76766 | 2.226701 | -3.93751 | 8.23E-05 | 0.005056 | Pde6d         | DOWN |
| 2093.255 | -8.57304 | 2.17955  | -3.9334  | 8.38E-05 | 0.005123 | Cwc15         | DOWN |
| 304.7484 | -6.2897  | 1.599487 | -3.93232 | 8.41E-05 | 0.005126 | Ptpn2         | DOWN |
| 6537.484 | 6.66712  | 1.698275 | 3.925818 | 8.64E-05 | 0.005246 | Ncl           | UP   |
| 1792.083 | -8.61144 | 2.194445 | -3.9242  | 8.70E-05 | 0.005261 | Mrps12        | DOWN |
| 739.5072 | -7.50145 | 1.913926 | -3.9194  | 8.88E-05 | 0.005319 | Ifitm2        | DOWN |
| 157.6536 | 6.173954 | 1.574919 | 3.920173 | 8.85E-05 | 0.005319 | Noxred1       | UP   |
| 3210.445 | -8.50827 | 2.17113  | -3.91882 | 8.90E-05 | 0.005319 | Tk2           | DOWN |
| 3900.485 | -8.41345 | 2.150211 | -3.91285 | 9.12E-05 | 0.005431 | Psma6         | DOWN |
| 508.3948 | 9.249261 | 2.367682 | 3.906462 | 9.37E-05 | 0.005556 | 4833412C15Rik | UP   |

|          |          |          |          |          |          |               |      |
|----------|----------|----------|----------|----------|----------|---------------|------|
| 618.8374 | 9.215551 | 2.361521 | 3.902379 | 9.53E-05 | 0.005629 | Gl t28d2      | UP   |
| 504.7177 | -6.32224 | 1.621968 | -3.89788 | 9.70E-05 | 0.005713 | Scml2         | DOWN |
| 2803.894 | 8.692751 | 2.233605 | 3.891803 | 9.95E-05 | 0.005727 | Ak3           | UP   |
| 4287.178 | 8.453528 | 2.169618 | 3.896321 | 9.77E-05 | 0.005727 | Cnpy1         | UP   |
| 4844.072 | -8.32426 | 2.140034 | -3.88978 | 1.00E-04 | 0.005727 | Mrpl58        | DOWN |
| 2874.707 | -8.80776 | 2.264865 | -3.88887 | 1.01E-04 | 0.005727 | Naa38         | DOWN |
| 1651.712 | 8.487876 | 2.181693 | 3.890499 | 1.00E-04 | 0.005727 | Nptx2         | UP   |
| 1871.151 | -8.27723 | 2.128705 | -3.88839 | 1.01E-04 | 0.005727 | Nsmce4a       | DOWN |
| 153.3534 | -5.49523 | 1.413221 | -3.88844 | 1.01E-04 | 0.005727 | Plod2         | DOWN |
| 2806.839 | 6.727019 | 1.729761 | 3.888988 | 1.01E-04 | 0.005727 | Rnf10         | UP   |
| 48.2101  | -3.19621 | 0.820794 | -3.89405 | 9.86E-05 | 0.005727 | Tmem147       | DOWN |
| 1718.389 | 7.174057 | 1.841804 | 3.895125 | 9.81E-05 | 0.005727 | Tollip        | UP   |
| 252.8607 | 7.913973 | 2.036013 | 3.886996 | 1.01E-04 | 0.00573  | 1810041H14Rik | UP   |
| 172.0819 | -4.81169 | 1.238108 | -3.88632 | 1.02E-04 | 0.00573  | Epcam         | DOWN |
| 4944.266 | 8.080261 | 2.07951  | 3.885657 | 1.02E-04 | 0.00573  | Osgep         | UP   |
| 1527.66  | 7.29767  | 1.87901  | 3.883785 | 1.03E-04 | 0.005753 | BC031181      | UP   |
| 364.3918 | -7.68008 | 1.97836  | -3.88204 | 1.04E-04 | 0.005754 | 0610009B22Rik | DOWN |
| 2939.686 | 8.721014 | 2.246253 | 3.882472 | 1.03E-04 | 0.005754 | Tut1          | UP   |
| 3129.685 | -8.66346 | 2.232704 | -3.88025 | 1.04E-04 | 0.005776 | Tbata         | DOWN |
| 2937.068 | -6.66264 | 1.718723 | -3.87651 | 1.06E-04 | 0.005845 | Gsdme         | DOWN |
| 4491.533 | 7.256895 | 1.87349  | 3.873463 | 1.07E-04 | 0.005877 | Cdc37l1       | UP   |
| 384.04   | 8.842589 | 2.282662 | 3.873806 | 1.07E-04 | 0.005877 | Gm48742       | UP   |
| 2215.292 | -8.54474 | 2.209294 | -3.86764 | 1.10E-04 | 0.005998 | Porcn         | DOWN |
| 33.53983 | -3.27887 | 0.848504 | -3.86429 | 1.11E-04 | 0.00606  | Dph3          | DOWN |
| 2559.402 | 8.487493 | 2.197491 | 3.862356 | 1.12E-04 | 0.006087 | Rtf2          | UP   |
| 2869.921 | 8.840769 | 2.290894 | 3.859091 | 1.14E-04 | 0.006089 | Ccdc59        | UP   |
| 2889.26  | 6.750867 | 1.748991 | 3.859864 | 1.13E-04 | 0.006089 | Lig1          | UP   |
| 3389.219 | -8.41462 | 2.180551 | -3.85894 | 1.14E-04 | 0.006089 | Prdx6         | DOWN |
| 4093.403 | 8.106763 | 2.100722 | 3.859036 | 1.14E-04 | 0.006089 | Rbak          | UP   |
| 3259.567 | -8.40198 | 2.178673 | -3.85647 | 1.15E-04 | 0.006109 | Cdc42ep2      | DOWN |
| 1450.53  | 8.469516 | 2.195737 | 3.857255 | 1.15E-04 | 0.006109 | Ogfod1        | UP   |
| 6323.999 | -7.68291 | 1.993144 | -3.85467 | 1.16E-04 | 0.006134 | Topbp1        | DOWN |
| 4130.205 | 8.369469 | 2.175121 | 3.847817 | 1.19E-04 | 0.006287 | Usp11         | UP   |
| 117.9334 | -5.45758 | 1.423365 | -3.83428 | 1.26E-04 | 0.006621 | Sdhaf4        | DOWN |
| 35.23978 | 3.230394 | 0.842721 | 3.833291 | 1.26E-04 | 0.006625 | Mon1a         | UP   |
| 779.4598 | -7.23169 | 1.889705 | -3.82689 | 1.30E-04 | 0.006755 | Mrpl18        | DOWN |
| 916.485  | -8.46581 | 2.211903 | -3.82739 | 1.30E-04 | 0.006755 | Zfp414        | DOWN |
| 35.78648 | -3.63438 | 0.950345 | -3.82427 | 1.31E-04 | 0.006805 | Ndufa12-ps    | DOWN |
| 1744.8   | -8.46987 | 2.217641 | -3.81931 | 1.34E-04 | 0.006858 | Apool         | DOWN |
| 2292.684 | 7.149358 | 1.870924 | 3.821297 | 1.33E-04 | 0.006858 | Ate1          | UP   |
| 2342.077 | -8.59373 | 2.250197 | -3.8191  | 1.34E-04 | 0.006858 | Cmtm7         | DOWN |
| 2953.198 | 8.549772 | 2.238406 | 3.819581 | 1.34E-04 | 0.006858 | Gm49839       | UP   |
| 2400.085 | -8.41591 | 2.205267 | -3.81628 | 1.35E-04 | 0.006867 | Aar2          | DOWN |
| 2456.217 | -7.52955 | 1.972514 | -3.81724 | 1.35E-04 | 0.006867 | Azi2          | DOWN |
| 73.74918 | -3.08047 | 0.807335 | -3.8156  | 1.36E-04 | 0.006867 | Pip4p2        | DOWN |
| 1280.44  | 8.389416 | 2.198241 | 3.816422 | 1.35E-04 | 0.006867 | Thap3         | UP   |
| 885.6287 | 9.253869 | 2.427194 | 3.812579 | 1.38E-04 | 0.006929 | Coa3          | UP   |
| 1835.958 | 7.161094 | 1.879119 | 3.810878 | 1.38E-04 | 0.006941 | Thra          | UP   |
| 814.1939 | -6.98793 | 1.833817 | -3.81059 | 1.39E-04 | 0.006941 | Usp14         | DOWN |
| 1109.314 | -8.36366 | 2.196208 | -3.80823 | 1.40E-04 | 0.006969 | Ccdc58        | DOWN |
| 252.4539 | -6.74151 | 1.770343 | -3.80803 | 1.40E-04 | 0.006969 | Cxcr4         | DOWN |
| 4211.244 | 6.436858 | 1.690725 | 3.807158 | 1.41E-04 | 0.006971 | Maged1        | UP   |
| 3325.532 | -8.04412 | 2.113717 | -3.80568 | 1.41E-04 | 0.006991 | Gpatch8       | DOWN |
| 1422.418 | -7.45737 | 1.960401 | -3.804   | 1.42E-04 | 0.007016 | Tcea3         | DOWN |

|          |          |          |          |          |          |               |      |
|----------|----------|----------|----------|----------|----------|---------------|------|
| 136.6145 | -4.46433 | 1.174429 | -3.80128 | 1.44E-04 | 0.007068 | Rer1          | DOWN |
| 1176.966 | -8.89851 | 2.341318 | -3.80064 | 1.44E-04 | 0.007068 | Rfk           | DOWN |
| 3231.04  | -7.77264 | 2.045552 | -3.79978 | 1.45E-04 | 0.00707  | Prdx4         | DOWN |
| 3061.925 | 6.504386 | 1.712586 | 3.797991 | 1.46E-04 | 0.007099 | Mrfap1        | UP   |
| 3307.514 | 8.174562 | 2.154811 | 3.793632 | 1.48E-04 | 0.007144 | E2f2          | UP   |
| 47.43233 | -2.79634 | 0.737162 | -3.79339 | 1.49E-04 | 0.007144 | Gde1          | DOWN |
| 78.07012 | -4.22124 | 1.112588 | -3.79407 | 1.48E-04 | 0.007144 | Sema3e        | DOWN |
| 4053.433 | 6.892286 | 1.81638  | 3.794519 | 1.48E-04 | 0.007144 | Tax1bp1       | UP   |
| 3397.836 | -8.10387 | 2.138116 | -3.79019 | 1.51E-04 | 0.007214 | Gfer          | DOWN |
| 1990.802 | 8.395227 | 2.216521 | 3.787568 | 1.52E-04 | 0.007229 | 3110070M22Rik | UP   |
| 1006.368 | -7.9474  | 2.098532 | -3.78712 | 1.52E-04 | 0.007229 | Enoph1        | DOWN |
| 482.2006 | -6.95636 | 1.836766 | -3.78729 | 1.52E-04 | 0.007229 | Gabarap12     | DOWN |
| 1832.233 | -8.48233 | 2.240476 | -3.78595 | 1.53E-04 | 0.007229 | Krtcap2       | DOWN |
| 2991.221 | -9.20587 | 2.431431 | -3.78619 | 1.53E-04 | 0.007229 | Rab4a         | DOWN |
| 184.0204 | -5.47361 | 1.446813 | -3.78322 | 1.55E-04 | 0.007286 | Smndc1        | DOWN |
| 6781.474 | -7.58326 | 2.006081 | -3.78014 | 1.57E-04 | 0.007355 | Tsc22d1       | DOWN |
| 691.9337 | 8.1941   | 2.168909 | 3.777983 | 1.58E-04 | 0.007397 | Gm2479        | UP   |
| 4298.974 | 8.055629 | 2.133414 | 3.775933 | 1.59E-04 | 0.007436 | Rcbtb2        | UP   |
| 782.1419 | -8.43979 | 2.237723 | -3.7716  | 1.62E-04 | 0.007455 | Cox7a2l       | DOWN |
| 38.96228 | -2.83425 | 0.752003 | -3.76893 | 1.64E-04 | 0.007455 | Ddx4          | DOWN |
| 2881.042 | 8.277948 | 2.197336 | 3.767266 | 1.65E-04 | 0.007455 | Dhrs7b        | UP   |
| 3621.388 | -7.8073  | 2.070922 | -3.76996 | 1.63E-04 | 0.007455 | Ergic1        | DOWN |
| 2015.394 | 7.226169 | 1.916002 | 3.771482 | 1.62E-04 | 0.007455 | Erlec1        | UP   |
| 1672.395 | 8.722426 | 2.314603 | 3.768433 | 1.64E-04 | 0.007455 | F2r           | UP   |
| 248.3114 | -7.38097 | 1.959154 | -3.76743 | 1.65E-04 | 0.007455 | Gm8615        | DOWN |
| 217.4591 | -5.71882 | 1.517949 | -3.76747 | 1.65E-04 | 0.007455 | H2ax          | DOWN |
| 2212.072 | 8.218048 | 2.181209 | 3.767656 | 1.65E-04 | 0.007455 | Sohlh1        | UP   |
| 1895.354 | -8.27341 | 2.194714 | -3.7697  | 1.63E-04 | 0.007455 | Tipin         | DOWN |
| 699.8269 | -7.74919 | 2.05333  | -3.77396 | 1.61E-04 | 0.007455 | Tmed4         | DOWN |
| 196.3291 | 6.126357 | 1.626528 | 3.766524 | 1.66E-04 | 0.007456 | Cyb561d2      | UP   |
| 46.53918 | -2.70571 | 0.71892  | -3.76358 | 1.67E-04 | 0.007499 | Ctdspl        | DOWN |
| 1893.256 | -8.24303 | 2.190574 | -3.76295 | 1.68E-04 | 0.007499 | Dars          | DOWN |
| 3374.983 | -8.29546 | 2.204087 | -3.76367 | 1.67E-04 | 0.007499 | Wdr6          | DOWN |
| 482.5971 | -7.56024 | 2.011228 | -3.75902 | 1.71E-04 | 0.007596 | Spdya         | DOWN |
| 81.4568  | -3.61481 | 0.962416 | -3.75597 | 1.73E-04 | 0.007668 | Slc25a5       | DOWN |
| 1524.69  | 7.194659 | 1.918492 | 3.750164 | 1.77E-04 | 0.007733 | Atxn713b      | UP   |
| 3946.057 | 6.233884 | 1.662795 | 3.74904  | 1.78E-04 | 0.007733 | Cct2          | UP   |
| 3859.567 | 6.558347 | 1.748844 | 3.750103 | 1.77E-04 | 0.007733 | Dcpla         | UP   |
| 1660.345 | 8.551077 | 2.281747 | 3.747601 | 1.79E-04 | 0.007733 | Ifi27         | UP   |
| 654.6778 | -7.72812 | 2.062031 | -3.74782 | 1.78E-04 | 0.007733 | Naa11         | DOWN |
| 1997.873 | -7.93494 | 2.115685 | -3.75053 | 1.76E-04 | 0.007733 | Nup43         | DOWN |
| 1840.307 | 6.903073 | 1.84202  | 3.747557 | 1.79E-04 | 0.007733 | Slc20a1       | UP   |
| 2716.197 | 8.036472 | 2.142718 | 3.750597 | 1.76E-04 | 0.007733 | Zfp346        | UP   |
| 2679.128 | 8.427826 | 2.248673 | 3.747911 | 1.78E-04 | 0.007733 | Zfp994        | UP   |
| 2588.361 | 8.797277 | 2.349401 | 3.744476 | 1.81E-04 | 0.007804 | Gm14137       | UP   |
| 3700.365 | -7.8845  | 2.105976 | -3.74387 | 1.81E-04 | 0.007804 | Htatsf1       | DOWN |
| 1822.985 | -8.36111 | 2.234314 | -3.74214 | 1.82E-04 | 0.007816 | Fbxo22        | DOWN |
| 2491.973 | -8.2505  | 2.204567 | -3.74246 | 1.82E-04 | 0.007816 | Nipal2        | DOWN |
| 1505.566 | 8.126824 | 2.173044 | 3.739834 | 1.84E-04 | 0.007866 | Itm2c         | UP   |
| 403.7931 | 7.24532  | 1.939238 | 3.736168 | 1.87E-04 | 0.007941 | Ifngr1        | UP   |
| 3163.043 | -7.78328 | 2.083278 | -3.73607 | 1.87E-04 | 0.007941 | Mtx2          | DOWN |
| 38.22527 | 2.555483 | 0.684293 | 3.734485 | 1.88E-04 | 0.00797  | Gm10390       | UP   |
| 5181.032 | -7.92547 | 2.126106 | -3.72769 | 1.93E-04 | 0.008096 | Alg5          | DOWN |
| 996.7216 | 8.214736 | 2.204365 | 3.726577 | 1.94E-04 | 0.008096 | Fam110c       | UP   |

|          |          |          |          |          |          |               |      |
|----------|----------|----------|----------|----------|----------|---------------|------|
| 1318.656 | 8.12502  | 2.180133 | 3.726846 | 1.94E-04 | 0.008096 | Lsm7          | UP   |
| 511.176  | 8.196809 | 2.1996   | 3.726499 | 1.94E-04 | 0.008096 | Mcee          | UP   |
| 177.9423 | -6.23057 | 1.670662 | -3.7294  | 0.000192 | 0.008096 | Mettl15       | DOWN |
| 460.2378 | 7.578593 | 2.033648 | 3.7266   | 1.94E-04 | 0.008096 | Mss51         | UP   |
| 418.1758 | -8.15034 | 2.188563 | -3.72406 | 1.96E-04 | 0.008153 | Snrpf         | DOWN |
| 85.64534 | -4.418   | 1.186793 | -3.72263 | 1.97E-04 | 0.008178 | Tdh           | DOWN |
| 1109.469 | 8.279915 | 2.224807 | 3.721632 | 1.98E-04 | 0.008188 | 6430511E19Rik | UP   |
| 4003.105 | 7.722839 | 2.07674  | 3.718732 | 2.00E-04 | 0.008261 | Hadha         | UP   |
| 1198.964 | 8.252702 | 2.222149 | 3.713839 | 2.04E-04 | 0.008401 | Gm15751       | UP   |
| 1178.445 | -8.45185 | 2.276291 | -3.71299 | 2.05E-04 | 0.008407 | Dynlrb1       | DOWN |
| 1092.555 | 8.756615 | 2.361991 | 3.707302 | 0.000209 | 0.008446 | 1700061I17Rik | UP   |
| 989.0954 | -6.77516 | 1.82616  | -3.71006 | 2.07E-04 | 0.008446 | Arf4          | DOWN |
| 3411.018 | -7.84089 | 2.115023 | -3.70724 | 2.10E-04 | 0.008446 | Klh122        | DOWN |
| 394.7541 | -6.79347 | 1.831284 | -3.70968 | 2.08E-04 | 0.008446 | Npat          | DOWN |
| 1803.956 | -8.7665  | 2.363627 | -3.70892 | 2.08E-04 | 0.008446 | Rasl10a       | DOWN |
| 1965.334 | 6.771362 | 1.825332 | 3.709661 | 2.08E-04 | 0.008446 | Rngtt         | UP   |
| 313.8633 | -5.384   | 1.452132 | -3.70765 | 2.09E-04 | 0.008446 | Snap23        | DOWN |
| 3120.804 | 7.913679 | 2.136254 | 3.704466 | 2.12E-04 | 0.008517 | Srpr          | UP   |
| 1457.257 | -6.66292 | 1.79901  | -3.70366 | 2.13E-04 | 0.008522 | Skil          | DOWN |
| 354.617  | -7.17114 | 1.938951 | -3.69847 | 2.17E-04 | 0.008567 | 4933415A04Rik | DOWN |
| 47.86852 | 3.218543 | 0.869716 | 3.700684 | 2.15E-04 | 0.008567 | Cd200         | UP   |
| 96.55654 | -4.52454 | 1.222757 | -3.70028 | 2.15E-04 | 0.008567 | Lpar1         | DOWN |
| 2715.312 | -8.27651 | 2.237485 | -3.69902 | 2.16E-04 | 0.008567 | Slc25a17      | DOWN |
| 1565.012 | 8.239408 | 2.22595  | 3.701525 | 2.14E-04 | 0.008567 | Slc50a1       | UP   |
| 463.4337 | 7.61316  | 2.057823 | 3.699619 | 2.16E-04 | 0.008567 | Tssc4         | UP   |
| 2463.249 | 8.42912  | 2.280623 | 3.695972 | 2.19E-04 | 0.008609 | Cd320         | UP   |
| 1663.349 | 7.003932 | 1.894759 | 3.696477 | 2.19E-04 | 0.008609 | Pdcd7         | UP   |
| 1820.5   | -6.57607 | 1.781192 | -3.69195 | 2.23E-04 | 0.008724 | Mest          | DOWN |
| 2166.029 | -7.78565 | 2.110421 | -3.68914 | 2.25E-04 | 0.008777 | Mettl9        | DOWN |
| 1146.647 | -6.46224 | 1.751416 | -3.68973 | 2.24E-04 | 0.008777 | Zc3hav1       | DOWN |
| 5487.077 | -7.66641 | 2.078468 | -3.68849 | 2.26E-04 | 0.008778 | Zfp292        | DOWN |
| 1542.803 | 8.293767 | 2.249846 | 3.686371 | 2.27E-04 | 0.008829 | 1700028K03Rik | UP   |
| 3352.93  | -6.55693 | 1.779376 | -3.68496 | 2.29E-04 | 0.008857 | Gnb1          | DOWN |
| 2974.525 | -7.93817 | 2.154985 | -3.68363 | 2.30E-04 | 0.008865 | Timm17b       | DOWN |
| 724.6549 | -7.34454 | 1.993929 | -3.68345 | 2.30E-04 | 0.008865 | Tusc3         | DOWN |
| 4490.218 | -6.89674 | 1.873481 | -3.68124 | 2.32E-04 | 0.008901 | Alg13         | DOWN |
| 369.0053 | 7.233299 | 1.964944 | 3.681173 | 2.32E-04 | 0.008901 | Rnf113a2      | UP   |
| 133.4964 | -4.52546 | 1.230541 | -3.67762 | 2.35E-04 | 0.009005 | Snx4          | DOWN |
| 151.5769 | 5.980434 | 1.626745 | 3.67632  | 2.37E-04 | 0.009028 | Mm2pr         | UP   |
| 224.708  | -4.87229 | 1.325589 | -3.67557 | 2.37E-04 | 0.009033 | Timmdc1       | DOWN |
| 1036.827 | -7.9685  | 2.16867  | -3.67437 | 2.38E-04 | 0.009054 | Bub1          | DOWN |
| 4416.418 | -6.66515 | 1.814926 | -3.67241 | 2.40E-04 | 0.009101 | Smc6          | DOWN |
| 5858.189 | -6.70035 | 1.825082 | -3.67126 | 2.41E-04 | 0.009121 | Srsf5         | DOWN |
| 526.0238 | 7.458188 | 2.032029 | 3.670316 | 2.42E-04 | 0.009132 | O1fr1383      | UP   |
| 42726.79 | -3.41525 | 0.930837 | -3.66901 | 2.43E-04 | 0.009157 | mt-Cytb       | DOWN |
| 1333.663 | 8.356257 | 2.280786 | 3.663762 | 2.49E-04 | 0.009236 | Ccdc181       | UP   |
| 2592.421 | -7.89701 | 2.155137 | -3.66427 | 2.48E-04 | 0.009236 | Cf12          | DOWN |
| 1231.228 | -7.97487 | 2.175429 | -3.66589 | 2.46E-04 | 0.009236 | Clbn7         | DOWN |
| 98.10449 | 3.622863 | 0.988619 | 3.664569 | 2.48E-04 | 0.009236 | Gm28439       | UP   |
| 575.5296 | -7.88314 | 2.150801 | -3.66521 | 2.47E-04 | 0.009236 | Tmem42        | DOWN |
| 1654.793 | -7.71411 | 2.105979 | -3.66296 | 2.49E-04 | 0.009244 | Ifitm1        | DOWN |
| 1297.22  | 8.375475 | 2.286986 | 3.662233 | 2.50E-04 | 0.009248 | Cdc42ep5      | UP   |
| 2360.173 | -7.54618 | 2.061536 | -3.66046 | 2.52E-04 | 0.009289 | Ddx39b        | DOWN |
| 970.6875 | -6.39987 | 1.748648 | -3.65989 | 2.52E-04 | 0.009289 | Gsk3b         | DOWN |

|          |          |          |          |          |          |               |      |
|----------|----------|----------|----------|----------|----------|---------------|------|
| 2108.246 | 8.267895 | 2.260592 | 3.657402 | 2.55E-04 | 0.009358 | Ifi35         | UP   |
| 1900.059 | 6.448074 | 1.763637 | 3.656123 | 2.56E-04 | 0.009369 | Ccdc88a       | UP   |
| 21.82752 | -3.95137 | 1.080819 | -3.6559  | 2.56E-04 | 0.009369 | Rpl21-ps7     | DOWN |
| 819.5441 | 7.717184 | 2.111264 | 3.655244 | 2.57E-04 | 0.009371 | Gm44997       | UP   |
| 2047.439 | 6.665339 | 1.824627 | 3.652988 | 2.59E-04 | 0.009432 | Wasf2         | UP   |
| 3919.986 | 7.457859 | 2.042688 | 3.651002 | 2.61E-04 | 0.009484 | Hook1         | UP   |
| 1043.037 | -7.03456 | 1.927234 | -3.65008 | 2.62E-04 | 0.009496 | Sec61g        | DOWN |
| 801.243  | -6.42966 | 1.761857 | -3.64937 | 2.63E-04 | 0.0095   | Cyca          | DOWN |
| 1296.75  | 6.563773 | 1.800959 | 3.644599 | 2.68E-04 | 0.009615 | Chordc1       | UP   |
| 28.90192 | 3.533086 | 0.969427 | 3.644511 | 2.68E-04 | 0.009615 | Gm6222        | UP   |
| 2211.7   | 6.750659 | 1.851712 | 3.645632 | 2.67E-04 | 0.009615 | Tcf712        | UP   |
| 2111.746 | -8.31086 | 2.28137  | -3.64292 | 2.70E-04 | 0.009653 | Caap1         | DOWN |
| 1311.469 | -8.12785 | 2.232141 | -3.64128 | 2.71E-04 | 0.009668 | Gm50322       | DOWN |
| 1012.418 | -8.1092  | 2.227315 | -3.6408  | 2.72E-04 | 0.009668 | Lum           | DOWN |
| 311.3479 | 6.598081 | 1.812287 | 3.640747 | 2.72E-04 | 0.009668 | Topaz1        | UP   |
| 3739.679 | 6.811487 | 1.871949 | 3.638715 | 2.74E-04 | 0.009723 | Polr2a        | UP   |
| 3624.14  | -8.25109 | 2.26955  | -3.63556 | 2.77E-04 | 0.009821 | Tmem50a       | DOWN |
| 2657.009 | 8.078167 | 2.222773 | 3.634274 | 2.79E-04 | 0.009848 | Ndufaf1       | UP   |
| 310.6396 | -6.50198 | 1.79203  | -3.62828 | 2.85E-04 | 0.010057 | Cks1b         | DOWN |
| 667.6328 | 7.34191  | 2.023976 | 3.62747  | 2.86E-04 | 0.010065 | Pycr1         | UP   |
| 2855.928 | -7.95677 | 2.196488 | -3.6225  | 2.92E-04 | 0.010238 | Ndc1          | DOWN |
| 1482.568 | -7.47208 | 2.063261 | -3.62149 | 2.93E-04 | 0.010247 | Drg1          | DOWN |
| 65.00966 | 3.453389 | 0.953681 | 3.621115 | 2.93E-04 | 0.010247 | Gps2          | UP   |
| 1015.911 | 8.091051 | 2.236044 | 3.618467 | 2.96E-04 | 0.010307 | Apold1        | UP   |
| 1237.176 | 7.961226 | 2.200147 | 3.618497 | 2.96E-04 | 0.010307 | Foxa2         | UP   |
| 1144.315 | -7.95145 | 2.197972 | -3.61763 | 2.97E-04 | 0.010317 | Irak1bp1      | DOWN |
| 20.0617  | 3.011261 | 0.832535 | 3.61698  | 2.98E-04 | 0.01032  | Olf1341       | UP   |
| 80.34267 | -3.97002 | 1.097887 | -3.61605 | 2.99E-04 | 0.010335 | Slc39a8       | DOWN |
| 1614.927 | 6.459446 | 1.787136 | 3.614413 | 3.01E-04 | 0.010355 | Map7d2        | UP   |
| 1391.007 | -6.43899 | 1.781214 | -3.61495 | 3.00E-04 | 0.010355 | Spats2        | DOWN |
| 1329.3   | 7.880798 | 2.180844 | 3.613647 | 3.02E-04 | 0.010363 | Slc25a24      | UP   |
| 50.30435 | -3.49693 | 0.967979 | -3.6126  | 3.03E-04 | 0.010382 | Zfp985        | DOWN |
| 2612.553 | -7.87617 | 2.182946 | -3.60804 | 3.09E-04 | 0.010499 | 1500011B03Rik | DOWN |
| 2106.059 | -7.86965 | 2.180716 | -3.60875 | 3.08E-04 | 0.010499 | Fbxo8         | DOWN |
| 985.5219 | 7.876371 | 2.183026 | 3.608006 | 3.09E-04 | 0.010499 | Gm38126       | UP   |
| 5165.157 | 7.82424  | 2.168949 | 3.607388 | 3.09E-04 | 0.010501 | Gabarap       | UP   |
| 644.3444 | 6.256538 | 1.735058 | 3.605954 | 3.11E-04 | 0.010532 | Fkbp14        | UP   |
| 266.6471 | -6.75766 | 1.874556 | -3.60494 | 3.12E-04 | 0.010532 | Rab4b         | DOWN |
| 1916.686 | 7.669418 | 2.127744 | 3.604484 | 3.13E-04 | 0.010532 | Susd6         | UP   |
| 303.835  | -6.41164 | 1.778836 | -3.6044  | 3.13E-04 | 0.010532 | Wdr74         | DOWN |
| 26.28849 | 3.289376 | 0.91339  | 3.601283 | 3.17E-04 | 0.010636 | Spin4         | UP   |
| 29.77909 | 3.189821 | 0.885903 | 3.600646 | 3.17E-04 | 0.01064  | Gm47026       | UP   |
| 1462.634 | -8.04616 | 2.235783 | -3.59881 | 3.20E-04 | 0.010692 | Ccnh          | DOWN |
| 1330.046 | -8.31493 | 2.313078 | -3.59475 | 3.25E-04 | 0.010814 | Cmb1          | DOWN |
| 1229.527 | -7.98271 | 2.220651 | -3.59476 | 3.25E-04 | 0.010814 | Rogdi         | DOWN |
| 44506.25 | -3.13062 | 0.871429 | -3.59251 | 3.28E-04 | 0.010884 | mt-Co1        | DOWN |
| 3136.326 | -7.4045  | 2.062643 | -3.58981 | 3.31E-04 | 0.010952 | Dus11         | DOWN |
| 92.43082 | 4.680669 | 1.303869 | 3.589832 | 3.31E-04 | 0.010952 | Lpar4         | UP   |
| 23.5794  | -2.98669 | 0.832932 | -3.58575 | 3.36E-04 | 0.0111   | Gucy2f        | DOWN |
| 555.0161 | -7.4314  | 2.073953 | -3.58321 | 3.39E-04 | 0.011162 | Aldh3a2       | DOWN |
| 983.1047 | -7.86625 | 2.195003 | -3.58371 | 3.39E-04 | 0.011162 | Gm45501       | DOWN |
| 1748.345 | -7.88751 | 2.202486 | -3.58119 | 3.42E-04 | 0.01122  | Ccdc66        | DOWN |
| 2006.205 | -7.9102  | 2.20937  | -3.5803  | 3.43E-04 | 0.01122  | Ndufa9        | DOWN |
| 4030.087 | -7.7459  | 2.163529 | -3.58021 | 3.43E-04 | 0.01122  | Tbc1d4        | DOWN |

|          |          |          |          |          |          |               |      |
|----------|----------|----------|----------|----------|----------|---------------|------|
| 819.6557 | -8.01631 | 2.239723 | -3.57915 | 3.45E-04 | 0.011242 | Enpp4         | DOWN |
| 2910.503 | 7.867801 | 2.199561 | 3.576987 | 3.48E-04 | 0.011312 | Tmem205       | UP   |
| 1370.104 | 7.966961 | 2.228154 | 3.575589 | 3.49E-04 | 0.01135  | Avp1l         | UP   |
| 2574.886 | -7.79567 | 2.181493 | -3.57355 | 3.52E-04 | 0.011415 | Sypl          | DOWN |
| 156.4561 | -5.21503 | 1.461261 | -3.56885 | 3.59E-04 | 0.011479 | Clra          | DOWN |
| 1932.528 | 7.739153 | 2.167903 | 3.56988  | 3.57E-04 | 0.011479 | Cgn1l         | UP   |
| 860.0061 | 7.44334  | 2.084117 | 3.57146  | 3.55E-04 | 0.011479 | Dolk          | UP   |
| 80.89367 | 3.683122 | 1.031437 | 3.570867 | 3.56E-04 | 0.011479 | Mitf          | UP   |
| 1999.558 | -7.2462  | 2.030204 | -3.5692  | 3.58E-04 | 0.011479 | Mrps14        | DOWN |
| 3844.286 | -7.46459 | 2.090761 | -3.57027 | 3.57E-04 | 0.011479 | Ttc14         | DOWN |
| 2503.225 | -7.62352 | 2.136653 | -3.56797 | 3.60E-04 | 0.011495 | Spc24         | DOWN |
| 90.19128 | -3.92607 | 1.100811 | -3.56652 | 3.62E-04 | 0.011526 | Eif4e3        | DOWN |
| 2910.167 | -7.68354 | 2.154545 | -3.5662  | 3.62E-04 | 0.011526 | Oxa1l         | DOWN |
| 1328.051 | 8.495807 | 2.383734 | 3.564076 | 3.65E-04 | 0.011553 | 4930513D17Rik | UP   |
| 1073.522 | -7.595   | 2.130663 | -3.56462 | 3.64E-04 | 0.011553 | Cnot6         | DOWN |
| 2231.546 | 7.985695 | 2.240654 | 3.564003 | 3.65E-04 | 0.011553 | Ubl5          | UP   |
| 1753.498 | -7.45773 | 2.093218 | -3.56281 | 3.67E-04 | 0.011582 | Mob4          | DOWN |
| 138.857  | 5.996107 | 1.684266 | 3.560072 | 3.71E-04 | 0.011652 | Gm9347        | UP   |
| 2491.15  | 7.820629 | 2.197017 | 3.559657 | 3.71E-04 | 0.011652 | Ift20         | UP   |
| 1982.522 | -8.05826 | 2.263199 | -3.56056 | 3.70E-04 | 0.011652 | Npl           | DOWN |
| 8688.706 | -5.19316 | 1.459308 | -3.55865 | 3.73E-04 | 0.011666 | B4gal1        | DOWN |
| 2571.943 | -7.79394 | 2.190367 | -3.55828 | 3.73E-04 | 0.011666 | Fkbp8         | DOWN |
| 568.5802 | 7.474122 | 2.101207 | 3.557061 | 3.75E-04 | 0.011697 | Mgp           | UP   |
| 197.4191 | -6.01167 | 1.69134  | -3.55438 | 3.79E-04 | 0.011763 | Gypc          | DOWN |
| 1291.973 | 7.961791 | 2.240209 | 3.554039 | 3.79E-04 | 0.011763 | Snapc2        | UP   |
| 689.8411 | -7.60576 | 2.139441 | -3.55502 | 3.78E-04 | 0.011763 | Thumpd2       | DOWN |
| 1718.764 | -7.58962 | 2.136231 | -3.55281 | 3.81E-04 | 0.011771 | Ap3b1         | DOWN |
| 1387.271 | -7.58079 | 2.133557 | -3.55312 | 3.81E-04 | 0.011771 | Chmpla        | DOWN |
| 784.935  | -7.3118  | 2.058836 | -3.55142 | 3.83E-04 | 0.01181  | Snx2          | DOWN |
| 1831.453 | 7.483442 | 2.108002 | 3.550016 | 3.85E-04 | 0.01185  | Ctsd          | UP   |
| 769.6933 | 6.302277 | 1.77556  | 3.549459 | 3.86E-04 | 0.011852 | Ybx2          | UP   |
| 4220.756 | 7.477615 | 2.107406 | 3.548255 | 3.88E-04 | 0.011883 | Shroom4       | UP   |
| 2681.456 | 7.840032 | 2.2105   | 3.546724 | 3.90E-04 | 0.011929 | Rabggta       | UP   |
| 1592.81  | 8.065935 | 2.274914 | 3.545599 | 3.92E-04 | 0.011957 | Zfp940        | UP   |
| 1752.589 | 6.488339 | 1.831507 | 3.542623 | 3.96E-04 | 0.011996 | Calr          | UP   |
| 2214.016 | -7.2568  | 2.048523 | -3.54245 | 3.96E-04 | 0.011996 | Eif4e         | DOWN |
| 1516.324 | -7.44564 | 2.101325 | -3.5433  | 3.95E-04 | 0.011996 | Ndufa13       | DOWN |
| 55.67023 | -2.98937 | 0.84393  | -3.5422  | 3.97E-04 | 0.011996 | Plc12         | DOWN |
| 386.8063 | -7.23932 | 2.043488 | -3.54263 | 3.96E-04 | 0.011996 | Ska2          | DOWN |
| 1528.609 | -6.40946 | 1.810678 | -3.53981 | 4.00E-04 | 0.012082 | Fubp3         | DOWN |
| 123.4141 | -4.50929 | 1.275497 | -3.53532 | 4.07E-04 | 0.012131 | Atox1         | DOWN |
| 114.7018 | 5.301216 | 1.499416 | 3.53552  | 4.07E-04 | 0.012131 | Cfap298       | UP   |
| 71.18164 | -3.62613 | 1.025155 | -3.53715 | 4.04E-04 | 0.012131 | Ct1           | DOWN |
| 62.90046 | -3.14933 | 0.890847 | -3.53521 | 4.07E-04 | 0.012131 | Sacm1l        | DOWN |
| 2362.71  | -7.99747 | 2.262192 | -3.53527 | 4.07E-04 | 0.012131 | Tsen34        | DOWN |
| 51.13083 | -2.46964 | 0.698507 | -3.5356  | 4.07E-04 | 0.012131 | Ube213        | DOWN |
| 35.87811 | 2.969218 | 0.839546 | 3.536695 | 4.05E-04 | 0.012131 | Zfp771        | UP   |
| 4199.886 | 7.614543 | 2.155084 | 3.533293 | 4.10E-04 | 0.012173 | Maged2        | UP   |
| 1293.107 | 7.906692 | 2.237718 | 3.533374 | 4.10E-04 | 0.012173 | Necap2        | UP   |
| 27.23702 | -2.62727 | 0.744511 | -3.52886 | 4.17E-04 | 0.012332 | Entpd5        | DOWN |
| 904.5859 | 7.953092 | 2.253509 | 3.529203 | 4.17E-04 | 0.012332 | Snhg12        | UP   |
| 913.9041 | -7.51267 | 2.1296   | -3.52774 | 4.19E-04 | 0.012362 | Rundc3b       | DOWN |
| 1759.093 | -7.80826 | 2.213758 | -3.52715 | 4.20E-04 | 0.012366 | Rpain         | DOWN |
| 3404.114 | 6.596218 | 1.871005 | 3.525495 | 4.23E-04 | 0.012395 | Enah          | UP   |



|          |          |          |          |          |          |               |      |
|----------|----------|----------|----------|----------|----------|---------------|------|
| 33.39175 | -2.46213 | 0.698279 | -3.526   | 4.22E-04 | 0.012395 | Fam120b       | DOWN |
| 581.4834 | 7.449776 | 2.113681 | 3.524551 | 4.24E-04 | 0.012395 | Gm48890       | UP   |
| 1054.512 | 7.751963 | 2.199282 | 3.52477  | 4.24E-04 | 0.012395 | Rab24         | UP   |
| 1330.452 | -7.73206 | 2.195533 | -3.52172 | 4.29E-04 | 0.012505 | Slc35e3       | DOWN |
| 2622.845 | 7.751748 | 2.203142 | 3.518497 | 4.34E-04 | 0.012529 | Sarm1         | UP   |
| 2279.945 | -7.31886 | 2.080008 | -3.51867 | 4.34E-04 | 0.012529 | Selenow       | DOWN |
| 2252.443 | 7.74442  | 2.200553 | 3.519306 | 4.33E-04 | 0.012529 | Stk4          | UP   |
| 3562.481 | 7.541523 | 2.142437 | 3.520067 | 4.31E-04 | 0.012529 | Ttc19         | UP   |
| 54.92975 | -2.75177 | 0.782136 | -3.51827 | 4.34E-04 | 0.012529 | Unc50         | DOWN |
| 1701.4   | -7.51502 | 2.135419 | -3.51923 | 4.33E-04 | 0.012529 | Vdac3         | DOWN |
| 1605.09  | -7.62818 | 2.169111 | -3.51673 | 4.37E-04 | 0.012575 | Cdkn2aip      | DOWN |
| 2130.828 | -6.67434 | 1.898103 | -3.51632 | 4.38E-04 | 0.012575 | Napa          | DOWN |
| 180.6066 | -4.24991 | 1.208807 | -3.51579 | 4.38E-04 | 0.012578 | Capza2        | DOWN |
| 878.0054 | 7.628283 | 2.17012  | 3.515144 | 4.40E-04 | 0.012585 | Hexim1        | UP   |
| 936.5177 | -6.34003 | 1.80455  | -3.51336 | 4.42E-04 | 0.012646 | Armc1         | DOWN |
| 149.6019 | 5.107165 | 1.453836 | 3.512889 | 4.43E-04 | 0.012646 | Slc2a4rg-ps   | UP   |
| 57.55586 | -2.50114 | 0.712427 | -3.51074 | 4.47E-04 | 0.012717 | Atg12         | DOWN |
| 2656.752 | 7.70362  | 2.194489 | 3.510439 | 4.47E-04 | 0.012717 | Marchf9       | UP   |
| 2659.164 | 8.969844 | 2.557353 | 3.507471 | 4.52E-04 | 0.012837 | Gm49745       | UP   |
| 1785.998 | 6.274768 | 1.789804 | 3.505841 | 4.55E-04 | 0.012892 | Mapk8         | UP   |
| 3571.342 | 7.447173 | 2.128267 | 3.499172 | 4.67E-04 | 0.013031 | Bgn           | UP   |
| 2017.119 | 7.605285 | 2.172989 | 3.499919 | 4.65E-04 | 0.013031 | Cpsf2         | UP   |
| 759.3894 | -7.22444 | 2.064082 | -3.50007 | 4.65E-04 | 0.013031 | Fst           | DOWN |
| 2359.864 | 7.741486 | 2.21127  | 3.500923 | 4.64E-04 | 0.013031 | Gm10638       | UP   |
| 1577.891 | -7.61372 | 2.175677 | -3.49947 | 4.66E-04 | 0.013031 | Nudt13        | DOWN |
| 618.2236 | -7.965   | 2.27616  | -3.49931 | 4.66E-04 | 0.013031 | Ormd11        | DOWN |
| 315.862  | 7.192351 | 2.05354  | 3.502415 | 4.61E-04 | 0.013031 | Polr3gl       | UP   |
| 330.0637 | -5.17886 | 1.47965  | -3.50006 | 4.65E-04 | 0.013031 | Serf2         | DOWN |
| 1983.547 | 8.185718 | 2.340709 | 3.497111 | 4.70E-04 | 0.013069 | Dnajc24       | UP   |
| 22.43816 | -3.10634 | 0.88829  | -3.49699 | 4.71E-04 | 0.013069 | Gm7292        | DOWN |
| 3280.859 | -7.06075 | 2.018787 | -3.49752 | 4.70E-04 | 0.013069 | Zcrb1         | DOWN |
| 1901.509 | 7.746528 | 2.21692  | 3.494275 | 4.75E-04 | 0.013179 | Clpx          | UP   |
| 1394.999 | -7.69673 | 2.203787 | -3.4925  | 4.79E-04 | 0.013233 | Hormad2       | DOWN |
| 3095.032 | 7.802888 | 2.23435  | 3.49224  | 4.79E-04 | 0.013233 | Phkb          | UP   |
| 350.8473 | 6.849507 | 1.962438 | 3.490305 | 4.82E-04 | 0.013285 | Enpp5         | UP   |
| 1992.525 | -7.50128 | 2.149211 | -3.49025 | 4.83E-04 | 0.013285 | Selenof       | DOWN |
| 1547.868 | -7.86587 | 2.253991 | -3.48975 | 4.83E-04 | 0.013287 | Pbk           | DOWN |
| 3000.67  | -6.75999 | 1.937408 | -3.48919 | 4.84E-04 | 0.013292 | Atp5c1        | DOWN |
| 142.7641 | 5.097302 | 1.462588 | 3.485126 | 4.92E-04 | 0.013425 | Gm45205       | UP   |
| 75.73623 | -4.41143 | 1.265705 | -3.48535 | 4.91E-04 | 0.013425 | Pdgfr1        | DOWN |
| 854.424  | -7.19732 | 2.06461  | -3.48604 | 4.90E-04 | 0.013425 | Ywhaq         | DOWN |
| 2581.213 | -6.11591 | 1.755496 | -3.48387 | 4.94E-04 | 0.013442 | Brd4          | DOWN |
| 2872.378 | -7.54811 | 2.166576 | -3.48389 | 4.94E-04 | 0.013442 | Dnajc5        | DOWN |
| 462.4133 | 6.931734 | 1.991059 | 3.48143  | 4.99E-04 | 0.013541 | Ccdc105       | UP   |
| 165.9629 | -4.42424 | 1.271724 | -3.47893 | 5.03E-04 | 0.013644 | Ap3s1         | DOWN |
| 1327.04  | -6.99221 | 2.011852 | -3.47551 | 5.10E-04 | 0.013736 | 4833439L19Rik | DOWN |
| 1001.287 | 7.756631 | 2.231456 | 3.476041 | 5.09E-04 | 0.013736 | Ces2f         | UP   |
| 2327.346 | -7.35965 | 2.117709 | -3.47529 | 5.10E-04 | 0.013736 | Gpt2          | DOWN |
| 1263.343 | 7.766099 | 2.234466 | 3.475595 | 5.10E-04 | 0.013736 | Gstm7         | UP   |
| 2345.237 | -7.54022 | 2.170891 | -3.47333 | 5.14E-04 | 0.013813 | Atf4          | DOWN |
| 5666.817 | -5.96494 | 1.717637 | -3.47276 | 5.15E-04 | 0.013819 | Nop56         | DOWN |
| 1421.805 | 7.551892 | 2.175516 | 3.471311 | 5.18E-04 | 0.013823 | Gtf2f1        | UP   |
| 2670.633 | -7.73116 | 2.227068 | -3.47145 | 5.18E-04 | 0.013823 | Ppih          | DOWN |
| 1234.445 | 7.517562 | 2.16538  | 3.471706 | 5.17E-04 | 0.013823 | Snrnp25       | UP   |

|          |          |          |          |          |          |               |      |
|----------|----------|----------|----------|----------|----------|---------------|------|
| 3594.071 | 7.183934 | 2.070109 | 3.470317 | 5.20E-04 | 0.013827 | Plcg2         | UP   |
| 200.4157 | -5.70009 | 1.642319 | -3.47076 | 5.19E-04 | 0.013827 | Thoc1         | DOWN |
| 1951.07  | 7.93877  | 2.288448 | 3.469063 | 5.22E-04 | 0.013869 | Ddx28         | UP   |
| 2505.629 | 7.457768 | 2.150312 | 3.468226 | 5.24E-04 | 0.013888 | Itga4         | UP   |
| 209.4358 | 6.589984 | 1.900374 | 3.467731 | 5.25E-04 | 0.013891 | Pctp          | UP   |
| 2822.507 | -7.4805  | 2.15776  | -3.46679 | 5.27E-04 | 0.013916 | Cpsf6         | DOWN |
| 2414.759 | 7.64383  | 2.205743 | 3.465421 | 5.29E-04 | 0.013963 | Ttc27         | UP   |
| 17.2719  | -3.41908 | 0.987194 | -3.46344 | 5.33E-04 | 0.013996 | Gm8355        | DOWN |
| 24.17    | 2.67416  | 0.772088 | 3.463543 | 5.33E-04 | 0.013996 | Olfr54        | UP   |
| 511.7722 | 5.90177  | 1.703908 | 3.463667 | 5.33E-04 | 0.013996 | Ppp2r3c       | UP   |
| 25.35692 | -3.54262 | 1.023033 | -3.46286 | 5.34E-04 | 0.014001 | Bnip3         | DOWN |
| 795.66   | -7.35192 | 2.123327 | -3.46245 | 5.35E-04 | 0.014001 | Otud6b        | DOWN |
| 5817.728 | -7.10845 | 2.0541   | -3.46062 | 5.39E-04 | 0.014073 | Eeal          | DOWN |
| 4855.223 | -6.2195  | 1.797646 | -3.4598  | 5.41E-04 | 0.014092 | Psma3         | DOWN |
| 146.87   | 4.927529 | 1.424792 | 3.458419 | 5.43E-04 | 0.014142 | Atxn3         | UP   |
| 2372.585 | 7.832158 | 2.265628 | 3.456948 | 5.46E-04 | 0.014196 | Crabp1        | UP   |
| 1978.068 | 7.710277 | 2.232792 | 3.4532   | 5.54E-04 | 0.014371 | Wwtr1         | UP   |
| 329.0919 | 7.458067 | 2.160052 | 3.452726 | 5.55E-04 | 0.014371 | Gm16573       | UP   |
| 1078.055 | -6.15728 | 1.783541 | -3.45228 | 5.56E-04 | 0.014371 | Lonrf2        | DOWN |
| 10194.61 | 4.895843 | 1.418319 | 3.451864 | 5.57E-04 | 0.014371 | Qrich1        | UP   |
| 52.72599 | -2.81151 | 0.814809 | -3.45052 | 5.60E-04 | 0.014419 | Trnt1         | DOWN |
| 78.84614 | -3.81004 | 1.104607 | -3.44923 | 5.62E-04 | 0.01443  | Gm15772       | DOWN |
| 317.8516 | 6.056357 | 1.755577 | 3.449782 | 5.61E-04 | 0.01443  | Taf15         | UP   |
| 1765.367 | 7.849078 | 2.275768 | 3.44898  | 5.63E-04 | 0.01443  | Tmem39b       | UP   |
| 1700.778 | 7.442468 | 2.158894 | 3.447352 | 5.66E-04 | 0.014444 | Fntb          | UP   |
| 783.4616 | -7.55932 | 2.193604 | -3.44608 | 5.69E-04 | 0.014444 | Mkrn3         | DOWN |
| 2122.174 | 7.526606 | 2.184373 | 3.44566  | 5.70E-04 | 0.014444 | Mtmr1         | UP   |
| 1533.452 | 6.909617 | 2.005071 | 3.446071 | 5.69E-04 | 0.014444 | Prpf4         | UP   |
| 894.4468 | 6.836985 | 1.983264 | 3.44734  | 5.66E-04 | 0.014444 | Rab12         | UP   |
| 2778.072 | -7.4481  | 2.161139 | -3.44638 | 5.68E-04 | 0.014444 | Stn1          | DOWN |
| 1424.304 | -6.87256 | 1.993169 | -3.44806 | 5.65E-04 | 0.014444 | Zfand6        | DOWN |
| 3166.351 | 8.119206 | 2.357831 | 3.443506 | 5.74E-04 | 0.014513 | Ctxn1         | UP   |
| 885.1306 | -7.25448 | 2.106448 | -3.44394 | 5.73E-04 | 0.014513 | Pdia4         | DOWN |
| 3534.176 | 7.111795 | 2.066645 | 3.441227 | 5.79E-04 | 0.014612 | Dnajc21       | UP   |
| 1698.611 | 7.382783 | 2.145804 | 3.440568 | 5.80E-04 | 0.014624 | Foxk2         | UP   |
| 2070.066 | -7.70816 | 2.242434 | -3.43741 | 5.87E-04 | 0.014749 | Rps6kb1       | DOWN |
| 348.261  | -5.13329 | 1.493364 | -3.4374  | 5.87E-04 | 0.014749 | Twf1          | DOWN |
| 39.06716 | -2.30196 | 0.669845 | -3.43655 | 5.89E-04 | 0.014772 | Gemin7        | DOWN |
| 288.7102 | -5.85056 | 1.703658 | -3.43412 | 5.94E-04 | 0.014787 | Abhd17b       | DOWN |
| 214.126  | -5.86078 | 1.706354 | -3.43468 | 5.93E-04 | 0.014787 | Gm32123       | DOWN |
| 20.80126 | -3.61474 | 1.052379 | -3.43483 | 5.93E-04 | 0.014787 | Gm9294        | DOWN |
| 431.1953 | -6.39607 | 1.862482 | -3.43417 | 5.94E-04 | 0.014787 | Mpc1          | DOWN |
| 2707.125 | 7.29096  | 2.122362 | 3.435305 | 5.92E-04 | 0.014787 | Scaper        | UP   |
| 4278.789 | -7.21094 | 2.100186 | -3.43348 | 5.96E-04 | 0.014798 | Pttg1         | DOWN |
| 2290.302 | 7.490353 | 2.182555 | 3.43192  | 5.99E-04 | 0.01486  | Bag4          | UP   |
| 51.44661 | -2.81563 | 0.820637 | -3.43103 | 6.01E-04 | 0.014885 | Fam162a       | DOWN |
| 3094.461 | 7.510086 | 2.189251 | 3.430437 | 6.03E-04 | 0.014895 | Eloa          | UP   |
| 18.13727 | -3.56825 | 1.040426 | -3.4296  | 6.04E-04 | 0.014917 | 2700078F05Rik | DOWN |
| 1380.905 | -7.51173 | 2.190782 | -3.42879 | 6.06E-04 | 0.014939 | Gdap2         | DOWN |
| 77.76771 | -3.82644 | 1.116544 | -3.42704 | 6.10E-04 | 0.014988 | Nek2          | DOWN |
| 1165.744 | 7.837515 | 2.28683  | 3.42724  | 6.10E-04 | 0.014988 | Zfp830        | UP   |
| 1600.853 | 7.429067 | 2.169545 | 3.424251 | 6.16E-04 | 0.015119 | Dhx8          | UP   |
| 1663.687 | 7.386499 | 2.157556 | 3.42355  | 6.18E-04 | 0.015135 | Spcs1         | UP   |
| 538.0639 | -6.53164 | 1.908495 | -3.4224  | 6.21E-04 | 0.015175 | Nup37         | DOWN |

|          |          |          |          |          |          |               |      |
|----------|----------|----------|----------|----------|----------|---------------|------|
| 1010.238 | 7.645842 | 2.235382 | 3.420374 | 6.25E-04 | 0.015265 | Prss35        | UP   |
| 620.2775 | -7.11821 | 2.082033 | -3.41887 | 6.29E-04 | 0.015303 | Cmc4          | DOWN |
| 1461.809 | -7.651   | 2.23789  | -3.41885 | 6.29E-04 | 0.015303 | Mettl25       | DOWN |
| 1750.44  | 7.590695 | 2.22101  | 3.417677 | 6.32E-04 | 0.015345 | Paf1          | UP   |
| 852.6433 | -7.18409 | 2.103766 | -3.41487 | 6.38E-04 | 0.015456 | Arrdc4        | DOWN |
| 1646.45  | -7.86462 | 2.303027 | -3.41491 | 6.38E-04 | 0.015456 | Mis18a        | DOWN |
| 803.3813 | -7.56012 | 2.215194 | -3.41285 | 6.43E-04 | 0.015463 | 1700013H16Rik | DOWN |
| 929.5963 | -7.25237 | 2.125137 | -3.41266 | 6.43E-04 | 0.015463 | D130040H23Rik | DOWN |
| 208.6745 | -5.76036 | 1.68732  | -3.41391 | 6.40E-04 | 0.015463 | I133          | DOWN |
| 13.40037 | 3.83728  | 1.123964 | 3.414059 | 6.40E-04 | 0.015463 | Nfkbid        | UP   |
| 506.5703 | -7.0609  | 2.06892  | -3.41284 | 6.43E-04 | 0.015463 | Rpa3          | DOWN |
| 190.0913 | -5.70401 | 1.671661 | -3.41218 | 6.44E-04 | 0.015467 | Mrpl22        | DOWN |
| 19.03108 | 2.943233 | 0.862722 | 3.411567 | 6.46E-04 | 0.015478 | Urod          | UP   |
| 6637.812 | -5.56941 | 1.633564 | -3.40936 | 6.51E-04 | 0.01558  | Dynl11        | DOWN |
| 1834.363 | -7.60408 | 2.230894 | -3.40854 | 6.53E-04 | 0.015603 | Stxl1b        | DOWN |
| 1553.901 | 6.114183 | 1.794446 | 3.407282 | 6.56E-04 | 0.015628 | Srrt          | UP   |
| 3013.198 | -7.27626 | 2.135314 | -3.40758 | 6.55E-04 | 0.015628 | Ube2o         | DOWN |
| 1840.074 | -7.90729 | 2.322918 | -3.40403 | 6.64E-04 | 0.015671 | 1500009L16Rik | DOWN |
| 2327.779 | 5.949846 | 1.747399 | 3.404973 | 6.62E-04 | 0.015671 | Arid4b        | UP   |
| 28.47484 | -2.42736 | 0.7131   | -3.40396 | 6.64E-04 | 0.015671 | Cc2d2a        | DOWN |
| 123.0268 | -5.45937 | 1.603805 | -3.40401 | 6.64E-04 | 0.015671 | Gm4864        | DOWN |
| 1221.025 | -7.52962 | 2.212222 | -3.40364 | 6.65E-04 | 0.015671 | Maip1         | DOWN |
| 1294.511 | -7.32109 | 2.150036 | -3.4051  | 6.61E-04 | 0.015671 | Papss1        | DOWN |
| 27.76089 | -2.754   | 0.808689 | -3.40551 | 6.60E-04 | 0.015671 | Tmem183a      | DOWN |
| 1718.703 | 7.978314 | 2.344766 | 3.402605 | 6.67E-04 | 0.015707 | Arf2          | UP   |
| 633.8511 | -6.53291 | 1.922312 | -3.39847 | 6.78E-04 | 0.015923 | Gcsh          | DOWN |
| 1886.755 | 7.71155  | 2.269937 | 3.397253 | 6.81E-04 | 0.015946 | Mrps7         | UP   |
| 1432.849 | 6.05068  | 1.780842 | 3.397651 | 6.80E-04 | 0.015946 | Neur14        | UP   |
| 327.0077 | -5.01894 | 1.478191 | -3.39533 | 6.85E-04 | 0.015998 | Arhgap44      | DOWN |
| 3582.95  | 7.137543 | 2.10195  | 3.395677 | 6.85E-04 | 0.015998 | Myo18b        | UP   |
| 1233.923 | -6.59073 | 1.94122  | -3.39515 | 6.86E-04 | 0.015998 | Pmf1          | DOWN |
| 1390.171 | 7.791776 | 2.295918 | 3.393751 | 6.89E-04 | 0.016054 | Cryl1         | UP   |
| 1231.396 | -6.99275 | 2.060708 | -3.39337 | 6.90E-04 | 0.016054 | Ube2c         | DOWN |
| 2558.256 | 7.352181 | 2.167579 | 3.391887 | 6.94E-04 | 0.016118 | Cachd1        | UP   |
| 3914.045 | -7.31519 | 2.157466 | -3.39064 | 6.97E-04 | 0.016167 | Sdhaf2        | DOWN |
| 2526.292 | -7.24484 | 2.136979 | -3.39023 | 6.98E-04 | 0.016168 | Yipf1         | DOWN |
| 40.49297 | -3.22597 | 0.951766 | -3.38946 | 7.00E-04 | 0.016189 | Ipp           | DOWN |
| 1363.034 | 7.574915 | 2.235594 | 3.388323 | 7.03E-04 | 0.016201 | Nsg1          | UP   |
| 56.08029 | -2.70472 | 0.798293 | -3.38812 | 7.04E-04 | 0.016201 | Psmc6         | DOWN |
| 455.8977 | -6.7268  | 1.985444 | -3.38806 | 7.04E-04 | 0.016201 | Rbmx11        | DOWN |
| 2142.386 | -7.43614 | 2.197082 | -3.38455 | 7.13E-04 | 0.016243 | Cdk9          | DOWN |
| 29.14089 | -2.72879 | 0.80625  | -3.38454 | 7.13E-04 | 0.016243 | Gm10029       | DOWN |
| 19.60446 | 3.113443 | 0.919412 | 3.386341 | 7.08E-04 | 0.016243 | Gm5069        | UP   |
| 242.6991 | 5.765381 | 1.703022 | 3.385382 | 7.11E-04 | 0.016243 | Myl12b        | UP   |
| 854.4621 | -7.14505 | 2.110603 | -3.38531 | 7.11E-04 | 0.016243 | Pdha1         | DOWN |
| 2311.562 | 7.366609 | 2.175621 | 3.38598  | 7.09E-04 | 0.016243 | Sharnpin      | UP   |
| 338.3818 | -5.41357 | 1.599087 | -3.38541 | 7.11E-04 | 0.016243 | Snx3          | DOWN |
| 324.8446 | 6.552805 | 1.937475 | 3.382136 | 7.19E-04 | 0.016273 | Gm47208       | UP   |
| 31.06462 | -2.62556 | 0.77631  | -3.38211 | 7.19E-04 | 0.016273 | Msx1          | DOWN |
| 2942.252 | 6.463419 | 1.91078  | 3.382608 | 7.18E-04 | 0.016273 | Pum3          | UP   |
| 610.3271 | -7.1062  | 2.101146 | -3.38206 | 7.19E-04 | 0.016273 | Tmem230       | DOWN |
| 137.5129 | 4.259376 | 1.258898 | 3.383416 | 7.16E-04 | 0.016273 | Usf2          | UP   |
| 83.83608 | -3.5024  | 1.036097 | -3.38038 | 7.24E-04 | 0.016349 | Atp13a1       | DOWN |
| 761.709  | -7.72559 | 2.28639  | -3.37895 | 7.28E-04 | 0.016411 | Lhfp          | DOWN |

|          |          |          |          |          |          |          |      |
|----------|----------|----------|----------|----------|----------|----------|------|
| 1196.538 | 7.108823 | 2.104701 | 3.377593 | 7.31E-04 | 0.016435 | Pcmttd1  | UP   |
| 3370.649 | 7.062178 | 2.091034 | 3.377362 | 7.32E-04 | 0.016435 | Psd3     | UP   |
| 1483.576 | -7.35712 | 2.178301 | -3.37746 | 7.32E-04 | 0.016435 | Tent2    | DOWN |
| 405.6204 | -6.30111 | 1.865982 | -3.37683 | 7.33E-04 | 0.016443 | Ddc      | DOWN |
| 1748.971 | -6.77965 | 2.009214 | -3.37428 | 7.40E-04 | 0.01655  | Topors   | DOWN |
| 2155.054 | 7.386833 | 2.189085 | 3.374393 | 7.40E-04 | 0.01655  | Zcchc7   | UP   |
| 105.3427 | 4.8178   | 1.428035 | 3.373726 | 7.42E-04 | 0.016559 | Gm45885  | UP   |
| 203.7095 | -5.69046 | 1.688415 | -3.3703  | 7.51E-04 | 0.01669  | Actr5    | DOWN |
| 950.9445 | -6.08837 | 1.806063 | -3.37107 | 7.49E-04 | 0.01669  | Klf13    | DOWN |
| 2782.862 | -7.73703 | 2.295862 | -3.36999 | 7.52E-04 | 0.01669  | Mecr     | DOWN |
| 474.4131 | 6.97187  | 2.068521 | 3.370462 | 7.50E-04 | 0.01669  | Star     | UP   |
| 1458.392 | 7.128244 | 2.115461 | 3.369593 | 7.53E-04 | 0.016691 | Adamts13 | UP   |
| 2197.788 | -7.42642 | 2.204486 | -3.36878 | 7.55E-04 | 0.016717 | Polr3b   | DOWN |
| 1447.442 | 7.985254 | 2.370839 | 3.368113 | 7.57E-04 | 0.016734 | Casq2    | UP   |
| 1956.81  | 7.231681 | 2.147642 | 3.367266 | 7.59E-04 | 0.016762 | Tbcd     | UP   |
| 2532.338 | -7.3628  | 2.187647 | -3.36562 | 7.64E-04 | 0.016823 | Mrpl13   | DOWN |
| 3917.62  | 7.087461 | 2.105922 | 3.36549  | 7.64E-04 | 0.016823 | Plaa     | UP   |
| 307.3711 | 6.242703 | 1.855947 | 3.363621 | 7.69E-04 | 0.016913 | Gtf3c6   | UP   |
| 1680.168 | 7.534268 | 2.241023 | 3.361977 | 7.74E-04 | 0.01699  | Exoc3    | UP   |
| 197.4264 | 5.116325 | 1.522343 | 3.360823 | 7.77E-04 | 0.017016 | Inf2     | UP   |
| 2403.749 | -6.98044 | 2.077021 | -3.36079 | 7.77E-04 | 0.017016 | Sccpdh   | DOWN |
| 2434.645 | 7.406976 | 2.204546 | 3.359865 | 7.80E-04 | 0.017034 | Gtf3c5   | UP   |
| 423.2613 | -6.37364 | 1.897067 | -3.35973 | 7.80E-04 | 0.017034 | Nusap1   | DOWN |
| 981.9702 | -7.00559 | 2.086582 | -3.35745 | 7.87E-04 | 0.017151 | Ywhah    | DOWN |
| 1444.271 | 7.207381 | 2.14741  | 3.356313 | 7.90E-04 | 0.017198 | Pja2     | UP   |
| 1303.433 | 7.338342 | 2.18692  | 3.35556  | 7.92E-04 | 0.017221 | Snx24    | UP   |
| 2397.686 | 6.469192 | 1.92818  | 3.355076 | 7.93E-04 | 0.017228 | Sympk    | UP   |
| 1399.283 | 5.920961 | 1.765412 | 3.353869 | 7.97E-04 | 0.017279 | Socs6    | UP   |
| 36.89421 | 2.766886 | 0.825448 | 3.351981 | 8.02E-04 | 0.017373 | Rpsa-ps9 | UP   |
| 1102.71  | 7.081993 | 2.113626 | 3.350636 | 8.06E-04 | 0.017425 | Pard6b   | UP   |
| 1972.147 | 7.13401  | 2.129647 | 3.349856 | 8.09E-04 | 0.017425 | Psm3     | UP   |
| 268.499  | -6.92781 | 2.067995 | -3.35001 | 8.08E-04 | 0.017425 | Rarres2  | DOWN |
| 350.1647 | 5.916379 | 1.766271 | 3.349644 | 8.09E-04 | 0.017425 | Thsd1    | UP   |
| 25.19458 | -2.49525 | 0.745021 | -3.34924 | 8.10E-04 | 0.017426 | Dync11i1 | DOWN |
| 140.11   | 4.718397 | 1.409092 | 3.348537 | 8.12E-04 | 0.017447 | AI837181 | UP   |
| 4455.364 | -6.68758 | 1.997898 | -3.34731 | 8.16E-04 | 0.017486 | Hectd4   | DOWN |
| 1507.24  | 7.224329 | 2.159022 | 3.346112 | 8.20E-04 | 0.017486 | Map3k11  | UP   |
| 2927.448 | 6.991456 | 2.089485 | 3.346019 | 8.20E-04 | 0.017486 | Nphp4    | UP   |
| 318.2173 | 6.899458 | 2.061878 | 3.3462   | 8.19E-04 | 0.017486 | Tagln    | UP   |
| 278.9267 | 5.982    | 1.787394 | 3.346772 | 8.18E-04 | 0.017486 | Trp53rka | UP   |
| 1239.585 | 6.978671 | 2.086442 | 3.344771 | 8.24E-04 | 0.017541 | Gabre    | UP   |
| 1005.751 | -7.10206 | 2.123849 | -3.34396 | 8.26E-04 | 0.017558 | Cept1    | DOWN |
| 21.56779 | -3.47358 | 1.038839 | -3.34371 | 8.27E-04 | 0.017558 | Gm13680  | DOWN |
| 645.5994 | 6.913397 | 2.067787 | 3.343379 | 8.28E-04 | 0.017558 | Gpr162   | UP   |
| 1460.832 | 7.177138 | 2.147662 | 3.341837 | 8.32E-04 | 0.01757  | Ano10    | UP   |
| 2122.028 | 7.329301 | 2.19475  | 3.33947  | 8.39E-04 | 0.01757  | Exoc7    | UP   |
| 708.8416 | -6.85804 | 2.052669 | -3.34104 | 8.35E-04 | 0.01757  | Fam107b  | DOWN |
| 2422.561 | 7.267971 | 2.176283 | 3.339625 | 8.39E-04 | 0.01757  | Hmmr     | UP   |
| 1830.631 | -6.91315 | 2.069592 | -3.34035 | 8.37E-04 | 0.01757  | Larp4    | DOWN |
| 307.5949 | -5.51114 | 1.650114 | -3.33985 | 8.38E-04 | 0.01757  | Mindy3   | DOWN |
| 1607.965 | -7.2351  | 2.16515  | -3.34162 | 8.33E-04 | 0.01757  | Nfyc     | DOWN |
| 146.8096 | -4.37316 | 1.308899 | -3.3411  | 8.34E-04 | 0.01757  | Sap30    | DOWN |
| 429.4739 | 6.760375 | 2.024227 | 3.339732 | 8.39E-04 | 0.01757  | St3gal5  | UP   |
| 605.0066 | 7.145318 | 2.137604 | 3.342676 | 8.30E-04 | 0.01757  | Tmem11   | UP   |

|          |          |          |          |          |          |               |      |
|----------|----------|----------|----------|----------|----------|---------------|------|
| 247.4752 | -6.62441 | 1.985834 | -3.33583 | 8.50E-04 | 0.017754 | Gm26850       | DOWN |
| 2315.707 | -5.98175 | 1.793101 | -3.33598 | 8.50E-04 | 0.017754 | Sall4         | DOWN |
| 1597.67  | 7.508671 | 2.251591 | 3.334829 | 8.54E-04 | 0.017795 | C330018D20Rik | UP   |
| 96.00368 | 3.956778 | 1.186781 | 3.334043 | 8.56E-04 | 0.017822 | I700008J07Rik | UP   |
| 628.4837 | 5.961436 | 1.788981 | 3.332308 | 8.61E-04 | 0.017909 | Leo1          | UP   |
| 1155.416 | 7.014007 | 2.105354 | 3.33151  | 8.64E-04 | 0.017937 | Lmbr1         | UP   |
| 35.45186 | -2.99052 | 0.897894 | -3.33059 | 8.67E-04 | 0.017973 | Pradc1        | DOWN |
| 992.373  | 5.946865 | 1.78596  | 3.329786 | 8.69E-04 | 0.017986 | Otub1         | UP   |
| 29.85349 | -2.94595 | 0.884763 | -3.32965 | 8.70E-04 | 0.017986 | Tmem256       | DOWN |
| 2449.695 | 7.261973 | 2.182027 | 3.328085 | 8.74E-04 | 0.018021 | Cpeb3         | UP   |
| 1768.587 | 7.171377 | 2.154851 | 3.328016 | 8.75E-04 | 0.018021 | Elof1         | UP   |
| 697.8558 | -5.79904 | 1.742148 | -3.32867 | 8.73E-04 | 0.018021 | Scpep1        | DOWN |
| 3863.94  | -7.15162 | 2.149533 | -3.32706 | 8.78E-04 | 0.018059 | Senp3         | DOWN |
| 112.5068 | -3.97992 | 1.196622 | -3.32596 | 8.81E-04 | 0.018083 | Dars2         | DOWN |
| 97.87599 | 3.76476  | 1.131884 | 3.3261   | 8.81E-04 | 0.018083 | Elk1          | UP   |
| 383.3306 | 6.029415 | 1.81308  | 3.32551  | 8.83E-04 | 0.018089 | Junb          | UP   |
| 282.4039 | -5.47045 | 1.645603 | -3.32428 | 8.86E-04 | 0.018138 | Cnot2         | DOWN |
| 2510.385 | -7.30583 | 2.197901 | -3.324   | 8.87E-04 | 0.018138 | Impdh1        | DOWN |
| 1442.898 | -7.22244 | 2.173651 | -3.32272 | 8.91E-04 | 0.018138 | Sae1          | DOWN |
| 685.6989 | -7.18763 | 2.163092 | -3.32285 | 8.91E-04 | 0.018138 | Sdc2          | DOWN |
| 3528.458 | 7.084068 | 2.131872 | 3.322933 | 8.91E-04 | 0.018138 | Usp16         | UP   |
| 2504.472 | 7.06977  | 2.127794 | 3.322581 | 8.92E-04 | 0.018138 | Usp32         | UP   |
| 467.7402 | 6.351167 | 1.912428 | 3.320996 | 8.97E-04 | 0.018171 | Cmss1         | UP   |
| 872.7096 | -7.23717 | 2.179196 | -3.32103 | 8.97E-04 | 0.018171 | Cnpy2         | DOWN |
| 912.5042 | -6.73651 | 2.02818  | -3.32146 | 8.95E-04 | 0.018171 | Magoh         | DOWN |
| 1183.757 | -6.97843 | 2.102703 | -3.31879 | 9.04E-04 | 0.018223 | Crbn          | DOWN |
| 4159.981 | 5.779675 | 1.741221 | 3.319323 | 9.02E-04 | 0.018223 | Dnmt1         | UP   |
| 13.59713 | 3.901971 | 1.175812 | 3.318534 | 9.05E-04 | 0.018223 | Gm42717       | UP   |
| 623.4303 | -6.97746 | 2.102808 | -3.31816 | 9.06E-04 | 0.018223 | Gm42979       | DOWN |
| 41.5529  | -2.62625 | 0.791508 | -3.31803 | 9.07E-04 | 0.018223 | Rpl2211       | DOWN |
| 728.3615 | 7.277978 | 2.192648 | 3.319264 | 9.03E-04 | 0.018223 | Tmem242       | UP   |
| 1567.302 | -7.10532 | 2.14247  | -3.31642 | 9.12E-04 | 0.018306 | Dusp11        | DOWN |
| 1459.334 | 6.798332 | 2.051428 | 3.31395  | 9.20E-04 | 0.018361 | Ezh1          | UP   |
| 266.5782 | -5.87458 | 1.772762 | -3.3138  | 9.20E-04 | 0.018361 | Jam3          | DOWN |
| 380.4923 | -5.99007 | 1.807324 | -3.31433 | 9.19E-04 | 0.018361 | Lars          | DOWN |
| 38.20121 | -2.25168 | 0.67935  | -3.31447 | 9.18E-04 | 0.018361 | Orc1          | DOWN |
| 89.52356 | -4.62817 | 1.396561 | -3.31398 | 9.20E-04 | 0.018361 | Rpl3-ps2      | DOWN |
| 1276.252 | 7.415111 | 2.238239 | 3.312922 | 9.23E-04 | 0.018395 | 3110009E18Rik | UP   |
| 131.9209 | -4.75206 | 1.436169 | -3.30884 | 0.000937 | 0.018642 | Tubala        | DOWN |
| 2970.295 | 7.081566 | 2.141184 | 3.307313 | 9.42E-04 | 0.018696 | Natd1         | UP   |
| 2062.945 | -7.32822 | 2.21555  | -3.30763 | 9.41E-04 | 0.018696 | Tchp          | DOWN |
| 36.95241 | -3.15221 | 0.953256 | -3.30678 | 9.44E-04 | 0.018708 | Aasdhppt      | DOWN |
| 83.10984 | -3.2953  | 0.997023 | -3.30514 | 9.49E-04 | 0.018747 | Pnrc1         | DOWN |
| 2853.139 | -7.15115 | 2.16352  | -3.30533 | 9.49E-04 | 0.018747 | Tpml          | DOWN |
| 307.1063 | 5.664996 | 1.713818 | 3.305482 | 9.48E-04 | 0.018747 | Zswim5        | UP   |
| 72.40291 | 3.02891  | 0.916938 | 3.303289 | 9.56E-04 | 0.018848 | Pdp2          | UP   |
| 697.2341 | 7.201137 | 2.180447 | 3.302596 | 9.58E-04 | 0.018871 | Slc35d3       | UP   |
| 1094.619 | 7.206832 | 2.182973 | 3.301384 | 9.62E-04 | 0.018881 | Gm45555       | UP   |
| 342.3564 | 6.367452 | 1.928659 | 3.301492 | 9.62E-04 | 0.018881 | Nat9          | UP   |
| 24.99956 | 2.652133 | 0.803309 | 3.30151  | 9.62E-04 | 0.018881 | Zfp229        | UP   |
| 1471.769 | 7.133218 | 2.161258 | 3.300494 | 9.65E-04 | 0.018918 | Postn         | UP   |
| 2464.465 | -7.08609 | 2.149495 | -3.29663 | 9.79E-04 | 0.019091 | Fto           | DOWN |
| 15.49248 | 3.41414  | 1.035675 | 3.296535 | 9.79E-04 | 0.019091 | Gm33677       | UP   |
| 116.8407 | -4.59922 | 1.394945 | -3.29706 | 9.77E-04 | 0.019091 | Rbbp9         | DOWN |

|          |          |          |          |          |          |               |      |
|----------|----------|----------|----------|----------|----------|---------------|------|
| 63.26989 | 3.196696 | 0.969512 | 3.297222 | 9.76E-04 | 0.019091 | Slc6a20b      | UP   |
| 4009.596 | 6.937979 | 2.105517 | 3.295143 | 9.84E-04 | 0.019109 | Atp2b4        | UP   |
| 1432.444 | 7.641133 | 2.319093 | 3.29488  | 9.85E-04 | 0.019109 | Gm37183       | UP   |
| 5389.131 | 6.915979 | 2.098485 | 3.295701 | 9.82E-04 | 0.019109 | Larp4b        | UP   |
| 2774.296 | 7.060901 | 2.142895 | 3.295029 | 9.84E-04 | 0.019109 | Pik3r1        | UP   |
| 1205.484 | 7.200947 | 2.187021 | 3.292582 | 9.93E-04 | 0.019237 | 4632427E13Rik | UP   |
| 559.2098 | -6.42548 | 1.952273 | -3.29128 | 9.97E-04 | 0.019237 | Dcn           | DOWN |
| 805.0551 | -7.40858 | 2.250453 | -3.29204 | 9.95E-04 | 0.019237 | Isca2         | DOWN |
| 507.468  | 6.344441 | 1.927586 | 3.291392 | 9.97E-04 | 0.019237 | Laptm5        | UP   |
| 901.6588 | 5.798003 | 1.761523 | 3.291472 | 9.97E-04 | 0.019237 | Tnpo2         | UP   |
| 1282.788 | 7.388688 | 2.247141 | 3.288039 | 0.001009 | 0.019388 | Amhr2         | UP   |
| 316.1655 | 6.409597 | 1.949157 | 3.288395 | 0.001008 | 0.019388 | Gm10400       | UP   |
| 1950.616 | -7.92138 | 2.408919 | -3.28835 | 0.001008 | 0.019388 | Serpinb9      | DOWN |
| 1983.942 | 7.265873 | 2.211174 | 3.285979 | 0.001016 | 0.019483 | Aprt          | UP   |
| 110.6776 | -4.27098 | 1.299752 | -3.28599 | 0.001016 | 0.019483 | Dnajb9        | DOWN |
| 1923.782 | 7.312802 | 2.22667  | 3.284187 | 0.001023 | 0.019569 | Cdkn1a        | UP   |
| 52.99213 | -2.35599 | 0.717404 | -3.28405 | 0.001023 | 0.019569 | Rbm3          | DOWN |
| 457.4747 | 6.946801 | 2.115688 | 3.283472 | 0.001025 | 0.019585 | Lsm5          | UP   |
| 99.97337 | -3.33538 | 1.016199 | -3.28221 | 0.00103  | 0.019637 | Gm6916        | DOWN |
| 694.352  | -6.80254 | 2.072654 | -3.28204 | 0.001031 | 0.019637 | Peg12         | DOWN |
| 91.56453 | 4.263902 | 1.299307 | 3.281673 | 0.001032 | 0.019639 | Etfbkmt       | UP   |
| 638.3661 | -6.27128 | 1.911458 | -3.28089 | 0.001035 | 0.01967  | Prmt3         | DOWN |
| 2421.93  | 7.331092 | 2.234726 | 3.280533 | 0.001036 | 0.019671 | Capzb         | UP   |
| 1120.212 | 7.762484 | 2.366529 | 3.280114 | 0.001038 | 0.019677 | Dcaf81        | UP   |
| 981.6386 | -7.08976 | 2.161675 | -3.27975 | 0.001039 | 0.019678 | Tspan31       | DOWN |
| 3020.805 | 7.234702 | 2.20622  | 3.279229 | 0.001041 | 0.019691 | Rab2a         | UP   |
| 1657.314 | 6.837175 | 2.086345 | 3.277106 | 0.001049 | 0.019816 | Rtel1         | UP   |
| 488.1295 | -7.12545 | 2.174581 | -3.2767  | 0.00105  | 0.01982  | Nutf2         | DOWN |
| 5405.066 | 6.714208 | 2.050434 | 3.27453  | 0.001058 | 0.019854 | Eef2          | UP   |
| 339.3202 | -5.91737 | 1.806705 | -3.27523 | 0.001056 | 0.019854 | Ier3ipl       | DOWN |
| 923.0239 | 6.910387 | 2.11013  | 3.274863 | 0.001057 | 0.019854 | Ormdl3        | UP   |
| 971.498  | -6.32598 | 1.931368 | -3.27539 | 0.001055 | 0.019854 | Ranbp9        | DOWN |
| 1013.543 | -6.7438  | 2.059355 | -3.27471 | 0.001058 | 0.019854 | Tram1         | DOWN |
| 776.986  | 5.869522 | 1.793356 | 3.272927 | 0.001064 | 0.019943 | Btgl          | UP   |
| 883.5223 | 7.419875 | 2.268532 | 3.270783 | 0.001073 | 0.020027 | Asnsd1        | UP   |
| 303.451  | -6.08032 | 1.859005 | -3.27074 | 0.001073 | 0.020027 | Smim11        | DOWN |
| 180.5105 | 5.264018 | 1.609241 | 3.271119 | 0.001071 | 0.020027 | Trapla        | UP   |
| 2172.485 | -7.31738 | 2.237795 | -3.26991 | 0.001076 | 0.020062 | Plrg1         | DOWN |
| 1752.293 | 7.275044 | 2.226059 | 3.268127 | 0.001083 | 0.020164 | Mex3c         | UP   |
| 1490.051 | -7.05105 | 2.157989 | -3.26742 | 0.001085 | 0.020191 | Idh3a         | DOWN |
| 1084.851 | 7.222789 | 2.211523 | 3.26598  | 0.001091 | 0.020244 | 4930563M21Rik | UP   |
| 36.29149 | -2.87074 | 0.879439 | -3.26429 | 0.001097 | 0.020244 | C430049B03Rik | DOWN |
| 785.832  | 6.893532 | 2.11097  | 3.265576 | 0.001092 | 0.020244 | Cacng4        | UP   |
| 873.1049 | 5.690871 | 1.743521 | 3.26401  | 0.001098 | 0.020244 | Ddx19a        | UP   |
| 428.9719 | 6.235905 | 1.909811 | 3.265194 | 0.001094 | 0.020244 | Gatm          | UP   |
| 110.0196 | -4.0586  | 1.243225 | -3.26458 | 0.001096 | 0.020244 | Hnrnpf        | DOWN |
| 897.2429 | 7.15249  | 2.190248 | 3.265608 | 0.001092 | 0.020244 | Qrs11         | UP   |
| 625.5088 | -6.69392 | 2.050413 | -3.26467 | 0.001096 | 0.020244 | Tex12         | DOWN |
| 48.43803 | -2.6626  | 0.815911 | -3.26335 | 0.001101 | 0.020251 | Ppib          | DOWN |
| 17634    | -3.90994 | 1.198175 | -3.26324 | 0.001101 | 0.020251 | Prdx1         | DOWN |
| 344.5228 | -5.76962 | 1.768674 | -3.26211 | 0.001106 | 0.020285 | Bcap31        | DOWN |
| 621.4808 | -6.59402 | 2.021295 | -3.26228 | 0.001105 | 0.020285 | Saysd1        | DOWN |
| 700.6923 | -6.47018 | 1.983836 | -3.26145 | 0.001108 | 0.020301 | Gpr160        | DOWN |
| 745.555  | 6.737352 | 2.065899 | 3.261221 | 0.001109 | 0.020301 | Itpk1         | UP   |

|          |          |          |          |          |          |               |      |
|----------|----------|----------|----------|----------|----------|---------------|------|
| 2034.426 | -6.30709 | 1.934673 | -3.26003 | 0.001114 | 0.020316 | Brix1         | DOWN |
| 1344.862 | -6.8038  | 2.086913 | -3.26022 | 0.001113 | 0.020316 | Psm8          | DOWN |
| 97.98459 | -3.68543 | 1.130376 | -3.26036 | 0.001113 | 0.020316 | Ssh3          | DOWN |
| 311.8225 | -6.07924 | 1.865271 | -3.25917 | 0.001117 | 0.020354 | C230071H17Rik | DOWN |
| 254.232  | -5.5907  | 1.715633 | -3.25868 | 0.001119 | 0.020365 | BC065397      | DOWN |
| 201.4627 | -5.52007 | 1.694903 | -3.25687 | 0.001126 | 0.020435 | Efcab7        | DOWN |
| 14.22118 | 3.493236 | 1.072443 | 3.25727  | 0.001125 | 0.020435 | Rpl5-ps1      | UP   |
| 3499.291 | 6.656617 | 2.043961 | 3.256725 | 0.001127 | 0.020435 | Zmym5         | UP   |
| 1587.034 | 7.018014 | 2.155217 | 3.256291 | 0.001129 | 0.020443 | Per1          | UP   |
| 1029.695 | -6.90697 | 2.121786 | -3.25526 | 0.001133 | 0.02047  | Pabpc41       | DOWN |
| 39.9676  | 2.747249 | 0.843889 | 3.25546  | 0.001132 | 0.02047  | Tcf21         | UP   |
| 2638.904 | 5.726534 | 1.759691 | 3.254284 | 0.001137 | 0.020517 | Scaf11        | UP   |
| 1378.949 | -6.8415  | 2.102855 | -3.25343 | 0.00114  | 0.020555 | Fbxo38        | DOWN |
| 581.4874 | 6.758191 | 2.078209 | 3.25193  | 0.001146 | 0.020568 | 2310034G01Rik | UP   |
| 230.2556 | 5.146392 | 1.582872 | 3.2513   | 0.001149 | 0.020568 | A730063M14Rik | UP   |
| 70.24443 | 3.319677 | 1.020679 | 3.252421 | 0.001144 | 0.020568 | AC106834.1    | UP   |
| 81.67695 | 3.668131 | 1.128317 | 3.250974 | 0.00115  | 0.020568 | Klf6          | UP   |
| 2423.37  | 6.825073 | 2.099209 | 3.25126  | 0.001149 | 0.020568 | Ncapg2        | UP   |
| 164.8315 | -4.74155 | 1.457815 | -3.2525  | 0.001144 | 0.020568 | Ppat          | DOWN |
| 829.1118 | 6.61022  | 2.033192 | 3.251154 | 0.001149 | 0.020568 | Wars2         | UP   |
| 73.86465 | -3.82843 | 1.177944 | -3.25009 | 0.001154 | 0.020609 | Mrpl44        | DOWN |
| 418.6433 | -6.43624 | 1.982512 | -3.24651 | 0.001168 | 0.020722 | Chmp1b        | DOWN |
| 264.7338 | 5.840848 | 1.798463 | 3.247689 | 0.001163 | 0.020722 | Gm42991       | UP   |
| 761.6075 | -6.64728 | 2.047568 | -3.24643 | 0.001169 | 0.020722 | Hint3         | DOWN |
| 1398.02  | 6.940179 | 2.137131 | 3.247429 | 0.001165 | 0.020722 | Rangap1       | UP   |
| 469.359  | -6.33193 | 1.950506 | -3.2463  | 0.001169 | 0.020722 | Rnf7          | DOWN |
| 147.4846 | -4.14164 | 1.275812 | -3.24628 | 0.001169 | 0.020722 | Thumpd3       | DOWN |
| 718.1402 | -6.6238  | 2.039245 | -3.24816 | 0.001162 | 0.020722 | Ypel3         | DOWN |
| 23.06446 | 3.375492 | 1.040012 | 3.245629 | 0.001172 | 0.020746 | Gm5100        | UP   |
| 1273.87  | -6.47318 | 1.995239 | -3.24431 | 0.001177 | 0.020819 | Klh124        | DOWN |
| 1202.757 | 5.984709 | 1.845255 | 3.243297 | 0.001182 | 0.020851 | Dnajc10       | UP   |
| 631.893  | -6.68313 | 2.061644 | -3.24165 | 0.001188 | 0.020851 | Elp5          | DOWN |
| 170.3332 | -4.28331 | 1.321344 | -3.24163 | 0.001188 | 0.020851 | Gatad1        | DOWN |
| 296.665  | -5.90305 | 1.820627 | -3.24232 | 0.001186 | 0.020851 | Gm9958        | DOWN |
| 816.2597 | 6.597401 | 2.035078 | 3.241842 | 0.001188 | 0.020851 | Ifnar1        | UP   |
| 2620.189 | 7.027436 | 2.167639 | 3.241978 | 0.001187 | 0.020851 | Trir          | UP   |
| 553.7139 | 7.066698 | 2.179098 | 3.242947 | 0.001183 | 0.020851 | Uqcc3         | UP   |
| 94321.18 | 6.383528 | 1.969723 | 3.240825 | 0.001192 | 0.020887 | CT010467.1    | UP   |
| 1219.279 | -6.71774 | 2.073781 | -3.23937 | 0.001198 | 0.020971 | Fhl           | DOWN |
| 605.7253 | -6.30757 | 1.947516 | -3.23877 | 0.0012   | 0.020991 | Erg28         | DOWN |
| 592.4647 | 6.830032 | 2.109365 | 3.237956 | 0.001204 | 0.021028 | Clqtnf7       | UP   |
| 1509.808 | 7.256207 | 2.241966 | 3.236538 | 0.00121  | 0.021052 | Alg3          | UP   |
| 457.5241 | -5.31605 | 1.642597 | -3.23637 | 0.001211 | 0.021052 | Eif4a2        | DOWN |
| 359.8903 | 5.893862 | 1.820954 | 3.236688 | 0.001209 | 0.021052 | Gm5112        | UP   |
| 18.22427 | 2.818255 | 0.870689 | 3.23681  | 0.001209 | 0.021052 | O1fr1349      | UP   |
| 802.018  | -6.39784 | 1.977268 | -3.2357  | 0.001213 | 0.021078 | Tfg           | DOWN |
| 312.9442 | 5.555038 | 1.717097 | 3.235134 | 0.001216 | 0.021096 | Pdlim2        | UP   |
| 2026.989 | 6.820829 | 2.108925 | 3.234268 | 0.00122  | 0.021137 | Mapk10        | UP   |
| 743.6997 | -7.92088 | 2.449705 | -3.2334  | 0.001223 | 0.021178 | Snhg6         | DOWN |
| 1150.517 | -6.91558 | 2.139314 | -3.23262 | 0.001227 | 0.021213 | Cnn2          | DOWN |
| 2299.623 | 6.82921  | 2.113373 | 3.231427 | 0.001232 | 0.021278 | Kctd3         | UP   |
| 297.5733 | -5.32579 | 1.648779 | -3.23014 | 0.001237 | 0.02135  | Rps6ka6       | DOWN |
| 191.7682 | -4.7911  | 1.48365  | -3.22927 | 0.001241 | 0.021392 | Serinc1       | DOWN |
| 1178.515 | 6.88605  | 2.136052 | 3.223728 | 0.001265 | 0.021613 | Ccdc137       | UP   |

|          |          |          |          |          |          |               |      |
|----------|----------|----------|----------|----------|----------|---------------|------|
| 35.47104 | -2.9769  | 0.923806 | -3.22242 | 0.001271 | 0.021613 | Coro1b        | DOWN |
| 1696.418 | 6.900211 | 2.14128  | 3.22247  | 0.001271 | 0.021613 | Csnk1d        | UP   |
| 1703.799 | 6.820768 | 2.117006 | 3.221894 | 0.001273 | 0.021613 | Csnk1g2       | UP   |
| 1424.472 | -6.53586 | 2.027404 | -3.22376 | 0.001265 | 0.021613 | Dab2          | DOWN |
| 49.43966 | -2.42966 | 0.7533   | -3.22536 | 0.001258 | 0.021613 | Gm1965        | DOWN |
| 24.4446  | 2.443161 | 0.757703 | 3.224429 | 0.001262 | 0.021613 | Gm53          | UP   |
| 1444.173 | 7.016245 | 2.177824 | 3.221677 | 0.001274 | 0.021613 | Gtf2h4        | UP   |
| 1746.299 | -6.90607 | 2.143638 | -3.22166 | 0.001275 | 0.021613 | Map11c3b      | DOWN |
| 347.7235 | -6.1356  | 1.902095 | -3.22571 | 0.001257 | 0.021613 | Meiob         | DOWN |
| 25.91463 | -2.44286 | 0.757926 | -3.22308 | 0.001268 | 0.021613 | Pil6          | DOWN |
| 1420.69  | 7.045056 | 2.184179 | 3.225493 | 0.001258 | 0.021613 | Sqstm1        | UP   |
| 1217.927 | -7.07196 | 2.193242 | -3.22443 | 0.001262 | 0.021613 | Tmem123       | DOWN |
| 3241.792 | 6.802382 | 2.109748 | 3.224263 | 0.001263 | 0.021613 | Trim24        | UP   |
| 1771.338 | 6.831244 | 2.12034  | 3.221769 | 0.001274 | 0.021613 | Zp3           | UP   |
| 2747.19  | 6.609047 | 2.051684 | 3.221279 | 0.001276 | 0.021618 | Map1a         | UP   |
| 2053.905 | 7.049847 | 2.189932 | 3.219208 | 0.001285 | 0.021752 | Ccdc34        | UP   |
| 59.38248 | -7.59742 | 2.36057  | -3.21847 | 0.001289 | 0.021784 | 6330403K07Rik | DOWN |
| 1483.212 | 6.89344  | 2.142633 | 3.217275 | 0.001294 | 0.021852 | Ivd           | UP   |
| 2007.649 | 6.367089 | 1.980076 | 3.215577 | 0.001302 | 0.021958 | Pcgf6         | UP   |
| 2284.818 | 6.536333 | 2.033103 | 3.214955 | 0.001305 | 0.021982 | Cdc34         | UP   |
| 3283.888 | -7.00311 | 2.178561 | -3.21456 | 0.001306 | 0.021989 | Zfp423        | DOWN |
| 1013.561 | -7.06265 | 2.197976 | -3.21325 | 0.001312 | 0.022012 | Ccdc163       | DOWN |
| 1573.129 | -6.82712 | 2.125162 | -3.21252 | 0.001316 | 0.022012 | Cog7          | DOWN |
| 1123.416 | 7.135621 | 2.221264 | 3.212414 | 0.001316 | 0.022012 | Hacd4         | UP   |
| 1214.757 | -6.8019  | 2.117089 | -3.21286 | 0.001314 | 0.022012 | Lcmt1         | DOWN |
| 265.3641 | 5.716953 | 1.779224 | 3.213171 | 0.001313 | 0.022012 | Mfap1b        | UP   |
| 1220.652 | -6.95734 | 2.164868 | -3.21375 | 0.00131  | 0.022012 | Srbd1         | DOWN |
| 1478.193 | 6.892809 | 2.146209 | 3.211621 | 0.00132  | 0.02205  | 4933427D06Rik | UP   |
| 3297.342 | 6.781455 | 2.111802 | 3.211218 | 0.001322 | 0.022057 | Wdr36         | UP   |
| 56.73962 | -2.75064 | 0.856838 | -3.21022 | 0.001326 | 0.02211  | Txlng         | DOWN |
| 1981.184 | -7.1308  | 2.221863 | -3.20938 | 0.00133  | 0.022128 | Zbtb45        | DOWN |
| 1796.017 | -6.95709 | 2.167635 | -3.20953 | 0.00133  | 0.022128 | Zfp655        | DOWN |
| 174.0161 | 4.693235 | 1.46255  | 3.208941 | 0.001332 | 0.022138 | Ube2g2        | UP   |
| 405.8533 | -5.92571 | 1.846885 | -3.20849 | 0.001334 | 0.02215  | Ift46         | DOWN |
| 1575.393 | 5.619747 | 1.751941 | 3.207727 | 0.001338 | 0.022185 | Ablim1        | UP   |
| 236.0677 | 5.262002 | 1.640718 | 3.207134 | 0.001341 | 0.022208 | Dapk3         | UP   |
| 1450.066 | 7.109158 | 2.218533 | 3.204441 | 0.001353 | 0.022374 | Arhgap11a     | UP   |
| 609.3233 | 6.867643 | 2.143207 | 3.204377 | 0.001354 | 0.022374 | Gnb5          | UP   |
| 476.135  | -6.18892 | 1.933021 | -3.20168 | 0.001366 | 0.022443 | Cry1          | DOWN |
| 975.25   | -6.6264  | 2.069352 | -3.20216 | 0.001364 | 0.022443 | Ddx51         | DOWN |
| 1213.426 | -6.75566 | 2.109498 | -3.2025  | 0.001362 | 0.022443 | Eno1          | DOWN |
| 21.94385 | -3.05767 | 0.95481  | -3.20239 | 0.001363 | 0.022443 | Nxt1          | DOWN |
| 1213.601 | 6.898288 | 2.153765 | 3.202897 | 0.001361 | 0.022443 | Pam16         | UP   |
| 1337.592 | 7.093629 | 2.215545 | 3.201754 | 0.001366 | 0.022443 | Rhog          | UP   |
| 561.6746 | -6.63698 | 2.075184 | -3.19826 | 0.001383 | 0.022687 | Peg10         | DOWN |
| 1273.942 | 6.714836 | 2.100127 | 3.197347 | 0.001387 | 0.022735 | E11           | UP   |
| 218.8042 | 5.483444 | 1.715173 | 3.19702  | 0.001389 | 0.022738 | AA465934      | UP   |
| 1429.138 | -7.00552 | 2.191936 | -3.19604 | 0.001393 | 0.022773 | Cip2a         | DOWN |
| 332.2776 | -5.5439  | 1.734657 | -3.19597 | 0.001394 | 0.022773 | Tmem106b      | DOWN |
| 214.0719 | 5.000129 | 1.564949 | 3.195074 | 0.001398 | 0.022813 | Vps26c        | UP   |
| 2000.2   | 7.32187  | 2.291763 | 3.194864 | 0.001399 | 0.022813 | Zmat1         | UP   |
| 1791.865 | 7.436709 | 2.328561 | 3.193693 | 0.001405 | 0.022864 | Fam98a        | UP   |
| 1648.934 | 9.231816 | 2.890881 | 3.193426 | 0.001406 | 0.022864 | Gm37598       | UP   |
| 1309.586 | 7.239785 | 2.267162 | 3.193325 | 0.001406 | 0.022864 | Umps          | UP   |



|          |          |          |          |          |          |               |      |
|----------|----------|----------|----------|----------|----------|---------------|------|
| 133.2744 | -4.58936 | 1.437944 | -3.19161 | 0.001415 | 0.022976 | Colec12       | DOWN |
| 147.5843 | 4.61398  | 1.44598  | 3.190903 | 0.001418 | 0.023009 | Vkorc1        | UP   |
| 368.2691 | 5.93827  | 1.861266 | 3.190446 | 0.001421 | 0.023021 | Gpr137        | UP   |
| 9901.79  | -4.46674 | 1.400183 | -3.19011 | 0.001422 | 0.023024 | Sarnp         | DOWN |
| 1898.321 | -6.84035 | 2.144517 | -3.18969 | 0.001424 | 0.023034 | Rbm10         | DOWN |
| 209.0411 | 4.880555 | 1.530867 | 3.188098 | 0.001432 | 0.023095 | Hacd3         | UP   |
| 17.07337 | -3.12734 | 0.98096  | -3.18804 | 0.001432 | 0.023095 | Numb          | DOWN |
| 1350.311 | 6.757883 | 2.119739 | 3.188073 | 0.001432 | 0.023095 | Tdrd5         | UP   |
| 1659.362 | 6.883929 | 2.159716 | 3.187423 | 0.001435 | 0.02312  | 9130401M01Rik | UP   |
| 1584.664 | 5.697686 | 1.787726 | 3.187113 | 0.001437 | 0.023122 | Hdglf12       | UP   |
| 1470.632 | 6.889363 | 2.164665 | 3.182646 | 0.001459 | 0.023457 | Arid4a        | UP   |
| 1415.778 | 7.18016  | 2.257646 | 3.180374 | 0.001471 | 0.023618 | Wdfy1         | UP   |
| 2030.319 | 6.977031 | 2.194009 | 3.180037 | 0.001473 | 0.023621 | Ckap4         | UP   |
| 333.2041 | 6.02398  | 1.895145 | 3.178638 | 0.00148  | 0.023711 | Polr21        | UP   |
| 851.2715 | -6.59626 | 2.077002 | -3.17586 | 0.001494 | 0.023876 | Fbxl3         | DOWN |
| 165.8244 | -4.7185  | 1.485899 | -3.17552 | 0.001496 | 0.023876 | Golga5        | DOWN |
| 2060.446 | -6.71997 | 2.116229 | -3.17545 | 0.001496 | 0.023876 | Marchf8       | DOWN |
| 1522.738 | -6.79891 | 2.140674 | -3.17606 | 0.001493 | 0.023876 | Prim1         | DOWN |
| 3775.494 | 6.751466 | 2.126396 | 3.175075 | 0.001498 | 0.023878 | Bsg           | UP   |
| 1276.477 | 7.172873 | 2.259287 | 3.17484  | 0.001499 | 0.023878 | Oard1         | UP   |
| 1063.282 | -5.63552 | 1.775706 | -3.17368 | 0.001505 | 0.023949 | Ncoa3         | DOWN |
| 2013.37  | 7.02168  | 2.212816 | 3.173187 | 0.001508 | 0.023966 | Apbb1         | UP   |
| 65.95468 | 3.082094 | 0.971541 | 3.172375 | 0.001512 | 0.024008 | Crabp2        | UP   |
| 236.1257 | -5.11145 | 1.61161  | -3.17164 | 0.001516 | 0.02402  | Calu          | DOWN |
| 1007.396 | 5.511248 | 1.737634 | 3.171697 | 0.001516 | 0.02402  | Cr1s1         | UP   |
| 577.4671 | -7.00257 | 2.209272 | -3.16963 | 0.001526 | 0.024033 | AU020206      | DOWN |
| 1146.495 | 6.898472 | 2.175729 | 3.170649 | 0.001521 | 0.024033 | Crk           | UP   |
| 918.748  | -6.66103 | 2.10157  | -3.16955 | 0.001527 | 0.024033 | Ddost         | DOWN |
| 213.5744 | -5.07845 | 1.602315 | -3.16944 | 0.001527 | 0.024033 | Pwp1          | DOWN |
| 2490.444 | 7.088566 | 2.235819 | 3.170456 | 0.001522 | 0.024033 | Slc27a4       | UP   |
| 1739.076 | 7.342562 | 2.3165   | 3.169679 | 0.001526 | 0.024033 | Zfp105        | UP   |
| 775.6213 | 6.629168 | 2.09077  | 3.170682 | 0.001521 | 0.024033 | Zfp91         | UP   |
| 102.4716 | -3.70717 | 1.169787 | -3.1691  | 0.001529 | 0.024038 | Rpl13a        | DOWN |
| 753.8649 | -6.70661 | 2.116669 | -3.16847 | 0.001532 | 0.024042 | Asb8          | DOWN |
| 631.5614 | -6.61012 | 2.086163 | -3.16855 | 0.001532 | 0.024042 | Ntf3          | DOWN |
| 154.9409 | -4.68093 | 1.478053 | -3.16695 | 0.00154  | 0.024139 | Pla2g7        | DOWN |
| 2500.27  | 7.268195 | 2.295186 | 3.166713 | 0.001542 | 0.024139 | Srp68         | UP   |
| 1465.829 | -6.91036 | 2.18283  | -3.16578 | 0.001547 | 0.024193 | Lsm6          | DOWN |
| 2747.417 | -6.66912 | 2.107579 | -3.16435 | 0.001554 | 0.02424  | Cdk16         | DOWN |
| 2184.857 | 6.810698 | 2.151964 | 3.164875 | 0.001551 | 0.02424  | Figl          | UP   |
| 1531.524 | 6.861629 | 2.168398 | 3.164377 | 0.001554 | 0.02424  | Sap301        | UP   |
| 580.6529 | 6.582504 | 2.080445 | 3.163988 | 0.001556 | 0.024246 | 7420426K07Rik | UP   |
| 1142.814 | 6.693225 | 2.116129 | 3.162957 | 0.001562 | 0.024308 | Spout1        | UP   |
| 37.52302 | -2.95324 | 0.933833 | -3.16249 | 0.001564 | 0.024322 | Nap112        | DOWN |
| 980.2467 | -6.46906 | 2.045749 | -3.1622  | 0.001566 | 0.024323 | Btbd10        | DOWN |
| 94.31185 | 3.433253 | 1.086077 | 3.16115  | 0.001571 | 0.024338 | Icam1         | UP   |
| 197.3333 | 4.352857 | 1.376834 | 3.161496 | 0.00157  | 0.024338 | Tsga10        | UP   |
| 746.9048 | 6.673733 | 2.111036 | 3.161354 | 0.00157  | 0.024338 | Znhit1        | UP   |
| 1984.819 | 5.93522  | 1.877935 | 3.160504 | 0.001575 | 0.024369 | Lmo7          | UP   |
| 2233.316 | -6.65418 | 2.106475 | -3.15892 | 0.001584 | 0.024471 | Mff           | DOWN |
| 925.197  | 6.610949 | 2.09293  | 3.158706 | 0.001585 | 0.024471 | Nop2          | UP   |
| 2135.402 | 7.105685 | 2.250451 | 3.157449 | 0.001592 | 0.024553 | Zfp395        | UP   |
| 1116.025 | -6.5404  | 2.072016 | -3.15654 | 0.001597 | 0.024604 | Spg21         | DOWN |
| 282.6805 | -5.41041 | 1.71418  | -3.15627 | 0.001598 | 0.024604 | Tpil          | DOWN |

|          |          |          |          |          |          |               |      |
|----------|----------|----------|----------|----------|----------|---------------|------|
| 1340.944 | -6.81244 | 2.159842 | -3.15414 | 0.00161  | 0.024712 | Ercc8         | DOWN |
| 1693.41  | -6.87946 | 2.180844 | -3.1545  | 0.001608 | 0.024712 | Tmeff2        | DOWN |
| 258.1054 | 5.184886 | 1.643749 | 3.154305 | 0.001609 | 0.024712 | Zfp626        | UP   |
| 40.00591 | -2.58233 | 0.81886  | -3.15357 | 0.001613 | 0.024736 | Nudt4         | DOWN |
| 286.706  | -5.42317 | 1.720471 | -3.15214 | 0.001621 | 0.024833 | Flrt2         | DOWN |
| 112.0453 | 4.133365 | 1.311496 | 3.151643 | 0.001624 | 0.024851 | Pop7          | UP   |
| 73.94836 | 3.740402 | 1.187625 | 3.14948  | 0.001636 | 0.024993 | Gm47493       | UP   |
| 814.8777 | 6.845722 | 2.17365  | 3.149412 | 0.001636 | 0.024993 | Tkt11         | UP   |
| 18.70332 | -2.78648 | 0.884858 | -3.14907 | 0.001638 | 0.024998 | Rab5a         | DOWN |
| 291.1888 | 6.66201  | 2.116355 | 3.14787  | 0.001645 | 0.025052 | 1700007L15Rik | UP   |
| 1250     | -5.68677 | 1.806813 | -3.14741 | 0.001647 | 0.025052 | Angel2        | DOWN |
| 932.4824 | -6.57464 | 2.088973 | -3.14731 | 0.001648 | 0.025052 | Banf1         | DOWN |
| 1077.636 | -6.77857 | 2.153608 | -3.14754 | 0.001646 | 0.025052 | Ptar1         | DOWN |
| 94.84109 | -3.75392 | 1.193597 | -3.14505 | 0.001661 | 0.025214 | Cpxm1         | DOWN |
| 131.572  | -4.66974 | 1.48488  | -3.14486 | 0.001662 | 0.025214 | Tex261        | DOWN |
| 469.3898 | 5.977671 | 1.901124 | 3.144282 | 0.001665 | 0.025239 | Irgm1         | UP   |
| 939.0085 | 6.845668 | 2.177458 | 3.14388  | 0.001667 | 0.025247 | Leng1         | UP   |
| 1012.737 | 7.028652 | 2.235842 | 3.143626 | 0.001669 | 0.025247 | Tpk1          | UP   |
| 112.5882 | -4.52972 | 1.441578 | -3.1422  | 0.001677 | 0.025261 | Agtr2         | DOWN |
| 1971.482 | 6.876825 | 2.190719 | 3.139071 | 0.001695 | 0.025261 | Anapc2        | UP   |
| 2401.857 | 6.577204 | 2.094723 | 3.139892 | 0.00169  | 0.025261 | Atad2b        | UP   |
| 652.1798 | -6.12734 | 1.951821 | -3.13929 | 0.001694 | 0.025261 | Cand1         | DOWN |
| 2077.115 | 6.71444  | 2.136395 | 3.142884 | 0.001673 | 0.025261 | Cdip1         | UP   |
| 1091.325 | 6.604779 | 2.104021 | 3.139122 | 0.001695 | 0.025261 | Enpp2         | UP   |
| 2019.703 | -6.75876 | 2.152671 | -3.13971 | 0.001691 | 0.025261 | Farsa         | DOWN |
| 176.6196 | 4.540359 | 1.445784 | 3.140414 | 0.001687 | 0.025261 | Gm9493        | UP   |
| 892.3509 | 6.476106 | 2.060957 | 3.142282 | 0.001676 | 0.025261 | Hgs           | UP   |
| 1698.927 | 5.799216 | 1.846472 | 3.1407   | 0.001685 | 0.025261 | Myo9a         | UP   |
| 2410.028 | 6.740342 | 2.147181 | 3.139159 | 0.001694 | 0.025261 | Prmt7         | UP   |
| 391.3141 | -6.19165 | 1.970857 | -3.1416  | 0.00168  | 0.025261 | Psm10         | DOWN |
| 238.6417 | 5.203107 | 1.656869 | 3.140324 | 0.001688 | 0.025261 | Rab5b         | UP   |
| 1137.439 | -6.14767 | 1.956415 | -3.14231 | 0.001676 | 0.025261 | Rbm38         | DOWN |
| 93.06562 | -4.2091  | 1.340193 | -3.14067 | 0.001686 | 0.025261 | Rnf26         | DOWN |
| 1476.121 | 6.851021 | 2.182553 | 3.138995 | 0.001695 | 0.025261 | Serh1         | UP   |
| 1216.69  | 6.616787 | 2.108201 | 3.138595 | 0.001698 | 0.025271 | Cd47          | UP   |
| 1415.938 | -7.22196 | 2.302681 | -3.13633 | 0.001711 | 0.025443 | Cmtm3         | DOWN |
| 2440.512 | 6.664055 | 2.125481 | 3.135316 | 0.001717 | 0.025459 | Nhlrc2        | UP   |
| 1854.079 | 6.94549  | 2.215011 | 3.135646 | 0.001715 | 0.025459 | Rad23b        | UP   |
| 774.4757 | 5.797124 | 1.84894  | 3.135378 | 0.001716 | 0.025459 | Rnf170        | UP   |
| 7963.68  | -6.40552 | 2.044712 | -3.13272 | 0.001732 | 0.02564  | Eef1d         | DOWN |
| 853.9983 | -5.62293 | 1.794969 | -3.13261 | 0.001733 | 0.02564  | Ssr1          | DOWN |
| 1549.442 | -6.29692 | 2.010248 | -3.13241 | 0.001734 | 0.02564  | Zfp207        | DOWN |
| 24.91927 | -2.5286  | 0.807617 | -3.13094 | 0.001742 | 0.025696 | Atp6v0d1      | DOWN |
| 26.76945 | -2.4039  | 0.76776  | -3.13105 | 0.001742 | 0.025696 | Cep85         | DOWN |
| 47.97571 | -2.22724 | 0.711276 | -3.13133 | 0.00174  | 0.025696 | Cxxc5         | DOWN |
| 1966.746 | 6.704129 | 2.141878 | 3.130025 | 0.001748 | 0.025704 | Chpt1         | UP   |
| 1788.306 | -6.69043 | 2.137184 | -3.13049 | 0.001745 | 0.025704 | Cops8         | DOWN |
| 40.01872 | -2.83479 | 0.905612 | -3.13024 | 0.001747 | 0.025704 | Zfand2b       | DOWN |
| 215.4818 | -4.34802 | 1.389572 | -3.12904 | 0.001754 | 0.025766 | Phospho2      | DOWN |
| 950.0188 | 6.857415 | 2.191797 | 3.128672 | 0.001756 | 0.025774 | Asrg11        | UP   |
| 299.7077 | 5.508798 | 1.761009 | 3.128206 | 0.001759 | 0.025791 | Cdk5rap3      | UP   |
| 17.29913 | -3.14152 | 1.004401 | -3.12775 | 0.001761 | 0.025807 | Yars2         | DOWN |
| 1479.249 | 6.539513 | 2.091281 | 3.127037 | 0.001766 | 0.025829 | 1700025G04Rik | UP   |
| 128.4567 | -4.14357 | 1.325116 | -3.12695 | 0.001766 | 0.025829 | Tbx3os1       | DOWN |

|          |          |          |          |          |          |               |      |
|----------|----------|----------|----------|----------|----------|---------------|------|
| 82.06398 | 3.228666 | 1.032703 | 3.126422 | 0.001769 | 0.025831 | Slu7          | UP   |
| 1778.631 | 6.505038 | 2.080692 | 3.126381 | 0.00177  | 0.025831 | Tulp4         | UP   |
| 2179.863 | 6.646371 | 2.126516 | 3.125475 | 0.001775 | 0.025887 | Mtal          | UP   |
| 1975.189 | 6.868031 | 2.197651 | 3.125169 | 0.001777 | 0.02589  | Slc25a12      | UP   |
| 354.6953 | -5.18134 | 1.658409 | -3.12428 | 0.001782 | 0.025896 | Nt5dc2        | DOWN |
| 662.3936 | 6.404578 | 2.049597 | 3.124799 | 0.001779 | 0.025896 | Pigs          | UP   |
| 243.417  | -5.01395 | 1.60473  | -3.12448 | 0.001781 | 0.025896 | Syap1         | DOWN |
| 1533.908 | 6.719188 | 2.151141 | 3.123546 | 0.001787 | 0.025937 | Nsrp1         | UP   |
| 706.4015 | -6.52125 | 2.08856  | -3.12237 | 0.001794 | 0.026017 | Tmem237       | DOWN |
| 1344.578 | -6.63292 | 2.124848 | -3.1216  | 0.001799 | 0.026037 | Cope          | DOWN |
| 1475.141 | 6.71378  | 2.150708 | 3.12166  | 0.001798 | 0.026037 | Prr51         | UP   |
| 2028.926 | -6.63551 | 2.126134 | -3.12093 | 0.001803 | 0.026048 | Appbp2        | DOWN |
| 3486.559 | 6.578634 | 2.1078   | 3.121091 | 0.001802 | 0.026048 | Safb2         | UP   |
| 1527.995 | -6.79284 | 2.177259 | -3.11991 | 0.001809 | 0.026115 | Mettl26       | DOWN |
| 1765.484 | -7.0245  | 2.253122 | -3.11767 | 0.001823 | 0.026265 | Hspa13        | DOWN |
| 17.65029 | 2.845954 | 0.912786 | 3.117878 | 0.001822 | 0.026265 | Slc2a4        | UP   |
| 1179.054 | -6.35421 | 2.038855 | -3.11656 | 0.00183  | 0.026302 | Dopla         | DOWN |
| 1202.476 | -6.56691 | 2.107175 | -3.11645 | 0.00183  | 0.026302 | Mfsd11        | DOWN |
| 1013.593 | -6.65946 | 2.136682 | -3.11673 | 0.001829 | 0.026302 | Shld2         | DOWN |
| 1749.648 | 6.920592 | 2.22142  | 3.115391 | 0.001837 | 0.026319 | Nfxl1         | UP   |
| 622.3675 | -6.27512 | 2.014368 | -3.11518 | 0.001838 | 0.026319 | Pdhb          | DOWN |
| 2047.836 | 6.696512 | 2.149319 | 3.115643 | 0.001835 | 0.026319 | Phtf2         | UP   |
| 317.0737 | -5.41183 | 1.737036 | -3.11555 | 0.001836 | 0.026319 | Tmem41a       | DOWN |
| 126.5766 | 4.51887  | 1.45076  | 3.114829 | 0.001841 | 0.02632  | Sntb1         | UP   |
| 30.35919 | 2.268974 | 0.728487 | 3.114639 | 0.001842 | 0.02632  | Uroc1         | UP   |
| 898.7272 | 6.482314 | 2.081901 | 3.113651 | 0.001848 | 0.026384 | Ccdc127       | UP   |
| 1350.74  | 6.65386  | 2.13722  | 3.113326 | 0.00185  | 0.026389 | Chaf1b        | UP   |
| 140.1736 | 4.452166 | 1.430495 | 3.112326 | 0.001856 | 0.026428 | Nfatc2ip      | UP   |
| 680.3615 | -6.08346 | 1.954786 | -3.11209 | 0.001858 | 0.026428 | Rac1          | DOWN |
| 1035.377 | 6.134817 | 1.9711   | 3.112382 | 0.001856 | 0.026428 | St3gal2       | UP   |
| 248.5723 | -5.6205  | 1.806653 | -3.111   | 0.001865 | 0.026501 | Acot2         | DOWN |
| 26.69653 | -2.26858 | 0.729787 | -3.10855 | 0.00188  | 0.026698 | D030056L22Rik | DOWN |
| 3156.734 | 6.729329 | 2.165247 | 3.107881 | 0.001884 | 0.026734 | Rad54l        | UP   |
| 1870.287 | 6.616993 | 2.129376 | 3.107481 | 0.001887 | 0.026747 | Gnl2          | UP   |
| 222.3806 | 5.137279 | 1.653658 | 3.106614 | 0.001892 | 0.026801 | Gm17767       | UP   |
| 543.0018 | -5.57107 | 1.793765 | -3.1058  | 0.001898 | 0.026851 | Psma5         | DOWN |
| 939.6179 | -6.57913 | 2.118662 | -3.10532 | 0.001901 | 0.026859 | Ndel1         | DOWN |
| 26.3426  | -2.47509 | 0.797085 | -3.10517 | 0.001902 | 0.026859 | Tcea2         | DOWN |
| 2457.176 | 6.549365 | 2.109749 | 3.104334 | 0.001907 | 0.026911 | Nrbp1         | UP   |
| 598.3162 | -6.63424 | 2.137556 | -3.10366 | 0.001911 | 0.026949 | B2m           | DOWN |
| 1471.882 | 6.493268 | 2.092618 | 3.10294  | 0.001916 | 0.02699  | Dis3l2        | UP   |
| 26.04755 | -2.45569 | 0.791641 | -3.10203 | 0.001922 | 0.027049 | Thap11        | DOWN |
| 82.08168 | -3.56893 | 1.151431 | -3.09956 | 0.001938 | 0.027251 | Nectin2       | DOWN |
| 1083.95  | 5.581225 | 1.800886 | 3.099156 | 0.001941 | 0.02726  | Ankhd1        | UP   |
| 1449.09  | -6.66002 | 2.149134 | -3.09893 | 0.001942 | 0.02726  | Trim26        | DOWN |
| 237.3263 | -4.85652 | 1.567509 | -3.09824 | 0.001947 | 0.0273   | Dtymk         | DOWN |
| 1072.142 | 6.711495 | 2.166987 | 3.097155 | 0.001954 | 0.027375 | Ppil3         | UP   |
| 20.91959 | -2.913   | 0.940806 | -3.09628 | 0.00196  | 0.027432 | Gm10224       | DOWN |
| 127.4078 | 3.82681  | 1.236144 | 3.095765 | 0.001963 | 0.027455 | Capn10        | UP   |
| 1723.777 | 6.636146 | 2.145813 | 3.092603 | 0.001984 | 0.027711 | Efnb1         | UP   |
| 3020.772 | 6.585133 | 2.129399 | 3.092484 | 0.001985 | 0.027711 | Sf3b2         | UP   |
| 2929.211 | 6.473169 | 2.093509 | 3.092019 | 0.001988 | 0.02773  | Mga           | UP   |
| 876.5711 | -6.67375 | 2.158821 | -3.09139 | 0.001992 | 0.027762 | Ccnc          | DOWN |
| 209.9503 | -5.16518 | 1.670957 | -3.09115 | 0.001994 | 0.027762 | Gnpda1        | DOWN |

|          |          |          |          |          |          |               |      |
|----------|----------|----------|----------|----------|----------|---------------|------|
| 629.8238 | -6.13251 | 1.98451  | -3.09019 | 0.002    | 0.027827 | 4930523C07Rik | DOWN |
| 1268.933 | 7.00439  | 2.267215 | 3.089425 | 0.002005 | 0.027874 | I1lr11        | UP   |
| 2176.715 | 6.713931 | 2.174191 | 3.088013 | 0.002015 | 0.027982 | Map2k4        | UP   |
| 179.9638 | -4.667   | 1.51218  | -3.08627 | 0.002027 | 0.028122 | Zfp748        | DOWN |
| 417.1319 | 4.89061  | 1.585726 | 3.084145 | 0.002041 | 0.028137 | 2010001K21Rik | UP   |
| 18.86213 | 2.641923 | 0.856717 | 3.083775 | 0.002044 | 0.028137 | 9630002D21Rik | UP   |
| 132.6718 | -3.58056 | 1.160564 | -3.08519 | 0.002034 | 0.028137 | Atp5mpl       | DOWN |
| 40.64329 | 2.171009 | 0.703695 | 3.085156 | 0.002034 | 0.028137 | AW011738      | UP   |
| 149.1633 | 4.793636 | 1.55474  | 3.083239 | 0.002048 | 0.028137 | Clec14a       | UP   |
| 117.6611 | 3.747982 | 1.214965 | 3.084849 | 0.002037 | 0.028137 | Phldb3        | UP   |
| 2284.687 | 6.67313  | 2.163881 | 3.083871 | 0.002043 | 0.028137 | Selenoi       | UP   |
| 1062.196 | 6.594075 | 2.137036 | 3.085618 | 0.002031 | 0.028137 | Snf8          | UP   |
| 2304.452 | 6.622213 | 2.147625 | 3.083505 | 0.002046 | 0.028137 | Sycp2         | UP   |
| 244.1978 | -5.02377 | 1.629367 | -3.08326 | 0.002047 | 0.028137 | Ubxn8         | DOWN |
| 125.9486 | -4.07621 | 1.321982 | -3.0834  | 0.002046 | 0.028137 | Zfp78         | DOWN |
| 3767.95  | 6.436847 | 2.088694 | 3.081757 | 0.002058 | 0.028252 | Ar14a         | UP   |
| 1278.321 | -6.27956 | 2.038148 | -3.08101 | 0.002063 | 0.028274 | Rmc1          | DOWN |
| 404.0658 | 5.462404 | 1.772868 | 3.081111 | 0.002062 | 0.028274 | Zp2           | UP   |
| 13.72383 | -3.51921 | 1.142353 | -3.08067 | 0.002065 | 0.028281 | Gm4742        | DOWN |
| 95.00597 | -3.08593 | 1.002026 | -3.07969 | 0.002072 | 0.028301 | Ankle2        | DOWN |
| 1506.737 | -6.92168 | 2.247402 | -3.07986 | 0.002071 | 0.028301 | Bloc1s5       | DOWN |
| 1492.242 | 6.927643 | 2.249155 | 3.080109 | 0.002069 | 0.028301 | Pias2         | UP   |
| 345.9889 | -5.70719 | 1.854793 | -3.07699 | 0.002091 | 0.028484 | Cenpq         | DOWN |
| 1805.565 | 6.596554 | 2.143662 | 3.077236 | 0.002089 | 0.028484 | Elac2         | UP   |
| 44.48    | -2.46537 | 0.801114 | -3.07743 | 0.002088 | 0.028484 | Rab5if        | DOWN |
| 999.1241 | 6.433733 | 2.092221 | 3.075073 | 0.002105 | 0.028569 | Abcd3         | UP   |
| 259.4251 | -5.04093 | 1.639032 | -3.07556 | 0.002101 | 0.028569 | Casp6         | DOWN |
| 1012.653 | -6.41837 | 2.087162 | -3.07516 | 0.002104 | 0.028569 | Cd9           | DOWN |
| 2415.474 | 6.849655 | 2.227255 | 3.07538  | 0.002102 | 0.028569 | Stimate       | UP   |
| 292.727  | 5.7096   | 1.857286 | 3.074163 | 0.002111 | 0.028632 | Micos13       | UP   |
| 1290.909 | 6.697588 | 2.179456 | 3.073055 | 0.002119 | 0.028713 | Stx7          | UP   |
| 501.8919 | -6.44527 | 2.097828 | -3.07235 | 0.002124 | 0.028756 | Mospd2        | DOWN |
| 26.15527 | -2.28556 | 0.744037 | -3.07184 | 0.002127 | 0.028756 | Hcfc2         | DOWN |
| 752.9486 | -5.1948  | 1.690974 | -3.07207 | 0.002126 | 0.028756 | Ndufab1       | DOWN |
| 16.84583 | -2.80337 | 0.91276  | -3.07132 | 0.002131 | 0.028764 | Myc           | DOWN |
| 1141.299 | -6.50724 | 2.118763 | -3.07124 | 0.002132 | 0.028764 | Ywhag         | DOWN |
| 850.6928 | -5.8051  | 1.890595 | -3.07051 | 0.002137 | 0.028788 | Ndufa6        | DOWN |
| 298.6913 | -5.00155 | 1.628913 | -3.07049 | 0.002137 | 0.028788 | Vps36         | DOWN |
| 189.2157 | -5.07251 | 1.65245  | -3.06969 | 0.002143 | 0.028815 | Bbof1         | DOWN |
| 5755.263 | -6.86123 | 2.23504  | -3.06985 | 0.002142 | 0.028815 | Psm6          | DOWN |
| 2164.095 | -5.7041  | 1.858812 | -3.06868 | 0.00215  | 0.028881 | H3f3a         | DOWN |
| 692.2514 | -5.99361 | 1.953334 | -3.0684  | 0.002152 | 0.028881 | Svbp          | DOWN |
| 1443.782 | -5.99826 | 1.95495  | -3.06824 | 0.002153 | 0.028881 | Uba1          | DOWN |
| 354.0667 | -5.3695  | 1.751015 | -3.0665  | 0.002166 | 0.028981 | Fam126a       | DOWN |
| 2062.201 | 6.748369 | 2.200511 | 3.066728 | 0.002164 | 0.028981 | Fbxo33        | UP   |
| 1633.754 | 6.489074 | 2.116153 | 3.066448 | 0.002166 | 0.028981 | Numa1         | UP   |
| 2211.849 | 6.475083 | 2.111812 | 3.066127 | 0.002169 | 0.028987 | Usp2          | UP   |
| 1235.789 | 6.620326 | 2.159677 | 3.065425 | 0.002174 | 0.028996 | Nifk          | UP   |
| 1063.077 | 6.885318 | 2.246233 | 3.065273 | 0.002175 | 0.028996 | Rspo1         | UP   |
| 57.9122  | 2.173962 | 0.709113 | 3.06575  | 0.002171 | 0.028996 | Slc43a2       | UP   |
| 28.91526 | 2.441845 | 0.797541 | 3.061716 | 0.002201 | 0.029318 | Ar15c         | UP   |
| 230.026  | 5.109204 | 1.669094 | 3.061064 | 0.002206 | 0.029356 | Cir1          | UP   |
| 67.07444 | -3.30004 | 1.078332 | -3.06032 | 0.002211 | 0.029356 | Fra10ac1      | DOWN |
| 581.3852 | 7.471244 | 2.440945 | 3.0608   | 0.002207 | 0.029356 | Gabarapl1     | UP   |

|          |          |          |          |          |          |               |      |
|----------|----------|----------|----------|----------|----------|---------------|------|
| 2619.49  | 6.62092  | 2.163431 | 3.06038  | 0.002211 | 0.029356 | Nes           | UP   |
| 457.3599 | 6.277683 | 2.051936 | 3.059396 | 0.002218 | 0.029421 | Sgpp2         | UP   |
| 98.79047 | -3.8646  | 1.263613 | -3.05837 | 0.002225 | 0.029487 | B930095G15Rik | DOWN |
| 906.8108 | -6.35754 | 2.079175 | -3.05772 | 0.00223  | 0.029487 | Rb1           | DOWN |
| 1077.241 | -6.24304 | 2.041678 | -3.0578  | 0.00223  | 0.029487 | Rrm2          | DOWN |
| 1323.813 | -6.37416 | 2.084387 | -3.05805 | 0.002228 | 0.029487 | Tmem167       | DOWN |
| 583.3047 | 5.891412 | 1.927347 | 3.056747 | 0.002238 | 0.029533 | Dna_jb2       | UP   |
| 99.58579 | 3.772987 | 1.234304 | 3.056772 | 0.002237 | 0.029533 | Psen2         | UP   |
| 802.6492 | -6.26633 | 2.05047  | -3.05604 | 0.002243 | 0.029551 | Cdca7         | DOWN |
| 446.9373 | -5.80947 | 1.901119 | -3.05581 | 0.002245 | 0.029551 | Plpp3         | DOWN |
| 122.6894 | 3.97838  | 1.301693 | 3.056312 | 0.002241 | 0.029551 | Po11          | UP   |
| 1841.682 | 6.828483 | 2.235418 | 3.054679 | 0.002253 | 0.029588 | Mvb12a        | UP   |
| 623.4419 | 5.857141 | 1.917329 | 3.054844 | 0.002252 | 0.029588 | Nub1          | UP   |
| 28.33679 | -2.54933 | 0.834497 | -3.05493 | 0.002251 | 0.029588 | Yeats4        | DOWN |
| 1727.01  | -6.29577 | 2.061674 | -3.05372 | 0.00226  | 0.029634 | Klhdc2        | DOWN |
| 184.6153 | -4.80066 | 1.571989 | -3.05388 | 0.002259 | 0.029634 | Rnd3          | DOWN |
| 1770.748 | 6.48046  | 2.122438 | 3.05331  | 0.002263 | 0.02965  | Pa2g4         | UP   |
| 64.94817 | -2.75221 | 0.901468 | -3.05303 | 0.002265 | 0.029652 | Zbed5         | DOWN |
| 2478.566 | -6.82706 | 2.236543 | -3.0525  | 0.002269 | 0.02968  | Obs11         | DOWN |
| 1727.401 | 6.800601 | 2.229222 | 3.050662 | 0.002283 | 0.029838 | 4930453N24Rik | UP   |
| 49.34515 | -2.51289 | 0.823846 | -3.0502  | 0.002287 | 0.029859 | Slf1          | DOWN |
| 117.9566 | -3.49191 | 1.145308 | -3.04889 | 0.002297 | 0.029965 | Xrn2          | DOWN |
| 1319.547 | 6.58418  | 2.159872 | 3.048412 | 0.002301 | 0.029978 | Crlf3         | UP   |
| 2217.208 | -6.39756 | 2.098847 | -3.04813 | 0.002303 | 0.029978 | Grpel1        | DOWN |
| 161.6176 | -4.10066 | 1.34536  | -3.048   | 0.002304 | 0.029978 | Sos1          | DOWN |
| 979.4387 | -6.66982 | 2.188692 | -3.0474  | 0.002308 | 0.030014 | Zfp422        | DOWN |
| 1034.544 | 6.524719 | 2.141586 | 3.046676 | 0.002314 | 0.030061 | Pak1          | UP   |
| 1653.293 | -7.11621 | 2.336182 | -3.04609 | 0.002318 | 0.030095 | Zbtb17        | DOWN |
| 50.20082 | -2.07085 | 0.679979 | -3.04546 | 0.002323 | 0.03011  | Mtch1         | DOWN |
| 2643.215 | 6.558389 | 2.153511 | 3.045441 | 0.002323 | 0.03011  | U2surp        | UP   |
| 298.0638 | 5.467514 | 1.795727 | 3.044735 | 0.002329 | 0.030121 | Cd34          | UP   |
| 1821.535 | -5.5474  | 1.822048 | -3.04459 | 0.00233  | 0.030121 | Klh19         | DOWN |
| 295.7737 | 5.400318 | 1.773659 | 3.044733 | 0.002329 | 0.030121 | Xaf1          | UP   |
| 397.476  | -5.36711 | 1.763484 | -3.04347 | 0.002339 | 0.030209 | Gtf2h2        | DOWN |
| 1849.326 | -6.58498 | 2.164025 | -3.04293 | 0.002343 | 0.030238 | Slc12a6       | DOWN |
| 32.8635  | -2.39666 | 0.787822 | -3.04214 | 0.002349 | 0.030293 | Mcm5          | DOWN |
| 1006.462 | 6.126096 | 2.014956 | 3.040312 | 0.002363 | 0.030452 | Epm2aip1      | UP   |
| 951.8205 | 6.478483 | 2.131801 | 3.038972 | 0.002374 | 0.030563 | Snrk          | UP   |
| 191.4235 | 4.950551 | 1.629192 | 3.038654 | 0.002376 | 0.03057  | S100a16       | UP   |
| 758.6512 | -6.28088 | 2.067173 | -3.03839 | 0.002378 | 0.030572 | Stard8        | DOWN |
| 602.6356 | -6.22281 | 2.048313 | -3.03802 | 0.002381 | 0.030585 | Ldlrad3       | DOWN |
| 2508.713 | 6.570046 | 2.163435 | 3.036859 | 0.002391 | 0.030652 | Setd7         | UP   |
| 107.6912 | 3.947948 | 1.299997 | 3.036891 | 0.00239  | 0.030652 | Trim30a       | UP   |
| 1445.163 | 6.407232 | 2.110107 | 3.036449 | 0.002394 | 0.030669 | Ptpn1         | UP   |
| 260.3907 | -6.10197 | 2.009761 | -3.03617 | 0.002396 | 0.030673 | Serp2         | DOWN |
| 2008.628 | 6.534945 | 2.153094 | 3.035142 | 0.002404 | 0.030752 | Adsl          | UP   |
| 96.19521 | -3.07251 | 1.012407 | -3.03485 | 0.002407 | 0.030757 | Trappc2       | DOWN |
| 1480.178 | 5.317064 | 1.753237 | 3.032713 | 0.002424 | 0.030825 | Bclaf1        | UP   |
| 874.5355 | 6.790181 | 2.238534 | 3.033315 | 0.002419 | 0.030825 | Endog         | UP   |
| 171.9654 | 4.661328 | 1.536699 | 3.033339 | 0.002419 | 0.030825 | Gm43775       | UP   |
| 2206.017 | 6.55935  | 2.162731 | 3.032901 | 0.002422 | 0.030825 | Gna11         | UP   |
| 995.5865 | 6.219519 | 2.050323 | 3.033434 | 0.002418 | 0.030825 | Ptpn12        | UP   |
| 1954.598 | -5.62832 | 1.855669 | -3.03304 | 0.002421 | 0.030825 | Rbbp7         | DOWN |
| 218.3155 | 4.523798 | 1.491813 | 3.032417 | 0.002426 | 0.03083  | Mbn13         | UP   |

|          |          |          |          |          |          |            |      |
|----------|----------|----------|----------|----------|----------|------------|------|
| 895.1841 | -6.33687 | 2.090225 | -3.03167 | 0.002432 | 0.030882 | Lsm3       | DOWN |
| 223.7039 | -4.93028 | 1.627434 | -3.02948 | 0.00245  | 0.031075 | Hnrnph3    | DOWN |
| 2865.93  | 6.377219 | 2.105181 | 3.029297 | 0.002451 | 0.031075 | Itga6      | UP   |
| 632.9068 | -5.68792 | 1.877873 | -3.02892 | 0.002454 | 0.031089 | Mad211     | DOWN |
| 1152.295 | -6.73416 | 2.223998 | -3.02795 | 0.002462 | 0.031164 | Faim       | DOWN |
| 338.4404 | -5.35874 | 1.769996 | -3.02755 | 0.002465 | 0.031181 | Mettl4     | DOWN |
| 515.9972 | -5.82128 | 1.923096 | -3.02704 | 0.00247  | 0.031185 | Dtwd2      | DOWN |
| 2158.258 | 6.762318 | 2.233984 | 3.027021 | 0.00247  | 0.031185 | Smad3      | UP   |
| 153.6214 | -4.09593 | 1.35335  | -3.02651 | 0.002474 | 0.031212 | Eci2       | DOWN |
| 1389.612 | 6.670145 | 2.20455  | 3.025626 | 0.002481 | 0.031279 | Ndufb6     | UP   |
| 260.5322 | -4.3029  | 1.423561 | -3.02263 | 0.002506 | 0.031435 | Ap3s2      | DOWN |
| 19.50749 | -2.57707 | 0.852413 | -3.02327 | 0.002501 | 0.031435 | Crtap      | DOWN |
| 1189.734 | -6.43058 | 2.127385 | -3.02276 | 0.002505 | 0.031435 | Fbxw11     | DOWN |
| 2983.285 | 6.294037 | 2.082447 | 3.022423 | 0.002508 | 0.031435 | Jarid2     | UP   |
| 1042.717 | -6.39085 | 2.114465 | -3.02244 | 0.002507 | 0.031435 | Slc18b1    | DOWN |
| 590.4147 | 5.972849 | 1.975409 | 3.023602 | 0.002498 | 0.031435 | Tcaim      | UP   |
| 3525.626 | 5.534525 | 1.830421 | 3.023635 | 0.002498 | 0.031435 | Usp22      | UP   |
| 15.83507 | -3.10285 | 1.026908 | -3.02154 | 0.002515 | 0.031501 | Gml4410    | DOWN |
| 1528.279 | 6.949647 | 2.300344 | 3.021134 | 0.002518 | 0.031519 | Tmem250-ps | UP   |
| 1800.279 | 6.312283 | 2.0897   | 3.020665 | 0.002522 | 0.031543 | Sart3      | UP   |
| 339.2547 | 5.46878  | 1.810831 | 3.020039 | 0.002527 | 0.031558 | Dnlz       | UP   |
| 239.331  | 5.276009 | 1.746873 | 3.020259 | 0.002526 | 0.031558 | Mutyh      | UP   |
| 184.5357 | 4.231263 | 1.401412 | 3.019286 | 0.002534 | 0.031611 | Nkapd1     | UP   |
| 668.9303 | -5.91229 | 1.958468 | -3.01883 | 0.002538 | 0.031633 | Mybl1      | DOWN |
| 2345.103 | 6.394277 | 2.118472 | 3.018344 | 0.002542 | 0.031659 | Zfp217     | UP   |
| 1327.169 | -6.42277 | 2.128269 | -3.01784 | 0.002546 | 0.03167  | Plagl1     | DOWN |
| 1421.819 | -6.71187 | 2.224124 | -3.01776 | 0.002547 | 0.03167  | Prkca      | DOWN |
| 46.64259 | -2.3286  | 0.771755 | -3.01728 | 0.002551 | 0.031695 | Gli3       | DOWN |
| 812.0692 | 6.155807 | 2.040441 | 3.016901 | 0.002554 | 0.03171  | Anxa2      | UP   |
| 2890.47  | 6.249294 | 2.072229 | 3.015735 | 0.002564 | 0.031757 | Cald1      | UP   |
| 91.85265 | 3.35888  | 1.113725 | 3.015898 | 0.002562 | 0.031757 | Prmt2      | UP   |
| 2785.327 | 6.513711 | 2.15963  | 3.016123 | 0.00256  | 0.031757 | Ssu72      | UP   |
| 1796.875 | 6.49575  | 2.154124 | 3.015495 | 0.002566 | 0.031757 | Rab3d      | UP   |
| 3206.537 | 6.541149 | 2.169934 | 3.014447 | 0.002574 | 0.031811 | Rae1       | UP   |
| 1072.042 | 6.225573 | 2.06537  | 3.014264 | 0.002576 | 0.031811 | Tmed9      | UP   |
| 519.6982 | 6.135875 | 2.035503 | 3.014427 | 0.002575 | 0.031811 | Tppp3      | UP   |
| 17.72915 | -2.72076 | 0.903122 | -3.01262 | 0.00259  | 0.031909 | Dimt1      | DOWN |
| 1464.206 | 5.964077 | 1.97963  | 3.012723 | 0.002589 | 0.031909 | Hsph1      | UP   |
| 1761.48  | -6.35082 | 2.10776  | -3.01307 | 0.002586 | 0.031909 | Mthfsd     | DOWN |
| 381.6401 | -5.83334 | 1.937281 | -3.0111  | 0.002603 | 0.031916 | Gatb       | DOWN |
| 57.98288 | -2.76846 | 0.919293 | -3.01151 | 0.0026   | 0.031916 | Gm9616     | DOWN |
| 3089.973 | -6.54116 | 2.172502 | -3.01089 | 0.002605 | 0.031916 | Itm2b      | DOWN |
| 983.1535 | -6.40929 | 2.128583 | -3.01106 | 0.002603 | 0.031916 | Nupl2      | DOWN |
| 1456.046 | 6.654089 | 2.209494 | 3.011589 | 0.002599 | 0.031916 | Pcolce     | UP   |
| 2245.839 | 6.914885 | 2.296089 | 3.011593 | 0.002599 | 0.031916 | Samd10     | UP   |
| 3084.317 | 6.158874 | 2.044961 | 3.011731 | 0.002598 | 0.031916 | Tmcc1      | UP   |
| 335.8121 | -5.37688 | 1.785995 | -3.01058 | 0.002607 | 0.031923 | Ppme1      | DOWN |
| 320.8564 | 5.518269 | 1.833483 | 3.009719 | 0.002615 | 0.031967 | Nxn        | UP   |
| 628.1523 | 6.150019 | 2.043401 | 3.009697 | 0.002615 | 0.031967 | Poc1b      | UP   |
| 120.6085 | 3.205373 | 1.065695 | 3.007777 | 0.002632 | 0.032144 | Cirbp      | UP   |
| 1467.55  | 6.428852 | 2.138051 | 3.006875 | 0.002639 | 0.032215 | Mrpl51     | UP   |
| 130.783  | 3.91865  | 1.303832 | 3.005486 | 0.002652 | 0.032287 | Khynyn     | UP   |
| 3046.496 | -5.49007 | 1.82665  | -3.00554 | 0.002651 | 0.032287 | Srsf11     | DOWN |
| 1243.675 | -6.3791  | 2.122317 | -3.00572 | 0.002649 | 0.032287 | Thap1      | DOWN |

|          |          |          |          |          |          |               |      |
|----------|----------|----------|----------|----------|----------|---------------|------|
| 64.49876 | -5.99424 | 1.995042 | -3.00457 | 0.00266  | 0.032309 | Gm48170       | DOWN |
| 1652.35  | 6.239012 | 2.076415 | 3.004704 | 0.002658 | 0.032309 | Tbc1d10b      | UP   |
| 208.8245 | -3.93646 | 1.310093 | -3.00472 | 0.002658 | 0.032309 | Zfp367        | DOWN |
| 666.3862 | -6.00208 | 1.998106 | -3.00389 | 0.002666 | 0.032313 | Pgghg         | DOWN |
| 1405.117 | 6.858419 | 2.283031 | 3.004085 | 0.002664 | 0.032313 | Pygo2         | UP   |
| 14.95797 | 3.16318  | 1.053047 | 3.003835 | 0.002666 | 0.032313 | Vmn2r118      | UP   |
| 1069.688 | -6.4343  | 2.143266 | -3.0021  | 0.002681 | 0.032427 | Fhl4          | DOWN |
| 23.58024 | -2.33268 | 0.776941 | -3.00239 | 0.002679 | 0.032427 | Mindy2        | DOWN |
| 1037.354 | 6.33988  | 2.111847 | 3.002054 | 0.002682 | 0.032427 | Pex1          | UP   |
| 51.24217 | -2.37222 | 0.790432 | -3.00117 | 0.002689 | 0.032496 | Cdk2ap2       | DOWN |
| 524.5943 | -5.93353 | 1.977259 | -3.00088 | 0.002692 | 0.032502 | Vstm4         | DOWN |
| 158.5579 | -4.29037 | 1.429993 | -3.00027 | 0.002697 | 0.032543 | Rnf181        | DOWN |
| 1207.237 | -6.41718 | 2.139389 | -2.99954 | 0.002704 | 0.032571 | A430035B10Rik | DOWN |
| 1362.879 | -6.41659 | 2.139081 | -2.99969 | 0.002703 | 0.032571 | Dyrk1a        | DOWN |
| 2379.098 | -6.15378 | 2.052818 | -2.99772 | 0.00272  | 0.03274  | Camta1        | DOWN |
| 4531.298 | -6.16633 | 2.058503 | -2.99554 | 0.00274  | 0.032929 | Psma7         | DOWN |
| 642.9439 | -5.79996 | 1.936218 | -2.99551 | 0.00274  | 0.032929 | Vps37a        | DOWN |
| 3160.429 | 6.290882 | 2.100845 | 2.994453 | 0.002749 | 0.033018 | Epb4115       | UP   |
| 1631.36  | -6.17518 | 2.062531 | -2.99398 | 0.002754 | 0.033043 | Ncor1         | DOWN |
| 3743.274 | -5.58275 | 1.86491  | -2.99358 | 0.002757 | 0.033051 | Fam168b       | DOWN |
| 14.22487 | 3.049991 | 1.018967 | 2.993218 | 0.002761 | 0.033051 | Kcnj2         | UP   |
| 252.0156 | -4.87108 | 1.627292 | -2.99337 | 0.002759 | 0.033051 | Prpf38a       | DOWN |
| 1370.064 | -5.36709 | 1.793587 | -2.99238 | 0.002768 | 0.033083 | Mphosph6      | DOWN |
| 1344.486 | 6.502032 | 2.172977 | 2.992223 | 0.00277  | 0.033083 | Pcmt1         | UP   |
| 2525.668 | 6.490019 | 2.168781 | 2.992473 | 0.002767 | 0.033083 | Slc4alap      | UP   |
| 22.98547 | -3.06401 | 1.024177 | -2.99168 | 0.002774 | 0.033096 | Gm3333        | DOWN |
| 432.0391 | -5.58498 | 1.866867 | -2.99163 | 0.002775 | 0.033096 | Txn1          | DOWN |
| 521.3097 | 6.051735 | 2.023128 | 2.991277 | 0.002778 | 0.03311  | Pop4          | UP   |
| 661.0032 | 6.072402 | 2.030297 | 2.990893 | 0.002782 | 0.033127 | Rdh10         | UP   |
| 1936.77  | 5.769103 | 1.929213 | 2.990392 | 0.002786 | 0.033131 | Foxj3         | UP   |
| 3325.897 | 6.162346 | 2.060628 | 2.990518 | 0.002785 | 0.033131 | Usp34         | UP   |
| 1412.27  | -6.73272 | 2.253049 | -2.98827 | 0.002806 | 0.033311 | 2210016L21Rik | DOWN |
| 2088.993 | 6.328731 | 2.117763 | 2.988404 | 0.002804 | 0.033311 | Zzz3          | UP   |
| 145.93   | -4.5903  | 1.536575 | -2.98736 | 0.002814 | 0.033335 | Atp6ap1       | DOWN |
| 1038.419 | 5.414936 | 1.812528 | 2.987505 | 0.002813 | 0.033335 | Brd2          | UP   |
| 32.17419 | 2.58443  | 0.865011 | 2.987743 | 0.00281  | 0.033335 | Mfap4         | UP   |
| 1294.696 | 6.197109 | 2.074638 | 2.98708  | 0.002817 | 0.033341 | B230219D22Rik | UP   |
| 2192.857 | 6.36018  | 2.129986 | 2.98602  | 0.002826 | 0.03337  | Itpkb         | UP   |
| 2470.078 | 5.188051 | 1.737522 | 2.985892 | 0.002828 | 0.03337  | Matr3         | UP   |
| 22.78466 | -2.42476 | 0.8119   | -2.98652 | 0.002822 | 0.03337  | Mrps15        | DOWN |
| 1777.638 | 6.300126 | 2.109878 | 2.986014 | 0.002826 | 0.03337  | Ube2j2        | UP   |
| 779.8689 | -6.03821 | 2.022756 | -2.98514 | 0.002834 | 0.033427 | AW549877      | DOWN |
| 67.09608 | 3.155951 | 1.057908 | 2.983198 | 0.002853 | 0.033524 | Dtd2          | UP   |
| 2254.525 | -6.58851 | 2.209115 | -2.98242 | 0.00286  | 0.033524 | Ei24          | DOWN |
| 959.2253 | 5.306654 | 1.778706 | 2.983436 | 0.00285  | 0.033524 | Esrp1         | UP   |
| 12.86389 | 3.731657 | 1.250654 | 2.983765 | 0.002847 | 0.033524 | Gm11851       | UP   |
| 103.9071 | -3.8543  | 1.292088 | -2.983   | 0.002854 | 0.033524 | Gm715         | DOWN |
| 1240.885 | 6.132772 | 2.055293 | 2.983892 | 0.002846 | 0.033524 | Micul         | UP   |
| 1440.94  | 6.217283 | 2.084643 | 2.982421 | 0.00286  | 0.033524 | Ralgapa1      | UP   |
| 299.9605 | 5.163865 | 1.731409 | 2.982463 | 0.002859 | 0.033524 | Terb1         | UP   |
| 1027.44  | -6.11997 | 2.053383 | -2.98043 | 0.002878 | 0.033717 | Zfp444        | DOWN |
| 723.4299 | 5.900874 | 1.980322 | 2.979755 | 0.002885 | 0.033761 | Lhx8          | UP   |
| 1982.138 | 6.569805 | 2.20494  | 2.979584 | 0.002886 | 0.033761 | Snx9          | UP   |
| 13.47211 | -3.37152 | 1.13173  | -2.97908 | 0.002891 | 0.033791 | Cnksr3        | DOWN |

|          |          |          |          |          |          |               |      |
|----------|----------|----------|----------|----------|----------|---------------|------|
| 20.34194 | -2.87206 | 0.964251 | -2.97854 | 0.002896 | 0.0338   | Idi1          | DOWN |
| 2033.852 | 6.293355 | 2.112814 | 2.978661 | 0.002895 | 0.0338   | Senp2         | UP   |
| 22.9047  | 2.254541 | 0.757435 | 2.976546 | 0.002915 | 0.033971 | Calhm4        | UP   |
| 693.9723 | 6.12838  | 2.058772 | 2.976715 | 0.002914 | 0.033971 | Kctd9         | UP   |
| 409.6597 | -5.9081  | 1.985541 | -2.97556 | 0.002925 | 0.03403  | Ccdc126       | DOWN |
| 29.06418 | -2.60975 | 0.877062 | -2.97556 | 0.002925 | 0.03403  | Socs1         | DOWN |
| 1844.025 | -6.56908 | 2.208796 | -2.97405 | 0.002939 | 0.034172 | Itgb3         | DOWN |
| 2538.705 | 6.333361 | 2.129828 | 2.973648 | 0.002943 | 0.034192 | Acdb3         | UP   |
| 240.5154 | -5.05129 | 1.6994   | -2.9724  | 0.002955 | 0.034306 | Fam217a       | DOWN |
| 1842.115 | -6.28699 | 2.116955 | -2.96983 | 0.00298  | 0.034547 | Bmp1          | DOWN |
| 1277.895 | 6.019774 | 2.027002 | 2.969792 | 0.00298  | 0.034547 | Piwil2        | UP   |
| 585.954  | 5.441605 | 1.832506 | 2.969489 | 0.002983 | 0.034556 | Ociad1        | UP   |
| 20.37534 | 2.681169 | 0.903464 | 2.967656 | 0.003001 | 0.034686 | Ccno          | UP   |
| 543.3693 | -5.79258 | 1.951696 | -2.96797 | 0.002998 | 0.034686 | Nphp1         | DOWN |
| 4764.024 | 5.179539 | 1.745234 | 2.96782  | 0.002999 | 0.034686 | Rest          | UP   |
| 12.58881 | -3.38462 | 1.140666 | -2.96723 | 0.003005 | 0.034708 | E430024P14Rik | DOWN |
| 47.48567 | 1.933153 | 0.65176  | 2.966048 | 0.003017 | 0.034816 | Nexmif        | UP   |
| 2613.579 | 6.162799 | 2.078859 | 2.964511 | 0.003032 | 0.034965 | Lrba          | UP   |
| 355.6941 | -5.43554 | 1.834084 | -2.96362 | 0.00304  | 0.035015 | Sema6d        | DOWN |
| 355.2874 | -5.08016 | 1.714106 | -2.96374 | 0.003039 | 0.035015 | Slc44a1       | DOWN |
| 67.9199  | -2.87182 | 0.969583 | -2.96191 | 0.003057 | 0.035165 | Prickle1      | DOWN |
| 2048.871 | -6.19534 | 2.091706 | -2.96186 | 0.003058 | 0.035165 | Ralbp1        | DOWN |
| 1165.825 | 6.395002 | 2.159392 | 2.961483 | 0.003062 | 0.035182 | Mrpl11        | UP   |
| 1358.799 | 6.509494 | 2.198264 | 2.961198 | 0.003064 | 0.035189 | Becn1         | UP   |
| 868.8388 | 5.982242 | 2.020607 | 2.960615 | 0.00307  | 0.03521  | Gramd4        | UP   |
| 33.5862  | -2.04504 | 0.690761 | -2.96056 | 0.003071 | 0.03521  | Pwwp2b        | DOWN |
| 525.6659 | -5.58929 | 1.888458 | -2.95971 | 0.003079 | 0.035258 | Cyb5b         | DOWN |
| 22.07945 | 2.281011 | 0.770693 | 2.959689 | 0.003079 | 0.035258 | Slc17a2       | UP   |
| 316.2974 | 5.02143  | 1.696894 | 2.959189 | 0.003084 | 0.035269 | Grb7          | UP   |
| 740.8225 | -5.95444 | 2.012393 | -2.95889 | 0.003088 | 0.035269 | Myl12a        | DOWN |
| 229.051  | -4.80256 | 1.623201 | -2.9587  | 0.003089 | 0.035269 | Ppp2cb        | DOWN |
| 300.3973 | 5.452868 | 1.842835 | 2.958956 | 0.003087 | 0.035269 | Rilpl1        | UP   |
| 321.0421 | -5.12585 | 1.732775 | -2.95817 | 0.003095 | 0.035278 | Cep41         | DOWN |
| 720.4486 | -6.04836 | 2.044538 | -2.9583  | 0.003093 | 0.035278 | Wdr91         | DOWN |
| 2002.714 | 6.50831  | 2.200657 | 2.95744  | 0.003102 | 0.035336 | Ndufs2        | UP   |
| 378.7919 | 5.459999 | 1.846449 | 2.957026 | 0.003106 | 0.035346 | Ctdpl         | UP   |
| 978.3358 | 6.279408 | 2.123713 | 2.956806 | 0.003108 | 0.035346 | Sgta          | UP   |
| 185.3603 | -3.92108 | 1.326174 | -2.95669 | 0.00311  | 0.035346 | Xrcc6         | DOWN |
| 821.2225 | 5.607993 | 1.897615 | 2.955285 | 0.003124 | 0.03543  | Pik3r4        | UP   |
| 86.18731 | -3.32504 | 1.124969 | -2.95568 | 0.00312  | 0.03543  | Tipr1         | DOWN |
| 425.6908 | 5.578576 | 1.887588 | 2.955399 | 0.003123 | 0.03543  | Zfp574        | UP   |
| 1454.89  | 6.290444 | 2.128998 | 2.95465  | 0.00313  | 0.035452 | Acs11         | UP   |
| 1944.674 | -6.25378 | 2.116558 | -2.95469 | 0.00313  | 0.035452 | Rhbdf1        | DOWN |
| 629.1594 | -5.99017 | 2.028036 | -2.95368 | 0.00314  | 0.035538 | Cdc123        | DOWN |
| 24.05456 | -2.50119 | 0.847064 | -2.95277 | 0.003149 | 0.035617 | Tmem128       | DOWN |
| 1708.494 | 6.342556 | 2.148217 | 2.952475 | 0.003152 | 0.035626 | Zbtb7a        | UP   |
| 1380.583 | 6.468012 | 2.191081 | 2.951972 | 0.003158 | 0.035658 | Chchd1        | UP   |
| 935.7578 | 6.10926  | 2.069743 | 2.9517   | 0.00316  | 0.035664 | Ppp2r3d       | UP   |
| 872.4281 | -5.96934 | 2.022692 | -2.95119 | 0.003166 | 0.035698 | Stau1         | DOWN |
| 1639.452 | -6.31346 | 2.14028  | -2.94983 | 0.003179 | 0.035787 | Hsd12         | DOWN |
| 6923.397 | -5.23056 | 1.773355 | -2.94953 | 0.003183 | 0.035787 | Oip5os1       | DOWN |
| 1425.24  | 6.441316 | 2.183844 | 2.949531 | 0.003183 | 0.035787 | Pacsin2       | UP   |
| 200.1321 | -4.17587 | 1.415681 | -2.94973 | 0.003181 | 0.035787 | Stt3b         | DOWN |
| 1800.27  | 6.462746 | 2.192537 | 2.947611 | 0.003202 | 0.035984 | Eef2k         | UP   |



|          |          |          |          |          |          |          |      |
|----------|----------|----------|----------|----------|----------|----------|------|
| 1121.505 | -6.1365  | 2.083173 | -2.94575 | 0.003222 | 0.036176 | Ndufb8   | DOWN |
| 732.6447 | -6.46146 | 2.194522 | -2.94436 | 0.003236 | 0.036313 | Phf11d   | DOWN |
| 27.86376 | 2.396523 | 0.814114 | 2.943718 | 0.003243 | 0.036362 | Ilvbl    | UP   |
| 520.2357 | -5.49968 | 1.868578 | -2.94324 | 0.003248 | 0.036392 | Zfp729a  | DOWN |
| 175.4212 | -3.84153 | 1.305539 | -2.94249 | 0.003256 | 0.036455 | Gars     | DOWN |
| 1292.871 | 6.145722 | 2.088877 | 2.942117 | 0.00326  | 0.036472 | Cramp11  | UP   |
| 145.6706 | 4.163192 | 1.41594  | 2.940233 | 0.00328  | 0.036539 | Fam207a  | UP   |
| 723.665  | -6.10321 | 2.075742 | -2.94025 | 0.003279 | 0.036539 | Fbxo30   | DOWN |
| 1642.684 | 6.478194 | 2.203271 | 2.940262 | 0.003279 | 0.036539 | Gm1673   | UP   |
| 1876.558 | 6.330597 | 2.152746 | 2.940708 | 0.003275 | 0.036539 | Kdm1b    | UP   |
| 453.7966 | -5.70539 | 1.940129 | -2.94073 | 0.003274 | 0.036539 | Klh17    | DOWN |
| 1885.623 | -6.28389 | 2.136873 | -2.94069 | 0.003275 | 0.036539 | Ulk4     | DOWN |
| 739.2967 | 5.946015 | 2.022675 | 2.939679 | 0.003286 | 0.036552 | Pi4k2b   | UP   |
| 521.6647 | 5.887308 | 2.002555 | 2.939898 | 0.003283 | 0.036552 | Styx11   | UP   |
| 869.9079 | -5.96904 | 2.030678 | -2.93943 | 0.003288 | 0.036556 | Slc4a2   | DOWN |
| 1236.867 | 5.145437 | 1.750821 | 2.938872 | 0.003294 | 0.036578 | Fxr1     | UP   |
| 712.1027 | -6.068   | 2.064783 | -2.93881 | 0.003295 | 0.036578 | Ppid     | DOWN |
| 1132.802 | 6.635383 | 2.258443 | 2.938034 | 0.003303 | 0.036617 | Crlf2    | UP   |
| 360.136  | 5.536962 | 1.884575 | 2.938043 | 0.003303 | 0.036617 | Slc47a2  | UP   |
| 623.4251 | 5.871612 | 1.999631 | 2.936348 | 0.003321 | 0.036791 | Lmbrd1   | UP   |
| 535.7986 | 5.748975 | 1.958628 | 2.935204 | 0.003333 | 0.036901 | Dsg2     | UP   |
| 1234.818 | 6.175073 | 2.104179 | 2.934671 | 0.003339 | 0.036935 | Eif31    | UP   |
| 26.62378 | 2.102245 | 0.716395 | 2.934477 | 0.003341 | 0.036935 | Podxl2   | UP   |
| 979.0997 | 6.23623  | 2.125615 | 2.933847 | 0.003348 | 0.036974 | Eif3h    | UP   |
| 187.9893 | 4.712388 | 1.606285 | 2.933719 | 0.003349 | 0.036974 | Fhl2     | UP   |
| 640.6466 | -5.98251 | 2.039549 | -2.93325 | 0.003354 | 0.037003 | Nup62    | DOWN |
| 1903.271 | -6.18378 | 2.108377 | -2.93296 | 0.003358 | 0.037013 | Atg4b    | DOWN |
| 3471.333 | 5.805715 | 1.979908 | 2.932316 | 0.003364 | 0.037063 | Tbca     | UP   |
| 780.1336 | -6.24405 | 2.129602 | -2.93203 | 0.003368 | 0.037072 | Sec61a2  | DOWN |
| 207.3104 | -4.65935 | 1.589786 | -2.9308  | 0.003381 | 0.037127 | Gna12    | DOWN |
| 52.24407 | -2.01681 | 0.688096 | -2.931   | 0.003379 | 0.037127 | Kpna2    | DOWN |
| 16.11769 | -2.99403 | 1.021497 | -2.93102 | 0.003379 | 0.037127 | Rps2-ps7 | DOWN |
| 2488.103 | -6.09788 | 2.080698 | -2.93069 | 0.003382 | 0.037127 | Sipa111  | DOWN |
| 81.91892 | -3.72699 | 1.271987 | -2.93006 | 0.003389 | 0.037152 | Fdps     | DOWN |
| 653.527  | 4.884365 | 1.66699  | 2.930051 | 0.003389 | 0.037152 | Tnks     | UP   |
| 616.2348 | 5.053064 | 1.724814 | 2.929628 | 0.003394 | 0.037177 | Zcchc2   | UP   |
| 4307.886 | 5.446545 | 1.859541 | 2.928973 | 0.003401 | 0.037229 | Tex15    | UP   |
| 1846.007 | 6.32498  | 2.159632 | 2.928731 | 0.003403 | 0.037232 | Drosha   | UP   |
| 43.48522 | 2.710711 | 0.925663 | 2.928398 | 0.003407 | 0.037246 | Oaz2     | UP   |
| 290.1878 | 5.067775 | 1.731291 | 2.927166 | 0.003421 | 0.037368 | Chchd6   | UP   |
| 1001.335 | -6.11542 | 2.089522 | -2.92671 | 0.003426 | 0.037381 | Lanc11   | DOWN |
| 896.681  | -5.20158 | 1.777331 | -2.92662 | 0.003427 | 0.037381 | Ube2i    | DOWN |
| 1464.048 | 6.312437 | 2.157069 | 2.926395 | 0.003429 | 0.037383 | Mcp1     | UP   |
| 454.4365 | -5.68703 | 1.943519 | -2.92615 | 0.003432 | 0.037386 | Timm23   | DOWN |
| 220.8065 | -4.33071 | 1.480273 | -2.92562 | 0.003438 | 0.037425 | Hmces    | DOWN |
| 285.8218 | -5.05252 | 1.727294 | -2.92511 | 0.003443 | 0.03746  | Gas2     | DOWN |
| 6662.622 | 4.810269 | 1.644633 | 2.924829 | 0.003446 | 0.037468 | H19      | UP   |
| 53.36528 | -2.38874 | 0.816782 | -2.92457 | 0.003449 | 0.037473 | Cyp4f17  | DOWN |
| 2979.764 | 6.355592 | 2.173372 | 2.9243   | 0.003452 | 0.03748  | Ncapg    | UP   |
| 471.3216 | 4.966485 | 1.698629 | 2.923819 | 0.003458 | 0.037486 | Nme1     | UP   |
| 1521.205 | 6.517911 | 2.229109 | 2.923999 | 0.003456 | 0.037486 | Rad50    | UP   |
| 1613.561 | 6.055749 | 2.07186  | 2.922856 | 0.003468 | 0.037576 | Snrnp70  | UP   |
| 925.0748 | -5.85858 | 2.005183 | -2.92172 | 0.003481 | 0.037688 | Fkbp3    | DOWN |
| 2338.518 | 6.368617 | 2.180231 | 2.921075 | 0.003488 | 0.037737 | Bmpr1a   | UP   |

|          |          |          |          |          |          |               |      |
|----------|----------|----------|----------|----------|----------|---------------|------|
| 126.1837 | -3.9439  | 1.350241 | -2.92088 | 0.00349  | 0.037737 | Dusp10        | DOWN |
| 1465.883 | 6.854472 | 2.346941 | 2.920598 | 0.003494 | 0.037745 | Mfsd1         | UP   |
| 23.93034 | -2.21064 | 0.757147 | -2.91971 | 0.003504 | 0.037828 | Nup35         | DOWN |
| 1389.211 | 6.561417 | 2.24774  | 2.919117 | 0.00351  | 0.037873 | Hacd1         | UP   |
| 689.9554 | -6.0411  | 2.069882 | -2.91857 | 0.003516 | 0.037913 | Cstf3         | DOWN |
| 733.2054 | -5.74059 | 1.967083 | -2.91833 | 0.003519 | 0.037917 | Zfp704        | DOWN |
| 2452.231 | 6.412136 | 2.198124 | 2.917095 | 0.003533 | 0.038041 | Nfrkb         | UP   |
| 1068.932 | -6.00437 | 2.058948 | -2.91623 | 0.003543 | 0.038087 | Polr3h        | DOWN |
| 1052.444 | -5.62942 | 1.930552 | -2.91596 | 0.003546 | 0.038087 | Rheb          | DOWN |
| 1923.682 | 6.242304 | 2.140804 | 2.915869 | 0.003547 | 0.038087 | St7           | UP   |
| 474.5947 | 5.581527 | 1.913907 | 2.9163   | 0.003542 | 0.038087 | Zfp280b       | UP   |
| 203.9907 | 5.208337 | 1.786541 | 2.915318 | 0.003553 | 0.038128 | I700007K13Rik | UP   |
| 476.1595 | -5.75654 | 1.974947 | -2.91478 | 0.003559 | 0.038168 | Sdhaf3        | DOWN |
| 828.8904 | -5.93424 | 2.037148 | -2.91301 | 0.00358  | 0.038332 | Ghitm         | DOWN |
| 65.1431  | -2.66562 | 0.915046 | -2.9131  | 0.003579 | 0.038332 | Zfp9          | DOWN |
| 76.61662 | -3.06788 | 1.053347 | -2.91251 | 0.003585 | 0.038365 | Atp6v1f       | DOWN |
| 790.1525 | -5.23114 | 1.796212 | -2.91232 | 0.003588 | 0.038365 | Tex264        | DOWN |
| 621.9257 | 5.817649 | 1.998158 | 2.911506 | 0.003597 | 0.038439 | Cld           | UP   |
| 1018.743 | -5.97032 | 2.051409 | -2.91035 | 0.00361  | 0.038555 | Abcg2         | DOWN |
| 234.7901 | -5.03775 | 1.732219 | -2.90826 | 0.003634 | 0.038787 | Ppt1          | DOWN |
| 276.7123 | -4.1979  | 1.444542 | -2.90604 | 0.00366  | 0.039037 | Hbp1          | DOWN |
| 44.27684 | 2.190066 | 0.753813 | 2.905319 | 0.003669 | 0.039066 | Jun           | UP   |
| 453.8431 | 5.437517 | 1.871483 | 2.905459 | 0.003667 | 0.039066 | Rgl2          | UP   |
| 2011.291 | 6.169558 | 2.123648 | 2.90517  | 0.003671 | 0.039066 | Rpl22         | UP   |
| 291.5635 | -5.51768 | 1.900209 | -2.90372 | 0.003688 | 0.039221 | Slc35a1       | DOWN |
| 485.6642 | -5.72739 | 1.973373 | -2.90234 | 0.003704 | 0.039368 | Snip1         | DOWN |
| 659.3879 | 6.084598 | 2.096607 | 2.902116 | 0.003707 | 0.039369 | Otulin        | UP   |
| 2892.544 | 6.064671 | 2.090256 | 2.901402 | 0.003715 | 0.039432 | Ralgps2       | UP   |
| 1312.254 | 6.420531 | 2.213244 | 2.900959 | 0.00372  | 0.039461 | Sirpa         | UP   |
| 1264.589 | 6.310676 | 2.176935 | 2.898881 | 0.003745 | 0.039644 | Ctc1          | UP   |
| 1085.787 | 5.976685 | 2.061677 | 2.898943 | 0.003744 | 0.039644 | Rbm22         | UP   |
| 789.3628 | -6.36264 | 2.194662 | -2.89914 | 0.003742 | 0.039644 | Zfp760        | DOWN |
| 96.25297 | 3.317843 | 1.144671 | 2.898513 | 0.003749 | 0.039664 | Ccdc149       | UP   |
| 615.7417 | -5.89616 | 2.034665 | -2.89785 | 0.003757 | 0.03972  | Zcchc10       | DOWN |
| 897.5165 | 5.919036 | 2.042735 | 2.897604 | 0.00376  | 0.039725 | Mob1a         | UP   |
| 1381.381 | -5.98868 | 2.068886 | -2.89464 | 0.003796 | 0.040075 | Ptptra        | DOWN |
| 2417.038 | -6.50441 | 2.247373 | -2.89423 | 0.003801 | 0.040101 | Intu          | DOWN |
| 250.2965 | 4.553747 | 1.573907 | 2.893277 | 0.003812 | 0.040196 | Thop1         | UP   |
| 2351.894 | 6.23708  | 2.156582 | 2.892113 | 0.003827 | 0.040318 | Phf3          | UP   |
| 1760.505 | -6.25306 | 2.162318 | -2.89183 | 0.00383  | 0.040327 | Zfp821        | DOWN |
| 1633.794 | 6.217701 | 2.150581 | 2.891173 | 0.003838 | 0.040385 | Cep290        | UP   |
| 2025.403 | 6.091087 | 2.107067 | 2.890789 | 0.003843 | 0.040407 | Fbn2          | UP   |
| 843.6745 | -5.68368 | 1.96653  | -2.89021 | 0.00385  | 0.040455 | Ndufb9        | DOWN |
| 73.09293 | 2.901762 | 1.004161 | 2.889737 | 0.003856 | 0.040488 | Wdr89         | UP   |
| 850.9765 | 6.156532 | 2.131181 | 2.888789 | 0.003867 | 0.040583 | Mrpl12        | UP   |
| 39.75048 | 2.512823 | 0.871131 | 2.884554 | 0.00392  | 0.041106 | Plod3         | UP   |
| 21.29872 | 2.45484  | 0.851254 | 2.883793 | 0.003929 | 0.041178 | Tyrobp        | UP   |
| 800.6271 | 5.776676 | 2.003339 | 2.883524 | 0.003933 | 0.041185 | Fxr2          | UP   |
| 1265.56  | -6.06101 | 2.102847 | -2.88229 | 0.003948 | 0.041237 | Apc           | DOWN |
| 338.8549 | 5.33655  | 1.852008 | 2.881494 | 0.003958 | 0.041237 | Dach1         | UP   |
| 185.0593 | -4.17314 | 1.44819  | -2.88163 | 0.003956 | 0.041237 | Eif2s1        | DOWN |
| 600.4248 | 6.020773 | 2.08867  | 2.882586 | 0.003944 | 0.041237 | Mreg          | UP   |
| 77.48524 | -2.6288  | 0.912318 | -2.88145 | 0.003958 | 0.041237 | Naa25         | DOWN |
| 3680.498 | 6.16122  | 2.137764 | 2.882086 | 0.003951 | 0.041237 | Nexn          | UP   |

|          |          |          |          |          |          |               |      |
|----------|----------|----------|----------|----------|----------|---------------|------|
| 817.0375 | -6.04999 | 2.098896 | -2.88247 | 0.003946 | 0.041237 | Pmp22         | DOWN |
| 99.47506 | -3.25634 | 1.129874 | -2.88204 | 0.003951 | 0.041237 | Tex9          | DOWN |
| 489.3666 | 5.617873 | 1.94999  | 2.880975 | 0.003964 | 0.041272 | Vat1          | UP   |
| 1460.015 | -5.5982  | 1.945277 | -2.87784 | 0.004004 | 0.041657 | S100pbp       | DOWN |
| 858.8938 | -5.84246 | 2.031087 | -2.87652 | 0.004021 | 0.041804 | Hadhb         | DOWN |
| 794.1218 | -5.84382 | 2.032599 | -2.87505 | 0.00404  | 0.04194  | Dpy30         | DOWN |
| 128.0361 | -3.43705 | 1.19555  | -2.87487 | 0.004042 | 0.04194  | Mis18bp1      | DOWN |
| 127.4518 | -3.8782  | 1.348963 | -2.87495 | 0.004041 | 0.04194  | Pipox         | DOWN |
| 1696.939 | 6.068465 | 2.111041 | 2.874632 | 0.004045 | 0.041944 | Tom112        | UP   |
| 25.05593 | -2.66461 | 0.92733  | -2.87342 | 0.004061 | 0.042078 | Gm10699       | DOWN |
| 1727.049 | 6.405378 | 2.229441 | 2.873087 | 0.004065 | 0.042094 | Pin1          | UP   |
| 31.79485 | -2.01775 | 0.702367 | -2.87278 | 0.004069 | 0.042107 | Srrm4         | DOWN |
| 14.87263 | -2.78574 | 0.970255 | -2.87114 | 0.00409  | 0.04227  | Mtpn          | DOWN |
| 559.6135 | -4.99597 | 1.740057 | -2.87115 | 0.00409  | 0.04227  | Zkscan3       | DOWN |
| 1269.601 | 6.165733 | 2.14805  | 2.870386 | 0.0041   | 0.042316 | Gtf2ird2      | UP   |
| 591.3383 | -5.90252 | 2.056318 | -2.87043 | 0.004099 | 0.042316 | Stk17b        | DOWN |
| 196.6883 | -4.65335 | 1.621339 | -2.87006 | 0.004104 | 0.042331 | Oser1         | DOWN |
| 316.6139 | -4.97368 | 1.733264 | -2.86955 | 0.004111 | 0.042373 | Rnft1         | DOWN |
| 2818.684 | 6.179196 | 2.154077 | 2.868605 | 0.004123 | 0.042444 | Serpine2      | UP   |
| 1508.65  | 5.943583 | 2.071923 | 2.868631 | 0.004123 | 0.042444 | Supt6         | UP   |
| 1398.641 | 6.04102  | 2.10668  | 2.867555 | 0.004137 | 0.042484 | Bfar          | UP   |
| 2005.562 | 6.225136 | 2.170946 | 2.867477 | 0.004138 | 0.042484 | Dvl3          | UP   |
| 591.5784 | 6.275868 | 2.18855  | 2.867592 | 0.004136 | 0.042484 | Gpx7          | UP   |
| 1330.639 | 5.051546 | 1.761527 | 2.867708 | 0.004135 | 0.042484 | Ptprf         | UP   |
| 1745.83  | -5.91972 | 2.064981 | -2.86672 | 0.004148 | 0.042558 | Esco2         | DOWN |
| 157.3305 | 4.068536 | 1.419443 | 2.866292 | 0.004153 | 0.042588 | Hdac8         | UP   |
| 250.8762 | -4.26251 | 1.487437 | -2.86568 | 0.004161 | 0.042643 | Ctnnb1        | DOWN |
| 125.8465 | -4.11032 | 1.434474 | -2.86539 | 0.004165 | 0.042654 | 8430429K09Rik | DOWN |
| 678.4268 | 6.041809 | 2.110091 | 2.863294 | 0.004193 | 0.042909 | Stt3a         | UP   |
| 187.0922 | -3.73251 | 1.303786 | -2.86282 | 0.004199 | 0.042945 | Ube2e3        | DOWN |
| 1113.736 | 6.132412 | 2.14283  | 2.861829 | 0.004212 | 0.043024 | Ganab         | UP   |
| 13.73507 | 7.360718 | 2.571913 | 2.861962 | 0.00421  | 0.043024 | Gm22003       | UP   |
| 212.9123 | 4.654457 | 1.626877 | 2.860976 | 0.004223 | 0.043111 | 1700022I11Rik | UP   |
| 1818.384 | 6.289828 | 2.198801 | 2.860572 | 0.004229 | 0.043138 | Vegfb         | UP   |
| 118.9892 | 3.759831 | 1.314474 | 2.860331 | 0.004232 | 0.043143 | Shcbp11       | UP   |
| 1577.925 | 6.121696 | 2.141228 | 2.858965 | 0.00425  | 0.043301 | Banp          | UP   |
| 33.49278 | -2.0401  | 0.713705 | -2.85846 | 0.004257 | 0.043342 | Alpl          | DOWN |
| 772.047  | 4.927463 | 1.724352 | 2.857574 | 0.004269 | 0.043379 | Abl2          | UP   |
| 1165.045 | -5.78792 | 2.025195 | -2.85796 | 0.004264 | 0.043379 | Gapdh         | DOWN |
| 20.31295 | -2.33652 | 0.817604 | -2.85776 | 0.004266 | 0.043379 | Gm32486       | DOWN |
| 515.6791 | 5.538081 | 1.938505 | 2.856883 | 0.004278 | 0.043409 | At13          | UP   |
| 495.7255 | -5.68845 | 1.99129  | -2.85667 | 0.004281 | 0.043409 | Ccdc25        | DOWN |
| 299.4282 | 4.935726 | 1.72754  | 2.857084 | 0.004276 | 0.043409 | Tbrg1         | UP   |
| 1044.636 | -6.06808 | 2.124281 | -2.85653 | 0.004283 | 0.043409 | Zscan29       | DOWN |
| 148.2422 | -3.6762  | 1.287238 | -2.85588 | 0.004292 | 0.043443 | Ppp1r14b      | DOWN |
| 440.3101 | -4.47694 | 1.567613 | -2.85589 | 0.004292 | 0.043443 | Znrf3         | DOWN |
| 1343.812 | 6.157277 | 2.156889 | 2.854702 | 0.004308 | 0.043562 | Arvcf         | UP   |
| 460.4138 | 5.363264 | 1.878815 | 2.854599 | 0.004309 | 0.043562 | Mocs2         | UP   |
| 974.4963 | -5.94472 | 2.082827 | -2.85416 | 0.004315 | 0.043594 | Smyd3         | DOWN |
| 930.1417 | 6.102316 | 2.138964 | 2.852931 | 0.004332 | 0.043707 | Cuta          | UP   |
| 1695.721 | 6.118828 | 2.144682 | 2.853023 | 0.004331 | 0.043707 | Tnpo3         | UP   |
| 1222.127 | 6.213478 | 2.178557 | 2.852108 | 0.004343 | 0.043793 | Stx17         | UP   |
| 1168.139 | 6.169255 | 2.164069 | 2.850767 | 0.004361 | 0.043929 | Jcad          | UP   |
| 29.91509 | -1.94926 | 0.683781 | -2.85071 | 0.004362 | 0.043929 | Xrcc5         | DOWN |

|          |          |          |          |          |          |          |      |
|----------|----------|----------|----------|----------|----------|----------|------|
| 2354.856 | 6.27856  | 2.202815 | 2.850243 | 0.004369 | 0.043957 | Atad1    | UP   |
| 948.9923 | -5.95392 | 2.089067 | -2.85004 | 0.004371 | 0.043957 | Atp5g1   | DOWN |
| 508.0834 | 5.570466 | 1.954664 | 2.849833 | 0.004374 | 0.043957 | Blzf1    | UP   |
| 324.9249 | -4.86015 | 1.705497 | -2.8497  | 0.004376 | 0.043957 | Tpst1    | DOWN |
| 1384.345 | -5.75908 | 2.021303 | -2.84919 | 0.004383 | 0.043996 | Gng5     | DOWN |
| 369.487  | -5.02833 | 1.76494  | -2.84901 | 0.004386 | 0.043996 | Snapin   | DOWN |
| 918.1772 | -5.9865  | 2.101694 | -2.84842 | 0.004394 | 0.044049 | Rad51    | DOWN |
| 408.7957 | -4.87895 | 1.713271 | -2.84774 | 0.004403 | 0.044115 | Ugcg     | DOWN |
| 663.3365 | 5.867299 | 2.061575 | 2.846027 | 0.004427 | 0.044325 | Sirt2    | UP   |
| 345.2223 | -4.72229 | 1.659618 | -2.84541 | 0.004435 | 0.044382 | Pnlsr    | DOWN |
| 35.17461 | -2.12528 | 0.74741  | -2.84353 | 0.004462 | 0.044561 | Fam104a  | DOWN |
| 15.41135 | -2.83204 | 0.99594  | -2.84359 | 0.004461 | 0.044561 | Fam122a  | DOWN |
| 296.1939 | 4.686279 | 1.648032 | 2.843562 | 0.004461 | 0.044561 | Mark1    | UP   |
| 2398.573 | 6.022259 | 2.118615 | 2.842545 | 0.004475 | 0.04467  | Txn11    | UP   |
| 28.27423 | -2.73286 | 0.96153  | -2.8422  | 0.00448  | 0.04469  | Cib2     | DOWN |
| 1284.137 | 5.995506 | 2.110025 | 2.841439 | 0.004491 | 0.04474  | Atp6v0b  | UP   |
| 273.9292 | -4.76781 | 1.677899 | -2.84154 | 0.00449  | 0.04474  | G2e3     | DOWN |
| 1517.952 | 6.34157  | 2.232355 | 2.840754 | 0.004501 | 0.044785 | Eed      | UP   |
| 175.4462 | 4.397511 | 1.548033 | 2.840709 | 0.004501 | 0.044785 | Gm16083  | UP   |
| 932.103  | 5.663573 | 1.994524 | 2.839561 | 0.004518 | 0.044918 | Zfp777   | UP   |
| 1415.893 | -6.04024 | 2.127586 | -2.83901 | 0.004525 | 0.044939 | Adss     | DOWN |
| 220.1279 | -4.43824 | 1.563221 | -2.83916 | 0.004523 | 0.044939 | Susd4    | DOWN |
| 22.30583 | 2.099213 | 0.739831 | 2.837423 | 0.004548 | 0.045135 | Olf1r714 | UP   |
| 1577.566 | 6.182946 | 2.179457 | 2.83692  | 0.004555 | 0.045177 | Phka2    | UP   |
| 1916.345 | 5.850366 | 2.062422 | 2.836649 | 0.004559 | 0.045187 | Rsf1     | UP   |
| 342.3369 | 4.928756 | 1.737754 | 2.83628  | 0.004564 | 0.045211 | Ptms     | UP   |
| 96.33461 | -3.32029 | 1.170781 | -2.83596 | 0.004569 | 0.045223 | B3galnt2 | DOWN |
| 70.31461 | -2.59395 | 0.914717 | -2.8358  | 0.004571 | 0.045223 | Cops7a   | DOWN |
| 1974.541 | 6.114732 | 2.156765 | 2.835141 | 0.004581 | 0.045258 | Col20a1  | UP   |
| 445.9208 | -5.48848 | 1.935818 | -2.83522 | 0.004579 | 0.045258 | Cyb5a    | DOWN |
| 646.6612 | -5.63248 | 1.98805  | -2.83317 | 0.004609 | 0.045482 | Cdca4    | DOWN |
| 596.5599 | 4.995815 | 1.763278 | 2.833255 | 0.004608 | 0.045482 | Cdh2     | UP   |
| 1121.299 | -6.09927 | 2.153811 | -2.83185 | 0.004628 | 0.045614 | Ehd3     | DOWN |
| 13.47085 | -3.29352 | 1.163035 | -2.83183 | 0.004628 | 0.045614 | Mtfr2    | DOWN |
| 2487.499 | 6.219834 | 2.196656 | 2.831501 | 0.004633 | 0.045633 | Glyr1    | UP   |
| 124.1646 | -3.79597 | 1.340837 | -2.83104 | 0.00464  | 0.04567  | Ppplcc   | DOWN |
| 238.2886 | 4.417502 | 1.56128  | 2.829411 | 0.004663 | 0.045875 | Ddx20    | UP   |
| 89.45688 | -3.4045  | 1.203512 | -2.8288  | 0.004672 | 0.045903 | Nbn      | DOWN |
| 1241.827 | 5.084009 | 1.797347 | 2.828618 | 0.004675 | 0.045903 | Ppip5k2  | UP   |
| 393.4689 | 4.688811 | 1.657608 | 2.828661 | 0.004674 | 0.045903 | Scaf8    | UP   |
| 15.6187  | 2.801367 | 0.990881 | 2.827149 | 0.004696 | 0.046085 | Barh11   | UP   |
| 1371.047 | 6.237366 | 2.206733 | 2.826516 | 0.004706 | 0.046129 | BC024978 | UP   |
| 567.2643 | 5.772509 | 2.04232  | 2.826447 | 0.004707 | 0.046129 | Sparcl1  | UP   |
| 545.3958 | 5.392121 | 1.908494 | 2.825327 | 0.004723 | 0.046168 | Dipk2a   | UP   |
| 570.2351 | 5.846791 | 2.069071 | 2.825805 | 0.004716 | 0.046168 | Itpripl1 | UP   |
| 909.0869 | -6.15773 | 2.179512 | -2.82528 | 0.004724 | 0.046168 | Polr1b   | DOWN |
| 984.3406 | -5.79602 | 2.051561 | -2.82518 | 0.004725 | 0.046168 | Smrcb1   | DOWN |
| 478.2541 | -4.92716 | 1.743953 | -2.82528 | 0.004724 | 0.046168 | Stmn1    | DOWN |
| 588.3334 | -5.13692 | 1.818425 | -2.82493 | 0.004729 | 0.046175 | Orc4     | DOWN |
| 887.7878 | 5.443299 | 1.927162 | 2.824515 | 0.004735 | 0.046206 | Ptn      | UP   |
| 480.1448 | -5.27372 | 1.867505 | -2.82394 | 0.004744 | 0.046233 | Ints11   | DOWN |
| 14682.01 | -5.36251 | 1.898957 | -2.82393 | 0.004744 | 0.046233 | Ndufs6   | DOWN |
| 15.09841 | -2.703   | 0.957509 | -2.82295 | 0.004758 | 0.046345 | Tmem229b | DOWN |
| 601.3937 | -5.62801 | 1.993859 | -2.82267 | 0.004763 | 0.046357 | Blvrb    | DOWN |

|          |          |          |          |          |          |               |      |
|----------|----------|----------|----------|----------|----------|---------------|------|
| 52.5248  | -2.1931  | 0.777049 | -2.82234 | 0.004767 | 0.046377 | Sec23a        | DOWN |
| 50.83265 | -2.38464 | 0.845097 | -2.82173 | 0.004776 | 0.046435 | Pdcd21        | DOWN |
| 250.91   | 4.195627 | 1.487001 | 2.821536 | 0.004779 | 0.046435 | Slc5a3        | UP   |
| 1003.25  | -5.84113 | 2.071494 | -2.81977 | 0.004806 | 0.046635 | Map3k20       | DOWN |
| 1378.111 | 6.19247  | 2.195994 | 2.819893 | 0.004804 | 0.046635 | Msn           | UP   |
| 641.8682 | -5.90531 | 2.095312 | -2.81834 | 0.004827 | 0.046813 | Rida          | DOWN |
| 352.8496 | 4.37036  | 1.551186 | 2.817432 | 0.004841 | 0.046888 | Kdm6a         | UP   |
| 546.1563 | 5.65652  | 2.007569 | 2.817597 | 0.004838 | 0.046888 | Piga          | UP   |
| 171.6463 | 4.013594 | 1.425335 | 2.815895 | 0.004864 | 0.047055 | Fgd1          | UP   |
| 171.1436 | -4.35822 | 1.547695 | -2.81595 | 0.004863 | 0.047055 | Ruvb11        | DOWN |
| 110.017  | 3.611257 | 1.282613 | 2.815547 | 0.004869 | 0.047077 | Lcp1          | UP   |
| 1237.064 | -5.8502  | 2.078644 | -2.81443 | 0.004886 | 0.047212 | Csnk2b        | DOWN |
| 1788.186 | -6.03883 | 2.146065 | -2.81391 | 0.004894 | 0.04726  | Ccdc88c       | DOWN |
| 4225.923 | -5.81221 | 2.066018 | -2.81324 | 0.004904 | 0.047329 | Ahctf1        | DOWN |
| 869.5914 | -5.80844 | 2.065011 | -2.81279 | 0.004911 | 0.047366 | Gimp          | DOWN |
| 359.8094 | -5.38964 | 1.917409 | -2.8109  | 0.00494  | 0.047579 | Arc           | DOWN |
| 62.35402 | 2.752298 | 0.979202 | 2.810758 | 0.004943 | 0.047579 | Ythdf3        | UP   |
| 68.47326 | 2.279682 | 0.810957 | 2.811102 | 0.004937 | 0.047579 | Zfp827        | UP   |
| 1392.904 | 6.027182 | 2.144792 | 2.810147 | 0.004952 | 0.04764  | Xist          | UP   |
| 1061.917 | 6.187211 | 2.20192  | 2.809916 | 0.004955 | 0.047645 | Rexo2         | UP   |
| 4079.612 | 4.835571 | 1.721083 | 2.809609 | 0.00496  | 0.047661 | Pafah1b1      | UP   |
| 358.8253 | -5.176   | 1.842699 | -2.80892 | 0.004971 | 0.047711 | Mettl5        | DOWN |
| 2486.625 | 6.108899 | 2.174852 | 2.808881 | 0.004971 | 0.047711 | Setd2         | UP   |
| 53.18757 | 2.218196 | 0.789806 | 2.808533 | 0.004977 | 0.047733 | Lsm14b        | UP   |
| 1466.924 | -5.94786 | 2.118056 | -2.80817 | 0.004982 | 0.047748 | Ctnna1        | DOWN |
| 1464.037 | 6.012925 | 2.141322 | 2.808043 | 0.004984 | 0.047748 | Hl1f          | UP   |
| 74.98336 | 2.65399  | 0.945396 | 2.807279 | 0.004996 | 0.047822 | Hif1an        | UP   |
| 1407.847 | -5.92588 | 2.110994 | -2.80715 | 0.004998 | 0.047822 | Med23         | DOWN |
| 3257.277 | 5.725956 | 2.040407 | 2.806281 | 0.005012 | 0.047922 | Ankrd17       | UP   |
| 63.9074  | -2.4194  | 0.862204 | -2.80607 | 0.005015 | 0.047925 | Casp9         | DOWN |
| 307.1968 | 4.85261  | 1.729896 | 2.805145 | 0.005029 | 0.048033 | Gab3          | UP   |
| 549.6386 | 5.592916 | 1.994286 | 2.804471 | 0.00504  | 0.048104 | Inpp5a        | UP   |
| 1249.254 | 6.128357 | 2.185395 | 2.804233 | 0.005044 | 0.048105 | Fdft1         | UP   |
| 363.7554 | 5.957724 | 2.124669 | 2.804071 | 0.005046 | 0.048105 | Ldhd-ps       | UP   |
| 3078.101 | 6.030121 | 2.15134  | 2.802961 | 0.005064 | 0.048219 | Rars          | UP   |
| 1296.598 | 6.105947 | 2.178421 | 2.802923 | 0.005064 | 0.048219 | Zbtb11        | UP   |
| 22.71049 | -2.27411 | 0.81181  | -2.80129 | 0.00509  | 0.048434 | 2410004B18Rik | DOWN |
| 510.846  | 5.081585 | 1.814569 | 2.800436 | 0.005103 | 0.048533 | Strn3         | UP   |
| 258.2935 | 4.514664 | 1.612256 | 2.800215 | 0.005107 | 0.048537 | Fam129a       | UP   |
| 2178.29  | -6.32724 | 2.259775 | -2.79994 | 0.005111 | 0.048548 | Timm10        | DOWN |
| 104.7776 | 3.201727 | 1.143594 | 2.799705 | 0.005115 | 0.048555 | Snx19         | UP   |
| 316.8517 | 5.266736 | 1.881308 | 2.799508 | 0.005118 | 0.048555 | Rsb1          | UP   |
| 13.29501 | 2.874822 | 1.0271   | 2.798971 | 0.005127 | 0.048607 | Gm44017       | UP   |
| 1575.646 | 5.036243 | 1.800142 | 2.797692 | 0.005147 | 0.04877  | Txndc17       | UP   |
| 1144.174 | 6.007165 | 2.148312 | 2.796226 | 0.00517  | 0.048941 | 1810013L24Rik | UP   |
| 216.8051 | 4.21082  | 1.505924 | 2.796171 | 0.005171 | 0.048941 | Lrrc28        | UP   |
| 212.5772 | 4.085504 | 1.461978 | 2.794504 | 0.005198 | 0.049165 | Khdc4         | UP   |
| 1402.285 | 5.767401 | 2.064227 | 2.793976 | 0.005206 | 0.049187 | Echs1         | UP   |
| 482.1191 | 5.468451 | 1.957236 | 2.793966 | 0.005207 | 0.049187 | Mepce         | UP   |
| 1163.651 | -5.86265 | 2.098848 | -2.79327 | 0.005218 | 0.049264 | Kmt2e         | DOWN |
| 1470.718 | 5.823647 | 2.085382 | 2.792605 | 0.005229 | 0.049335 | Emsy          | UP   |
| 319.2995 | 4.997289 | 1.79039  | 2.791174 | 0.005252 | 0.049481 | Arpc3         | UP   |
| 283.0294 | -3.85383 | 1.38064  | -2.79134 | 0.005249 | 0.049481 | Clk1          | DOWN |
| 1006.453 | -6.01838 | 2.156297 | -2.79107 | 0.005253 | 0.049481 | Gdf11         | DOWN |

|          |          |          |          |          |          |           |      |
|----------|----------|----------|----------|----------|----------|-----------|------|
| 59.36217 | 2.433537 | 0.871987 | 2.790795 | 0.005258 | 0.049493 | Slc12a4   | UP   |
| 225.4423 | -4.62048 | 1.656442 | -2.7894  | 0.005281 | 0.049528 | Cyp20a1   | DOWN |
| 2052.566 | 5.96378  | 2.137854 | 2.78961  | 0.005277 | 0.049528 | Ewsr1     | UP   |
| 14.60468 | 2.628807 | 0.942217 | 2.790024 | 0.00527  | 0.049528 | Gm50268   | UP   |
| 153.6136 | 3.693929 | 1.324361 | 2.789217 | 0.005284 | 0.049528 | Pdk1      | UP   |
| 1536.83  | -5.94041 | 2.129095 | -2.79011 | 0.005269 | 0.049528 | Tars2     | DOWN |
| 434.48   | -5.60203 | 2.008376 | -2.78933 | 0.005282 | 0.049528 | Tax1bp3   | DOWN |
| 1284.112 | 5.668418 | 2.0321   | 2.789438 | 0.00528  | 0.049528 | Tsc22d2   | UP   |
| 232.1771 | -4.60573 | 1.651554 | -2.78872 | 0.005292 | 0.049573 | Lamtor2   | DOWN |
| 13.39976 | -3.01777 | 1.082251 | -2.78842 | 0.005297 | 0.049591 | Gm45407   | DOWN |
| 22.02956 | -2.12145 | 0.761008 | -2.78769 | 0.005309 | 0.049601 | Hmbs      | DOWN |
| 1695.233 | 6.090532 | 2.18488  | 2.787582 | 0.00531  | 0.049601 | Kdr       | UP   |
| 77.12432 | -3.02787 | 1.086095 | -2.78785 | 0.005306 | 0.049601 | Lancl2    | DOWN |
| 2309.343 | 5.827718 | 2.090429 | 2.78781  | 0.005307 | 0.049601 | Nbea      | UP   |
| 141.915  | 3.797584 | 1.36271  | 2.786787 | 0.005323 | 0.049605 | D2hgdh    | UP   |
| 492.4138 | 5.483488 | 1.967364 | 2.787226 | 0.005316 | 0.049605 | Fmnl2     | UP   |
| 377.3914 | 4.502908 | 1.61576  | 2.786867 | 0.005322 | 0.049605 | Kidins220 | UP   |
| 33.15406 | 1.970349 | 0.706993 | 2.786945 | 0.005321 | 0.049605 | Lats1     | UP   |
| 189.2801 | 4.28302  | 1.537142 | 2.786352 | 0.00533  | 0.049612 | Ccdc102a  | UP   |
| 933.7497 | 5.657463 | 2.030366 | 2.786425 | 0.005329 | 0.049612 | Sltm      | UP   |
| 2007.884 | 6.083152 | 2.183427 | 2.786057 | 0.005335 | 0.049624 | Dusp9     | UP   |
| 55.8658  | 2.654576 | 0.952864 | 2.785893 | 0.005338 | 0.049624 | Nostrin   | UP   |
| 1212.89  | 5.971751 | 2.144304 | 2.784937 | 0.005354 | 0.049696 | Dip2c     | UP   |
| 840.0886 | 5.736521 | 2.059903 | 2.78485  | 0.005355 | 0.049696 | Irs1      | UP   |
| 174.1777 | 3.842562 | 1.379661 | 2.785149 | 0.00535  | 0.049696 | Reep3     | UP   |
| 422.4582 | -5.27104 | 1.893101 | -2.78434 | 0.005364 | 0.049739 | Sec11a    | DOWN |
| 99.92843 | -3.31825 | 1.191821 | -2.78418 | 0.005366 | 0.049739 | Tspyl1    | DOWN |
| 293.4002 | 4.935338 | 1.772813 | 2.783902 | 0.005371 | 0.049753 | Ss1811    | UP   |
| 117.7972 | 3.949731 | 1.419059 | 2.783345 | 0.00538  | 0.049809 | Cwc27     | UP   |
| 376.2928 | -5.13561 | 1.845533 | -2.78272 | 0.00539  | 0.04987  | Mfap2     | DOWN |
| 468.4452 | 5.186337 | 1.863866 | 2.782569 | 0.005393 | 0.04987  | Slc35g1   | UP   |
| 1066.137 | 5.776426 | 2.076662 | 2.781592 | 0.005409 | 0.04998  | Ddx6      | UP   |
| 288.5557 | 4.779155 | 1.718286 | 2.78135  | 0.005413 | 0.04998  | Sdcbp     | UP   |
| 20.00232 | -2.6134  | 0.939703 | -2.78109 | 0.005418 | 0.04998  | Zfp866    | DOWN |
| 899.9979 | 5.965969 | 2.145125 | 2.781176 | 0.005416 | 0.04998  | Zfp871    | UP   |

**Table S2**

Methylation levels of genomic elements in ND and HFD fetal oocytes (E13.5)

| Elements       | ND   |        | HFD   |        | P value     |
|----------------|------|--------|-------|--------|-------------|
|                | Mean | Median | Mean  | Median |             |
| Promoter       | 3.97 | 1.72   | 6.26  | 2.58   | 9.65E-248   |
| 3'UTR          | 6.35 | 4.47   | 10.62 | 9.5    | 0           |
| 5'UTR          | 2.69 | 0      | 4.24  | 0.29   | 2.48E-91    |
| Exon           | 5.84 | 1.25   | 9.75  | 5      | 0           |
| Intron         | 7.2  | 6.32   | 12.15 | 11.81  | 0           |
| CGI            | 1.84 | 0.99   | 2.15  | 0.96   | 0.046346128 |
| CGI shore      | 4.62 | 3.63   | 7.31  | 6.25   | 0           |
| LINE           | 5.33 | 0      | 8.59  | 0      | 0           |
| SINE           | 4.32 | 0      | 7.37  | 0      | 0           |
| LTR            | 5.82 | 0      | 8.82  | 0      | 0           |
| DNA            | 4.1  | 0      | 7.08  | 0      | 0           |
| Low complexity | 0.42 | 0      | 0.63  | 0      | 5.06E-57    |
| Satellite      | 2.21 | 0      | 3.5   | 0      | 9.01E-60    |
| Simple repeat  | 0.77 | 0      | 1.25  | 0      | 0           |

**Table S3**

Methylation levels of genomic elements in ND and HFD fetal oocytes (E18.5)

| Elements       | ND   |        | HFD  |        | P value     |
|----------------|------|--------|------|--------|-------------|
|                | Mean | Median | Mean | Median |             |
| Promoter       | 2.38 | 1.13   | 3.78 | 1.44   | 8.66E-138   |
| 3'UTR          | 3.43 | 1.29   | 6.1  | 2.9    | 7.15E-196   |
| 5'UTR          | 1.66 | 0      | 2.46 | 0      | 3.15E-05    |
| Exon           | 3.19 | 0      | 5.45 | 0      | 0           |
| Intron         | 3.95 | 2.86   | 7.04 | 5.42   | 0           |
| CGI            | 1.46 | 0.96   | 1.71 | 0.98   | 0.000101915 |
| CGI shore      | 2.66 | 1.9    | 4.45 | 3.16   | 0           |
| LINE           | 3.09 | 0      | 4.71 | 0      | 0           |
| SINE           | 2.33 | 0      | 3.82 | 0      | 0           |
| LTR            | 3.71 | 0      | 5.14 | 0      | 0           |
| DNA            | 2.13 | 0      | 3.51 | 0      | 7.78E-182   |
| Low complexity | 0.27 | 0      | 0.35 | 0      | 0.566769174 |
| Satellite      | 1.21 | 0      | 1.92 | 0      | 1.17E-25    |
| Simple repeat  | 0.44 | 0      | 0.65 | 0      | 6.49E-134   |



**Table S4****Identified 2449 hyper-DMRs between ND and HFD fetal oocyte at E13.5.**

| dmr_chrom | dmr_start | dmr_end   | qval      | diff      | cpgs | mean_ND | mean_HFD | genes_name                                                            |
|-----------|-----------|-----------|-----------|-----------|------|---------|----------|-----------------------------------------------------------------------|
| chr8      | 83923164  | 83923526  | 1.3488e-0 | -35.56563 | 19   | 2.4027  | 37.968   | Adgrl1                                                                |
| chr14     | 52006790  | 52007004  | 1.35E-06  | -26.1044  | 28   | 2.0536  | 28.158   | Zfp219                                                                |
| chr12     | 107916703 | 107916929 | 1.3488e-0 | -21.29121 | 32   | 2.3611  | 23.652   | Bcl11b                                                                |
| chr15     | 76889779  | 76890331  | 1.3488e-0 | -19.91505 | 32   | 1.224   | 21.139   | Zfp7 & Gm49527                                                        |
| chr4      | 133860134 | 133860239 | 2.6719e-0 | -52.76909 | 16   | 1.5625  | 54.332   | Rps6ka1                                                               |
| chr15     | 98456535  | 98456726  | 2.6719e-0 | -23.66086 | 24   | 0.86806 | 24.529   | Olfr281                                                               |
| chr14     | 60691187  | 60691659  | 3.88E-06  | -26.6861  | 44   | 5.5677  | 32.254   | Spata13                                                               |
|           |           |           |           |           |      |         |          | Gm44973 & zinc finger protein 865 & coiled-coil domain containing 106 |
| chr7      | 5029668   | 5029973   | 6.1054e-0 | -20.88292 | 33   | 3.1692  | 24.052   |                                                                       |
| chr6      | 48064244  | 48064499  | 6.1329e-0 | -39.86037 | 27   | 1.1111  | 40.971   | Zfp746                                                                |
| chr4      | 141475312 | 141475457 | 8.8077e-0 | -38.53165 | 18   | 0.39683 | 38.928   | Spn                                                                   |
| chr17     | 31844782  | 31845127  | 8.8077e-0 | -32.68518 | 27   | 2.4868  | 35.172   | Sik1                                                                  |
| chr17     | 56434447  | 56434582  | 8.8077e-0 | -30.75906 | 17   | 0.91036 | 31.669   | Ptprs                                                                 |
| chr7      | 43938329  | 43938453  | 8.8077e-0 | -27.11425 | 21   | 0.29762 | 27.412   | Klk15 & Gm44756                                                       |
| chr1      | 36408477  | 36408881  | 8.8077e-0 | -16.25843 | 40   | 3.5193  | 19.778   | Fer1l5                                                                |
| chr5      | 123029317 | 123029606 | 1.1113e-0 | -34.05919 | 24   | 0.82672 | 34.886   | Orai1                                                                 |
| chr8      | 120568290 | 120568559 | 1.1113e-0 | -24.25754 | 24   | 1.4955  | 25.753   | Gse1 & Gm20388                                                        |
| chr7      | 25342514  | 25342600  | 2.024e-05 | -48.21428 | 14   | 0.89286 | 49.107   | Megf8                                                                 |
| chr3      | 89379776  | 89380099  | 2.024e-05 | -21.39624 | 23   | 0.85404 | 22.25    | Zbtb7b                                                                |
| chr4      | 1.52E+08  | 1.52E+08  | 2.16E-05  | -50.7579  | 15   | 1.9444  | 52.702   | Dnajc11                                                               |
| chr15     | 98597366  | 98597872  | 2.161e-05 | -38.96275 | 21   | 2.0238  | 40.987   | Adcy6                                                                 |
| chr14     | 70139219  | 70139361  | 2.161e-05 | -37.80228 | 17   | 0.78782 | 38.59    | Ccar2                                                                 |
| chr7      | 45232209  | 45232693  | 2.161e-05 | -35.74404 | 16   | 1.1458  | 36.89    | Tead2                                                                 |
| chr7      | 144791226 | 144792166 | 2.161e-05 | -33.31517 | 44   | 13.651  | 46.966   | Gm34964 & Gm9711                                                      |
| chr11     | 1.01E+08  | 1.01E+08  | 2.16E-05  | -22.7737  | 16   | 0.5208  | 23.295   | Zfp385c                                                               |
| chr7      | 1.28E+08  | 1.28E+08  | 2.29E-05  | -39.0789  | 19   | 1.3158  | 40.395   | Cox6a2 & Itgad                                                        |
| chr8      | 85044161  | 85045109  | 2.309e-05 | -33.22971 | 27   | 2.3148  | 35.545   | Tnpo2                                                                 |
| chr2      | 92953424  | 92953744  | 2.4695e-0 | -28.61552 | 27   | 0.37037 | 28.986   | Syt13                                                                 |
| chr13     | 55156186  | 55156467  | 2.4695e-0 | -21.75946 | 29   | 1.7241  | 23.484   | Fgfr4                                                                 |
| chr10     | 79733803  | 79734333  | 2.6547e-0 | -27.59653 | 34   | 7.3023  | 34.899   | Hcn2                                                                  |
| chr18     | 84209396  | 84209946  | 2.6547e-0 | -19.17568 | 38   | 1.7701  | 20.946   | Zfp407                                                                |
| chr7      | 127811104 | 127811395 | 2.7338e-0 | -11.58996 | 24   | 0.17361 | 11.764   | Stx1b                                                                 |
| chr19     | 55908376  | 55908524  | 2.9311e-0 | -60.06746 | 15   | 1.7262  | 61.794   | Tcf7l2                                                                |
| chr15     | 75980948  | 75981164  | 3.981e-05 | -21.46141 | 29   | 3.7541  | 25.216   | Ccdc166                                                               |
| chr5      | 140759877 | 140760156 | 4.2225e-0 | -28.33512 | 23   | 1.1775  | 29.513   | Amz1 & Gna12                                                          |
| chr11     | 1.12E+08  | 1.12E+08  | 4.76E-05  | -62.7244  | 13   | 16.122  | 78.846   |                                                                       |
| chr19     | 29116403  | 29117353  | 4.9849e-0 | -31.43140 | 21   | 1.5873  | 33.019   | Rcl1                                                                  |
| chr10     | 44058350  | 44058713  | 5.13E-05  | -38.7698  | 27   | 0.6173  | 39.387   | Crybg1                                                                |
| chr10     | 81498773  | 81498997  | 5.22E-05  | -43.1889  | 16   | 1.0417  | 44.231   | S1pr4                                                                 |
| chr17     | 6492743   | 6492796   | 5.22E-05  | -40.0484  | 16   | 0.8371  | 40.885   | Gm26848                                                               |
| chr12     | 81690106  | 81690364  | 5.22E-05  | -34.2183  | 20   | 3.75    | 37.968   |                                                                       |
| chr17     | 56069209  | 56069389  | 5.2157e-0 | -32.33543 | 17   | 2.6961  | 35.032   | Ubxn6 & Chaf1a                                                        |
| chr8      | 108949279 | 108949769 | 5.2157e-0 | -28.96176 | 30   | 5.8333  | 34.795   | Zfhx3                                                                 |
| chr7      | 19388197  | 19388383  | 5.2157e-0 | -27.11863 | 15   | 4.5029  | 31.622   | Ercc2 & Gm26852                                                       |
| chr9      | 119974073 | 119974302 | 5.2157e-0 | -25.95463 | 24   | 2.5647  | 28.519   | Csrnp1 & Cx3cr1                                                       |
| chr1      | 91308762  | 91309144  | 5.2157e-0 | -23.21387 | 31   | 0.40963 | 23.624   | Scly & Gm17090                                                        |
| chr4      | 43538167  | 43538283  | 5.22E-05  | -23.2     | 18   | 1.8519  | 25.052   | Tln1                                                                  |
| chr15     | 79620760  | 79621028  | 5.22E-05  | -22.6518  | 20   | 0.8333  | 23.485   | Fam227a                                                               |
| chr15     | 76435805  | 76436420  | 5.2157e-0 | -22.09181 | 27   | 3.6075  | 25.699   | Mroh1                                                                 |

|       |           |           |           |           |    |         |        |                          |
|-------|-----------|-----------|-----------|-----------|----|---------|--------|--------------------------|
| chr17 | 56894968  | 56895139  | 5.2157e-0 | -22.04280 | 17 | 1.0084  | 23.051 | Mllt1                    |
| chr11 | 70725905  | 70726325  | 5.2157e-0 | -18.80120 | 36 | 4.8457  | 23.647 | Kif1c                    |
| chr7  | 1.45E+08  | 1.45E+08  | 5.68E-05  | -31.4162  | 30 | 3.869   | 35.285 | Fgf3                     |
| chr5  | 134522864 | 134523086 | 7.8409e-0 | -17.54951 | 29 | 4.2352  | 21.785 | Clip2                    |
| chr19 | 25410071  | 25410184  | 8.4179e-0 | -37.75344 | 15 | 0.30303 | 38.056 | Kank1                    |
| chr9  | 75388828  | 75389141  | 8.4469e-0 | -35.54533 | 23 | 5.1449  | 40.69  | Mapk6                    |
| chr9  | 53884029  | 53884139  | 9.3075e-0 | -20.20661 | 22 | 0.89286 | 21.099 | Gm16380                  |
| chr4  | 1.34E+08  | 1.34E+08  | 9.59E-05  | -30.3262  | 17 | 1.9608  | 32.287 | Crybg2                   |
| chr8  | 45794962  | 45795178  | 9.6478e-0 | -33.60644 | 17 | 1.1555  | 34.762 | Sorbs2 &<br>Sorbs2os     |
| chr6  | 1.4E+08   | 1.4E+08   | 9.65E-05  | -32.7418  | 16 | 0.625   | 33.367 | Plekha5                  |
| chr2  | 1.63E+08  | 1.63E+08  | 0.000104  | -26.8795  | 22 | 0.9091  | 27.789 | Tox2                     |
| chr3  | 1.47E+08  | 1.47E+08  | 0.000112  | -25.3671  | 12 | 0.8333  | 26.2   | Ttll7                    |
| chr19 | 42263199  | 42263305  | 0.000119  | -53.3482  | 12 | 2.0833  | 55.432 | Golga7b                  |
| chr1  | 162544609 | 162544754 | 0.0001189 | -43.75000 | 12 | 1.3889  | 45.139 | Mettl13                  |
| chr4  | 56740548  | 56740769  | 0.0001189 | -30.98415 | 24 | 7.9861  | 38.97  | Actl7b &<br>Gm26657      |
| chr15 | 78820730  | 78820836  | 0.00013   | -21.9782  | 30 | 0.5159  | 22.494 | Gm7318                   |
| chr2  | 27859799  | 27860175  | 0.00013   | -19.881   | 14 | 1.25    | 21.131 |                          |
| chr4  | 43422069  | 43422254  | 0.0001308 | -41.99175 | 13 | 1.25    | 43.242 | Rusc2                    |
| chr4  | 137546355 | 137546669 | 0.0001308 | -38.57586 | 13 | 2.5991  | 41.175 | Hspg2                    |
| chr19 | 5685902   | 5686024   | 0.0001347 | -31.33394 | 13 | 0.42735 | 31.761 | Pcnx3                    |
| chr8  | 70650570  | 70650718  | 0.0001347 | -21.86612 | 19 | 1.3158  | 23.182 | Pgpep1                   |
| chr1  | 13113635  | 13114462  | 0.000136  | -22.8801  | 19 | 4.8246  | 27.705 | Prdm14                   |
| chr1  | 1.34E+08  | 1.34E+08  | 0.000143  | -51.1054  | 14 | 1.1905  | 52.296 | Fmod                     |
| chr12 | 81937072  | 81937727  | 0.0001430 | -43.57936 | 15 | 0.47619 | 44.056 | Pcnx                     |
| chrX  | 1.65E+08  | 1.65E+08  | 0.000143  | -39.7098  | 16 | 3.2812  | 42.991 |                          |
| chr5  | 1.19E+08  | 1.19E+08  | 0.000143  | -35.501   | 17 | 0.7353  | 36.236 | Med13l                   |
| chr17 | 25859134  | 25859216  | 0.0001430 | -34.78836 | 18 | 1.9444  | 36.733 | Wdr90 &<br>Gm26694       |
| chrX  | 73794920  | 73795103  | 0.000143  | -25.9567  | 17 | 1.0989  | 27.056 | Pdzd4                    |
| chr5  | 124214778 | 124214929 | 0.0001430 | -21.32812 | 16 | 1.0417  | 22.37  | Pitpnm2                  |
| chr13 | 52967605  | 52968036  | 0.0001430 | -17.22011 | 18 | 0.46296 | 17.683 | Nfil3                    |
| chr13 | 1.13E+08  | 1.13E+08  | 0.000143  | -17.2044  | 29 | 0.2155  | 17.42  | Ddx4                     |
| chr14 | 60040129  | 60040423  | 0.000145  | -32.1212  | 22 | 10.72   | 42.841 | Gm9013 & Atp8a2          |
| chr7  | 144500283 | 144500374 | 0.0001456 | -59.32291 | 16 | 4.4271  | 63.75  | Ppfia1                   |
| chr2  | 165893015 | 165893598 | 0.0001456 | -29.36233 | 16 | 2.0833  | 31.446 | Zmynd8                   |
| chr7  | 25046229  | 25046359  | 0.0001533 | -32.02381 | 24 | 3.8947  | 35.918 | Grik5                    |
| chr8  | 71584254  | 71584422  | 0.0001533 | -20.17068 | 32 | 4.5752  | 24.746 | Slc27a1                  |
| chr15 | 86086587  | 86086974  | 0.0001533 | -19.04017 | 24 | 4.3601  | 23.4   | Gramd4                   |
| chr11 | 106017416 | 106017846 | 0.0001573 | -20.04157 | 32 | 3.6272  | 23.669 | Kcnh6                    |
| chr7  | 105480384 | 105481197 | 0.0001595 | -22.01078 | 32 | 3.3817  | 25.392 | Cavin3                   |
| chr13 | 54996164  | 54996506  | 0.0001679 | -22.10427 | 28 | 2.381   | 24.485 | Unc5a                    |
| chr7  | 131183620 | 131183948 | 0.0001862 | -36.83035 | 12 | 0.52083 | 37.351 | 5430419D17Rik &<br>Fgfr2 |
| chr17 | 56427377  | 56427584  | 0.0002186 | -59.22222 | 15 | 0.55556 | 59.778 | Ptpns                    |
| chr17 | 25377550  | 25377668  | 0.000228  | -32.5649  | 22 | 3.6364  | 36.201 | Cacna1h                  |
| chr7  | 29529075  | 29529351  | 0.0002280 | -29.84349 | 13 | 0.48077 | 30.324 | 4932431P20Rik            |
| chr10 | 80000900  | 80001139  | 0.0002318 | -42.71214 | 13 | 1.9231  | 44.635 | Abca7                    |
| chr2  | 167128158 | 167128476 | 0.0002318 | -30.59805 | 13 | 0.27473 | 30.873 | Kcnb1                    |
| chr2  | 31893857  | 31893882  | 0.0002407 | -38.27381 | 10 | 7       | 45.274 | Lamc3                    |
| chr13 | 34746792  | 34746867  | 0.0002407 | -28.54166 | 10 | 0.35714 | 28.899 | Fam50b                   |
| chr4  | 1.31E+08  | 1.31E+08  | 0.000241  | -38.4734  | 14 | 6.5564  | 45.03  |                          |
| chr7  | 126373960 | 126374048 | 0.0002409 | -33.32539 | 15 | 7.619   | 40.944 | Spns1                    |
| chr1  | 36103925  | 36103988  | 0.000241  | -28.5714  | 10 | 3.5714  | 32.143 | Hs6st1                   |
| chr4  | 118541902 | 118542058 | 0.0002439 | -28.17163 | 26 | 7.5345  | 35.706 | Tmem125                  |
| chr16 | 32679789  | 32679873  | 0.0002468 | -33.68254 | 15 | 6.2222  | 39.905 | Tnk2                     |
| chr15 | 76174792  | 76174945  | 0.0002488 | -27.69001 | 26 | 4.7024  | 32.392 | Plec                     |

|       |           |           |           |           |    |         |        |                                                         |
|-------|-----------|-----------|-----------|-----------|----|---------|--------|---------------------------------------------------------|
| chr10 | 81077975  | 81078516  | 0.000251  | -19.6562  | 26 | 5.69    | 25.346 | Thop1                                                   |
| chr8  | 122269164 | 122269301 | 0.0002514 | -17.92852 | 21 | 0.34014 | 18.269 | Gm20388                                                 |
| chr10 | 120093527 | 120094063 | 0.0002797 | -24.08088 | 25 | 4.4913  | 28.572 | Helb                                                    |
| chr2  | 1.37E+08  | 1.37E+08  | 0.000295  | -25.9853  | 20 | 6.1012  | 32.086 | Jag1                                                    |
| chr4  | 56740241  | 56740523  | 0.0002956 | -21.85793 | 25 | 3.127   | 24.985 | Actl7b &<br>Gm26657                                     |
| chr19 | 53009756  | 53010275  | 0.0003387 | -26.87457 | 19 | 0.87719 | 27.752 | Xpnpep1                                                 |
| chr18 | 24958885  | 24959308  | 0.0003469 | -56.75595 | 12 | 2.0833  | 58.839 | Fhod3                                                   |
| chr14 | 118597724 | 118597894 | 0.0003507 | -26.13562 | 17 | 6.8371  | 32.973 | Abcc4                                                   |
| chr11 | 116599251 | 116599427 | 0.0003507 | -24.63564 | 22 | 0.5772  | 25.213 | Rhbdf2                                                  |
| chr7  | 29008448  | 29009261  | 0.0003507 | -22.99759 | 22 | 4.1288  | 27.126 | Ryr1                                                    |
| chr4  | 62498743  | 62498871  | 0.000351  | -19.2329  | 12 | 0.2604  | 19.493 |                                                         |
| chr15 | 98835052  | 98835354  | 0.0003507 | -14.33261 | 28 | 1.1905  | 15.523 | Kmt2d                                                   |
| chr9  | 67092699  | 67092731  | 0.000352  | -51.2897  | 12 | 0.6944  | 51.984 |                                                         |
| chr8  | 119951949 | 119952066 | 0.0003590 | -36.75925 | 18 | 0.79365 | 37.553 | Usp10 &                                                 |
| chr16 | 4370323   | 4370507   | 0.0003618 | -31.79157 | 12 | 2.0833  | 33.875 | Adcy9                                                   |
| chr15 | 80235812  | 80235943  | 0.0003618 | -52.36111 | 12 | 2.0833  | 54.444 | AC140267.1 &<br>mitochondrial<br>elongation factor<br>1 |
| chr7  | 128242504 | 128242546 | 0.0003618 | -45.19292 | 12 | 3.266   | 48.459 | Armc5                                                   |
| chr11 | 61313496  | 61313770  | 0.0003618 | -21.91876 | 17 | 2.1569  | 24.076 | Slc47a2                                                 |
| chr7  | 99425964  | 99426651  | 0.0003618 | -20.90580 | 28 | 1.9069  | 22.813 | Gdpd5                                                   |
| chr5  | 31059668  | 31059878  | 0.0003670 | -30.08870 | 17 | 0.98039 | 31.069 | Cad                                                     |
| chr15 | 98846705  | 98846861  | 0.000384  | -28.7957  | 17 | 0.7353  | 29.531 | Kmt2d                                                   |
| chr2  | 167106448 | 167106696 | 0.0003843 | -42.18750 | 16 | 1.5625  | 43.75  | Kcnb1                                                   |
| chr11 | 79027230  | 79027399  | 0.000384  | -39.2485  | 16 | 1.5625  | 40.811 | Gm11201 & Ksr1                                          |
| chr17 | 47391867  | 47391990  | 0.000384  | -32.6501  | 16 | 0.7813  | 33.431 | Guca1b                                                  |
| chr4  | 1.36E+08  | 1.36E+08  | 0.000384  | -29.0464  | 16 | 1.8229  | 30.869 |                                                         |
| chr15 | 1.01E+08  | 1.01E+08  | 0.000384  | -25.7626  | 16 | 4.6875  | 30.45  | Scn8a                                                   |
| chr1  | 56796839  | 56797037  | 3.84E-04  | -25.5105  | 15 | 1.6667  | 27.177 | Satb2                                                   |
| chr1  | 1.8E+08   | 1.8E+08   | 0.000384  | -25.4502  | 13 | 0.641   | 26.091 |                                                         |
| chr9  | 121909188 | 121909423 | 0.0003843 | -21.58482 | 16 | 2.567   | 24.152 | Ackr2                                                   |
| chr15 | 89457436  | 89457631  | 0.0003843 | -16.17497 | 23 | 1.5064  | 17.681 | Mapk8ip2                                                |
| chrX  | 52898664  | 52898773  | 0.0003843 | -11.11957 | 13 | 0.96154 | 12.081 | Rps2-ps13                                               |
| chr8  | 1.17E+08  | 1.17E+08  | 0.000386  | -40.4167  | 16 | 4.1146  | 44.531 |                                                         |
| chr17 | 25383462  | 25383616  | 0.000394  | -33.3056  | 15 | 1.75    | 35.056 | Cacna1h                                                 |
| chr13 | 1.01E+08  | 1.01E+08  | 0.000412  | -29.3513  | 23 | 1.8892  | 31.241 |                                                         |
| chr7  | 109727837 | 109728117 | 0.0004115 | -28.32913 | 20 | 2.1071  | 30.436 | Ascl3                                                   |
| chr11 | 51644281  | 51644486  | 0.0004115 | -21.01034 | 25 | 2.9841  | 23.994 | N4bp3                                                   |
| chr5  | 137571640 | 137571928 | 0.000418  | -25.53024 | 27 | 0.61728 | 26.148 | Tfr2                                                    |
| chr14 | 1.18E+08  | 1.18E+08  | 0.00042   | -36.8034  | 27 | 0.3704  | 37.174 |                                                         |
| chr13 | 48805817  | 48805897  | 0.0004303 | -44.79761 | 10 | 7.881   | 52.679 | Phf2                                                    |
| chr18 | 75521600  | 75521711  | 0.0004333 | -59.33333 | 10 | 1       | 60.333 | Gm10532 & Ctif                                          |
| chr6  | 1.36E+08  | 1.36E+08  | 0.000486  | -23.1313  | 22 | 2.2727  | 25.404 | Grin2b                                                  |
| chr19 | 4801604   | 4801748   | 0.000488  | -17.209   | 33 | 0.3788  | 17.588 | Rbm14 &<br>Gm21844 &<br>Gm21992                         |
| chr10 | 77041835  | 77042100  | 0.0005122 | -24.91206 | 28 | 3.8479  | 28.76  | Slc19a1                                                 |
| chr7  | 46059799  | 46060036  | 0.0005474 | -35.17306 | 18 | 2.3258  | 37.499 | Nomo1                                                   |
| chr3  | 89380429  | 89380914  | 0.0005748 | -31.19161 | 35 | 4.966   | 36.158 | Zbtb7b                                                  |
| chr10 | 3956728   | 3956995   | 0.0005748 | -23.89367 | 29 | 2.0567  | 25.95  | Plekhg1                                                 |
| chr14 | 72978515  | 72978841  | 0.0005755 | -29.61666 | 21 | 1.1905  | 30.807 | Gm9198                                                  |
| chr12 | 1.08E+08  | 1.08E+08  | 0.000591  | -19.7686  | 32 | 1.3542  | 21.123 | Ccdc85c                                                 |
| chr5  | 36204872  | 36205044  | 0.0006043 | -26.27855 | 12 | 0.34722 | 26.626 | Psap1 & Sorcs2                                          |
| chr11 | 54336949  | 54337274  | 0.0006043 | -17.07049 | 29 | 3.9819  | 21.052 | Acsf6                                                   |
| chr2  | 32685722  | 32685864  | 0.0006171 | -13.78235 | 16 | 1.25    | 15.032 | Fpgs                                                    |
| chr8  | 108557200 | 108557701 | 0.0006392 | -56.66666 | 12 | 0.69444 | 57.361 | Lncbate1 & Zfhx3                                        |

|       |           |           |           |           |    |         |        |                      |
|-------|-----------|-----------|-----------|-----------|----|---------|--------|----------------------|
| chr12 | 117184595 | 117184704 | 0.0006392 | -47.77777 | 15 | 4.4444  | 52.222 | Ptpn2                |
| chr2  | 153231511 | 153231828 | 0.0006392 | -41.84812 | 15 | 8.6219  | 50.47  | Plagl2               |
| chr8  | 124194593 | 124194873 | 0.0006392 | -36.85267 | 16 | 3.0506  | 39.903 | Gm20388              |
| chr2  | 158829442 | 158829582 | 0.0006449 | -42.84127 | 15 | 3.4444  | 46.286 | Dhx35                |
| chr7  | 16837900  | 16838216  | 0.0006673 | -38.38003 | 14 | 3.2738  | 41.654 | Strn4                |
| chr12 | 84650146  | 84650254  | 0.0006673 | -33.79220 | 15 | 3.1522  | 36.944 | Vrtn                 |
| chr1  | 131847175 | 131847589 | 0.0006673 | -32.61607 | 20 | 1.6667  | 34.283 | Slc41a1              |
| chr11 | 60480529  | 60480750  | 0.0006673 | -26.12049 | 15 | 1.6364  | 27.757 | Myo15                |
| chr7  | 141191394 | 141191967 | 0.0006673 | -25.87244 | 19 | 7.9323  | 33.805 | Hras                 |
| chr11 | 113562573 | 113562783 | 0.0006792 | -43.10515 | 14 | 1.7432  | 44.848 | Slc39a11             |
| chr8  | 70420819  | 70421588  | 0.0007136 | -28.52652 | 19 | 5.6798  | 34.206 | Crtc1                |
| chr6  | 124749607 | 124749984 | 0.0007258 | -30.49242 | 22 | 1.5152  | 32.008 | Gm45234 & atrophin 1 |
| chr7  | 118984026 | 118984209 | 0.0007258 | -24.45792 | 19 | 3.6614  | 28.119 | Gprc5b               |
| chr3  | 100472316 | 100472669 | 0.0007869 | -26.93922 | 19 | 0.65789 | 27.597 | Tent5c               |
| chr11 | 114226361 | 114226951 | 0.0007953 | -36.80555 | 24 | 0.52083 | 37.326 | Gm11690              |
| chr10 | 80569007  | 80569097  | 0.0007953 | -35.92857 | 25 | 6.0048  | 41.933 | Klf16                |
| chr11 | 70189607  | 70189731  | 0.000834  | -55.7222  | 10 | 1.25    | 56.972 |                      |
| chr4  | 1.36E+08  | 1.36E+08  | 0.000845  | -79.1667  | 10 | 5.1667  | 84.333 |                      |
| chr18 | 79112198  | 79112405  | 0.000845  | -64.5     | 10 | 1.6667  | 66.167 |                      |
| chr7  | 4146988   | 4147112   | 0.0008451 | -43.50000 | 10 | 0.83333 | 44.333 | Leng8                |
| chr11 | 101458450 | 101458697 | 0.0008451 | -40.76587 | 10 | 0.55556 | 41.321 | Ifi35                |
| chr2  | 1.68E+08  | 1.68E+08  | 0.000845  | -39.7619  | 10 | 1.6667  | 41.429 | Ripor3               |
| chrX  | 8938117   | 8938164   | 0.000845  | -38.9167  | 10 | 5       | 43.917 |                      |
| chr1  | 1.82E+08  | 1.82E+08  | 0.000845  | -28.9372  | 10 | 2.5     | 31.437 | Fbxo28               |
| chr1  | 83004535  | 83004735  | 0.000845  | -26.6638  | 21 | 2.3044  | 28.968 | Gm7553               |
| chr3  | 90300015  | 90300457  | 0.000845  | -24.1389  | 10 | 1       | 25.139 | Gatad2b              |
| chr4  | 1.35E+08  | 1.35E+08  | 0.000845  | -23.4458  | 18 | 1.1243  | 24.57  |                      |
| chr19 | 25409980  | 25410071  | 0.0008451 | -15.03014 | 18 | 1.2346  | 16.265 | Kank1                |
| chr13 | 38022582  | 38022811  | 0.0009240 | -37.52801 | 17 | 1.2745  | 38.803 | Cage1                |
| chr11 | 77471616  | 77471748  | 0.000952  | -33.5449  | 23 | 1.5942  | 35.139 | Ankrd13b             |
| chr4  | 47244518  | 47245480  | 0.0009524 | -25.11785 | 17 | 1.4706  | 26.588 | Col15a1              |
| chr19 | 46307057  | 46307915  | 0.0010179 | -30.82695 | 28 | 3.1193  | 33.946 | Nfkb2                |
| chr8  | 71290363  | 71290513  | 0.0010365 | -18.28249 | 16 | 2.2917  | 20.574 | Myo9b                |
| chr5  | 125483088 | 125483428 | 0.0010366 | -54.28210 | 15 | 3.3333  | 57.615 | Aacs                 |
| chr4  | 63416429  | 63416498  | 0.0010366 | -50.71759 | 12 | 0.46296 | 51.181 | Whrn                 |
| chr2  | 167992589 | 167992689 | 0.0010366 | -49.57864 | 15 | 4.4444  | 54.023 | Ripor3               |
| chr13 | 104036843 | 104036921 | 0.0010366 | -46.50000 | 15 | 1.6667  | 48.167 | Nln                  |
| chr7  | 126373600 | 126373917 | 0.0010366 | -44.25891 | 14 | 3.4524  | 47.711 | Spns1                |
| chr6  | 134953910 | 134954094 | 0.0010366 | -44.09722 | 12 | 2.0833  | 46.181 | Lockd                |
| chr17 | 27441897  | 27441992  | 0.001037  | -41.8394  | 12 | 3.7554  | 45.595 | Grm4                 |
| chr12 | 110618148 | 110618409 | 0.0010366 | -40.15692 | 22 | 1.8939  | 42.051 | Dync1h1              |
| chr2  | 92415922  | 92416266  | 0.0010366 | -40.04273 | 13 | 2.1795  | 42.222 | D930015M05Rik & Cry2 |
| chr2  | 25625331  | 25625878  | 0.0010366 | -39.09013 | 14 | 0.59524 | 39.685 | Fcna & Fcnaos        |
| chr7  | 36770411  | 36770571  | 0.0010366 | -37.95222 | 12 | 1.7113  | 39.664 | Tshz3                |
| chr4  | 1.49E+08  | 1.49E+08  | 0.001037  | -36.776   | 12 | 0.8333  | 37.609 | Mtor                 |
| chr17 | 30527548  | 30527736  | 0.0010366 | -35.72089 | 15 | 3.3333  | 39.054 | Btbd9                |
| chr13 | 51698589  | 51698787  | 0.0010366 | -35.55555 | 15 | 3.3333  | 38.889 | Sema4d               |
| chr7  | 132568424 | 132568566 | 0.0010366 | -34.72222 | 15 | 5.8333  | 40.556 | Oat & Fgfr2          |
| chr10 | 31248449  | 31248900  | 0.0010366 | -34.22348 | 22 | 4.5455  | 38.769 | Gm5422               |
| chr15 | 74447564  | 74447689  | 0.001037  | -33.4524  | 14 | 1.7857  | 35.238 |                      |
| chr5  | 1.16E+08  | 1.16E+08  | 0.001037  | -32.3462  | 12 | 1.0417  | 33.388 | Gcn111               |
| chr5  | 121372894 | 121373313 | 0.0010366 | -32.30459 | 15 | 1.2222  | 33.527 | Trafd1               |
| chr11 | 98764360  | 98764446  | 0.0010366 | -31.63946 | 12 | 0.83333 | 32.473 | Thra                 |
| chr17 | 23834689  | 23834857  | 0.0010366 | -30.97222 | 15 | 0.55556 | 31.528 | Prss33               |
| chr5  | 124114371 | 124114564 | 0.0010366 | -30.92261 | 16 | 2.0833  | 33.006 | Ogfod2               |
| chr15 | 78940486  | 78940594  | 0.0010366 | -30.83333 | 13 | 2.5641  | 33.397 | Nol12                |

|       |           |           |           |           |    |         |        |                   |
|-------|-----------|-----------|-----------|-----------|----|---------|--------|-------------------|
| chr18 | 66061411  | 66061624  | 0.0010366 | -30.36061 | 13 | 0.21368 | 30.574 | Ccbe1             |
| chr8  | 117078620 | 117079164 | 0.0010366 | -30.18849 | 12 | 2.0833  | 32.272 | Pkd1l2            |
| chr4  | 154152384 | 154152587 | 0.0010366 | -29.32720 | 14 | 1.7857  | 31.113 | Wrap73            |
| chr3  | 88368576  | 88369010  | 0.0010366 | -29.09139 | 12 | 2.0833  | 31.175 | Bglap3            |
| chr9  | 122166673 | 122166807 | 0.0010366 | -28.72288 | 15 | 0.37037 | 29.093 | Snrk              |
| chr4  | 43535806  | 43536043  | 0.0010366 | -28.62313 | 15 | 0.66667 | 29.29  | Tln1              |
| chr2  | 168148139 | 168148240 | 0.0010366 | -28.08035 | 16 | 1.0714  | 29.152 | Gm14235           |
| chr5  | 120963606 | 120964052 | 0.0010366 | -27.38802 | 15 | 2.9167  | 30.305 | Rph3a             |
| chr12 | 8790788   | 8791050   | 0.001037  | -27.0513  | 13 | 2.5641  | 29.615 | Sdc1              |
| chr12 | 112610650 | 112610914 | 0.0010366 | -26.75602 | 13 | 0.8547  | 27.611 | Inf2              |
| chr4  | 137548364 | 137548450 | 0.0010366 | -26.54331 | 13 | 2.1795  | 28.723 | Hspg2             |
| chr14 | 63746841  | 63747275  | 0.0010366 | -26.19047 | 14 | 0.39683 | 26.587 | Xkr6              |
| chr8  | 120475367 | 120475763 | 0.0010366 | -26.16496 | 14 | 0.89286 | 27.058 | Gse1 & Gm20388    |
| chr7  | 98064104  | 98064194  | 0.0010366 | -26.01615 | 14 | 7.6233  | 33.639 | Myo7a             |
| chr6  | 90413525  | 90413825  | 0.0010366 | -25.85497 | 15 | 0.55556 | 26.411 | Cfap100           |
| chr5  | 115594633 | 115595014 | 0.0010366 | -25.41666 | 14 | 5.3571  | 30.774 | Gcn11l            |
| chr12 | 112739100 | 112739344 | 0.0010366 | -23.74510 | 14 | 3.5714  | 27.317 | Cep170b           |
| chr4  | 148537587 | 148538517 | 0.0010366 | -23.53667 | 26 | 0.96154 | 24.498 | Mtor              |
| chr11 | 4213298   | 4214003   | 0.0010366 | -20.60041 | 31 | 4.4938  | 25.094 | Tbc1d10a          |
| chr17 | 46572565  | 46572747  | 0.0010366 | -19.96713 | 27 | 6.9949  | 26.962 | Ptk7 & Gm26904    |
| chr7  | 25272195  | 25272305  | 0.0010366 | -19.74969 | 15 | 4.1111  | 23.861 | Cic               |
| chr5  | 92952602  | 92952768  | 0.0010537 | -35.28936 | 19 | 0.98684 | 36.276 | Shroom3           |
| chr4  | 118224742 | 118225457 | 0.0010638 | -16.68363 | 42 | 1.636   | 18.32  | Ptpnf             |
| chr5  | 114406327 | 114406602 | 0.0010812 | -25.62358 | 21 | 1.9841  | 27.608 | Ube3b             |
| chr9  | 44433852  | 44434615  | 0.001122  | -24.77311 | 23 | 5.766   | 30.539 | Foxr1             |
| chr3  | 1.54E+08  | 1.54E+08  | 0.001143  | -37.7532  | 21 | 6.2434  | 43.997 |                   |
| chr4  | 1.56E+08  | 1.56E+08  | 0.001143  | -26.7857  | 27 | 6.1728  | 32.959 | Atad3a            |
| chr3  | 55181929  | 55182101  | 0.0011465 | -33.99054 | 25 | 6.7978  | 40.788 | Sohlh2            |
| chr8  | 1.25E+08  | 1.25E+08  | 0.001178  | -30.1587  | 18 | 0.3968  | 30.556 | Disc1             |
| chr19 | 7281803   | 7282128   | 0.001178  | -18.7638  | 25 | 1       | 19.764 | Mark2             |
| chr11 | 78695816  | 78696102  | 0.001181  | -38.938   | 21 | 1.8896  | 40.828 | Nlk               |
| chr18 | 65084221  | 65084377  | 0.0012214 | -37.89281 | 18 | 13.009  | 50.902 | Nedd4l            |
| chr6  | 1.27E+08  | 1.27E+08  | 0.001221  | -32.3927  | 25 | 3.8502  | 36.243 |                   |
| chr10 | 127540617 | 127540892 | 0.0012994 | -24.07643 | 20 | 5.4643  | 29.541 | Lrp1              |
| chr8  | 124292150 | 124292877 | 0.0013312 | -18.60544 | 28 | 0.44643 | 19.052 | Galnt2 & Gm20388  |
| chr10 | 75333531  | 75334042  | 0.0013766 | -20.12826 | 28 | 1.3889  | 21.517 | Adora2a           |
| chrX  | 99072631  | 99072893  | 0.0014134 | -32.96568 | 17 | 0.98039 | 33.946 | Stard8            |
| chr2  | 1.53E+08  | 1.53E+08  | 0.001447  | -29.4954  | 22 | 1.5828  | 31.078 | Nol4l             |
| chr11 | 106690960 | 106691057 | 0.0014756 | -25.52074 | 10 | 1.5476  | 27.068 | Pecam1            |
| chr12 | 117875609 | 117875742 | 0.0014779 | -37.19642 | 10 | 9.6369  | 46.833 | Cdca7l            |
| chr17 | 65867618  | 65867910  | 0.0014779 | -21.07638 | 24 | 3.8194  | 24.896 | Ralbp1            |
| chr7  | 34175411  | 34175523  | 0.00148   | -53.3889  | 10 | 1.25    | 54.639 |                   |
| chr18 | 12732594  | 12732707  | 0.0014798 | -44.16025 | 10 | 12.167  | 56.327 | Ttc39c            |
| chr8  | 94673029  | 94673137  | 0.0014798 | -39.12878 | 10 | 0.95455 | 40.083 | Arl2bp            |
| chr15 | 81682005  | 81682070  | 0.0014858 | -36.60714 | 10 | 1       | 37.607 | L3mbtl2 & Chadl   |
| chr17 | 31447298  | 31447417  | 0.0014883 | -40.61904 | 10 | 7.131   | 47.75  | Pde9a             |
| chr2  | 120494693 | 120494860 | 0.0014883 | -33.54978 | 10 | 0.71429 | 34.264 | Capn3             |
| chr7  | 82771134  | 82771203  | 0.0014938 | -63.45833 | 10 | 19.042  | 82.5   | Efl1              |
| chr17 | 46684210  | 46684477  | 0.001505  | -21.5924  | 22 | 7.4648  | 29.057 | Ppp2r5d & Gm26904 |
| chr4  | 41119703  | 41120167  | 0.0015239 | -25.08192 | 24 | 1.0417  | 26.124 | Nol6              |
| chr15 | 74556758  | 74557444  | 0.0015543 | -25.50236 | 16 | 2.2197  | 27.722 | Adgrb1            |
| chr8  | 121977101 | 121977453 | 0.0016101 | -33.58187 | 19 | 0.87719 | 34.459 | Banp & Gm20388    |
| chr11 | 1.19E+08  | 1.19E+08  | 0.001647  | -59.5635  | 15 | 0.4762  | 60.04  |                   |
| chr5  | 120600475 | 120600664 | 0.0016579 | -21.18734 | 19 | 1.5602  | 22.747 | Iqcd & Rita1      |

|       |           |           |           |           |    |         |        |                                            |
|-------|-----------|-----------|-----------|-----------|----|---------|--------|--------------------------------------------|
|       |           |           |           |           |    |         |        | C1qtnf5 & Gm20444 & Gm49380 & Rnf26 & Mfrp |
| chr9  | 44108561  | 44108872  | 0.0016708 | -23.00562 | 19 | 2.4123  | 25.418 |                                            |
| chr13 | 9223457   | 9223521   | 0.001682  | -34.5714  | 15 | 0.5556  | 35.127 |                                            |
| chr6  | 91783592  | 91783699  | 0.001682  | -27.9221  | 11 | 1.4069  | 29.329 | Grip2                                      |
| chr10 | 80905133  | 80905407  | 0.001682  | -13.9994  | 19 | 0.2924  | 14.292 | Lmnb2                                      |
| chr10 | 127714866 | 127715048 | 0.0016859 | -26.19841 | 15 | 0.33333 | 26.532 | Myo1a                                      |
| chr17 | 47935617  | 47935751  | 0.001706  | -36.2184  | 12 | 0.3788  | 36.597 |                                            |
| chr4  | 134666588 | 134666644 | 0.0017252 | -64.16666 | 12 | 2.9167  | 67.083 | Man1c1                                     |
|       |           |           |           |           |    |         |        | Gm47528 & apolipoprotein A-IV              |
| chr9  | 46241087  | 46241266  | 0.0017707 | -37.64249 | 13 | 2.1795  | 39.822 |                                            |
| chr12 | 1.01E+08  | 1.01E+08  | 0.001771  | -30.7937  | 21 | 1.1905  | 31.984 | Ccdc88c                                    |
| chr16 | 90737433  | 90737564  | 0.00178   | -31.4103  | 13 | 0.9615  | 32.372 |                                            |
| chr4  | 118223272 | 118223371 | 0.0017837 | -35.25510 | 14 | 3.3418  | 38.597 | Ptpnf                                      |
| chr17 | 24641854  | 24642060  | 0.001784  | -26.167   | 13 | 4.8916  | 31.059 | Slc9a3r2                                   |
| chr11 | 120260534 | 120260690 | 0.0017837 | -25.30453 | 12 | 0.59524 | 25.9   | Bahcc1                                     |
| chr8  | 85518019  | 85518147  | 0.0017837 | -24.46428 | 14 | 2.1429  | 26.607 | Gpt2                                       |
| chr10 | 81269004  | 81269474  | 0.001784  | -18.4167  | 25 | 1.2667  | 19.683 | Apba3                                      |
| chr17 | 28533500  | 28533633  | 0.0017994 | -46.31944 | 12 | 0.69444 | 47.014 | Armc12                                     |
| chr1  | 87145976  | 87146156  | 0.001799  | -35.9028  | 12 | 0.6944  | 36.597 | Gm29374                                    |
| chr10 | 14127512  | 14127989  | 0.001799  | -29.3023  | 23 | 1.5217  | 30.824 | Hivep2                                     |
| chr17 | 46726289  | 46726360  | 0.0017994 | -25.86288 | 13 | 3.4615  | 29.324 | Gnmt & Gm26904                             |
| chr3  | 107342948 | 107343126 | 0.0017994 | -15.82160 | 21 | 1.9707  | 17.792 | Gm5279                                     |
| chr13 | 102738042 | 102738474 | 0.0018208 | -23.75000 | 23 | 4.8792  | 28.629 | Cd180 & Mast4                              |
| chr2  | 166131951 | 166132610 | 0.0018375 | -17.94852 | 18 | 7.6995  | 25.648 | Sulf2                                      |
| chr2  | 92980406  | 92980695  | 0.0018375 | -17.85201 | 31 | 3.3603  | 21.212 | Prdm11                                     |
| chr11 | 97059880  | 97060085  | 0.0018408 | -30.29100 | 18 | 0.92593 | 31.217 | Osbpl7                                     |
| chr9  | 44647174  | 44647738  | 0.001904  | -30.7353  | 17 | 0.7353  | 31.471 |                                            |
| chr5  | 136836132 | 136836672 | 0.0019092 | -33.98258 | 18 | 1.8519  | 35.834 | Col26a1                                    |
| chr4  | 1.35E+08  | 1.35E+08  | 0.001944  | -25.7326  | 26 | 2.4679  | 28.201 |                                            |
| chr7  | 99557476  | 99558113  | 0.0020745 | -20.94336 | 17 | 5.0223  | 25.966 | Arrb1                                      |
| chr12 | 77507767  | 77508091  | 0.00212   | -54.0972  | 20 | 0.6944  | 54.792 |                                            |
| chr4  | 1.29E+08  | 1.29E+08  | 0.00212   | -16.5848  | 26 | 3.6195  | 20.204 |                                            |
| chr5  | 125277363 | 125277939 | 0.002149  | -34.75256 | 17 | 2.3284  | 37.081 | Scarb1                                     |
|       |           |           |           |           |    |         |        | Gm48065 & predicted gene, 35154            |
| chr10 | 44598982  | 44599340  | 0.002149  | -26.46358 | 17 | 2.9412  | 29.405 |                                            |
| chr10 | 80410042  | 80410238  | 0.002149  | -21.64215 | 17 | 15.571  | 37.213 | Tcf3                                       |
| chr4  | 1.38E+08  | 1.38E+08  | 0.002202  | -29.6669  | 22 | 0.7792  | 30.446 | Hspg2                                      |
| chr6  | 124859016 | 124859208 | 0.0022063 | -23.80880 | 17 | 4.8529  | 28.662 | Gpr162                                     |
| chr15 | 78676218  | 78676755  | 0.0022063 | -18.32198 | 17 | 2.2059  | 20.528 | Elfn2                                      |
| chr4  | 41121458  | 41121905  | 0.0022207 | -23.63710 | 22 | 1.9148  | 25.552 | Nol6                                       |
| chr14 | 63726874  | 63727248  | 0.0022207 | -22.26890 | 17 | 0.58824 | 22.857 | Mir598 & Xkr6                              |
| chr15 | 86194633  | 86194823  | 0.002268  | -26.2343  | 22 | 7.0184  | 33.253 |                                            |
| chr4  | 138967161 | 138967584 | 0.0023227 | -19.72883 | 30 | 1.9901  | 21.719 | Rnf186                                     |
| chr11 | 117140869 | 117141483 | 0.0023912 | -25.64484 | 16 | 0.78125 | 26.426 | Sec14l1                                    |
| chr7  | 25715815  | 25716054  | 0.0024274 | -23.32927 | 16 | 4.6949  | 28.024 | Ccdc97                                     |
| chr7  | 24557411  | 24557969  | 0.0024497 | -31.64434 | 16 | 3.6012  | 35.246 | Xrcc1                                      |
| chr15 | 1.01E+08  | 1.01E+08  | 0.00245   | -28.187   | 16 | 1.5625  | 29.75  |                                            |
| chr5  | 134502648 | 134502770 | 0.0024812 | -30.62208 | 16 | 9.9508  | 40.573 | Clip2                                      |
| chr17 | 67552329  | 67552701  | 0.002497  | -88.75    | 10 | 5       | 93.75  |                                            |
| chr7  | 114034203 | 114034320 | 0.0024971 | -65.16666 | 10 | 1.6667  | 66.833 | Spon1                                      |
| chr17 | 26280027  | 26280112  | 0.002497  | -62       | 10 | 2.5     | 64.5   | Luc7l                                      |
| chr14 | 122009267 | 122009596 | 0.0024971 | -57.58333 | 10 | 6.25    | 63.833 | Ubac2                                      |
| chr17 | 34735793  | 34735852  | 0.0024971 | -54.87878 | 10 | 8.1212  | 63     | C4b                                        |
| chr8  | 1.2E+08   | 1.2E+08   | 0.002497  | -51.425   | 10 | 2.5     | 53.925 | Adad2                                      |

|       |           |           |           |           |    |         |        |                     |
|-------|-----------|-----------|-----------|-----------|----|---------|--------|---------------------|
| chr18 | 80057289  | 80057477  | 0.0024971 | -49.25000 | 10 | 1.25    | 50.5   | Pard6g              |
| chr11 | 119778324 | 119778588 | 0.0024971 | -49.09523 | 10 | 3.3333  | 52.429 | Rptor               |
| chr18 | 67315359  | 67315747  | 0.0024971 | -47.82312 | 21 | 2.5794  | 50.402 | Impa2               |
| chr9  | 121192595 | 121192724 | 0.0024971 | -45.68777 | 10 | 0.83333 | 46.521 | Ulk4                |
| chr9  | 22005072  | 22005173  | 0.002497  | -45.6429  | 10 | 1.6667  | 47.31  | Prkcsh              |
| chr13 | 49061397  | 49062059  | 0.002497  | -45.6295  | 15 | 0.6364  | 46.266 | Wnk2                |
| chr4  | 137716557 | 137716871 | 0.0024971 | -45.58928 | 10 | 0.5     | 46.089 | Rap1gap             |
| chr9  | 107193666 | 107193808 | 0.0024971 | -44.95039 | 10 | 0.71429 | 45.665 | AA543401 &<br>Dock3 |
| chr11 | 35703120  | 35703176  | 0.0024971 | -44.76028 | 10 | 1.25    | 46.01  | Slit3               |
| chr11 | 1.2E+08   | 1.2E+08   | 0.002497  | -42.8333  | 10 | 2.5     | 45.333 | Slc38a10            |
| chr8  | 8480645   | 8481057   | 0.002497  | -42.3095  | 10 | 9.1905  | 51.5   | Gm31135             |
| chr1  | 192544870 | 192544952 | 0.0024971 | -40.66666 | 10 | 2.5     | 43.167 | Hhat                |
| chr17 | 6019297   | 6019617   | 0.0024971 | -40.26190 | 15 | 0.83333 | 41.095 | Synj2               |
| chr2  | 181240931 | 181241136 | 0.0024971 | -40.25661 | 15 | 9.8175  | 50.074 | Helz2               |
| chr6  | 83304683  | 83304989  | 0.0024971 | -39.93650 | 10 | 1       | 40.937 | Slc4a5              |
| chr15 | 8896267   | 8897105   | 0.002497  | -38.4615  | 13 | 1.9231  | 40.385 |                     |
| chr7  | 125555945 | 125556186 | 0.0024971 | -37.29761 | 10 | 0.41667 | 37.714 | Il4ra               |
| chr4  | 152433436 | 152433638 | 0.0024971 | -37.00000 | 15 | 1.1111  | 38.111 | Kcnab2              |
| chr2  | 126755007 | 126755149 | 0.0024971 | -36.59523 | 10 | 4.1667  | 40.762 | Usp8 & Usp50        |
| chr4  | 58486797  | 58486929  | 0.0024971 | -35.53968 | 10 | 0.55556 | 36.095 | Lpar1               |
| chr17 | 48081993  | 48082069  | 0.0024971 | -35.41666 | 10 | 3.3333  | 38.75  | CAA01189291.2       |
| chr7  | 140869064 | 140869729 | 0.0024971 | -35.19190 | 15 | 2.2906  | 37.482 | Sirt3               |
| chr19 | 61257919  | 61258016  | 0.002497  | -35.165   | 10 | 0.625   | 35.79  |                     |
| chr9  | 56898035  | 56898222  | 0.0024971 | -34.34647 | 16 | 2.0089  | 36.355 | Cspg4               |
| chr4  | 134812587 | 134812768 | 0.0024971 | -33.46428 | 10 | 7.5833  | 41.048 | Maco1               |
| chr15 | 79725152  | 79725330  | 0.0024971 | -33.26785 | 10 | 0.71429 | 33.982 | Sun2                |
| chr6  | 1.23E+08  | 1.23E+08  | 0.002497  | -31.6641  | 10 | 1       | 32.664 |                     |
| chr9  | 65556250  | 65556392  | 0.002497  | -31.5259  | 10 | 0.625   | 32.151 | Plekho2             |
| chr3  | 1.01E+08  | 1.01E+08  | 0.002497  | -30.9167  | 10 | 1.25    | 32.167 |                     |
| chr8  | 122433834 | 122433996 | 0.0024971 | -30.84680 | 15 | 0.83333 | 31.68  | Mvd & Gm20388       |
| chr1  | 34586980  | 34587083  | 0.002497  | -30.6786  | 10 | 1.25    | 31.929 | Amer3               |
| chr4  | 124913950 | 124914102 | 0.0024971 | -30.22023 | 10 | 0.83333 | 31.054 | Epha10              |
| chr12 | 1.12E+08  | 1.12E+08  | 0.002497  | -29.1706  | 15 | 1.6667  | 30.837 |                     |
| chr7  | 126961751 | 126962068 | 0.0024971 | -28.42099 | 10 | 1.25    | 29.671 | Sez6l2              |
| chr11 | 106321850 | 106322291 | 0.0024971 | -28.10990 | 23 | 2.3188  | 30.429 | Scn4a               |
| chr3  | 95167043  | 95167139  | 0.0024971 | -27.94713 | 10 | 3.0952  | 31.042 | Sema6c              |
| chr8  | 123915140 | 123915194 | 0.0024971 | -27.88690 | 10 | 2.25    | 30.137 | Nup133 &<br>Gm20388 |
| chr7  | 68184747  | 68184812  | 0.0024971 | -27.78343 | 15 | 6.6667  | 34.45  | Igf1r               |
| chr11 | 1.17E+08  | 1.17E+08  | 0.002497  | -27.6327  | 23 | 3.0247  | 30.657 | Sept9               |
| chr9  | 15464463  | 15464643  | 0.002497  | -27.3056  | 10 | 5       | 32.306 |                     |
| chr7  | 100470416 | 100470801 | 0.0024971 | -27.18698 | 15 | 1.3333  | 28.52  | Gm10603             |
| chr19 | 6070665   | 6070762   | 0.0024971 | -26.60801 | 10 | 6.4127  | 33.021 | Tm7sf2 & Vps51      |
| chr17 | 33649980  | 33650119  | 0.002497  | -26.2099  | 10 | 0.625   | 26.835 | Hnrnpm              |
| chr12 | 21199753  | 21200008  | 0.0024971 | -26.03769 | 10 | 0.71429 | 26.752 | Asap2               |
| chr4  | 118223874 | 118224463 | 0.0024971 | -24.61743 | 21 | 3.7302  | 28.348 | Ptprf               |
| chr7  | 24670099  | 24670261  | 0.0024971 | -23.51340 | 10 | 3.2751  | 26.788 | Tex101              |
| chr15 | 98839390  | 98839581  | 0.0024971 | -23.45514 | 15 | 3.5556  | 27.011 | Kmt2d               |
| chr10 | 96054120  | 96054648  | 0.0024971 | -22.74494 | 10 | 1.6667  | 24.412 | AC115970.1          |
| chr4  | 141000708 | 141000757 | 0.0024971 | -22.68813 | 10 | 2.6452  | 25.333 | Atp13a2             |
| chr11 | 61336726  | 61337441  | 0.002497  | -22.1398  | 23 | 4.6964  | 26.836 | Slc47a2             |
| chr16 | 89955536  | 89955602  | 0.0024971 | -21.99007 | 10 | 1.4286  | 23.419 | Tiam1               |
| chr19 | 3845555   | 3845656   | 0.002497  | -21.3452  | 10 | 5       | 26.345 | Gm16066             |
| chr5  | 125050721 | 125050972 | 0.0024971 | -20.53199 | 16 | 3.9062  | 24.438 | Ncor2               |
| chr2  | 156069256 | 156069484 | 0.0024971 | -20.35466 | 16 | 0.78125 | 21.136 | Spag4               |
| chr17 | 24157278  | 24157387  | 0.0024971 | -18.03571 | 10 | 1.6667  | 19.702 | Amdhd2              |
| chr5  | 111277366 | 111277531 | 0.0024971 | -17.44576 | 15 | 2.0833  | 19.529 | Ttc28               |

|       |           |           |           |           |    |         |        |                                                                                 |
|-------|-----------|-----------|-----------|-----------|----|---------|--------|---------------------------------------------------------------------------------|
| chr19 | 4154989   | 4156314   | 0.002497  | -14.2485  | 43 | 1.4083  | 15.657 | Ptprcap                                                                         |
| chr5  | 1.28E+08  | 1.28E+08  | 0.002581  | -40.4834  | 14 | 1.1905  | 41.674 | Tmem132d                                                                        |
| chr5  | 1.37E+08  | 1.37E+08  | 0.002581  | -36.6752  | 14 | 4.4643  | 41.139 |                                                                                 |
| chr2  | 119293266 | 119293430 | 0.0025823 | -28.93121 | 14 | 6.6667  | 35.598 | Vps18                                                                           |
| chr11 | 1.18E+08  | 1.18E+08  | 0.00263   | -24.931   | 33 | 3.453   | 28.384 | Engase                                                                          |
| chr19 | 5546361   | 5546798   | 0.002639  | -31.5051  | 14 | 2.381   | 33.886 | Gm31166                                                                         |
| chr7  | 73032277  | 73032436  | 0.002639  | -26.7361  | 12 | 4.1667  | 30.903 |                                                                                 |
| chr10 | 127007690 | 127008168 | 0.002639  | -26.40022 | 14 | 5.0028  | 31.403 | Avil                                                                            |
| chr12 | 54817989  | 54818400  | 0.00264   | -25.469   | 11 | 2.2727  | 27.742 |                                                                                 |
| chr12 | 99349388  | 99349891  | 0.002642  | -44.8214  | 14 | 5.3571  | 50.179 | Foxn3 & 3300002A11Rik                                                           |
| chr1  | 89713045  | 89713295  | 0.0026416 | -41.00481 | 14 | 1.3393  | 42.344 | Agap1                                                                           |
| chr11 | 120067863 | 120068021 | 0.0026416 | -31.46422 | 14 | 2.0604  | 33.525 | Cep131                                                                          |
| chr11 | 69448115  | 69448260  | 0.0026416 | -30.79506 | 14 | 2.415   | 33.21  | Dnah2                                                                           |
| chr9  | 57796555  | 57796623  | 0.0026416 | -23.67394 | 12 | 10.417  | 34.091 | Gm17231 & AT rich interactive domain 3B (BRIGHT-like)                           |
| chr17 | 25384790  | 25385613  | 0.0026416 | -22.37268 | 29 | 7.4035  | 29.776 | Cacna1h                                                                         |
| chr5  | 123614199 | 123614318 | 0.0026493 | -26.27902 | 11 | 0.64935 | 26.928 | Clip1                                                                           |
| chr4  | 140823579 | 140823719 | 0.0026512 | -35.96681 | 11 | 4.4877  | 40.455 | Padi1                                                                           |
| chr19 | 6993591   | 6994171   | 0.0026574 | -39.54545 | 11 | 1.1364  | 40.682 | Nudt22                                                                          |
| chr19 | 40454466  | 40454867  | 0.0026574 | -26.56450 | 11 | 2.4242  | 28.989 | Sorbs1                                                                          |
| chr15 | 99409233  | 99409493  | 0.0026574 | -13.20332 | 13 | 3.8462  | 17.049 | Tmbim6                                                                          |
| chr3  | 132828724 | 132828840 | 0.0026789 | -36.68831 | 11 | 14.848  | 51.537 | Tbck                                                                            |
| chr16 | 3974216   | 3974662   | 0.0026789 | -28.79120 | 13 | 0.96154 | 29.753 | Nlrc3                                                                           |
| chr11 | 102001287 | 102001724 | 0.0026814 | -54.12698 | 12 | 2.0833  | 56.21  | Mpp3                                                                            |
| chr18 | 81458374  | 81459379  | 0.002681  | -41.8956  | 13 | 1.5385  | 43.434 |                                                                                 |
| chr5  | 1.18E+08  | 1.18E+08  | 0.002681  | -40.7688  | 12 | 1.3889  | 42.158 |                                                                                 |
| chr7  | 105389575 | 105389654 | 0.0026814 | -39.32539 | 12 | 4.1667  | 43.492 | Fam160a2                                                                        |
| chr9  | 68927590  | 68927658  | 0.0026814 | -38.64748 | 12 | 3.7269  | 42.374 | Rora                                                                            |
| chr11 | 1.16E+08  | 1.16E+08  | 0.002681  | -36.4927  | 13 | 0.7692  | 37.262 |                                                                                 |
| chr2  | 28549377  | 28549470  | 0.0026814 | -33.41922 | 13 | 4.5529  | 37.972 | Ralgds                                                                          |
| chr7  | 127343512 | 127343607 | 0.0026814 | -30.40246 | 13 | 3.2051  | 33.608 | Zfp768                                                                          |
| chr4  | 125650471 | 125650568 | 0.0026814 | -29.59096 | 13 | 8.4615  | 38.053 | Grik3                                                                           |
| chr11 | 68990906  | 68992501  | 0.0026814 | -23.20151 | 40 | 4.6646  | 27.866 | Pfas                                                                            |
| chr15 | 85038658  | 85039111  | 0.0026814 | -22.62000 | 13 | 0.29586 | 22.916 | Fam118a                                                                         |
| chr17 | 34853826  | 34853990  | 0.0026814 | -20.51136 | 22 | 2.5216  | 23.033 | Nelfe                                                                           |
| chr1  | 34819608  | 34819962  | 0.002681  | -19.281   | 13 | 1.2821  | 20.563 | Fam168b                                                                         |
| chr10 | 94578975  | 94579138  | 0.002687  | -51.7741  | 12 | 3.836   | 55.61  | Tmcc3os & transmembrane and coiled coil domains 3                               |
| chr1  | 38884371  | 38884850  | 0.0026872 | -38.44471 | 12 | 1.3889  | 39.834 | Gm37707 & carbohydrate sulfotransferase                                         |
| chr11 | 1E+08     | 1E+08     | 0.002687  | -28.8798  | 24 | 4.89    | 33.77  |                                                                                 |
| chr6  | 125467328 | 125467573 | 0.0026872 | -28.25595 | 12 | 3.1415  | 31.397 | Cd9                                                                             |
| chr10 | 81594367  | 81594433  | 0.002687  | -25.2187  | 12 | 2.3611  | 27.58  | Tle6                                                                            |
| chr4  | 1.25E+08  | 1.25E+08  | 0.002687  | -21.0681  | 12 | 0.6944  | 21.763 | Epha10                                                                          |
| chr2  | 26400118  | 26400913  | 0.0027392 | -32.05357 | 20 | 1.4583  | 33.512 | Inpp5e                                                                          |
| chr4  | 85558544  | 85558973  | 0.0028483 | -44.99299 | 17 | 2.9412  | 47.934 | Sh3gl2 & Adamts1                                                                |
| chr16 | 18501007  | 18501304  | 0.002865  | -23.0258  | 17 | 2.4664  | 25.492 | Rtl10 & guanine nucleotide binding protein (G protein), beta polypeptide 1-like |



|       |           |           |           |           |    |         |        |                                                              |
|-------|-----------|-----------|-----------|-----------|----|---------|--------|--------------------------------------------------------------|
| chr10 | 81311574  | 81312011  | 0.0029176 | -20.51628 | 27 | 9.8856  | 30.402 | Pip5k1c                                                      |
| chr11 | 113523363 | 113523504 | 0.0029207 | -26.76937 | 17 | 2.7241  | 29.493 | Slc39a11                                                     |
| chr10 | 43511284  | 43511605  | 0.002933  | -9.71671  | 52 | 2.1337  | 11.85  | Bend3                                                        |
| chr4  | 1.07E+08  | 1.07E+08  | 0.00296   | -29.6166  | 17 | 3.8025  | 33.419 | Ttc22                                                        |
| chr7  | 24433217  | 24433370  | 0.0032074 | -18.51663 | 19 | 3.8482  | 22.365 | Irgc1                                                        |
| chr10 | 99759096  | 99759302  | 0.003262  | -26.6667  | 19 | 1.5351  | 28.202 | Csl & Gm47578                                                |
| chr15 | 76911339  | 76911609  | 0.0032827 | -10.35499 | 37 | 1.1712  | 11.526 | Zfp647                                                       |
| chr5  | 4825684   | 4825894   | 0.0033057 | -31.03801 | 19 | 3.9474  | 34.985 | Cdk14                                                        |
| chr19 | 5918005   | 5918164   | 0.00333   | -28.4638  | 16 | 2.0833  | 30.547 | Cdc42ep2                                                     |
| chr4  | 130926979 | 130927588 | 0.0033355 | -22.20270 | 19 | 2.6292  | 24.832 | Laptm5                                                       |
| chr7  | 133765813 | 133766003 | 0.0033355 | -19.76190 | 19 | 3.4868  | 23.249 | Dhx32                                                        |
| chr15 | 58028864  | 58029624  | 0.0033523 | -29.69298 | 19 | 1.3158  | 31.009 | 9130401M01Rik & Gm29394                                      |
| chr7  | 1.11E+08  | 1.11E+08  | 0.003371  | -20.9286  | 19 | 1.7544  | 22.683 |                                                              |
| chr5  | 1.24E+08  | 1.24E+08  | 0.003411  | -22.3417  | 19 | 3.7531  | 26.095 | Pitpnm2                                                      |
| chr11 | 120479590 | 120479834 | 0.0034439 | -23.78832 | 19 | 2.1961  | 25.984 | Hgs & Hgs                                                    |
| chr9  | 51157783  | 51158265  | 0.003447  | -26.2669  | 19 | 1.3158  | 27.583 | Gm32742                                                      |
| chr10 | 29196635  | 29196779  | 0.0034737 | -25.57256 | 21 | 2.466   | 28.039 | Soga3                                                        |
| chr6  | 1.16E+08  | 1.16E+08  | 0.00351   | -22.9464  | 16 | 1.0417  | 23.988 | Gm44180                                                      |
| chr5  | 1.21E+08  | 1.21E+08  | 0.003522  | -31.1083  | 21 | 4.1752  | 35.283 | Hectd4                                                       |
| chr10 | 21304220  | 21305069  | 0.003526  | -31.10750 | 21 | 1.9841  | 33.092 | Hbs1l                                                        |
| chr14 | 31176825  | 31177069  | 0.0036114 | -18.84620 | 21 | 3.7501  | 22.596 | Nisch                                                        |
| chr5  | 67479162  | 67479575  | 0.003877  | -21.0773  | 27 | 1.8695  | 22.947 |                                                              |
| chr12 | 112176115 | 112176302 | 0.003999  | -14.34105 | 22 | 6.0606  | 20.402 | Kif26a                                                       |
| chr15 | 80358583  | 80358909  | 0.0040315 | -19.37839 | 15 | 1.5412  | 20.92  | Cacna1i                                                      |
| chr5  | 143717025 | 143717270 | 0.0040409 | -28.15945 | 15 | 1       | 29.159 | Usp42                                                        |
| chr4  | 149815118 | 149815363 | 0.0040431 | -28.05776 | 18 | 1.5653  | 29.623 | Gm13064                                                      |
| chr2  | 166583138 | 166583281 | 0.0040732 | -24.13764 | 15 | 4.3957  | 28.533 | Prex1                                                        |
| chr11 | 82901682  | 82901932  | 0.004112  | -25.49713 | 18 | 1.5079  | 27.005 | Nle1                                                         |
| chr6  | 1.12E+08  | 1.12E+08  | 0.004152  | -28.7831  | 18 | 4.6627  | 33.446 | Oxtr                                                         |
| chr1  | 72863855  | 72864157  | 0.004186  | -15.9348  | 18 | 0.6944  | 16.629 | Igfbp5                                                       |
| chr8  | 125087244 | 125087649 | 0.004218  | -20.66468 | 18 | 5.0926  | 25.757 | Disc1                                                        |
| chr15 | 100782971 | 100783179 | 0.0042263 | -26.17504 | 18 | 0.61728 | 26.792 | Slc4a8                                                       |
| chr4  | 56915585  | 56916309  | 0.0043743 | -32.47294 | 22 | 1.1364  | 33.609 | Tmem245                                                      |
| chr18 | 38198716  | 38199003  | 0.0043743 | -26.31887 | 22 | 1.9372  | 28.256 | Pcdh1                                                        |
| chr5  | 144877203 | 144877487 | 0.004401  | -23.87188 | 14 | 2.4008  | 26.273 | Smurf1                                                       |
| chr1  | 36312291  | 36312582  | 0.0044706 | -34.36649 | 14 | 7.1429  | 41.509 | Arid5a                                                       |
| chr18 | 63658032  | 63658545  | 0.004483  | -27.6801  | 14 | 2.9762  | 30.656 |                                                              |
| chr2  | 24386598  | 24386737  | 0.0045015 | -34.22619 | 14 | 3.869   | 38.095 | Psd4                                                         |
| chr10 | 81048659  | 81048898  | 0.004522  | -22.9208  | 14 | 1.7361  | 24.657 | Sgta                                                         |
| chr5  | 1.14E+08  | 1.14E+08  | 0.004532  | -36.7143  | 10 | 1.25    | 37.964 |                                                              |
| chr16 | 19348129  | 19348218  | 0.004549  | -77.5     | 10 | 10      | 87.5   |                                                              |
| chr12 | 111217149 | 111217231 | 0.0045488 | -64.16666 | 10 | 11.667  | 75.833 | Traf3                                                        |
| chrX  | 11899122  | 11899395  | 0.004549  | -61.2024  | 10 | 3.2143  | 64.417 |                                                              |
| chr6  | 128083558 | 128083703 | 0.0045488 | -58.45238 | 10 | 4.0476  | 62.5   | Tspan9                                                       |
| chr5  | 115588826 | 115589059 | 0.0045488 | -38.75198 | 10 | 5.623   | 44.375 | Gcn11l                                                       |
| chr2  | 14945783  | 14945890  | 0.0045488 | -38.52381 | 10 | 8.1429  | 46.667 | Gm37437 & calcium channel, voltage-dependent, beta 2 subunit |
| chr18 | 13933755  | 13934267  | 0.004549  | -35.6587  | 10 | 2.1429  | 37.802 | Zfp521                                                       |
| chr7  | 126235782 | 126235923 | 0.0045488 | -35.45238 | 10 | 0.71429 | 36.167 | 1700123J17Rik                                                |
| chr17 | 56767149  | 56767262  | 0.0045488 | -30.87469 | 10 | 1.25    | 32.125 | Dus3l                                                        |
| chr17 | 49926614  | 49927213  | 0.004549  | -30.7464  | 10 | 1.4286  | 32.175 |                                                              |
| chr6  | 86695983  | 86696180  | 0.0045488 | -29.54040 | 10 | 2.7222  | 32.263 | Gmcl1                                                        |
| chr14 | 51434538  | 51434858  | 0.0045488 | -27.58333 | 10 | 0.83333 | 28.417 | Gm7247                                                       |
| chr18 | 56761590  | 56761896  | 0.0045488 | -27.27200 | 10 | 1.25    | 28.522 | March3                                                       |

|       |           |           |           |           |    |         |        |                                        |
|-------|-----------|-----------|-----------|-----------|----|---------|--------|----------------------------------------|
| chr7  | 4920445   | 4920513   | 0.0045488 | -27.19642 | 10 | 1.6667  | 28.863 | Zfp628                                 |
| chr18 | 80418379  | 80418648  | 0.0045488 | -25.92796 | 10 | 3.0556  | 28.984 | Ctdp1                                  |
| chr17 | 45696813  | 45696943  | 0.0045488 | -24.94101 | 10 | 1.4583  | 26.399 | Mrpl14                                 |
| chr13 | 52968594  | 52968690  | 0.0045488 | -24.82720 | 10 | 1.25    | 26.077 | Nfil3                                  |
| chr5  | 143555775 | 143555894 | 0.0045488 | -24.77453 | 10 | 1       | 25.775 | Fam220a                                |
| chr14 | 64803404  | 64803449  | 0.0045488 | -23.19642 | 10 | 1.6667  | 24.863 | Kif13b                                 |
| chr11 | 1.03E+08  | 1.03E+08  | 0.004549  | -23.1162  | 17 | 4.3056  | 27.422 | Plcd3 & Gm26668                        |
| chr5  | 1.4E+08   | 1.4E+08   | 0.004549  | -20.7905  | 10 | 5.8234  | 26.614 | Ints1                                  |
| chr13 | 54719030  | 54719262  | 0.0045488 | -19.88257 | 10 | 2.2917  | 22.174 | Cdhr2                                  |
| chr8  | 120739841 | 120739889 | 0.0045488 | -19.01388 | 10 | 5       | 24.014 | Irf8 & Gm20388                         |
| chr19 | 4279825   | 4281467   | 0.0045488 | -18.79984 | 38 | 4.4956  | 23.295 | Ankrd13d                               |
| chr3  | 82046485  | 82046723  | 0.004549  | -40.69597 | 13 | 0.54945 | 41.245 | Gucy1b1                                |
| chr2  | 1.67E+08  | 1.67E+08  | 0.004549  | -27.7273  | 25 | 1.5857  | 29.313 | Ptgis                                  |
| chr10 | 60379225  | 60379510  | 0.004581  | -36.7811  | 13 | 1.6026  | 38.384 | Cdh23                                  |
| chr13 | 37930883  | 37931068  | 0.0045813 | -21.67619 | 25 | 2.7333  | 24.41  | Rreb1                                  |
| chr11 | 74437783  | 74438175  | 0.004591  | -41.12637 | 13 | 0.96154 | 42.088 | Rap1gap2                               |
| chr5  | 121852544 | 121852654 | 0.004591  | -18.11202 | 13 | 2.2436  | 20.356 | Pheta1                                 |
| chr15 | 89336341  | 89336587  | 0.0045977 | -38.50588 | 13 | 4.1026  | 42.608 | Miox                                   |
| chr15 | 83909009  | 83909316  | 0.004627  | -39.9374  | 13 | 3.2036  | 43.141 | Efcab6                                 |
| chr11 | 69430831  | 69430906  | 0.004627  | -25.42582 | 13 | 4.0522  | 29.478 | Dnah2                                  |
| chr4  | 118623289 | 118623433 | 0.004627  | -25.16435 | 17 | 7.5912  | 32.756 | Ebna1bp2                               |
| chr11 | 79686308  | 79686511  | 0.0046358 | -30.78435 | 12 | 0.32051 | 31.105 | Rab11fip4                              |
| chr15 | 78911509  | 78911684  | 0.0046358 | -26.09623 | 12 | 5.3819  | 31.478 | Gm49510 & SH3-domain binding protein 1 |
| chr8  | 70452566  | 70452667  | 0.0046358 | -23.45386 | 17 | 1.208   | 24.662 | Klhl26                                 |
| chr10 | 69372691  | 69373524  | 0.004636  | -22.0816  | 23 | 3.5826  | 25.664 | Gm47211                                |
| chrX  | 99487358  | 99487487  | 0.004659  | -49.4312  | 12 | 2.748   | 52.179 |                                        |
| chr17 | 6193518   | 6193762   | 0.0046666 | -33.33333 | 17 | 7.3529  | 40.686 | Tulp4                                  |
| chr13 | 1.12E+08  | 1.12E+08  | 0.004667  | -33.1513  | 17 | 7.8992  | 41.05  |                                        |
| chr8  | 11516363  | 11516472  | 0.0046666 | -31.52928 | 12 | 1.6056  | 33.135 | Cars2                                  |
| chr5  | 1.01E+08  | 1.01E+08  | 0.004667  | -29.0377  | 12 | 0.6944  | 29.732 |                                        |
| chr5  | 114394476 | 11439473  | 0.0046666 | -28.97058 | 17 | 10.294  | 39.265 | Ube3b                                  |
| chr4  | 140824612 | 140824949 | 0.0046666 | -26.02067 | 17 | 6.1331  | 32.154 | Padi1                                  |
| chr4  | 128589112 | 128589368 | 0.0046666 | -22.82252 | 17 | 1.4706  | 24.293 | Zscan20                                |
| chr2  | 93428871  | 93429669  | 0.0046666 | -21.63377 | 23 | 0.59006 | 22.224 | Cd82                                   |
| chr2  | 25295818  | 25296291  | 0.004667  | -20.1155  | 17 | 0.5882  | 20.704 | Grin1 & Grin1os                        |
| chr8  | 35383992  | 35384204  | 0.0046666 | -19.37441 | 17 | 2.9412  | 22.316 | Ppp1r3b                                |
| chr5  | 33214360  | 33214640  | 0.004676  | -20.0289  | 12 | 1.5046  | 21.533 | Spon2                                  |
| chr17 | 68150087  | 68150744  | 0.0046833 | -48.24570 | 12 | 1.3889  | 49.635 | AC151280.3                             |
| chr11 | 100802468 | 100802767 | 0.004686  | -59.17658 | 12 | 7.1925  | 66.369 | Stat5b                                 |
| chr14 | 27091977  | 27092214  | 0.0046938 | -45.39682 | 12 | 2.9167  | 48.313 | Il17rd                                 |
| chr7  | 19646751  | 19646908  | 0.0046938 | -38.66402 | 12 | 1.3889  | 40.053 | Clptm1                                 |
| chr8  | 85096635  | 85096719  | 0.0046972 | -32.75463 | 12 | 0.52083 | 33.275 | Man2b1                                 |
| chr17 | 34594790  | 34595332  | 0.0047147 | -29.86542 | 23 | 4.9482  | 34.814 | Pbx2                                   |
| chr4  | 45043349  | 45043856  | 0.00479   | -37.5896  | 23 | 5.723   | 43.313 | Fbxo10                                 |
| chr11 | 36024260  | 36024421  | 0.0053119 | -40.00000 | 16 | 1.6667  | 41.667 | Tenm2                                  |
| chr9  | 122183381 | 122183949 | 0.0053499 | -34.60869 | 16 | 4.8556  | 39.464 | Ano10                                  |
| chr8  | 120611243 | 120611832 | 0.0053499 | -23.62283 | 22 | 2.5758  | 26.199 | 1190005I06Rik & Gm27021 & Gm20388      |
| chr5  | 115602485 | 115602586 | 0.0053674 | -19.29935 | 16 | 3.3854  | 22.685 | Gcn111                                 |
| chr4  | 1.36E+08  | 1.36E+08  | 0.005368  | -21.9204  | 16 | 0.4808  | 22.401 | Il22ra1                                |
| chr11 | 1.04E+08  | 1.04E+08  | 0.00541   | -24.3417  | 16 | 1.1084  | 25.45  | Wnt3                                   |
| chr13 | 1.04E+08  | 1.04E+08  | 0.00543   | -49.9826  | 16 | 3.6632  | 53.646 |                                        |
| chr6  | 1.14E+08  | 1.14E+08  | 0.00543   | -26.6781  | 16 | 0.7813  | 27.459 |                                        |
| chr2  | 85041124  | 85041601  | 0.0054773 | -33.94593 | 16 | 1.0417  | 34.988 | Ssrp1                                  |
| chr13 | 56422956  | 56423341  | 0.005477  | -33.4673  | 16 | 1.5625  | 35.03  |                                        |

|       |           |           |           |           |    |         |        |                         |
|-------|-----------|-----------|-----------|-----------|----|---------|--------|-------------------------|
| chr1  | 152833745 | 152834353 | 0.0054773 | -26.15530 | 16 | 3.0114  | 29.167 | Ncf2                    |
| chr7  | 27580355  | 27580717  | 0.0054773 | -24.75125 | 16 | 4.3837  | 29.135 | 2310022A10Rik           |
| chr3  | 41596456  | 41596784  | 0.005477  | -14.5275  | 16 | 1.3021  | 15.83  | Jade1                   |
| chr16 | 11828126  | 11828380  | 0.0055082 | -20.85813 | 16 | 5.0087  | 25.867 | Cpped1                  |
| chr15 | 76174652  | 76174764  | 0.0057737 | -15.27874 | 15 | 2.3165  | 17.595 | Plec                    |
| chr4  | 117864722 | 117865528 | 0.0058374 | -26.68335 | 24 | 4.7768  | 31.46  | Slc6a9 &<br>Gm17114     |
| chr6  | 83770784  | 83771498  | 0.0059475 | -20.12258 | 24 | 0.69444 | 20.817 | Tex261                  |
| chr9  | 119694225 | 119694304 | 0.0059545 | -26.41827 | 15 | 6.2576  | 32.676 | Scn10a                  |
| chr19 | 6314116   | 6314523   | 0.0061898 | -17.02008 | 15 | 1.6667  | 18.687 | Cdc42bpg                |
| chr3  | 152619994 | 152620137 | 0.0062138 | -23.86348 | 15 | 1.4601  | 25.324 | Ak5                     |
| chr5  | 1.06E+08  | 1.06E+08  | 0.006266  | -35.4924  | 22 | 2.1266  | 37.619 | Gm5987                  |
| chr17 | 25608255  | 25608447  | 0.0062754 | -25.55250 | 15 | 2.0635  | 27.616 | Lmf1                    |
| chr8  | 72268484  | 72268689  | 0.006337  | -16.165   | 20 | 6.1667  | 22.332 |                         |
| chr4  | 149066543 | 149066674 | 0.0063421 | -40.01587 | 15 | 2.5     | 42.516 | Pex14                   |
| chr8  | 22917314  | 22918159  | 0.006342  | -37.0675  | 15 | 3.3056  | 40.373 | Kat6a                   |
| chr3  | 67053319  | 67054085  | 0.0063421 | -34.09447 | 18 | 2.6885  | 36.783 | Rsrc1                   |
| chr5  | 31260711  | 31261469  | 0.0063421 | -24.02290 | 20 | 1.7143  | 25.737 | Ift172                  |
| chr6  | 86298692  | 86298956  | 0.006382  | -40.8399  | 15 | 1.9444  | 42.784 |                         |
| chr5  | 131190148 | 131190998 | 0.0063822 | -37.84920 | 15 | 1.6667  | 39.516 | Galnt17                 |
| chr4  | 152540146 | 152540322 | 0.0063822 | -27.01455 | 15 | 1.6667  | 28.681 | Nphp4                   |
| chr17 | 31215153  | 31215222  | 0.0063847 | -26.34920 | 15 | 3.873   | 30.222 | Ubash3a                 |
| chr8  | 126024765 | 126025167 | 0.0064069 | -21.07440 | 20 | 9.8214  | 30.896 | Kcnk1                   |
| chr19 | 43656988  | 43657161  | 0.006415  | -24.373   | 15 | 1.1111  | 25.484 |                         |
| chr5  | 145207315 | 145207722 | 0.0064199 | -25.98630 | 14 | 7.1429  | 33.129 | Zkscan5                 |
| chr2  | 1.74E+08  | 1.74E+08  | 0.006505  | -28.9951  | 20 | 4.5833  | 33.578 |                         |
| chr11 | 100565711 | 100565963 | 0.0065536 | -38.38457 | 14 | 1.8323  | 40.217 | Ttc25                   |
| chr15 | 83651719  | 83652061  | 0.006797  | -20.8323  | 34 | 3.474   | 24.306 | Scube1                  |
| chr12 | 111322782 | 111322997 | 0.0068476 | -29.98120 | 19 | 8.4211  | 38.402 | Cdc42bpb                |
| chr5  | 1.01E+08  | 1.01E+08  | 0.006893  | -81.25    | 10 | 3.75    | 85     |                         |
| chr5  | 1.2E+08   | 1.2E+08   | 0.006893  | -79.0714  | 10 | 4.4286  | 83.5   |                         |
| chr11 | 74534738  | 74535050  | 0.0068931 | -77.50000 | 10 | 2.5     | 80     | Rap1gap2                |
| chr5  | 67112986  | 67113395  | 0.006893  | -73.4524  | 10 | 0.7143  | 74.167 |                         |
| chr13 | 1.02E+08  | 1.02E+08  | 0.006893  | -68.5595  | 10 | 5       | 73.56  |                         |
| chr4  | 1.53E+08  | 1.53E+08  | 0.006893  | -59.3777  | 10 | 1.25    | 60.628 |                         |
| chr11 | 5835506   | 5835765   | 0.0068931 | -58.33333 | 10 | 5       | 63.333 | Polm                    |
| chr11 | 97747197  | 97747467  | 0.0068931 | -58.03373 | 10 | 1.1806  | 59.214 | Cwc25                   |
| chr1  | 12976903  | 12977238  | 0.006893  | -56       | 10 | 2.5     | 58.5   | Slco5a1                 |
| chr8  | 1.15E+08  | 1.15E+08  | 0.006893  | -55.6667  | 10 | 2.5     | 58.167 | Wwox                    |
| chr3  | 5826952   | 5827186   | 0.006893  | -54.3849  | 12 | 1.875   | 56.26  |                         |
| chr7  | 25301359  | 25301616  | 0.0068931 | -52.59523 | 10 | 1.6667  | 54.262 | Prr19                   |
| chr3  | 1.08E+08  | 1.08E+08  | 0.006893  | -52.0635  | 10 | 2.5198  | 54.583 |                         |
| chr11 | 77293458  | 77293495  | 0.0068931 | -51.04166 | 12 | 2.0833  | 53.125 | Gm12346 & Ssh2          |
| chr15 | 24358219  | 24358594  | 0.0068931 | -50.97222 | 10 | 1.1111  | 52.083 | Gm36147 &<br>AC131068.1 |
| chr8  | 12872614  | 12872903  | 0.0068931 | -49.94841 | 10 | 0.35714 | 50.306 | Gm15347                 |
| chr7  | 141644608 | 141644989 | 0.0068931 | -49.58333 | 10 | 1.25    | 50.833 | Muc6                    |
| chr12 | 55501063  | 55501321  | 0.006893  | -49.1667  | 10 | 3.75    | 52.917 |                         |
| chr17 | 6069170   | 6069528   | 0.0068931 | -48.81944 | 12 | 1.3889  | 50.208 | Serac1                  |
| chr12 | 70729452  | 70729624  | 0.0068931 | -48.18452 | 10 | 1.875   | 50.06  | Gm40437                 |
| chr11 | 19145159  | 19145392  | 0.006893  | -47.8929  | 10 | 1.6667  | 49.56  |                         |
| chr11 | 78894832  | 78895038  | 0.006893  | -47.7045  | 10 | 1.25    | 48.955 |                         |
| chr6  | 87634170  | 87634293  | 0.0068931 | -47.25000 | 10 | 2.5     | 49.75  | Aplf                    |
| chr18 | 75126609  | 75126853  | 0.0068931 | -46.74768 | 12 | 1.1905  | 47.938 | Dym                     |
| chr16 | 13521659  | 13521981  | 0.006893  | -45.0298  | 12 | 0.5952  | 45.625 |                         |
| chr11 | 21976680  | 21976994  | 0.006893  | -44.9735  | 12 | 1.713   | 46.687 |                         |
| chr3  | 131180433 | 131180666 | 0.0068931 | -44.66666 | 10 | 1.6667  | 46.333 | Lef1                    |
| chr8  | 93860436  | 93860562  | 0.0068931 | -44.55952 | 10 | 5.8333  | 50.393 | Gnao1                   |

|       |           |           |           |           |    |         |        |                                               |
|-------|-----------|-----------|-----------|-----------|----|---------|--------|-----------------------------------------------|
| chr18 | 80971404  | 80971506  | 0.0068931 | -44.28736 | 12 | 0.92593 | 45.213 | Sall3                                         |
| chr13 | 1.01E+08  | 1.01E+08  | 0.006893  | -43.75    | 12 | 1.0417  | 44.792 |                                               |
| chr4  | 1.18E+08  | 1.18E+08  | 0.006893  | -43.6109  | 10 | 5.3295  | 48.94  | Szt2                                          |
| chr12 | 106508215 | 106508468 | 0.0068931 | -43.14285 | 10 | 3.25    | 46.393 | Gm17031                                       |
| chr5  | 137637393 | 137637603 | 0.0068931 | -42.66666 | 10 | 0.83333 | 43.5   | Lrch4 & Gm20605                               |
| chr8  | 94517150  | 94517400  | 0.0068931 | -42.50000 | 10 | 2.5     | 45     | Nlrc5                                         |
| chr18 | 36682757  | 36682988  | 0.0068931 | -42.34693 | 14 | 1.1905  | 43.537 | Slc35a4                                       |
| chr3  | 1.6E+08   | 1.6E+08   | 0.006893  | -42.125   | 10 | 3.9583  | 46.083 |                                               |
| chr10 | 60392477  | 60393006  | 0.0068931 | -41.66813 | 27 | 3.2481  | 44.916 | Cdh23                                         |
| chr6  | 137797938 | 137798083 | 0.0068931 | -41.27958 | 10 | 3.6667  | 44.946 | Dera                                          |
| chr8  | 95248783  | 95248981  | 0.0068931 | -40.92803 | 12 | 0.46296 | 41.391 | Cngb1                                         |
| chr16 | 11828414  | 11828586  | 0.006893  | -40.9099  | 14 | 3.4354  | 44.345 | Cpped1                                        |
| chr14 | 45175462  | 45175607  | 0.006893  | -40.8333  | 10 | 1.6667  | 42.5   | Txndc16                                       |
| chr5  | 1.29E+08  | 1.29E+08  | 0.006893  | -40.75    | 10 | 1       | 41.75  |                                               |
| chr19 | 10393912  | 10394169  | 0.0068931 | -40.38311 | 10 | 0.41667 | 40.8   | Syt7                                          |
| chr17 | 31849641  | 31849795  | 0.0068931 | -40.08333 | 10 | 1       | 41.083 | Sik1                                          |
| chr5  | 67398311  | 67398628  | 0.006893  | -39.8309  | 23 | 1.1111  | 40.942 | Bend4                                         |
| chr4  | 109427725 | 109428158 | 0.0068931 | -39.78571 | 10 | 2       | 41.786 | Ttc39a                                        |
| chr15 | 73942563  | 73942894  | 0.006893  | -39.7406  | 14 | 2.6786  | 42.419 |                                               |
| chr13 | 93503030  | 93503087  | 0.006893  | -39.6528  | 12 | 4.1667  | 43.819 |                                               |
| chr1  | 139470199 | 139470684 | 0.0068931 | -39.50549 | 13 | 5       | 44.505 | Aspm                                          |
| chr8  | 94860645  | 94860721  | 0.0068931 | -39.50469 | 10 | 2.5     | 42.005 | Polr2c                                        |
| chr10 | 75895093  | 75895167  | 0.006893  | -39.4702  | 10 | 0.8333  | 40.304 | Derl3                                         |
| chr16 | 46897755  | 46898270  | 0.006893  | -39.388   | 13 | 2.5321  | 41.92  |                                               |
| chr5  | 86792969  | 86793453  | 0.0068931 | -39.06547 | 10 | 3.8095  | 42.875 | Gm43055                                       |
| chr3  | 108077682 | 108077859 | 0.0068931 | -38.78968 | 10 | 3.5     | 42.29  | Ampd2                                         |
| chr15 | 1.03E+08  | 1.03E+08  | 0.006893  | -38.7401  | 12 | 3.4127  | 42.153 |                                               |
| chrX  | 7939754   | 7939842   | 0.006893  | -38.7222  | 10 | 1.25    | 39.972 | Hdac6                                         |
| chr1  | 1.36E+08  | 1.36E+08  | 0.006893  | -38.6905  | 10 | 1.6667  | 40.357 |                                               |
| chr19 | 3339863   | 3340098   | 0.0068931 | -38.64718 | 11 | 1.1364  | 39.784 | Cpt1a                                         |
| chr8  | 31367859  | 31368229  | 0.006893  | -38.619   | 10 | 1       | 39.619 |                                               |
| chr3  | 1.46E+08  | 1.46E+08  | 0.006893  | -38.3333  | 13 | 1.9231  | 40.256 |                                               |
| chr5  | 101981331 | 101981610 | 0.0068931 | -38.25000 | 10 | 1.6667  | 39.917 | Wdfy3                                         |
| chr19 | 6911292   | 6911872   | 0.006893  | -38.1819  | 19 | 2.2974  | 40.479 | Esrra                                         |
| chr4  | 101575110 | 101575317 | 0.0068931 | -37.81250 | 12 | 5.5556  | 43.368 | Dnajc6                                        |
| chr7  | 24978619  | 24978960  | 0.006893  | -37.6786  | 12 | 0.8333  | 38.512 | Atp1a3                                        |
| chr5  | 73317412  | 73317694  | 0.006893  | -37.0879  | 13 | 1.5385  | 38.626 |                                               |
| chr2  | 30452679  | 30452809  | 0.006893  | -37.004   | 12 | 2.6786  | 39.683 |                                               |
| chr8  | 91519328  | 91519396  | 0.0068931 | -36.91666 | 10 | 3.25    | 40.167 | Fto                                           |
| chr4  | 139212563 | 139212627 | 0.0068931 | -36.83333 | 10 | 1       | 37.833 | Capzb                                         |
| chr15 | 102334266 | 102334403 | 0.0068931 | -36.40542 | 12 | 2.5694  | 38.975 | Myg1                                          |
| chr7  | 126370257 | 126370362 | 0.0068931 | -36.30557 | 17 | 7.0472  | 43.353 | Spns1                                         |
| chr5  | 66546703  | 66547249  | 0.0068931 | -36.09953 | 12 | 0.69444 | 36.794 | Apbb2                                         |
| chr15 | 100922241 | 100922470 | 0.0068931 | -35.92857 | 10 | 1       | 36.929 | Scn8a                                         |
| chr5  | 38310850  | 38311335  | 0.006893  | -35.7691  | 10 | 2.4306  | 38.2   |                                               |
| chr2  | 181649039 | 181649209 | 0.0068931 | -35.47023 | 10 | 0.71429 | 36.185 | Prpf6                                         |
| chr7  | 68193350  | 68193418  | 0.0068931 | -35.41666 | 10 | 1.25    | 36.667 | Igf1r                                         |
| chr9  | 62842017  | 62842239  | 0.0068931 | -35.33333 | 10 | 5       | 40.333 | Cln6 & Gm10653                                |
| chr7  | 58836972  | 58837062  | 0.0068931 | -35.23223 | 19 | 4.0925  | 39.325 | Gm6226                                        |
| chr6  | 87209796  | 87210416  | 0.0068931 | -34.96240 | 19 | 2.6316  | 37.594 | Antxr1                                        |
| chr7  | 131825767 | 131825899 | 0.0068931 | -34.76785 | 10 | 2.5     | 37.268 | Gm44546 & fibroblast growth factor receptor 2 |
| chr15 | 76305675  | 76305793  | 0.006893  | -34.6232  | 13 | 1.511   | 36.134 | Oplah                                         |
| chr9  | 119138162 | 119138246 | 0.0068931 | -34.37301 | 10 | 1.6667  | 36.04  | Dlec1                                         |
| chr11 | 99034080  | 99034234  | 0.006893  | -34.3367  | 14 | 7.7381  | 42.075 |                                               |
| chr4  | 45273996  | 45274360  | 0.0068931 | -34.23611 | 12 | 5.2083  | 39.444 | Frmpd1                                        |
| chr16 | 11492154  | 11492402  | 0.006893  | -34.0417  | 10 | 1.6667  | 35.708 | Snx29                                         |

|       |           |           |           |           |    |         |        |                                              |
|-------|-----------|-----------|-----------|-----------|----|---------|--------|----------------------------------------------|
| chr9  | 25688298  | 25688845  | 0.006893  | -33.9286  | 14 | 5.9524  | 39.881 |                                              |
| chr15 | 80967120  | 80967499  | 0.0068931 | -33.72023 | 14 | 0.89286 | 34.613 | Adsl                                         |
| chr19 | 6062718   | 6063045   | 0.0068931 | -33.57142 | 14 | 2.381   | 35.952 | Tm7sf2                                       |
| chr11 | 5717929   | 5718088   | 0.006893  | -33.0495  | 13 | 2.5641  | 35.614 | Urgcp                                        |
| chr7  | 25082087  | 25082304  | 0.0068931 | -32.80555 | 10 | 1.1111  | 33.917 | Zfp574                                       |
| chr15 | 8269674   | 8269813   | 0.006893  | -32.7202  | 10 | 0.625   | 33.345 | Cplane1                                      |
| chr11 | 97978523  | 97978714  | 0.006893  | -32.6938  | 13 | 0.641   | 33.335 | Plxdc1                                       |
| chr5  | 144209536 | 144209841 | 0.0068931 | -32.47023 | 12 | 4.8611  | 37.331 | Tecpr1                                       |
| chr9  | 111391476 | 111391689 | 0.0068931 | -32.42857 | 10 | 0.83333 | 33.262 | Trank1                                       |
| chr15 | 38663625  | 38664045  | 0.0068931 | -32.36706 | 10 | 1.8056  | 34.173 | Atp6v1c1                                     |
|       |           |           |           |           |    |         |        | Gm45894 & ankyrin repeat domain 11 & Gm20388 |
| chr8  | 122891727 | 122891876 | 0.0068931 | -32.34523 | 10 | 4.1071  | 36.452 |                                              |
| chr4  | 74864461  | 74864606  | 0.006893  | -32.2917  | 12 | 10.972  | 43.264 |                                              |
| chr6  | 71964875  | 71965058  | 0.0068931 | -32.28840 | 13 | 5.0366  | 37.325 | Polr1a                                       |
| chr19 | 25579953  | 25580353  | 0.0068931 | -32.27891 | 14 | 5.2296  | 37.509 | Dmrt1                                        |
| chr8  | 119749795 | 119750213 | 0.0068931 | -32.27678 | 12 | 0.59524 | 32.872 | Atp2c2                                       |
| chr4  | 118237905 | 118237953 | 0.0068931 | -32.10714 | 10 | 3.0952  | 35.202 | Ptprf                                        |
| chr13 | 53417981  | 53418380  | 0.0068931 | -32.10353 | 10 | 2.7778  | 34.881 | Gm2762                                       |
| chr9  | 119379660 | 119379947 | 0.0068931 | -31.86535 | 13 | 0.96154 | 32.827 | Xylb                                         |
| chr4  | 1.55E+08  | 1.55E+08  | 0.006893  | -31.587   | 10 | 1.25    | 32.837 |                                              |
| chr12 | 111192047 | 111192937 | 0.0068931 | -31.58333 | 10 | 1.6667  | 33.25  | Traf3                                        |
| chr4  | 1.17E+08  | 1.17E+08  | 0.006893  | -31.0785  | 14 | 4.4643  | 35.543 | Ptch2                                        |
| chr7  | 100938291 | 100938453 | 0.0068931 | -30.41514 | 13 | 3.2479  | 33.663 | P2ry6                                        |
| chr4  | 123189186 | 123189262 | 0.0068931 | -30.33163 | 14 | 4.2857  | 34.617 | Hpcal4                                       |
| chr5  | 65300627  | 65301109  | 0.0068931 | -30.05311 | 10 | 3.8526  | 33.906 | Rfc1                                         |
| chr2  | 92377518  | 92377701  | 0.0068931 | -29.97889 | 10 | 2.381   | 32.36  | Pex16                                        |
| chr14 | 57699764  | 57699829  | 0.0068931 | -29.96159 | 17 | 7.6857  | 37.647 | Lats2 & Gm49361                              |
| chr15 | 28123174  | 28123479  | 0.0068931 | -29.94709 | 12 | 3.5417  | 33.489 | Gm8472                                       |
| chr17 | 30874936  | 30875065  | 0.0068931 | -29.60151 | 13 | 3.6769  | 33.278 | Dnah8                                        |
| chr14 | 55862298  | 55862519  | 0.0068931 | -29.57936 | 10 | 1.6667  | 31.246 | Nynrin                                       |
| chr1  | 86427767  | 86428040  | 0.0068931 | -29.43027 | 14 | 5.7143  | 35.145 | Tex44                                        |
| chr4  | 47256583  | 47257884  | 0.0068931 | -29.30021 | 26 | 3.2051  | 32.505 | Col15a1                                      |
| chr11 | 1.17E+08  | 1.17E+08  | 0.006893  | -28.994   | 10 | 1.3393  | 30.333 |                                              |
| chr4  | 1.31E+08  | 1.31E+08  | 0.006893  | -28.9286  | 12 | 0.8333  | 29.762 |                                              |
| chr17 | 41195846  | 41196424  | 0.006893  | -28.7454  | 13 | 3.5256  | 32.271 |                                              |
| chr5  | 146210498 | 146210813 | 0.0068931 | -28.73051 | 10 | 1.8056  | 30.536 | Rnf6                                         |
| chr2  | 167977212 | 167977529 | 0.0068931 | -28.71794 | 13 | 4.6154  | 33.333 | Ptpn1                                        |
| chr2  | 170775688 | 170775912 | 0.0068931 | -28.63591 | 12 | 2.0238  | 30.66  | Dok5                                         |
| chr14 | 30031561  | 30031684  | 0.0068931 | -28.62044 | 17 | 1.9608  | 30.581 | Chdh                                         |
| chr13 | 114007294 | 114007539 | 0.0068931 | -28.57142 | 12 | 1.4286  | 30     | Arl15                                        |
| chr10 | 75739363  | 75739845  | 0.006893  | -28.3318  | 13 | 3.2051  | 31.537 | Cabin1                                       |
| chrX  | 38456303  | 38456412  | 0.0068931 | -28.26087 | 23 | 0.7971  | 29.058 | Lamp2                                        |
| chr5  | 125034344 | 125034489 | 0.0068931 | -28.15800 | 10 | 6.0152  | 34.173 | Ncor2                                        |
| chr17 | 56196540  | 56197383  | 0.0068931 | -28.14881 | 10 | 1.6667  | 29.815 | Dpp9                                         |
| chr6  | 87581612  | 87581737  | 0.0068931 | -27.84748 | 14 | 3.2738  | 31.121 | Prokr1                                       |
| chr11 | 3997374   | 3997468   | 0.0068931 | -27.77381 | 10 | 1.6667  | 29.44  | Gal3st1                                      |
| chrX  | 1.58E+08  | 1.58E+08  | 0.006893  | -27.114   | 11 | 4.5455  | 31.659 |                                              |
| chr17 | 25397298  | 25397418  | 0.0068931 | -26.86904 | 10 | 1.5476  | 28.417 | Cacna1h                                      |
| chr19 | 4731837   | 4731990   | 0.0068931 | -26.81405 | 14 | 0.89286 | 27.707 | Sptbn2                                       |
| chr18 | 80652727  | 80653223  | 0.0068931 | -26.72161 | 13 | 1.2821  | 28.004 | Nfatc1                                       |
| chr5  | 113751499 | 113751893 | 0.0068931 | -26.41963 | 12 | 2.1465  | 28.566 | Sart3                                        |
| chr16 | 33123593  | 33123826  | 0.0068931 | -25.60119 | 10 | 2.0833  | 27.685 | Lmln                                         |
| chr2  | 29404969  | 29405022  | 0.0068931 | -25.47619 | 10 | 2.5     | 27.976 | Med27                                        |
| chr1  | 134224985 | 134225457 | 0.0068931 | -25.46627 | 12 | 2.381   | 27.847 | Adora1                                       |
| chr5  | 122104992 | 122105336 | 0.0068931 | -25.45860 | 12 | 4.7851  | 30.244 | Myl2                                         |
| chr14 | 66301194  | 66301426  | 0.0068931 | -25.38551 | 10 | 1.6667  | 27.052 | Trim35                                       |

|       |           |           |           |           |    |         |        |                      |
|-------|-----------|-----------|-----------|-----------|----|---------|--------|----------------------|
| chr13 | 49078491  | 49079016  | 0.0068931 | -25.38095 | 10 | 7.5952  | 32.976 | Wnk2                 |
| chr11 | 87617162  | 87617319  | 0.006893  | -25.0157  | 19 | 3.5088  | 28.524 | Hsf5                 |
| chr5  | 124719056 | 124719199 | 0.0068931 | -24.99956 | 12 | 1.7361  | 26.736 | Atp6v0a2             |
| chr17 | 35015743  | 35015857  | 0.0068931 | -24.93882 | 12 | 1.0582  | 25.997 | Vars                 |
| chr19 | 3815142   | 3815359   | 0.0068931 | -24.89545 | 10 | 1.6783  | 26.574 | Kmt5b &<br>Gm16066   |
| chr11 | 69404711  | 69405016  | 0.0068931 | -24.66673 | 23 | 5.7189  | 30.386 | Kdm6b                |
| chr4  | 45772813  | 45773133  | 0.006893  | -24.5252  | 10 | 3.75    | 28.275 |                      |
| chr4  | 46576579  | 46576686  | 0.006893  | -24.4194  | 12 | 4.9242  | 29.344 | Coro2a               |
| chr17 | 34921586  | 34921830  | 0.0068931 | -24.36520 | 14 | 1.9674  | 26.333 | Slc44a4              |
| chr15 | 76180291  | 76180342  | 0.0068931 | -24.27910 | 12 | 5.9441  | 30.223 | Plec                 |
| chr14 | 34146544  | 34146623  | 0.006893  | -24.2222  | 10 | 1       | 25.222 | Npy4r                |
| chr11 | 55381204  | 55381907  | 0.006893  | -24.1494  | 23 | 4.4462  | 28.596 |                      |
| chr15 | 1.01E+08  | 1.01E+08  | 0.006893  | -23.4396  | 14 | 3.4226  | 26.862 | Gm35853              |
| chr11 | 5144321   | 5144495   | 0.006893  | -23.2352  | 13 | 3.9194  | 27.155 | Emid1                |
| chr4  | 1.15E+08  | 1.15E+08  | 0.006893  | -23.1981  | 14 | 1.7857  | 24.984 | Gm12833              |
| chr10 | 60406226  | 60406410  | 0.0068931 | -23.19480 | 10 | 3.3333  | 26.528 | Cdh23                |
| chr12 | 4210002   | 4210305   | 0.0068931 | -22.96131 | 12 | 4.1667  | 27.128 | Cenpo & Adcy3        |
| chr5  | 75655718  | 75655939  | 0.0068931 | -22.94455 | 13 | 2.8846  | 25.829 | Kit                  |
| chr8  | 110223241 | 110223560 | 0.0068931 | -22.79419 | 10 | 2.5     | 25.294 | Cmtr2                |
| chr4  | 153987815 | 153988022 | 0.0068931 | -22.20238 | 13 | 3.869   | 26.071 | Cep104               |
| chr11 | 82440462  | 82440587  | 0.0068931 | -21.70653 | 10 | 2.5     | 24.207 | Tmem132e             |
| chr11 | 100746174 | 100746273 | 0.0068931 | -21.46428 | 10 | 2.5     | 23.964 | Kcnh4                |
| chr2  | 1.68E+08  | 1.68E+08  | 0.006893  | -21.2628  | 14 | 3.5714  | 24.834 | Tmem189 &<br>Gm20431 |
| chr8  | 70220717  | 70220939  | 0.006893  | -20.5571  | 13 | 4.6154  | 25.172 | Armc6                |
| chr18 | 56761009  | 56761272  | 0.006893  | -20.013   | 13 | 0.7692  | 20.782 |                      |
| chr5  | 1.41E+08  | 1.41E+08  | 0.006893  | -19.8898  | 27 | 3.6596  | 23.549 |                      |
| chr15 | 76890817  | 76891191  | 0.0068931 | -19.80347 | 21 | 4.8507  | 24.654 | Zfp7 & Gm49527       |
| chr3  | 51001770  | 51002081  | 0.006893  | -19.7066  | 19 | 2.5877  | 22.294 |                      |
| chr17 | 87781845  | 87782408  | 0.006893  | -18.7286  | 13 | 3.1136  | 21.842 | Kcnk12               |
| chr3  | 1.23E+08  | 1.23E+08  | 0.006893  | -18.4112  | 13 | 3.8462  | 22.257 | Bcar3                |
| chr7  | 122595026 | 122595429 | 0.0068931 | -18.30357 | 12 | 9.7222  | 28.026 | Prkcb                |
| chr6  | 112564632 | 112564953 | 0.0068931 | -17.99843 | 12 | 1.9097  | 19.908 | Gm15519              |
| chr5  | 130000875 | 130001069 | 0.0068931 | -17.54578 | 13 | 0.76923 | 18.315 | Gusb                 |
| chr14 | 24477886  | 24478308  | 0.006893  | -17.4675  | 11 | 4.5455  | 22.013 | Polr3a               |
| chr8  | 70771938  | 70772135  | 0.0068931 | -16.64381 | 12 | 0.69444 | 17.338 | Pik3r2               |
| chr5  | 24325689  | 24325810  | 0.0068931 | -16.48562 | 14 | 0.29762 | 16.783 | Kcnh2                |
| chr11 | 5874179   | 5874526   | 0.0068931 | -16.30952 | 17 | 1.6457  | 17.955 | Pold2                |
| chr8  | 77447674  | 77447826  | 0.0068931 | -14.77514 | 12 | 2.3752  | 17.15  | Arhgap10             |
| chr17 | 25842377  | 25842462  | 0.0068931 | -14.47773 | 13 | 1.5797  | 16.057 | Rhot2 & Gm26694      |
| chr11 | 66217661  | 66217757  | 0.0068931 | -9.035534 | 10 | 2.9545  | 11.99  | Gm12296 &            |
| chr17 | 89091733  | 89091812  | 0.0069    | -40.7771  | 12 | 3.9335  | 44.711 | Fshr                 |
| chr4  | 1.56E+08  | 1.56E+08  | 0.0069    | -16.3872  | 12 | 1.5278  | 17.915 | Agrn                 |
| chr14 | 32836198  | 32836302  | 0.0069248 | -25.83874 | 11 | 0.90909 | 26.748 | Fam170b              |
| chr7  | 27529120  | 27529205  | 0.0069334 | -30.45454 | 11 | 1.2175  | 31.672 | Hipk4                |
| chr9  | 1.19E+08  | 1.19E+08  | 6.97E-03  | -33.7879  | 11 | 1.1364  | 34.924 | Itga9                |
| chr1  | 132360537 | 132360793 | 0.0069746 | -19.72234 | 24 | 4.2905  | 24.013 | Tmcc2                |
| chr1  | 1.87E+08  | 1.87E+08  | 0.00701   | -51.9426  | 11 | 2.5379  | 54.481 | Gpatch2              |
| chr12 | 1.03E+08  | 1.03E+08  | 0.007027  | -19.6429  | 11 | 5.4545  | 25.097 | Itpk1                |
| chr14 | 73025695  | 73025849  | 0.0070768 | -41.14583 | 16 | 0.52083 | 41.667 | Cysltr2              |
| chr8  | 121551897 | 121552154 | 0.0072987 | -27.14436 | 16 | 0.625   | 27.769 | Fbxo31 &<br>Gm20388  |
| chr4  | 1.45E+08  | 1.45E+08  | 0.007393  | -23.802   | 28 | 1.8197  | 25.622 | Dhrs3                |
| chr7  | 56690776  | 56691404  | 0.007488  | -48.7917  | 20 | 8.9167  | 57.708 |                      |

|       |           |           |           |           |    |         |        |                                                |
|-------|-----------|-----------|-----------|-----------|----|---------|--------|------------------------------------------------|
|       |           |           |           |           |    |         |        | Gm12940 & zinc finger, MYM domain containing 1 |
| chr4  | 127048471 | 127049109 | 0.0076594 | -27.77116 | 18 | 2.6455  | 30.417 |                                                |
| chr18 | 61206381  | 61207894  | 0.007736  | -26.6261  | 22 | 6.25    | 32.876 | Slc26a2                                        |
| chr11 | 1.16E+08  | 1.16E+08  | 0.007787  | -21.7673  | 18 | 0.9259  | 22.693 | Unk                                            |
| chr1  | 33681090  | 33681470  | 0.00796   | -24.6848  | 25 | 8.7819  | 33.467 |                                                |
| chr2  | 125740809 | 125740940 | 0.0079597 | -23.83157 | 18 | 0.46296 | 24.295 | Secisbp2l                                      |
| chr15 | 75710920  | 75711582  | 0.007997  | -22.59523 | 15 | 1.3095  | 23.905 | Rhpn1                                          |
| chr9  | 110627492 | 110627754 | 0.0080103 | -20.38690 | 18 | 1.3889  | 21.776 | Nbeal2                                         |
| chr4  | 1.46E+08  | 1.46E+08  | 0.00804   | -22.7636  | 18 | 0.6944  | 23.458 | Gm13226                                        |
| chr2  | 181236058 | 181236414 | 0.0080479 | -19.70189 | 23 | 2.6475  | 22.349 | Helz2                                          |
| chr11 | 67355948  | 67356088  | 0.008051  | -44.375   | 20 | 1       | 45.375 | Myh13                                          |
| chr2  | 1.75E+08  | 1.75E+08  | 0.008051  | -39.7244  | 18 | 1.8519  | 41.576 |                                                |
| chr17 | 25937051  | 25937415  | 0.008051  | -24.2293  | 18 | 5.2745  | 29.504 | Pigg & Gm26694                                 |
| chr11 | 109558764 | 109559603 | 0.0080506 | -22.83439 | 18 | 0.69444 | 23.529 | Arsg                                           |
| chr7  | 46544402  | 46544808  | 0.008051  | -22.8042  | 18 | 0.9259  | 23.73  | Sergef                                         |
| chr5  | 113753221 | 113753704 | 0.0080506 | -20.50721 | 18 | 1.5046  | 22.012 | Sart3                                          |
| chr1  | 1.36E+08  | 1.36E+08  | 0.008062  | -18.9291  | 23 | 10.87   | 29.799 | Inava                                          |
| chr11 | 69998394  | 69998737  | 0.0080677 | -25.78042 | 18 | 0.92593 | 26.706 | Phf23                                          |
| chr9  | 20928735  | 20929658  | 0.008526  | -25.2556  | 17 | 3.2633  | 28.519 | Dnmt1                                          |
| chr2  | 103691802 | 103692493 | 0.0093986 | -32.08916 | 17 | 0.74697 | 32.836 | Abtb2                                          |
|       |           |           |           |           |    |         |        | 6530413G14Rik & Acp5                           |
| chr9  | 22129936  | 22130226  | 0.0095946 | -23.27964 | 17 | 1.9608  | 25.24  |                                                |
| chr1  | 1.67E+08  | 1.67E+08  | 0.009618  | -31.2605  | 17 | 1.8908  | 33.151 | Fam78b                                         |
| chr2  | 32303651  | 32303839  | 0.0096481 | -23.69056 | 21 | 1.4021  | 25.093 | Golga2                                         |
| chr5  | 35129262  | 35129517  | 0.009762  | -22.8792  | 24 | 2.1712  | 25.05  |                                                |
| chr7  | 133020081 | 133020573 | 0.0097805 | -29.32773 | 17 | 0.58824 | 29.916 | Ctbp2 & Fgfr2                                  |
|       |           |           |           |           |    |         |        | Ppp2r5d & Gm26904                              |
| chr17 | 46685623  | 46686054  | 0.00989   | -30.7384  | 17 | 3.9706  | 34.709 |                                                |
| chr16 | 11029430  | 11030090  | 0.0099047 | -27.45639 | 17 | 2.556   | 30.012 | Litaf                                          |
| chr4  | 1.3E+08   | 1.3E+08   | 0.009937  | -21.7489  | 21 | 2.3413  | 24.09  | Col16a1                                        |
| chr19 | 43663691  | 43664197  | 0.010015  | -37.2024  | 14 | 1.9048  | 39.107 | Slc25a28                                       |
| chr2  | 29730581  | 29730887  | 0.010015  | -27.7991  | 19 | 2.7471  | 30.546 | Rapgef1                                        |
| chr6  | 48975493  | 48976334  | 0.010015  | -20.1853  | 21 | 6.1508  | 26.336 | Doxl2                                          |
|       |           |           |           |           |    |         |        | Rbm38 & Gm14453                                |
| chr2  | 173033589 | 173033813 | 0.010015  | -15.20647 | 17 | 4.1575  | 19.364 |                                                |
| chr4  | 99986684  | 99986868  | 0.010017  | -34.91496 | 14 | 3.4864  | 38.401 | Pgm1                                           |
| chr10 | 19818653  | 19819034  | 0.010017  | -30.3979  | 19 | 2.4635  | 32.861 |                                                |
| chr2  | 167978203 | 167978403 | 0.010017  | -24.64466 | 14 | 2.7056  | 27.35  | Ptpn1                                          |
| chr11 | 35888799  | 35889378  | 0.010017  | -23.76700 | 21 | 3.5544  | 27.321 | Wwc1                                           |
| chr12 | 76564317  | 76564540  | 0.010017  | -21.50178 | 19 | 3.3835  | 24.885 | Plekhg3                                        |
| chr17 | 15401717  | 15402090  | 0.01003   | -33.64229 | 21 | 7.1825  | 40.825 | Fam120b                                        |
| chr11 | 120009788 | 120010037 | 0.01003   | -18.85822 | 21 | 3.7103  | 22.569 | Aatk                                           |
| chr7  | 46285125  | 46285466  | 0.010087  | -31.53508 | 19 | 4.8246  | 36.36  | Otog                                           |
| chr11 | 65187444  | 65187531  | 0.010087  | -26.24578 | 17 | 5.4669  | 31.713 | Myocd                                          |
| chr15 | 76454060  | 76454200  | 0.010087  | -23.1271  | 17 | 4.0966  | 27.224 | Bop1                                           |
| chr8  | 1.07E+08  | 1.07E+08  | 0.010087  | -20.3245  | 17 | 1.4706  | 21.795 |                                                |
| chr16 | 34054688  | 34055075  | 0.010338  | -32.52377 | 19 | 3.1738  | 35.698 | Kalrn                                          |
| chr7  | 68165016  | 68165289  | 0.010459  | -13.12876 | 29 | 2.5287  | 15.657 | Igf1r                                          |
| chr16 | 25018505  | 25018662  | 0.010817  | -51.1992  | 16 | 20.312  | 71.512 |                                                |
| chr5  | 125052518 | 125052979 | 0.01092   | -24.12408 | 13 | 1.0029  | 25.127 | Ncor2                                          |
| chr6  | 84107315  | 84107618  | 0.010952  | -36.48663 | 13 | 2.1902  | 38.677 | Dysf                                           |
| chr11 | 118065658 | 118065917 | 0.011034  | -27.71329 | 16 | 6.9792  | 34.692 | Dnah17                                         |
| chr6  | 115980666 | 115980924 | 0.011284  | -19.37500 | 16 | 1.25    | 20.625 | Plxnd1                                         |
| chr8  | 71717171  | 71717272  | 0.011462  | -21.23321 | 13 | 3.3333  | 24.567 | Fcho1                                          |
| chr15 | 99243343  | 99243402  | 0.01152   | -29.71153 | 13 | 0.64103 | 30.353 | Mcrs1                                          |
| chr14 | 20712237  | 20712576  | 0.011798  | -17.22222 | 18 | 0.90278 | 18.125 | Zswim8                                         |

|       |           |           |          |           |    |         |        |                           |
|-------|-----------|-----------|----------|-----------|----|---------|--------|---------------------------|
| chr12 | 107917090 | 107917242 | 0.011801 | -22.95544 | 22 | 1.8669  | 24.822 | Bcl11b                    |
| chr8  | 80771107  | 80771615  | 0.011813 | -27.73809 | 18 | 3.0093  | 30.747 | Gm7997 & Gab1             |
| chr4  | 136007717 | 136007847 | 0.011881 | -46.71875 | 16 | 1.4062  | 48.125 | Eloa & Gm13008            |
| chr8  | 1.1E+08   | 1.1E+08   | 0.011881 | -18.5392  | 22 | 7.4838  | 26.023 | Hydin                     |
| chr13 | 51723074  | 51723839  | 0.011907 | -24.5313  | 16 | 0.4464  | 24.978 | Sema4d                    |
| chr2  | 30256020  | 30256123  | 0.011928 | -35.96974 | 16 | 3.0729  | 39.043 | Lrrc8a &                  |
| chr4  | 141871730 | 141872027 | 0.012111 | -20.06200 | 16 | 1.0417  | 21.104 | Efhd2                     |
| chr5  | 1.4E+08   | 1.4E+08   | 0.012128 | -35.2046  | 16 | 1.4621  | 36.667 | Micall2                   |
| chr3  | 1.42E+08  | 1.42E+08  | 0.01214  | -58.6111  | 12 | 1.3889  | 60     | Bmpr1b                    |
| chr7  | 98092513  | 98092679  | 0.012184 | -24.41592 | 16 | 1.6667  | 26.083 | Myo7a                     |
| chr11 | 6676510   | 6677015   | 0.012189 | -30.65152 | 16 | 3.8802  | 34.532 | Ramp3                     |
| chr2  | 1.06E+08  | 1.06E+08  | 0.012254 | -39.375   | 16 | 0.7813  | 40.156 | Pax6os1                   |
| chr7  | 111747478 | 111748530 | 0.012254 | -29.53373 | 16 | 0.78125 | 30.315 | Galnt18                   |
| chr2  | 168668936 | 168669518 | 0.012254 | -29.17162 | 16 | 2.691   | 31.863 | Atp9a                     |
| chr2  | 169720658 | 169721091 | 0.012254 | -28.37651 | 16 | 1.4052  | 29.782 | Tshz2 & Gm26883           |
| chr8  | 1.2E+08   | 1.2E+08   | 0.012254 | -28.3382  | 16 | 2.3935  | 30.732 | Adad2                     |
| chr11 | 1.01E+08  | 1.01E+08  | 0.012254 | -21.8447  | 20 | 5.5016  | 27.346 | Kat2a                     |
| chr12 | 1.09E+08  | 1.09E+08  | 0.012254 | -17.4869  | 16 | 0.3472  | 17.834 |                           |
| chr7  | 85285355  | 85285500  | 0.012259 | -36.7336  | 16 | 2.3438  | 39.077 |                           |
| chr15 | 83114761  | 83114992  | 0.012259 | -34.21255 | 16 | 5.0087  | 39.221 | Rrp7a & Serhl             |
| chr17 | 66432663  | 66433423  | 0.012261 | -30.94678 | 20 | 3.125   | 34.072 | Mtcl1                     |
| chr4  | 1.54E+08  | 1.54E+08  | 0.012261 | -26.5983  | 18 | 1.3845  | 27.983 | Wrap73                    |
| chr4  | 132127358 | 132127586 | 0.012261 | -21.90972 | 16 | 1.6667  | 23.576 | Oprd1                     |
| chr15 | 27748242  | 27748359  | 0.012287 | -31.131   | 12 | 5.625   | 36.756 | Trio                      |
| chr15 | 76012131  | 76012334  | 0.012342 | -30.41140 | 12 | 3.287   | 33.698 | Fam83h &<br>K230010J24Rik |
| chr7  | 6440142   | 6440204   | 0.012368 | -21.8634  | 12 | 0.9259  | 22.789 | Olfr1344 &<br>Gm20715     |
| chr7  | 7288895   | 7289397   | 0.012369 | -19.8468  | 20 | 4.8933  | 24.74  | Clcn4                     |
| chr10 | 61657243  | 61657992  | 0.012468 | -60.69444 | 15 | 5.8056  | 66.5   | Ppa1                      |
| chr4  | 94996762  | 94996937  | 0.012468 | -60.20238 | 10 | 8.75    | 68.952 | Gm12694                   |
| chr11 | 79191619  | 79192100  | 0.012468 | -59.0595  | 10 | 2.9643  | 62.024 |                           |
| chr15 | 100182461 | 100182596 | 0.012468 | -54.33605 | 10 | 2.5806  | 56.917 | Dip2b                     |
| chr7  | 49453152  | 49453430  | 0.012468 | -54.23611 | 10 | 9.1667  | 63.403 | Nav2                      |
| chr19 | 57639951  | 57640253  | 0.012468 | -52.58333 | 10 | 5.8333  | 58.417 | Atrnl1                    |
| chr19 | 24351413  | 24351734  | 0.012468 | -52.50595 | 10 | 1.3333  | 53.839 | Pip5k1b                   |
| chr4  | 120133517 | 120133677 | 0.012468 | -51.90488 | 10 | 4.8451  | 56.75  | Hivep3                    |
| chr3  | 91607029  | 91607209  | 0.012468 | -51.25    | 10 | 14.583  | 65.833 |                           |
| chr4  | 60183221  | 60183454  | 0.012468 | -49.7579  | 15 | 24.032  | 73.79  |                           |
| chr5  | 124794378 | 124794430 | 0.012468 | -46.91666 | 10 | 1.6667  | 48.583 | Dnah10                    |
| chr8  | 75001401  | 75001459  | 0.012468 | -45.01587 | 10 | 0.71429 | 45.73  | Hmgxb4                    |
| chr3  | 14098242  | 14098814  | 0.012468 | -44.43091 | 10 | 2.5     | 46.931 | Raly1                     |
| chr2  | 166077531 | 166077631 | 0.012468 | -43.91269 | 10 | 2       | 45.913 | Sulf2                     |
| chr4  | 1.35E+08  | 1.35E+08  | 0.012468 | -43.7864  | 18 | 8.6574  | 52.444 |                           |
| chr12 | 16730165  | 16730495  | 0.012468 | -43.4524  | 10 | 3.2143  | 46.667 | Greb1                     |
| chr12 | 91333967  | 91334056  | 0.012468 | -42.58712 | 10 | 0.45455 | 43.042 | Cep128                    |
| chr16 | 62317343  | 62317458  | 0.012468 | -42.0982  | 12 | 3.6111  | 45.709 |                           |
| chr5  | 112744491 | 112744699 | 0.012468 | -40.54166 | 10 | 1.875   | 42.417 | Myo18b                    |
| chr11 | 87871443  | 87871525  | 0.012468 | -40.16666 | 10 | 2.6667  | 42.833 | Epx                       |
| chr2  | 165796157 | 165796240 | 0.012468 | -39.72222 | 10 | 2.625   | 42.347 | Zmynd8                    |
| chr13 | 98239027  | 98239474  | 0.012468 | -39.5417  | 10 | 2.875   | 42.417 |                           |
| chr4  | 125698249 | 125698470 | 0.012468 | -39.27381 | 10 | 6.25    | 45.524 | Grik3                     |
| chr17 | 65548009  | 65548170  | 0.012468 | -37.75    | 10 | 1.6667  | 39.417 |                           |
| chr1  | 180403373 | 180403682 | 0.012468 | -37.24206 | 10 | 1.0556  | 38.298 | Itpkb                     |
| chr13 | 111756133 | 111756239 | 0.012468 | -37.21825 | 10 | 2.0556  | 39.274 | Map3k1                    |
| chr10 | 93846081  | 93846178  | 0.012468 | -37.09505 | 10 | 0.95455 | 38.05  | Usp44                     |
| chr14 | 72441256  | 72441514  | 0.012468 | -36.84325 | 10 | 2.5     | 39.343 | Gm9195                    |
| chr4  | 84275935  | 84276135  | 0.012468 | -36.75000 | 10 | 1.6667  | 38.417 | Bnc2                      |



|       |           |           |          |           |    |         |        |                  |
|-------|-----------|-----------|----------|-----------|----|---------|--------|------------------|
| chr7  | 144508144 | 144508214 | 0.012468 | -36.73611 | 12 | 10.417  | 47.153 | Ppfia1           |
| chr11 | 116973356 | 116973479 | 0.012468 | -36.14352 | 10 | 1.7143  | 37.858 | Mgat5b           |
| chr10 | 81308485  | 81308635  | 0.012468 | -35.7401  | 10 | 9.875   | 45.615 | Pip5k1c          |
| chr4  | 139444528 | 139444677 | 0.012468 | -35.40476 | 10 | 0.71429 | 36.119 | Ubr4             |
| chr6  | 1.14E+08  | 1.14E+08  | 0.012468 | -35.0813  | 10 | 0.7143  | 35.796 |                  |
| chrX  | 1.6E+08   | 1.6E+08   | 0.012468 | -34.8333  | 10 | 4.0833  | 38.917 |                  |
| chr15 | 82005451  | 82005827  | 0.012468 | -34.79166 | 10 | 3       | 37.792 | Xrcc6 & Desi1    |
| chr2  | 32677898  | 32678429  | 0.012468 | -34.74206 | 18 | 2.3413  | 37.083 | Eng              |
| chr15 | 99626443  | 99626540  | 0.012468 | -34.59490 | 12 | 5.0463  | 39.641 | Racgap1          |
| chr18 | 64505174  | 64505294  | 0.012468 | -34.36904 | 10 | 5.5833  | 39.952 | Nars             |
| chr2  | 118696631 | 118696739 | 0.012468 | -34.30952 | 10 | 2.381   | 36.69  | Pak6             |
| chr15 | 89100657  | 89100903  | 0.012468 | -33.47222 | 15 | 1.5595  | 35.032 | Tubgcp6          |
| chr7  | 67669631  | 67669831  | 0.012468 | -32.9524  | 10 | 5       | 37.952 | Ttc23            |
| chr5  | 32143811  | 32144155  | 0.012468 | -32.67361 | 12 | 8.8542  | 41.528 | Fosl2            |
| chr4  | 129992669 | 129992828 | 0.012468 | -32.18055 | 10 | 3.6667  | 35.847 | Adgrb2           |
| chr8  | 1.18E+08  | 1.18E+08  | 0.012468 | -31.5987  | 20 | 8.1483  | 39.747 | Mphosph6         |
| chr6  | 15527568  | 15527759  | 0.012468 | -31.5913  | 10 | 5.3452  | 36.937 |                  |
| chr4  | 1.32E+08  | 1.32E+08  | 0.012468 | -31.3095  | 10 | 1.6667  | 32.976 |                  |
| chr2  | 1.04E+08  | 1.04E+08  | 0.012468 | -31.2626  | 10 | 1.0714  | 32.334 | D430041D05Rik    |
| chr13 | 60667743  | 60668353  | 0.012468 | -30.84505 | 12 | 3.3333  | 34.178 | Dapk1            |
| chr2  | 1.19E+08  | 1.19E+08  | 0.012468 | -30.6944  | 10 | 2.5     | 33.194 | Ankrd63          |
| chr7  | 16134113  | 16134288  | 0.012468 | -30.6131  | 10 | 4.9702  | 35.583 | Slc8a2           |
| chr1  | 135847795 | 135847950 | 0.012468 | -30.56222 | 10 | 3.7679  | 34.33  | Tnnt2            |
| chr1  | 36520009  | 36520107  | 0.012468 | -29.75    | 10 | 10.583  | 40.333 | Cnm3             |
| chr13 | 30827839  | 30828301  | 0.012468 | -29.62500 | 10 | 1.6667  | 31.292 | Exoc2            |
| chr8  | 1.24E+08  | 1.24E+08  | 0.012468 | -29.0833  | 10 | 2.4286  | 31.512 |                  |
| chr17 | 83795268  | 83795365  | 0.012468 | -29.03846 | 26 | 1.2821  | 30.321 | Mta3             |
| chr9  | 18427337  | 18427535  | 0.012468 | -28.9286  | 10 | 3.5     | 32.429 |                  |
| chr5  | 105479987 | 105480120 | 0.012468 | -28.81710 | 10 | 7.6234  | 36.44  | Lrrc8b           |
| chr15 | 97869584  | 97869679  | 0.012468 | -28.76426 | 11 | 9.0929  | 37.857 | Vdr              |
| chr7  | 132788913 | 132789060 | 0.012468 | -28.55158 | 10 | 2.6667  | 31.218 | Fam53b & Fgfr2   |
| chr4  | 1.55E+08  | 1.55E+08  | 0.012468 | -28.3623  | 12 | 2.2321  | 30.594 | Ski              |
| chr17 | 56396511  | 56396917  | 0.012468 | -28.01713 | 20 | 5.0487  | 33.066 | Kdm4b            |
| chr4  | 125055141 | 125055340 | 0.012468 | -27.87301 | 10 | 0.71429 | 28.587 | Dnali1 & Gnl2    |
| chr7  | 12971414  | 12971464  | 0.012468 | -27.52420 | 12 | 4.5718  | 32.096 | Zfp324           |
| chr5  | 120553676 | 120553909 | 0.012468 | -27.36488 | 11 | 0.75758 | 28.122 | Tpcn1            |
| chr9  | 1.09E+08  | 1.09E+08  | 0.012468 | -27.3552  | 10 | 2.4583  | 29.813 | Atrip            |
| chr17 | 56421952  | 56422239  | 0.012468 | -27.0618  | 15 | 4.4726  | 31.534 | Ptprs            |
| chr11 | 116037322 | 116037937 | 0.012468 | -26.99062 | 10 | 2.6667  | 29.657 | Unk              |
| chr2  | 29650907  | 29651466  | 0.012468 | -26.87301 | 10 | 0.55556 | 27.429 | Rapgef1          |
| chr1  | 1.81E+08  | 1.81E+08  | 0.012468 | -26.8611  | 10 | 1.6667  | 28.528 |                  |
| chr7  | 1.41E+08  | 1.41E+08  | 0.012468 | -26.6984  | 10 | 1.9643  | 28.663 | Pkp3             |
| chr17 | 32133419  | 32133562  | 0.012468 | -26.5642  | 23 | 2.4094  | 28.974 | Gm17276 & Notch3 |
| chr7  | 44899866  | 44900201  | 0.012468 | -26.54777 | 10 | 1.1806  | 27.728 | Fuz              |
| chr12 | 7977337   | 7977699   | 0.012468 | -26.02381 | 15 | 2.2619  | 28.286 | Apob             |
| chr13 | 55967408  | 55968183  | 0.012468 | -25.7402  | 23 | 1.8116  | 27.552 |                  |
| chr1  | 90275454  | 90276062  | 0.012468 | -25.631   | 10 | 1.6667  | 27.298 |                  |
| chr19 | 5869512   | 5869623   | 0.012468 | -24.7976  | 10 | 0.625   | 25.423 | Frmd8            |
| chr17 | 29339397  | 29339970  | 0.012468 | -24.32181 | 23 | 0.36232 | 24.684 | Mtch1            |
| chr19 | 23975507  | 23975574  | 0.012468 | -23.92124 | 10 | 2.4359  | 26.357 | Fam189a2         |
| chr19 | 6577441   | 6577956   | 0.012468 | -23.5948  | 10 | 5.1774  | 28.772 |                  |
| chr5  | 1.41E+08  | 1.41E+08  | 0.012468 | -23.5819  | 10 | 5.7143  | 29.296 | Ttyh3            |
| chr5  | 37104663  | 37104819  | 0.012468 | -23.44282 | 10 | 2       | 25.443 | Jakmip1 & Gm1043 |
| chr4  | 148886632 | 148887017 | 0.012468 | -22.89881 | 10 | 0.5     | 23.399 | Casz1            |
| chr5  | 30593462  | 30593816  | 0.012468 | -21.2719  | 20 | 1.25    | 22.522 | Kcnk3            |
| chr17 | 64137557  | 64138239  | 0.012468 | -21.24084 | 26 | 9.2949  | 30.536 | Fer              |

|       |           |           |          |           |    |         |        |                            |
|-------|-----------|-----------|----------|-----------|----|---------|--------|----------------------------|
| chr3  | 1.21E+08  | 1.21E+08  | 0.012468 | -21.0532  | 12 | 0.463   | 21.516 | Tmem56                     |
| chr9  | 106237980 | 10623820  | 0.012468 | -20.82720 | 10 | 6.4585  | 27.286 | Alas1                      |
| chr4  | 148051994 | 148052367 | 0.012468 | -20.21031 | 10 | 6.5833  | 26.794 | Mthfr                      |
| chr15 | 76059285  | 76059575  | 0.012468 | -19.23214 | 10 | 3.3333  | 22.565 | Scrib                      |
| chr11 | 103799816 | 103800014 | 0.012468 | -18.82280 | 10 | 2.0556  | 20.878 | Wnt3                       |
| chr7  | 44268329  | 44268409  | 0.012468 | -18.78445 | 10 | 3       | 21.784 | Gm18905                    |
| chr2  | 119293747 | 119293849 | 0.012468 | -17.85218 | 12 | 2.3282  | 20.18  | Vps18                      |
| chr5  | 124121392 | 124121539 | 0.012468 | -17.75649 | 26 | 3.0357  | 20.792 | Pitpnm2                    |
| chr1  | 85906439  | 85906563  | 0.012468 | -17.3373  | 10 | 1.5556  | 18.893 | Itm2c                      |
| chr11 | 1.03E+08  | 1.03E+08  | 0.012468 | -15.8304  | 26 | 1.6026  | 17.433 | Plcd3                      |
| chr14 | 52006572  | 52006769  | 0.012468 | -13.87509 | 20 | 6.4444  | 20.32  | Zfp219                     |
| chr16 | 33158019  | 33158472  | 0.012517 | -31.6779  | 23 | 6.2319  | 37.91  |                            |
| chr2  | 1.65E+08  | 1.65E+08  | 0.012547 | -27.9862  | 15 | 8.3333  | 36.32  | Elmo2                      |
| chr2  | 1.05E+08  | 1.05E+08  | 0.012547 | -23.2685  | 15 | 1.6667  | 24.935 |                            |
| chr6  | 125599894 | 125600116 | 0.012701 | -23.05158 | 15 | 1.9167  | 24.968 | Vwf                        |
| chr19 | 43795712  | 43796286  | 0.012814 | -29.9246  | 15 | 2.2222  | 32.147 | Abcc2                      |
| chr4  | 134906266 | 134906721 | 0.012848 | -48.02777 | 15 | 5       | 53.028 | Tmem50a                    |
| chr2  | 17722831  | 17723553  | 0.012848 | -38.29365 | 15 | 3.9444  | 42.238 | Nabl                       |
| chr5  | 102040156 | 102040348 | 0.012848 | -23.66426 | 15 | 1.6667  | 25.331 | Wdfy3                      |
| chr10 | 75352677  | 75352785  | 0.013078 | -40.40476 | 15 | 2.2222  | 42.627 | Gm5779 & Gucd1             |
| chr13 | 99228898  | 99229041  | 0.013078 | -15.91783 | 15 | 3.8014  | 19.719 | Zfp366                     |
| chr18 | 52796483  | 52797363  | 0.013173 | -29.67460 | 15 | 1.9444  | 31.619 | Sncaip                     |
| chr8  | 70770809  | 70771132  | 0.013173 | -22.6349  | 15 | 5.8333  | 28.468 | Pik3r2                     |
| chr1  | 1.8E+08   | 1.8E+08   | 0.013189 | -20.9352  | 15 | 0.6667  | 21.602 | Stum                       |
| chr11 | 1.21E+08  | 1.21E+08  | 0.013236 | -35.3333  | 15 | 1.6667  | 37     | Gcgr                       |
| chr17 | 46070927  | 46071454  | 0.013236 | -34.97474 | 15 | 2.5253  | 37.5   | AC110562.2                 |
| chr8  | 119601583 | 119601661 | 0.013236 | -30.61111 | 15 | 1.0833  | 31.694 | Taf1c                      |
| chr11 | 79045015  | 79045285  | 0.013236 | -26.96222 | 21 | 3.514   | 30.476 | Ksr1                       |
| chr1  | 1.83E+08  | 1.83E+08  | 0.013237 | -20.5257  | 15 | 3.3333  | 23.859 | Disp1                      |
| chr5  | 111183053 | 111183140 | 0.013242 | -20.26972 | 15 | 0.55556 | 20.825 | Ttc28                      |
| chr7  | 28023154  | 28023620  | 0.013267 | -49.3056  | 15 | 15.833  | 65.139 |                            |
| chr17 | 75737885  | 75738412  | 0.013267 | -27.8059  | 15 | 1.9444  | 29.75  |                            |
| chr7  | 35612411  | 35612680  | 0.013267 | -20.88912 | 15 | 3.4444  | 24.334 | Ankrd27                    |
| chr2  | 1.59E+08  | 1.59E+08  | 0.013267 | -18.8333  | 15 | 2.7778  | 21.611 |                            |
| chr8  | 8711586   | 8711682   | 0.013481 | -27.10084 | 17 | 3.5784  | 30.679 | Gm18393                    |
| chr7  | 44884548  | 44884886  | 0.013483 | -49.44727 | 14 | 3.1888  | 52.636 | Med25                      |
| chr4  | 1.36E+08  | 1.36E+08  | 0.01401  | -29.8479  | 24 | 7.662   | 37.51  |                            |
| chr15 | 81783073  | 81783308  | 0.01401  | -18.4215  | 19 | 4.1145  | 22.536 | Zc3h7b                     |
| chr8  | 123407927 | 123408023 | 0.014077 | -25.08053 | 17 | 1.7157  | 26.796 | Mc1r & Gm20388             |
| chr3  | 121354323 | 121354962 | 0.014155 | -26.86716 | 19 | 0.96491 | 27.832 | Alg14                      |
| chr6  | 86085957  | 86086431  | 0.014254 | -28.3473  | 17 | 4.3417  | 32.689 | Gm44089 & adducin 2 (beta) |
| chr16 | 35651568  | 35651669  | 0.014299 | -20.74859 | 19 | 1.8203  | 22.569 | Sema5b                     |
| chr17 | 34718663  | 34719234  | 0.01433  | -18.2784  | 35 | 2.424   | 20.702 | Tnxb                       |
| chr8  | 122747338 | 122747587 | 0.014363 | -27.52976 | 14 | 2.0833  | 29.613 | C230057M02Rik & Gm20388    |
| chr11 | 69650268  | 69650780  | 0.014478 | -39.80310 | 19 | 1.7544  | 41.557 | Fxr2                       |
| chr8  | 83934397  | 83934792  | 0.014504 | -28.46938 | 14 | 4.3155  | 32.785 | Adgrl1 & Gm10644           |
| chr7  | 24912751  | 24913490  | 0.01454  | -28.76096 | 19 | 3.7385  | 32.499 | Arhgef1                    |
| chr5  | 36909560  | 36909770  | 0.01454  | -18.22896 | 19 | 2.0175  | 20.247 | Ppp2r2c                    |
| chr10 | 43576338  | 43576699  | 0.014562 | -32.675   | 19 | 0.8772  | 33.552 |                            |
| chr15 | 94324456  | 94324846  | 0.014562 | -29.78075 | 17 | 10.839  | 40.62  | Adamts20                   |
| chr4  | 62498911  | 62499418  | 0.014562 | -19.0764  | 19 | 4.7382  | 23.815 | Hdhd3                      |
| chr10 | 77937723  | 77937867  | 0.014657 | -31.5056  | 17 | 5.5182  | 37.024 | Trpm2                      |
| chr17 | 48786326  | 48786453  | 0.014663 | -30.2089  | 17 | 3.0042  | 33.213 |                            |
| chr7  | 24994592  | 24994716  | 0.014663 | -25.77066 | 17 | 4.7335  | 30.504 | Atp1a3                     |
| chr10 | 59894334  | 59894406  | 0.014674 | -28.5598  | 17 | 10.131  | 38.69  | Dnajb12                    |

|       |           |           |          |           |    |         |        |                                                                                                   |
|-------|-----------|-----------|----------|-----------|----|---------|--------|---------------------------------------------------------------------------------------------------|
| chr9  | 21832031  | 21832650  | 0.014754 | -38.4792  | 17 | 3.9216  | 42.401 | Dock6                                                                                             |
| chr7  | 35658186  | 35658703  | 0.014777 | -22.3016  | 14 | 1.3039  | 23.605 |                                                                                                   |
| chr9  | 113981405 | 113981696 | 0.014786 | -26.41812 | 19 | 3.1433  | 29.561 | Fbxl2                                                                                             |
| chr7  | 112353888 | 112354111 | 0.014786 | -20.91184 | 19 | 0.87719 | 21.789 | Mical2                                                                                            |
|       |           |           |          |           |    |         |        | Gm20412 & transglutaminase 2, C polypeptide & regulation of nuclear pre-mRNA domain containing 1B |
| chr2  | 1.58E+08  | 1.58E+08  | 0.014786 | -20.1422  | 19 | 8.4503  | 28.593 |                                                                                                   |
| chr16 | 18223665  | 18224286  | 0.014786 | -19.32036 | 19 | 6.5205  | 25.841 | Zdhhc8                                                                                            |
| chr1  | 89624674  | 89625170  | 0.015207 | -22.79942 | 14 | 0.99206 | 23.791 | Agap1                                                                                             |
| chr4  | 56856695  | 56857191  | 0.015305 | -34.91431 | 14 | 3.5714  | 38.486 | Ctnna1                                                                                            |
| chr3  | 97591430  | 97592269  | 0.015348 | -43.86904 | 14 | 0.89286 | 44.762 | Chd1l                                                                                             |
| chr2  | 4891692   | 4891799   | 0.015355 | -40.77381 | 14 | 3.5714  | 44.345 | Sephs1                                                                                            |
| chr13 | 52757027  | 52757704  | 0.015355 | -39.1667  | 14 | 4.5833  | 43.75  | BB123696                                                                                          |
| chr16 | 31892513  | 31892632  | 0.015355 | -36.59863 | 14 | 5.4762  | 42.075 | Meltf                                                                                             |
| chr6  | 122696063 | 122696207 | 0.015355 | -17.32142 | 14 | 1.7857  | 19.107 | Gm10420                                                                                           |
| chr12 | 33249224  | 33249311  | 0.015361 | -30.2126  | 14 | 1.7857  | 31.998 | Atxn7l1                                                                                           |
| chr7  | 45817874  | 45818209  | 0.015361 | -28.35884 | 14 | 3.5714  | 31.93  | Kcnj14                                                                                            |
| chr4  | 1.37E+08  | 1.37E+08  | 0.015361 | -26.0649  | 14 | 0.8929  | 26.958 |                                                                                                   |
| chr7  | 30584067  | 30584523  | 0.015361 | -23.72449 | 14 | 3.5714  | 27.296 | Kmt2b                                                                                             |
| chr17 | 28857384  | 28857656  | 0.015367 | -22.93650 | 14 | 2.4235  | 25.36  | Pnpla1os                                                                                          |
| chr15 | 102188210 | 102188359 | 0.01537  | -17.68617 | 14 | 0.71429 | 18.4   | Csad                                                                                              |
| chr7  | 135269481 | 135270076 | 0.015431 | -44.70238 | 14 | 1.7857  | 46.488 | Nps                                                                                               |
| chr2  | 140073375 | 140073832 | 0.015431 | -19.49263 | 14 | 0.59524 | 20.088 | Rps19-ps7                                                                                         |
| chr18 | 65991550  | 65991851  | 0.015434 | -33.47222 | 14 | 2.7126  | 36.185 | Lman1                                                                                             |
| chr3  | 1.33E+08  | 1.33E+08  | 0.015456 | -35.7924  | 14 | 1.4286  | 37.221 | Tet2                                                                                              |
| chr12 | 112600026 | 112600102 | 0.015488 | -31.17205 | 14 | 0.5102  | 31.682 | Inf2                                                                                              |
| chr18 | 36028601  | 36028824  | 0.015488 | -25.51767 | 14 | 1.9048  | 27.422 | Nrg2                                                                                              |
| chr17 | 25719195  | 25719375  | 0.015492 | -34.07467 | 14 | 1.1905  | 35.265 | Gng13 & Chtf18                                                                                    |
| chr7  | 126160487 | 126160969 | 0.015502 | -36.32227 | 14 | 2.619   | 38.941 | Xpo6                                                                                              |
| chr11 | 28339621  | 28339867  | 0.015563 | -55.4762  | 14 | 8.8095  | 64.286 | Gm6685                                                                                            |
| chr8  | 95842385  | 95842873  | 0.015576 | -23.79960 | 14 | 1.1905  | 24.99  | Slc38a7                                                                                           |
| chr1  | 34200903  | 34201148  | 0.015624 | -27.69444 | 25 | 4.6548  | 32.349 | Dst                                                                                               |
| chr17 | 14680962  | 14681412  | 0.016149 | -28.8766  | 22 | 3.1025  | 31.979 | Thbs2                                                                                             |
| chr11 | 61384138  | 61384615  | 0.0167   | -28.2051  | 13 | 1.0989  | 29.304 |                                                                                                   |
| chr11 | 57709535  | 57709783  | 0.016706 | -25.76007 | 13 | 2.8388  | 28.599 | Galnt10                                                                                           |
| chr15 | 74370013  | 74370465  | 0.01676  | -25.3938  | 13 | 2.8846  | 28.278 |                                                                                                   |
| chr15 | 76174498  | 76174593  | 0.016865 | -31.22767 | 16 | 1.9531  | 33.181 | Plec                                                                                              |
| chr10 | 67571500  | 67571610  | 0.017171 | -45.641   | 13 | 1.9231  | 47.564 | 4930563J15Rik                                                                                     |
| chr15 | 83867038  | 83867208  | 0.01737  | -32.1474  | 13 | 1.2821  | 33.429 | Efcab6                                                                                            |
| chr1  | 43553923  | 43554145  | 0.017383 | -21.73000 | 26 | 1.3462  | 23.076 | Nck2                                                                                              |
| chr6  | 83299335  | 83299961  | 0.017393 | -25.4711  | 27 | 1.7996  | 27.271 | Slc4a5                                                                                            |
| chr10 | 76436508  | 76436623  | 0.017411 | -14.56101 | 16 | 0.39062 | 14.952 | Pcnt                                                                                              |
| chr2  | 150815318 | 150815687 | 0.017477 | -32.88461 | 13 | 1.9231  | 34.808 | Pygb                                                                                              |
| chr16 | 93754117  | 93754619  | 0.017477 | -25.89    | 20 | 2.2778  | 28.168 | Dop1b                                                                                             |
| chr14 | 54664389  | 54664529  | 0.017563 | -44.08068 | 18 | 0.69444 | 44.775 | Acin1                                                                                             |
| chr13 | 48928436  | 48928825  | 0.017565 | -52.2329  | 13 | 2.0604  | 54.293 | Fam120a                                                                                           |
| chr11 | 99348872  | 99348980  | 0.017605 | -47.96703 | 13 | 3.8462  | 51.813 | Krt27                                                                                             |
| chr6  | 34755641  | 34755881  | 0.017605 | -23.7197  | 16 | 5.625   | 29.345 | Cald1                                                                                             |
| chr15 | 81851410  | 81851629  | 0.017605 | -20.76637 | 13 | 3.5343  | 24.301 | Tob2                                                                                              |
| chr6  | 29456324  | 29456376  | 0.017605 | -20.3939  | 13 | 2.9487  | 23.343 | Finc                                                                                              |
| chr12 | 73351791  | 73351867  | 0.017608 | -48.30586 | 13 | 1.2821  | 49.588 | Slc38a6                                                                                           |
| chr9  | 99067661  | 99068084  | 0.017608 | -44.70696 | 13 | 1.9231  | 46.63  | Pik3cb                                                                                            |
| chr2  | 31598430  | 31598726  | 0.017608 | -44.09340 | 13 | 2.8846  | 46.978 | Fubp3                                                                                             |
| chr8  | 125238171 | 125238986 | 0.017608 | -41.70787 | 13 | 0.76923 | 42.477 | Disc1                                                                                             |

|       |           |           |          |           |    |         |        |                                                 |
|-------|-----------|-----------|----------|-----------|----|---------|--------|-------------------------------------------------|
| chr10 | 68000221  | 68000412  | 0.017608 | -37.50915 | 13 | 1.7308  | 39.24  | Rtkn2                                           |
| chr5  | 30893006  | 30893107  | 0.017608 | -36.67665 | 13 | 5.2506  | 41.927 | Agbl5                                           |
| chr17 | 35141519  | 35141895  | 0.017608 | -33.92747 | 16 | 4.367   | 38.294 | Bag6                                            |
| chr10 | 38918657  | 38919392  | 0.017608 | -32.6978  | 18 | 6.9444  | 39.642 |                                                 |
| chr11 | 87771357  | 87771768  | 0.017608 | -32.44352 | 13 | 0.76923 | 33.213 | Tspoap1                                         |
| chr5  | 121426139 | 121426910 | 0.017608 | -30.63864 | 16 | 3.4375  | 34.076 | Naa25                                           |
| chr6  | 5423649   | 5423848   | 0.017608 | -30.21062 | 13 | 1.2821  | 31.493 | Asb4                                            |
| chr10 | 117215180 | 117215577 | 0.017608 | -30.12820 | 13 | 0.96154 | 31.09  | Yeats4                                          |
| chr15 | 1.02E+08  | 1.02E+08  | 0.017608 | -28.9713  | 13 | 0.9615  | 29.933 | Krt1                                            |
| chr4  | 142104779 | 142104909 | 0.017608 | -28.27075 | 13 | 1.8681  | 30.139 | Kazn                                            |
| chrX  | 1.02E+08  | 1.02E+08  | 0.017608 | -28.1512  | 13 | 0.9615  | 29.113 |                                                 |
| chr19 | 6504939   | 6505009   | 0.017608 | -27.92124 | 13 | 8.4066  | 36.328 | Nrxn2                                           |
| chr2  | 31800232  | 31800359  | 0.017608 | -27.79068 | 13 | 2.3077  | 30.098 | Abl1                                            |
| chr18 | 4672924   | 4673968   | 0.017608 | -27.74206 | 20 | 5.5278  | 33.27  | Jcad                                            |
| chr15 | 36491420  | 36491685  | 0.017608 | -26.859   | 13 | 3.4615  | 30.321 | Ankrd46                                         |
| chr12 | 91675176  | 91675400  | 0.017608 | -26.0043  | 13 | 1.3355  | 27.34  | Gm8378 & Ston2                                  |
| chr5  | 144877877 | 144878349 | 0.017608 | -25.90201 | 13 | 3.8462  | 29.748 | Smurf1                                          |
| chr5  | 74959230  | 74959614  | 0.017608 | -24.93589 | 13 | 1.2821  | 26.218 | Gm6116                                          |
| chr11 | 97695544  | 97695581  | 0.017608 | -24.65812 | 13 | 3.8462  | 28.504 | Pcgf2                                           |
| chr15 | 84288276  | 84288827  | 0.017608 | -24.45054 | 13 | 0.6993  | 25.15  | Parvb                                           |
| chr15 | 11387655  | 11387810  | 0.017608 | -24.20787 | 13 | 1.9231  | 26.131 | Tars                                            |
| chr4  | 1.29E+08  | 1.29E+08  | 0.017608 | -23.931   | 18 | 1.702   | 25.633 | A3galt2                                         |
| chr11 | 53535776  | 53535929  | 0.017608 | -23.50274 | 13 | 2.5641  | 26.067 | Sept8                                           |
| chr5  | 112290120 | 112290604 | 0.017608 | -23.43025 | 13 | 0.96154 | 24.392 | Tpst2                                           |
| chr8  | 3458863   | 3459644   | 0.017608 | -23.05860 | 13 | 3.2051  | 26.264 | Pex11g & Gm44775                                |
| chr8  | 1.24E+08  | 1.24E+08  | 0.017608 | -22.9088  | 13 | 3.9044  | 26.813 | Gm20388                                         |
| chr4  | 141474570 | 141474723 | 0.017608 | -22.81746 | 13 | 2.5641  | 25.382 | Spen                                            |
| chr14 | 25746241  | 25746773  | 0.017608 | -22.27075 | 13 | 1.511   | 23.782 | Zcchc24                                         |
| chr8  | 1.2E+08   | 1.2E+08   | 0.017608 | -22.1245  | 13 | 0.8547  | 22.979 | Gm20388                                         |
| chr9  | 121470974 | 121471550 | 0.017608 | -21.44230 | 13 | 0.96154 | 22.404 | Trak1                                           |
| chr19 | 4108767   | 4109119   | 0.017608 | -21.0943  | 13 | 2.381   | 23.475 | Pitpnm1                                         |
| chr2  | 1.57E+08  | 1.57E+08  | 0.017608 | -20.0366  | 13 | 0.641   | 20.678 | Epb4111                                         |
| chr4  | 156217488 | 156217588 | 0.017608 | -18.76526 | 13 | 0.76923 | 19.534 | Perm1                                           |
| chr14 | 55098978  | 55099226  | 0.017608 | -18.70659 | 16 | 1.4757  | 20.182 | Thtpa & Gm20687 & Ap1g2                         |
| chr7  | 24922872  | 24923006  | 0.017608 | -18.24505 | 16 | 0.97222 | 19.217 | Arhgef1                                         |
| chr2  | 167105590 | 167105720 | 0.017608 | -17.68467 | 13 | 1.2821  | 18.967 | Kcnb1                                           |
| chr19 | 6320358   | 6320447   | 0.017608 | -16.5526  | 13 | 2.0513  | 18.604 | Cdc42bpg                                        |
| chr7  | 73310612  | 73310925  | 0.017608 | -16.1645  | 13 | 0.9615  | 17.126 | 4930429H19Rik                                   |
| chr15 | 96733105  | 96734194  | 0.017648 | -20.9067  | 23 | 5.3442  | 26.251 |                                                 |
| chr4  | 11491900  | 11492622  | 0.017708 | -27.48536 | 18 | 1.7361  | 29.221 | Virma                                           |
| chr7  | 1.27E+08  | 1.27E+08  | 0.017709 | -35.2778  | 18 | 4.8611  | 40.139 |                                                 |
| chr13 | 47471727  | 47472074  | 0.017709 | -24.9074  | 18 | 3.287   | 28.194 |                                                 |
| chr4  | 1.23E+08  | 1.23E+08  | 0.017719 | -41.5278  | 18 | 2.7778  | 44.306 |                                                 |
| chr1  | 91353906  | 91354044  | 0.017763 | -16.95071 | 23 | 7.9296  | 24.88  | Klhl30                                          |
| chr8  | 121357855 | 121358450 | 0.017837 | -34.32429 | 18 | 6.4815  | 40.806 | Gm20388                                         |
| chr8  | 94889284  | 94889530  | 0.017837 | -32.6918  | 18 | 3.502   | 36.194 |                                                 |
| chr5  | 73403388  | 73403671  | 0.01791  | -30.1499  | 18 | 3.2407  | 33.391 |                                                 |
| chr2  | 1.3E+08   | 1.3E+08   | 0.01792  | -66.9444  | 10 | 15.556  | 82.5   | Ebf4                                            |
| chr1  | 82496968  | 82497220  | 0.01792  | -66.38888 | 15 | 4.7222  | 71.111 | Col4a4                                          |
| chr7  | 10471936  | 10472054  | 0.01792  | -63.25    | 10 | 12.167  | 75.417 |                                                 |
| chr13 | 25036538  | 25036638  | 0.01792  | -62.0417  | 10 | 10.542  | 72.583 |                                                 |
| chr6  | 86274608  | 86274795  | 0.01792  | -62.00000 | 10 | 4.1667  | 66.167 | Tgfa                                            |
| chr4  | 140132551 | 140133179 | 0.01792  | -58.13317 | 10 | 5.3248  | 63.458 | Gm13027 & immunoglobulin superfamily, member 21 |

|       |           |           |         |           |    |         |        |                       |
|-------|-----------|-----------|---------|-----------|----|---------|--------|-----------------------|
| chr16 | 38028393  | 38028568  | 0.01792 | -57.119   | 10 | 1.5476  | 58.667 |                       |
| chr11 | 51992117  | 51992350  | 0.01792 | -56.8869  | 10 | 8.6667  | 65.554 | Ube2b & Gm26551       |
| chr2  | 163740267 | 163740533 | 0.01792 | -56.54761 | 10 | 5       | 61.548 | Ada                   |
| chr1  | 1.9E+08   | 1.9E+08   | 0.01792 | -56.5     | 10 | 3.5     | 60     | Cenpf                 |
| chr2  | 76919411  | 76919763  | 0.01792 | -56.25    | 10 | 4.0833  | 60.333 | Ttn                   |
| chr8  | 22625863  | 22626305  | 0.01792 | -55.78571 | 10 | 1.7143  | 57.5   | Dkk4                  |
| chr3  | 51252804  | 51253152  | 0.01792 | -54.50000 | 10 | 6.8333  | 61.333 | Elf2                  |
| chr13 | 43782780  | 43783081  | 0.01792 | -54.5     | 10 | 2.5     | 57     |                       |
| chr8  | 1.04E+08  | 1.04E+08  | 0.01792 | -54.1667  | 10 | 30.833  | 85     |                       |
| chr8  | 77382363  | 77382741  | 0.01792 | -54.05555 | 15 | 1.5     | 55.556 | Arhgap10              |
| chr1  | 89408314  | 89408606  | 0.01792 | -53.5     | 10 | 4.1667  | 57.667 |                       |
| chr15 | 1.02E+08  | 1.02E+08  | 0.01792 | -53.4726  | 10 | 4.3056  | 57.778 |                       |
| chr13 | 85103287  | 85103368  | 0.01792 | -53.4028  | 12 | 10.417  | 63.819 |                       |
| chr7  | 24709020  | 24709084  | 0.01792 | -53.2222  | 15 | 10.111  | 63.333 |                       |
| chr4  | 140576648 | 140577122 | 0.01792 | -53.06349 | 10 | 2.0833  | 55.147 | Arhgef10l             |
| chr12 | 104688366 | 104688597 | 0.01792 | -52.83333 | 10 | 5       | 57.833 | Dicer1                |
| chr7  | 30721485  | 30721705  | 0.01792 | -52.19444 | 10 | 4.5833  | 56.778 | Atp4a                 |
| chr8  | 26386507  | 26387247  | 0.01792 | -51.1548  | 10 | 1.4286  | 52.583 |                       |
| chr8  | 13930710  | 13930822  | 0.01792 | -51.10912 | 10 | 3.5417  | 54.651 | Fbxo25                |
| chr1  | 1.77E+08  | 1.77E+08  | 0.01792 | -51       | 10 | 6.6667  | 57.667 |                       |
| chr10 | 40570346  | 40570483  | 0.01792 | -50.9796  | 10 | 5.4192  | 56.399 | Slc22a16              |
| chr15 | 82010590  | 82010958  | 0.01792 | -50.58333 | 10 | 16.667  | 67.25  | Xrcc6 & Desi1         |
| chr10 | 75105956  | 75106512  | 0.01792 | -50.25000 | 10 | 1.25    | 51.5   | Bcr                   |
| chr12 | 72994817  | 72994885  | 0.01792 | -50.1984  | 12 | 6.0516  | 56.25  |                       |
| chr4  | 151753020 | 151753357 | 0.01792 | -50.05952 | 10 | 5       | 55.06  | Camta1                |
| chr5  | 122940755 | 122940973 | 0.01792 | -49.68254 | 10 | 4.0675  | 53.75  | Kdm2b                 |
| chr2  | 125200794 | 125200987 | 0.01792 | -49.58333 | 10 | 5       | 54.583 | Slc12a1               |
| chr3  | 116304918 | 116305003 | 0.01792 | -49.30952 | 10 | 4.6905  | 54     | Cdc14a                |
| chr14 | 104487331 | 104487442 | 0.01792 | -49.25378 | 10 | 8.6667  | 57.92  | Rnf219                |
| chr2  | 1.72E+08  | 1.72E+08  | 0.01792 | -48.0704  | 12 | 2.0833  | 50.154 |                       |
| chr5  | 1.06E+08  | 1.06E+08  | 0.01792 | -47.869   | 10 | 9.631   | 57.5   |                       |
| chr9  | 101923275 | 101923333 | 0.01792 | -47.83333 | 10 | 7.6667  | 55.5   | 9630041A04Rik & Ephb1 |
| chr11 | 74749315  | 74749550  | 0.01792 | -47.4226  | 10 | 1       | 48.423 |                       |
| chr12 | 8396289   | 8396407   | 0.01792 | -47.34127 | 12 | 4.1667  | 51.508 | Gm48075               |
| chr18 | 90430443  | 90430613  | 0.01792 | -47.2792  | 12 | 10.625  | 57.904 |                       |
| chr6  | 83627347  | 83627776  | 0.01792 | -47.2735  | 12 | 2.1875  | 49.461 |                       |
| chr4  | 131909310 | 131909530 | 0.01792 | -47.10317 | 10 | 2.5     | 49.603 | Gm12992               |
| chr8  | 1.21E+08  | 1.21E+08  | 0.01792 | -46.5476  | 10 | 1.25    | 47.798 | Gm20388               |
| chr18 | 12660106  | 12660429  | 0.01792 | -46.42261 | 10 | 6.4226  | 52.845 | Ttc39c                |
| chr2  | 135967918 | 135968173 | 0.01792 | -46.41203 | 12 | 1.6667  | 48.079 | Plcb4                 |
| chr3  | 87529842  | 87530213  | 0.01792 | -45.9848  | 11 | 1.5152  | 47.5   | Etv3                  |
| chr8  | 31315505  | 31315969  | 0.01792 | -45.869   | 10 | 0.7143  | 46.583 |                       |
| chr7  | 25724472  | 25724835  | 0.01792 | -45.57870 | 12 | 1.6667  | 47.245 | Hnrnpul1              |
| chr6  | 24572496  | 24572655  | 0.01792 | -45.50000 | 10 | 4.5     | 50     | Asb15                 |
| chr11 | 116343365 | 116343600 | 0.01792 | -45.40476 | 10 | 1.4286  | 46.833 | Rnf157                |
| chr11 | 61507779  | 61508070  | 0.01792 | -45.14285 | 10 | 2.6667  | 47.81  | B9d1                  |
| chr2  | 132850047 | 132850358 | 0.01792 | -45.08928 | 10 | 2.9167  | 48.006 | Crls1                 |
| chr11 | 65848302  | 65848624  | 0.01792 | -45.03968 | 12 | 5.625   | 50.665 | Dnah9                 |
| chr3  | 1.52E+08  | 1.52E+08  | 0.01792 | -44.9405  | 10 | 1.6667  | 46.607 | Dnajb4                |
| chr5  | 26929802  | 26929933  | 0.01792 | -44.84920 | 10 | 2.2222  | 47.071 | Dpp6                  |
| chr14 | 75931167  | 75931363  | 0.01792 | -44.35941 | 21 | 0.68027 | 45.04  | Gtf2f2                |
| chr19 | 3265512   | 3265635   | 0.01792 | -44.19047 | 10 | 1       | 45.19  | Ighmbp2               |
| chr11 | 49943126  | 49943751  | 0.01792 | -44.00000 | 10 | 1.6667  | 45.667 | Rasgef1c              |
| chr17 | 87573548  | 87574138  | 0.01792 | -43.75    | 10 | 8.75    | 52.5   |                       |
| chr5  | 77001486  | 77001632  | 0.01792 | -43.6615  | 11 | 8.9991  | 52.661 |                       |
| chr5  | 1.22E+08  | 1.22E+08  | 0.01792 | -43.2624  | 10 | 2.44    | 45.702 |                       |

|       |           |           |         |           |    |         |        |                      |
|-------|-----------|-----------|---------|-----------|----|---------|--------|----------------------|
| chr8  | 94086137  | 94086167  | 0.01792 | -43.11309 | 10 | 9.375   | 52.488 | Bbs2                 |
| chr4  | 106665938 | 106666204 | 0.01792 | -42.89881 | 10 | 4.1538  | 47.053 | Ttc4                 |
| chr17 | 34678682  | 34678945  | 0.01792 | -42.86111 | 10 | 1.25    | 44.111 | Tnxb                 |
| chr2  | 84876816  | 84876990  | 0.01792 | -42.7083  | 10 | 3.5417  | 46.25  | Rtn4rl2              |
| chr10 | 13855882  | 13856216  | 0.01792 | -42.62500 | 10 | 2.5     | 45.125 | Aig1                 |
| chr3  | 105545910 | 105546048 | 0.01792 | -42.06746 | 10 | 1.25    | 43.317 | Kcnd3                |
| chr17 | 25777482  | 25778026  | 0.01792 | -41.95833 | 10 | 2       | 43.958 | Narfl                |
| chr15 | 12886992  | 12887303  | 0.01792 | -41.91666 | 10 | 5       | 46.917 | Drosha               |
| chr3  | 142184601 | 142184728 | 0.01792 | -41.91666 | 10 | 7.6667  | 49.583 | Gm6059               |
| chr3  | 51227548  | 51227793  | 0.01792 | -41.69191 | 11 | 0.90909 | 42.601 | Noct                 |
| chr16 | 95987406  | 95987603  | 0.01792 | -41.68154 | 12 | 3.5069  | 45.188 | Psmg1                |
| chr17 | 48325516  | 48325744  | 0.01792 | -41.5119  | 10 | 1.6667  | 43.179 | B430306N03Rik        |
| chr4  | 136770957 | 136770994 | 0.01792 | -41.50000 | 10 | 3.75    | 45.25  | Ephb2                |
| chr7  | 29355749  | 29356271  | 0.01792 | -41.4821  | 10 | 1.6667  | 43.149 | Sipa1l3              |
| chr8  | 11050411  | 11050794  | 0.01792 | -41.4762  | 10 | 0.7143  | 42.19  | 9530052E02Rik        |
| chr6  | 73087521  | 73087666  | 0.01792 | -41.13095 | 10 | 1.25    | 42.381 | Dnah6                |
| chr3  | 78880162  | 78880291  | 0.01792 | -40.4167  | 10 | 3.3333  | 43.75  |                      |
| chr2  | 1.69E+08  | 1.69E+08  | 0.01792 | -39.9825  | 17 | 6.6176  | 46.6   |                      |
| chr5  | 20600542  | 20600945  | 0.01792 | -39.9702  | 12 | 2.0833  | 42.054 | Magi2                |
| chr12 | 103171387 | 103171607 | 0.01792 | -39.93975 | 10 | 3.4432  | 43.383 | Unc79                |
| chr8  | 47326804  | 47327030  | 0.01792 | -39.67234 | 10 | 2.5     | 42.172 | Stox2                |
| chr4  | 8189320   | 8189605   | 0.01792 | -39.5833  | 10 | 1.25    | 40.833 | Car8                 |
| chr7  | 98711766  | 98712439  | 0.01792 | -39.48214 | 10 | 4.375   | 43.857 | Thap12               |
| chr4  | 1.52E+08  | 1.52E+08  | 0.01792 | -39.2738  | 10 | 6.25    | 45.524 | Dnajc11              |
| chr5  | 140360264 | 140360441 | 0.01792 | -39.18055 | 10 | 2       | 41.181 | Snx8                 |
| chr12 | 4797277   | 4797477   | 0.01792 | -39.1667  | 10 | 5       | 44.167 |                      |
| chr4  | 1.18E+08  | 1.18E+08  | 0.01792 | -38.9287  | 17 | 5.4902  | 44.419 | Slc6a9 &<br>Gm17114  |
| chr3  | 1.44E+08  | 1.44E+08  | 0.01792 | -38.9286  | 12 | 1.0417  | 39.97  |                      |
| chr2  | 28009626  | 28010195  | 0.01792 | -38.64661 | 19 | 2.8352  | 41.482 | Col5a1               |
| chr11 | 70514485  | 70514524  | 0.01792 | -38.63095 | 10 | 5       | 43.631 | Vmo1                 |
| chr1  | 1.9E+08   | 1.9E+08   | 0.01792 | -38.5595  | 10 | 2.5     | 41.06  | Ptpn14               |
| chr14 | 79143160  | 79143542  | 0.01792 | -38.416   | 12 | 2.2222  | 40.638 | Vwa8                 |
| chr4  | 133420611 | 133420709 | 0.01792 | -38.31547 | 10 | 2.5     | 40.815 | Slc9a1               |
| chr3  | 55117449  | 55117663  | 0.01792 | -38.14682 | 10 | 0.71429 | 38.861 | Spg20                |
| chr11 | 52478752  | 52479180  | 0.01792 | -38.08928 | 10 | 0.625   | 38.714 | Gm12209              |
| chr5  | 112464594 | 112464878 | 0.01792 | -37.83201 | 15 | 4.8929  | 42.725 | Sez6l                |
| chr4  | 1.48E+08  | 1.48E+08  | 0.01792 | -37.6667  | 10 | 1       | 38.667 | Cln6                 |
| chr5  | 88112668  | 88112879  | 0.01792 | -37.4365  | 15 | 5.3333  | 42.77  |                      |
| chr11 | 53544431  | 53544915  | 0.01792 | -37.3039  | 10 | 5       | 42.304 | Sept8                |
| chr19 | 4226729   | 4227034   | 0.01792 | -37.1255  | 10 | 1.6667  | 38.792 |                      |
| chr5  | 135386726 | 135386931 | 0.01792 | -37.08333 | 10 | 1       | 38.083 | Pom121               |
| chr7  | 25664414  | 25664506  | 0.01792 | -36.7478  | 10 | 3       | 39.748 | Exosc5               |
| chr5  | 113846157 | 113846664 | 0.01792 | -36.55799 | 15 | 2.3333  | 38.891 | Coro1c               |
| chr4  | 33251799  | 33252048  | 0.01792 | -36.52381 | 10 | 2.5     | 39.024 | Pnrc1                |
| chr8  | 70149144  | 70149746  | 0.01792 | -36.51893 | 10 | 1       | 37.519 | Mef2b                |
| chr15 | 81705998  | 81706435  | 0.01792 | -36.50000 | 10 | 1.25    | 37.75  | Rangap1              |
| chr6  | 91334612  | 91335023  | 0.01792 | -36.5     | 10 | 2.4286  | 38.929 |                      |
| chr17 | 70882915  | 70883266  | 0.01792 | -36.39285 | 10 | 0.83333 | 37.226 | Gm26510 &<br>Gm26561 |
| chr7  | 127023536 | 127023673 | 0.01792 | -36.38888 | 12 | 1.0417  | 37.431 | Maz                  |
| chr8  | 1.04E+08  | 1.04E+08  | 0.01792 | -36.375   | 10 | 2.2917  | 38.667 | Gm29682              |
| chr12 | 17380333  | 17380693  | 0.01792 | -36.33333 | 10 | 1       | 37.333 | Nol10                |
| chr3  | 57942944  | 57942988  | 0.01792 | -36.3194  | 12 | 8.3333  | 44.653 | Gm42511              |
| chr7  | 19053966  | 19054099  | 0.01792 | -36.25649 | 10 | 1.6667  | 37.923 | Sympk                |
| chr7  | 4666497   | 4666998   | 0.01792 | -36.22041 | 10 | 1.5     | 37.72  | Hspbbp1              |
| chr4  | 56743895  | 56744083  | 0.01792 | -36.05357 | 10 | 4.0179  | 40.071 | Actl7a               |
| chr16 | 94768950  | 94769218  | 0.01792 | -36.00595 | 10 | 0.71429 | 36.72  | Kcnj6                |

|       |           |           |         |           |    |         |        |                    |
|-------|-----------|-----------|---------|-----------|----|---------|--------|--------------------|
| chr1  | 88261410  | 88261949  | 0.01792 | -35.98265 | 10 | 1.7143  | 37.697 | Mroh2a             |
| chr14 | 63168694  | 63168999  | 0.01792 | -35.94534 | 10 | 5       | 40.945 | Fdft1              |
| chr2  | 170517958 | 170518329 | 0.01792 | -35.83333 | 10 | 2.5     | 38.333 | Pfdn4              |
| chr11 | 118272070 | 118272224 | 0.01792 | -35.35353 | 10 | 2.0556  | 37.409 | Usp36              |
| chrX  | 140432131 | 140432258 | 0.01792 | -35.25000 | 10 | 1.25    | 36.5   | Frmpd3             |
| chr5  | 25163452  | 25163688  | 0.01792 | -34.9028  | 10 | 4.1667  | 39.069 |                    |
| chr13 | 51750444  | 51750799  | 0.01792 | -34.89087 | 12 | 3.373   | 38.264 | Sema4d             |
| chr17 | 33948484  | 33948649  | 0.01792 | -34.72619 | 10 | 2.0833  | 36.81  | Wdr46              |
| chr5  | 113192790 | 113192874 | 0.01792 | -34.42956 | 12 | 1.9097  | 36.339 | 2900026A02Rik      |
| chr4  | 139425253 | 139425788 | 0.01792 | -34.38095 | 10 | 5.8333  | 40.214 | Ubr4               |
| chrX  | 87838526  | 87838615  | 0.01792 | -34.38095 | 10 | 4.1667  | 38.548 | Il1rapl1           |
| chr6  | 113517916 | 113518261 | 0.01792 | -34.32702 | 10 | 1.9091  | 36.236 | Emc3               |
| chr1  | 33643884  | 33644350  | 0.01792 | -34.25    | 10 | 5       | 39.25  | Prim2              |
| chr4  | 45399435  | 45399579  | 0.01792 | -34.25000 | 10 | 2.5     | 36.75  | Slc25a51           |
| chr9  | 120052153 | 120052226 | 0.01792 | -34.18921 | 12 | 2.9735  | 37.163 | Cx3cr1             |
| chr4  | 117595678 | 117596209 | 0.01792 | -34.16666 | 12 | 8.3333  | 42.5   | Eri3               |
| chr9  | 22014495  | 22014723  | 0.01792 | -34.0952  | 10 | 2.8333  | 36.929 |                    |
| chr17 | 27560839  | 27561045  | 0.01792 | -34.06862 | 17 | 3.7115  | 37.78  | Hmga1              |
| chr1  | 159858197 | 15985865  | 0.01792 | -33.77451 | 17 | 0.98039 | 34.755 | Tnr                |
| chr1  | 55279301  | 55279695  | 0.01792 | -33.2619  | 10 | 6.5952  | 39.857 | Boll               |
| chr4  | 104507795 | 104508299 | 0.01792 | -33.00000 | 10 | 1.25    | 34.25  | Dab1               |
| chr7  | 30023217  | 30023423  | 0.01792 | -32.9206  | 10 | 2.5     | 35.421 | Zfp568             |
| chr2  | 166589566 | 166589626 | 0.01792 | -32.67023 | 12 | 1.6369  | 34.307 | Prex1              |
| chr4  | 136680869 | 136681078 | 0.01792 | -32.52381 | 10 | 2.2619  | 34.786 | Ephb2              |
| chrX  | 89488425  | 89488561  | 0.01792 | -32.504   | 15 | 12.712  | 45.216 |                    |
| chr18 | 23931730  | 23932200  | 0.01792 | -32.5     | 12 | 2.0833  | 34.583 |                    |
| chr17 | 29345292  | 29345617  | 0.01792 | -32.4412  | 10 | 5.625   | 38.066 | Mtch1              |
| chr11 | 55221849  | 55222414  | 0.01792 | -32.27182 | 12 | 0.83333 | 33.105 | Slc36a1            |
| chr4  | 89115333  | 89115539  | 0.01792 | -32.19697 | 11 | 1.5152  | 33.712 | Gm12602            |
| chr4  | 107137579 | 107137639 | 0.01792 | -32.19444 | 10 | 3.8889  | 36.083 | Tceanc2            |
| chr14 | 65782809  | 65782971  | 0.01792 | -32.1667  | 10 | 1       | 33.167 |                    |
| chr8  | 117612850 | 117613006 | 0.01792 | -32.08333 | 10 | 3.6667  | 35.75  | Plcg2              |
| chr1  | 192668596 | 192668809 | 0.01792 | -32.02381 | 10 | 2       | 34.024 | Hhat               |
| chr15 | 31411229  | 31411438  | 0.01792 | -32.0119  | 10 | 1.25    | 33.262 |                    |
| chr5  | 130212006 | 130212091 | 0.01792 | -32.00000 | 10 | 4.1667  | 36.167 | Rabgef1            |
| chr1  | 180169286 | 180169474 | 0.01792 | -31.88461 | 10 | 2.25    | 34.135 | Coq8a              |
| chr10 | 81530791  | 81530958  | 0.01792 | -31.86670 | 10 | 0.90909 | 32.776 | Gna11              |
| chr14 | 31282137  | 31282417  | 0.01792 | -31.81944 | 10 | 3.2143  | 35.034 | Dnah1 &<br>Gm35823 |
| chr4  | 1.5E+08   | 1.5E+08   | 0.01792 | -31.8158  | 10 | 5       | 36.816 | Ctnnbip1           |
| chr4  | 1.31E+08  | 1.31E+08  | 0.01792 | -31.7798  | 10 | 5       | 36.78  |                    |
| chr18 | 35980010  | 35980073  | 0.01792 | -31.50000 | 10 | 8.3333  | 39.833 | Psd2               |
| chr2  | 28208160  | 28208236  | 0.01792 | -31.43055 | 10 | 0.625   | 32.056 | Olfm1              |
| chr9  | 1E+08     | 1E+08     | 0.01792 | -31.3373  | 10 | 1       | 32.337 |                    |
| chr13 | 1.07E+08  | 1.07E+08  | 0.01792 | -31.1924  | 21 | 2.4698  | 33.662 | Ipo11              |
| chr11 | 117271630 | 117271829 | 0.01792 | -31.17460 | 10 | 2.1111  | 33.286 | Sept9              |
| chr8  | 13613096  | 13613265  | 0.01792 | -31.16071 | 12 | 4.5139  | 35.675 | Rasa3              |
| chr2  | 25680656  | 25680905  | 0.01792 | -31.1553  | 10 | 2.5     | 33.655 | Lcn6               |
| chr13 | 19531027  | 19531567  | 0.01792 | -30.9821  | 10 | 4.1667  | 35.149 |                    |
| chr5  | 142494870 | 142494953 | 0.01792 | -30.84845 | 10 | 2.7917  | 33.64  | Radil              |
| chr12 | 83612060  | 83612342  | 0.01792 | -30.7262  | 10 | 2.6786  | 33.405 |                    |
| chr8  | 12508936  | 12509253  | 0.01792 | -30.5952  | 11 | 1.1364  | 31.732 |                    |
| chr2  | 1.68E+08  | 1.68E+08  | 0.01792 | -30.2798  | 10 | 10      | 40.28  |                    |
| chr5  | 1.06E+08  | 1.06E+08  | 0.01792 | -30.25    | 10 | 1.8333  | 32.083 |                    |
| chr9  | 63815333  | 63815938  | 0.01792 | -30.248   | 12 | 8.7121  | 38.96  |                    |
| chr17 | 27147787  | 27148129  | 0.01792 | -30.15377 | 12 | 4.1667  | 34.32  | Ip6k3              |
| chr8  | 47866556  | 47867173  | 0.01792 | -30.00000 | 12 | 0.83333 | 30.833 | Wwc2               |
| chr17 | 87041605  | 87041856  | 0.01792 | -29.7897  | 10 | 0.5556  | 30.345 |                    |

|       |           |           |         |           |    |         |        |                     |
|-------|-----------|-----------|---------|-----------|----|---------|--------|---------------------|
| chr2  | 32647698  | 32648137  | 0.01792 | -29.76851 | 12 | 1.3889  | 31.157 | Eng                 |
| chr11 | 83864101  | 83864323  | 0.01792 | -29.69246 | 12 | 5.5556  | 35.248 | Hnf1b               |
| chr2  | 174454113 | 174454357 | 0.01792 | -29.69047 | 10 | 1.25    | 30.94  | Tubb1               |
| chr17 | 33935645  | 33935857  | 0.01792 | -29.67322 | 12 | 0.69444 | 30.368 | Rgl2                |
| chr4  | 136441598 | 136441910 | 0.01792 | -29.57539 | 10 | 2.2222  | 31.798 | Htr1d               |
| chr4  | 47536764  | 47537008  | 0.01792 | -29.5337  | 12 | 2.7778  | 32.312 |                     |
| chr7  | 13052728  | 13052943  | 0.01792 | -29.49150 | 10 | 1.3393  | 30.831 | Mzf1                |
| chr11 | 118333541 | 118333680 | 0.01792 | -29.48677 | 15 | 1.0317  | 30.519 | Timp2 &             |
| chr10 | 79860558  | 79860872  | 0.01792 | -29.4643  | 10 | 2.5     | 31.964 | Ptbp1 & Plpp3       |
| chr18 | 35686686  | 35687187  | 0.01792 | -29.36111 | 10 | 1.6667  | 31.028 | Dnajc18             |
| chr9  | 1.1E+08   | 1.1E+08   | 0.01792 | -29.3361  | 12 | 0.6944  | 30.031 | Ptpn23              |
| chr11 | 16514387  | 16514497  | 0.01792 | -29.3333  | 10 | 5.8333  | 35.167 |                     |
| chr4  | 143117255 | 143117445 | 0.01792 | -29.30555 | 10 | 3.7778  | 33.083 | Prdm2               |
| chr11 | 97448180  | 97448451  | 0.01792 | -29.21131 | 12 | 2.5     | 31.711 | Arhgap23            |
| chr2  | 138441299 | 138441706 | 0.01792 | -29.19047 | 10 | 2.5     | 31.69  | Btbd3               |
| chr2  | 34857364  | 34858007  | 0.01792 | -29.05627 | 10 | 1.9091  | 30.965 | Psmc5               |
| chr10 | 67909337  | 67909515  | 0.01792 | -28.96660 | 24 | 0.9375  | 29.904 | Zfp365              |
| chr5  | 146288073 | 146288529 | 0.01792 | -28.93249 | 17 | 1.8382  | 30.771 | Cdk8                |
| chr14 | 54934675  | 54935252  | 0.01792 | -28.85000 | 25 | 2.769   | 31.619 | Il25                |
| chr4  | 1.52E+08  | 1.52E+08  | 0.01792 | -28.7143  | 15 | 1.9444  | 30.659 | Acot7               |
| chr13 | 47355992  | 47356251  | 0.01792 | -28.6429  | 10 | 5.8333  | 34.476 |                     |
| chr11 | 86921009  | 86921647  | 0.01792 | -28.5422  | 10 | 1.8333  | 30.376 |                     |
| chr2  | 104241060 | 104241319 | 0.01792 | -28.37872 | 10 | 2.0856  | 30.464 | D430041D05Rik       |
| chr17 | 25248349  | 25248546  | 0.01792 | -28.34722 | 10 | 1.875   | 30.222 | Baiap3              |
| chr8  | 117113948 | 117114177 | 0.01792 | -28.25000 | 10 | 0.83333 | 29.083 | Bco1                |
| chr12 | 69453211  | 69453403  | 0.01792 | -28.25    | 10 | 1.7143  | 29.964 |                     |
| chr3  | 31224143  | 31224549  | 0.01792 | -28.18181 | 12 | 6.25    | 34.432 | Slc7a14             |
| chr8  | 1.2E+08   | 1.2E+08   | 0.01792 | -28.1167  | 12 | 1.875   | 29.992 | Gse1 & Gm20388      |
| chr11 | 115845446 | 115845657 | 0.01792 | -28.03221 | 17 | 8.0392  | 36.071 | Llgl2               |
| chr12 | 1.11E+08  | 1.11E+08  | 0.01792 | -27.9825  | 17 | 6.3725  | 34.355 | Dync1h1             |
| chr14 | 1.18E+08  | 1.18E+08  | 0.01792 | -27.9643  | 10 | 2.5     | 30.464 | Abcc4               |
| chr16 | 35267198  | 35267342  | 0.01792 | -27.96428 | 10 | 1       | 28.964 | Adcy5               |
| chr15 | 82372784  | 82373271  | 0.01792 | -27.94913 | 11 | 7.1699  | 35.119 | Cyp2d22             |
| chr1  | 59099585  | 59099705  | 0.01792 | -27.9167  | 10 | 1.6667  | 29.583 |                     |
| chr6  | 113694168 | 113694387 | 0.01792 | -27.85714 | 10 | 2.5     | 30.357 | Irak2               |
| chr11 | 72448745  | 72448940  | 0.01792 | -27.75985 | 10 | 1.25    | 29.01  | Mybbp1a             |
| chr8  | 1.22E+08  | 1.22E+08  | 0.01792 | -27.4967  | 12 | 2.2222  | 29.719 | Fbxo31 &<br>Gm20388 |
| chr17 | 25391000  | 25391263  | 0.01792 | -27.45238 | 10 | 3       | 30.452 | Cacna1h             |
| chrX  | 95426562  | 95426733  | 0.01792 | -27.4504  | 12 | 1.0417  | 28.492 | Amer1               |
| chr9  | 108070616 | 108070750 | 0.01792 | -27.33766 | 11 | 1.5152  | 28.853 | Rnf123              |
| chr7  | 44900617  | 44900838  | 0.01792 | -27.25790 | 15 | 7.4617  | 34.72  | Fuz & Ap2a1         |
| chr8  | 122437438 | 122437580 | 0.01792 | -27.19749 | 10 | 2.25    | 29.447 | Mvd & Gm20388       |
| chr5  | 24435255  | 24435349  | 0.01792 | -26.8234  | 10 | 1.9643  | 28.788 | Slc4a2              |
| chr12 | 103333429 | 103333932 | 0.01792 | -26.77862 | 28 | 1.2571  | 28.036 | Asb2                |
| chr10 | 77170506  | 77170865  | 0.01792 | -26.71    | 11 | 2.2727  | 28.983 |                     |
| chr2  | 1.79E+08  | 1.79E+08  | 0.01792 | -26.6127  | 12 | 2.9514  | 29.564 | Cdh4                |
| chr12 | 110662936 | 110663017 | 0.01792 | -26.59556 | 12 | 7.2735  | 33.869 | Dync1h1             |
| chr8  | 105702950 | 105703159 | 0.01792 | -26.59043 | 19 | 3.0107  | 29.601 | Pard6a              |
| chr15 | 37040369  | 37041050  | 0.01792 | -26.52381 | 10 | 2.5     | 29.024 | Gm26766             |
| chr7  | 1.4E+08   | 1.4E+08   | 0.01792 | -26.4758  | 10 | 5.4226  | 31.898 | Olfir524            |
| chr7  | 1.27E+08  | 1.27E+08  | 0.01792 | -26.2262  | 10 | 3       | 29.226 | Coro1a              |
| chr6  | 71946965  | 71947341  | 0.01792 | -26.15079 | 12 | 0.46296 | 26.614 | Polr1a              |
| chr19 | 45001605  | 45001754  | 0.01792 | -26.07539 | 10 | 1.6667  | 27.742 | Sema4g              |
| chr1  | 89772260  | 89772392  | 0.01792 | -26.0298  | 10 | 7       | 33.03  | Agap1               |
| chr17 | 66148170  | 66148670  | 0.01792 | -25.96428 | 10 | 2       | 27.964 | Ddx11               |
| chr15 | 99814901  | 99815110  | 0.01792 | -25.94047 | 10 | 3.3333  | 29.274 | Lima1               |
| chr6  | 54499909  | 54500589  | 0.01792 | -25.92691 | 17 | 0.98039 | 26.907 | Wipf3               |



|       |           |           |          |           |    |         |        |                   |
|-------|-----------|-----------|----------|-----------|----|---------|--------|-------------------|
| chr4  | 132753850 | 132754058 | 0.01792  | -25.92261 | 10 | 2.5     | 28.423 | Smpdl3b           |
| chr8  | 20267667  | 20268044  | 0.01792  | -25.9073  | 12 | 3.9836  | 29.891 | 6820431F20Rik     |
| chr11 | 98155632  | 98155972  | 0.01792  | -25.89285 | 10 | 1.25    | 27.143 | Med1              |
| chr10 | 62839366  | 62839731  | 0.01792  | -25.86904 | 10 | 0.83333 | 26.702 | Tet1              |
| chr15 | 45692260  | 45692555  | 0.01792  | -25.7558  | 10 | 2.7917  | 28.547 |                   |
| chr9  | 22511863  | 22512351  | 0.01792  | -25.67640 | 11 | 3.9394  | 29.616 | Bbs9              |
| chr13 | 51725244  | 51725510  | 0.01792  | -25.6262  | 10 | 2.8571  | 28.483 | Sema4d            |
| chr2  | 130593421 | 130593989 | 0.01792  | -25.43154 | 12 | 2.2222  | 27.654 | Ubox5             |
| chr5  | 113309530 | 113310100 | 0.01792  | -25.34313 | 17 | 19.118  | 44.461 | Sgsm1             |
| chr5  | 112999854 | 113000047 | 0.01792  | -25.23053 | 21 | 2.74    | 27.971 | Grk3              |
| chr11 | 1.13E+08  | 1.13E+08  | 0.01792  | -25.1471  | 10 | 0.3846  | 25.532 |                   |
| chr4  | 1.07E+08  | 1.07E+08  | 0.01792  | -25.0062  | 10 | 1.25    | 26.256 |                   |
| chr14 | 30559669  | 30559721  | 0.01792  | -24.89826 | 10 | 0.625   | 25.523 | Tkt               |
| chr18 | 83001317  | 83001523  | 0.01792  | -24.8862  | 15 | 2.9074  | 27.794 | Zfp516            |
| chr5  | 138983860 | 138984407 | 0.01792  | -24.78192 | 10 | 3.9286  | 28.71  | Pdgfa             |
| chr19 | 42022910  | 42022999  | 0.01792  | -24.72222 | 10 | 2.5     | 27.222 | Ubtd1             |
| chr9  | 58516863  | 58517249  | 0.01792  | -24.6726  | 12 | 3.8194  | 28.492 |                   |
| chr7  | 19387870  | 19387969  | 0.01792  | -24.5425  | 17 | 3.8177  | 28.36  | Ercc2 & Gm26852   |
| chr7  | 64662077  | 64662458  | 0.01792  | -24.52947 | 21 | 1.0714  | 25.601 | Apba2             |
| chr3  | 1.17E+08  | 1.17E+08  | 0.01792  | -24.5205  | 12 | 0.5952  | 25.116 | Mfsd14a & Gm43191 |
| chr9  | 110506667 | 110506809 | 0.01792  | -24.50000 | 10 | 9.6667  | 34.167 | Kif9              |
| chr11 | 106398438 | 106398730 | 0.01792  | -24.48618 | 10 | 8.2995  | 32.786 | Ern1              |
| chr16 | 18795743  | 18795909  | 0.01792  | -24.44480 | 10 | 4.2143  | 28.659 | Cdc45             |
| chr6  | 83439362  | 83439896  | 0.01792  | -24.38    | 12 | 2.0833  | 26.463 | Tet3              |
| chr5  | 134137468 | 134138119 | 0.01792  | -24.36409 | 11 | 2.2727  | 26.637 | Castor2           |
| chr1  | 1.63E+08  | 1.63E+08  | 0.01792  | -24.3333  | 10 | 2.0833  | 26.417 |                   |
| chr15 | 99248467  | 99248873  | 0.01792  | -24.32265 | 15 | 1.0833  | 25.406 | Mcrs1             |
| chr9  | 119797284 | 119797616 | 0.01792  | -24.28246 | 10 | 1       | 25.282 | Scn11a            |
| chr2  | 29667607  | 29668108  | 0.01792  | -24.10714 | 10 | 3.9087  | 28.016 | Rapgef1           |
| chr4  | 150618121 | 150618487 | 0.01792  | -24.06150 | 10 | 1.6667  | 25.728 | Rere              |
| chr5  | 1.18E+08  | 1.18E+08  | 0.01792  | -23.9286  | 10 | 2.5     | 26.429 | Ksr2              |
| chr15 | 73765258  | 73765329  | 0.01792  | -23.9167  | 10 | 3.3333  | 27.25  | Mroh5             |
| chr10 | 61985193  | 61986102  | 0.01792  | -23.7738  | 10 | 8.381   | 32.155 |                   |
| chr15 | 72742913  | 72743016  | 0.01792  | -23.56451 | 10 | 1.8727  | 25.437 | Trappc9           |
| chr10 | 62950935  | 62951406  | 0.01792  | -23.47718 | 12 | 1.3889  | 24.866 | Dna2              |
| chr2  | 1.67E+08  | 1.67E+08  | 0.01792  | -23.2996  | 10 | 4.6667  | 27.966 | Prex1             |
| chr8  | 46111740  | 46112184  | 0.01792  | -23.05224 | 12 | 2.9167  | 25.969 | Snx25             |
| chr17 | 24679689  | 24679919  | 1.79E-02 | -22.9708  | 10 | 3.381   | 26.352 | Zfp598            |
| chr15 | 76181046  | 76181164  | 0.01792  | -22.8258  | 10 | 3.6971  | 26.523 | Plec              |
| chr17 | 32333543  | 32333799  | 0.01792  | -22.80952 | 10 | 1       | 23.81  | Akap8l            |
| chr8  | 36584134  | 36584273  | 0.01792  | -22.75649 | 10 | 6.5476  | 29.304 | Dlc1              |
| chr7  | 1.45E+08  | 1.45E+08  | 0.01792  | -22.7343  | 10 | 1.9643  | 24.699 |                   |
| chr1  | 1.89E+08  | 1.89E+08  | 0.01792  | -22.7341  | 10 | 0.8333  | 23.567 |                   |
| chr10 | 76503956  | 76504439  | 0.01792  | -22.6578  | 12 | 1.0417  | 23.699 | Mcm3ap            |
| chr14 | 54961056  | 54961209  | 0.01792  | -22.62770 | 10 | 1.1111  | 23.739 | Myh6              |
| chr11 | 113810688 | 113810917 | 0.01792  | -22.48015 | 12 | 4.375   | 26.855 | Sdk2              |
| chr9  | 8751494   | 8752069   | 0.01792  | -22.4405  | 10 | 10      | 32.44  |                   |
| chr2  | 166625109 | 166625356 | 0.01792  | -22.42296 | 17 | 8.8796  | 31.303 | Prex1             |
| chr7  | 65072367  | 65073124  | 0.01792  | -22.38678 | 17 | 1.4706  | 23.857 | Fam189a1          |
| chr4  | 125540871 | 125540966 | 0.01792  | -22.35539 | 10 | 3.2143  | 25.57  | Grik3             |
| chr18 | 64386353  | 64386555  | 0.01792  | -22.13056 | 12 | 0.83333 | 22.964 | Onecut2           |
| chr11 | 75621012  | 75621247  | 0.01792  | -21.95271 | 12 | 1.3889  | 23.342 | Pitpna            |
| chr4  | 150616899 | 150617044 | 0.01792  | -21.92460 | 15 | 9.1616  | 31.086 | Rere              |
| chr7  | 75757417  | 75757646  | 0.01792  | -21.9167  | 10 | 12.5    | 34.417 |                   |
| chrX  | 36415162  | 36415541  | 0.01792  | -21.8601  | 12 | 2.4802  | 24.34  |                   |
| chr2  | 156043137 | 156043374 | 0.01792  | -21.74007 | 10 | 1.875   | 23.615 | Fer1l4            |
| chrX  | 73421810  | 73421968  | 0.01792  | -21.7083  | 10 | 0.8333  | 22.542 | Zfp92             |

|       |           |           |          |           |    |         |        |                         |
|-------|-----------|-----------|----------|-----------|----|---------|--------|-------------------------|
| chr5  | 31070315  | 31070376  | 0.01792  | -21.59920 | 10 | 1.3889  | 22.988 | Cad                     |
| chr16 | 32777537  | 32777718  | 0.01792  | -21.5972  | 10 | 2.5     | 24.097 | Muc20 & Muc4            |
| chr11 | 68783152  | 68783247  | 0.01792  | -21.55591 | 10 | 0.55556 | 22.111 | Myh10                   |
| chr9  | 43312437  | 43312767  | 0.01792  | -21.53210 | 10 | 1.25    | 22.782 | Trim29                  |
| chr11 | 72977650  | 72978358  | 0.01792  | -21.49626 | 17 | 0.88235 | 22.379 | Atp2a3                  |
| chr4  | 1.52E+08  | 1.52E+08  | 0.01792  | -21.317   | 17 | 5.6919  | 27.009 | Zbtb48                  |
| chr12 | 1.13E+08  | 1.13E+08  | 0.01792  | -21.1583  | 11 | 1.1364  | 22.295 |                         |
| chr5  | 112475221 | 112475322 | 0.01792  | -21.13940 | 10 | 1.6667  | 22.806 | Sez6l                   |
| chr14 | 63373538  | 63373687  | 0.01792  | -21.12408 | 10 | 1.7361  | 22.86  | Blk                     |
| chr17 | 55950542  | 55950888  | 0.01792  | -20.9337  | 10 | 0.7738  | 21.708 |                         |
| chr7  | 19593120  | 19593302  | 0.01792  | -20.91468 | 10 | 1.6667  | 22.581 | Clasrp                  |
| chr10 | 76549780  | 76549931  | 0.01792  | -20.9094  | 12 | 8.3333  | 29.243 | Lss & 4930483K19Rik     |
| chr19 | 6219359   | 6219746   | 0.01792  | -20.78571 | 10 | 7.4643  | 28.25  | Majin                   |
| chr17 | 6739640   | 6739723   | 0.01792  | -20.76190 | 10 | 7.5     | 28.262 | Ezr                     |
| chr1  | 136148648 | 136148830 | 0.01792  | -20.73898 | 10 | 1.2879  | 22.027 | Kif21b                  |
| chr15 | 98851488  | 98851635  | 0.01792  | -20.69047 | 10 | 1       | 21.69  | Kmt2d                   |
| chr11 | 79605542  | 79605795  | 0.01792  | -20.58231 | 12 | 2.5     | 23.082 | Rab11fip4               |
| chr11 | 5716394   | 5716554   | 0.01792  | -20.5688  | 12 | 1.875   | 22.444 | Urgcp                   |
| chr4  | 1.27E+08  | 1.27E+08  | 0.01792  | -20.4353  | 10 | 1.1111  | 21.546 | Tfap2e                  |
| chr9  | 45097180  | 45097432  | 0.01792  | -20.42063 | 10 | 1.25    | 21.671 | Jaml                    |
| chr7  | 45722395  | 45722686  | 0.01792  | -20.38525 | 24 | 1.7063  | 22.092 | Fam83e                  |
| chr17 | 24606175  | 24606595  | 0.01792  | -20.07558 | 21 | 6.4683  | 26.544 | Tsc2                    |
| chr5  | 35080191  | 35080370  | 0.01792  | -20.00775 | 10 | 5.2363  | 25.244 | Dok7                    |
| chr15 | 76172657  | 76172976  | 0.01792  | -19.72703 | 21 | 6.1999  | 25.927 | Plec                    |
| chr7  | 142306048 | 142306318 | 0.01792  | -19.51177 | 17 | 3.4314  | 22.943 | Gm5054                  |
| chr16 | 11727377  | 11728023  | 0.01792  | -19.46358 | 17 | 2.3958  | 21.859 | Snx29                   |
| chr5  | 63918718  | 63919018  | 0.01792  | -19.41666 | 10 | 5       | 24.417 | Rell1                   |
| chr10 | 59905446  | 59905567  | 0.01792  | -19.0615  | 10 | 3.25    | 22.312 |                         |
| chr8  | 110894625 | 110894704 | 0.01792  | -18.91865 | 12 | 4.8611  | 23.78  | Gm26816 & fucose kinase |
| chr11 | 60200193  | 60200922  | 0.01792  | -18.88201 | 29 | 4.3747  | 23.257 | Mir6921 & Srebf1        |
| chr17 | 46305389  | 46305555  | 0.01792  | -18.51145 | 17 | 4.6674  | 23.179 | Abcc10                  |
| chr7  | 79722643  | 79723140  | 0.01792  | -18.41666 | 15 | 1.6984  | 20.115 | Plin1                   |
| chr12 | 107967552 | 107967737 | 0.01792  | -18.22835 | 10 | 1.3889  | 19.617 | Bcl11b                  |
| chr13 | 43200119  | 43200412  | 0.01792  | -18.07959 | 12 | 1.189   | 19.269 | Gfod1                   |
| chr8  | 70786454  | 70786698  | 0.01792  | -18.04603 | 17 | 6.9118  | 24.958 | Mast3                   |
| chr10 | 1.21E+08  | 1.21E+08  | 0.01792  | -17.8311  | 17 | 1.4706  | 19.302 | Gns                     |
| chr9  | 21587905  | 21587968  | 0.01792  | -17.78708 | 10 | 3.1448  | 20.932 | Carm1                   |
| chr5  | 36294374  | 36295213  | 0.01792  | -17.76574 | 21 | 0.39683 | 18.163 | Sorcs2                  |
| chr12 | 100941572 | 100942005 | 0.01792  | -17.67081 | 10 | 2.7143  | 20.385 | A630072L19Rik & Ccdc88c |
| chr11 | 1.21E+08  | 1.21E+08  | 0.01792  | -17.4588  | 27 | 8.4524  | 25.911 | Fasn                    |
| chr7  | 45047059  | 45047241  | 0.01792  | -17.45375 | 10 | 3.0952  | 20.549 | Prr12                   |
| chr9  | 68845962  | 68846227  | 0.01792  | -17.39102 | 10 | 7.9167  | 25.308 | Rora                    |
| chr19 | 5454163   | 5454520   | 0.01792  | -17.1786  | 10 | 2.5     | 19.679 | Fosl1                   |
| chr2  | 29996500  | 29996924  | 0.01792  | -17.05357 | 12 | 3.3333  | 20.387 | Sptan1                  |
| chr17 | 56127365  | 56127603  | 0.01792  | -16.92595 | 10 | 0.45455 | 17.381 | Sema6b                  |
| chr15 | 88004302  | 88004634  | 0.01792  | -16.841   | 17 | 2.451   | 19.292 |                         |
| chr17 | 14196872  | 14197088  | 0.01792  | -15.71278 | 12 | 2.0833  | 17.796 | Dact2                   |
| chr6  | 47905158  | 47905205  | 0.01792  | -15.18971 | 12 | 5.8502  | 21.04  | Zfp282                  |
| chr7  | 43442135  | 43442493  | 0.01792  | -14.56142 | 12 | 1.0417  | 15.603 | Cldnd2                  |
| chr11 | 74840329  | 74840697  | 0.01792  | -14.2879  | 10 | 1.1111  | 15.399 | Mnt                     |
| chr5  | 38200955  | 38201134  | 0.01792  | -13.7464  | 10 | 4.1667  | 17.913 | Zbtb49                  |
| chr6  | 1.18E+08  | 1.18E+08  | 0.01792  | -13.746   | 10 | 7.5     | 21.246 |                         |
| chr12 | 84890630  | 84890766  | 0.01792  | -13.574   | 10 | 0.7692  | 14.343 |                         |
| chr12 | 83157996  | 83158040  | 0.01792  | -12.25432 | 10 | 3.6111  | 15.865 | Rgs6                    |
| chr7  | 6677544   | 6678749   | 0.019333 | -18.01968 | 26 | 2.755   | 20.775 | Zim1                    |

|       |           |           |          |           |    |         |        |                  |
|-------|-----------|-----------|----------|-----------|----|---------|--------|------------------|
| chr4  | 48552522  | 48552606  | 0.019334 | -25.84523 | 20 | 5.8333  | 31.679 | Msantd3          |
| chr15 | 98604585  | 98604773  | 0.01971  | -36.60714 | 14 | 3.784   | 40.391 | Adcy6            |
| chr10 | 43511743  | 43512191  | 0.020113 | -14.52020 | 43 | 4.4326  | 18.953 | Bend3            |
| chr13 | 55476542  | 55477087  | 0.020136 | -17.07057 | 14 | 4.9249  | 21.995 | Dbn1             |
| chr9  | 54750418  | 54751192  | 0.020158 | -24.1783  | 14 | 0.5952  | 24.774 |                  |
| chr1  | 135255033 | 135255298 | 0.020163 | -32.40118 | 14 | 0.44643 | 32.848 | Elf3 & Gm26642   |
| chr11 | 115243230 | 115243550 | 0.02024  | -37.15986 | 14 | 1.1905  | 38.35  | Tmem104          |
| chr11 | 1.13E+08  | 1.13E+08  | 0.020276 | -15.1006  | 14 | 5.0765  | 20.177 | Slc39a11         |
| chr8  | 14777981  | 14778370  | 0.020366 | -38.5119  | 14 | 5.4762  | 43.988 | Dlgap2           |
| chr17 | 34781581  | 34782081  | 0.020384 | -40.60387 | 14 | 14.396  | 55     | Tnxa             |
| chr15 | 100482551 | 100482681 | 0.020384 | -19.13385 | 14 | 2.2643  | 21.398 | Csrnp2           |
| chr10 | 62289937  | 62290305  | 0.020416 | -18.68990 | 35 | 2.2302  | 20.92  | Hk1              |
| chr2  | 29217662  | 29218192  | 0.020486 | -14.2746  | 23 | 1.498   | 15.773 | Ntng2            |
| chr6  | 87580668  | 87581411  | 0.020637 | -23.2475  | 23 | 6.8302  | 30.078 | Prokr1           |
| chr15 | 95948459  | 95948656  | 0.020652 | -29.53674 | 23 | 1.9798  | 31.517 | Ano6             |
| chr13 | 92789620  | 92790083  | 0.020853 | -51.8787  | 16 | 21.075  | 72.954 | Thbs4            |
| chr18 | 77356039  | 77357012  | 0.020853 | -23.50405 | 20 | 2.5     | 26.004 | Loxhd1           |
| chrX  | 1.52E+08  | 1.52E+08  | 0.020958 | -16.0198  | 20 | 3.9167  | 19.937 |                  |
| chr8  | 106026016 | 106027020 | 0.021035 | -31.20701 | 18 | 4.0542  | 35.261 | Dus2             |
| chr15 | 86117874  | 86118622  | 0.021035 | -19.8865  | 20 | 1.5417  | 21.428 | Gramd4           |
| chr10 | 80586666  | 80586790  | 0.021035 | -19.4405  | 20 | 0.8333  | 20.274 | Abhd17a          |
| chr4  | 150678487 | 150678874 | 0.021035 | -19.29464 | 20 | 7.0833  | 26.378 | Gm16079          |
| chr3  | 88112723  | 88113262  | 0.021043 | -24.77795 | 20 | 2.7719  | 27.55  | Iqgap3           |
| chr17 | 26275732  | 26276534  | 0.021043 | -19.29647 | 23 | 2.1676  | 21.464 | Luc7l            |
| chr18 | 82729752  | 82729958  | 0.021043 | -12.0841  | 28 | 1.79    | 13.874 |                  |
| chrX  | 141874092 | 141874567 | 0.021057 | -25.92563 | 23 | 1.9082  | 27.834 | Gm15294          |
| chr2  | 166451427 | 166452726 | 0.021064 | -25.07575 | 20 | 3.2986  | 28.374 | 5031425F14Rik    |
| chr7  | 30574772  | 30575578  | 0.021156 | -15.92563 | 23 | 3.3514  | 19.277 | Kmt2b            |
| chr14 | 117652385 | 117652978 | 0.021532 | -47.59672 | 16 | 1.8229  | 49.42  | Gpc6             |
| chr16 | 89867498  | 89867642  | 0.021562 | -29.84668 | 18 | 0.5303  | 30.377 | Tiam1            |
| chr8  | 12178348  | 12178531  | 0.021884 | -22.4764  | 16 | 2.2917  | 24.768 |                  |
| chr11 | 97835901  | 97836188  | 0.0219   | -19.33248 | 28 | 1.1905  | 20.523 | Lasp1            |
| chr13 | 48832015  | 48832301  | 0.022212 | -23.7443  | 18 | 2.7372  | 26.481 | Phf2             |
| chr11 | 67099623  | 67099772  | 0.022212 | -20.08680 | 16 | 2.1875  | 22.274 | Myh3             |
| chr4  | 139417209 | 139417343 | 0.022249 | -43.89012 | 16 | 12.481  | 56.372 | Ubr4             |
| chr3  | 1.43E+08  | 1.43E+08  | 0.022249 | -37.2396  | 16 | 0.625   | 37.865 | Kyat3            |
| chr18 | 10647606  | 10647829  | 0.022249 | -36.64806 | 16 | 2.5347  | 39.183 | Abhd3            |
| chr10 | 1.28E+08  | 1.28E+08  | 0.022284 | -27.1652  | 16 | 2.5     | 29.665 | Zbtb39           |
| chr5  | 38673685  | 38674190  | 0.022365 | -22.40465 | 28 | 1.7503  | 24.155 | Zfp518b          |
| chr2  | 25898426  | 25898781  | 0.022393 | -26.21775 | 16 | 5.2083  | 31.426 | Kcnt1            |
| chr5  | 1.15E+08  | 1.15E+08  | 2.24E-02 | -33.065   | 16 | 6.25    | 39.315 | Hnf1a            |
| chr6  | 1E+08     | 1E+08     | 0.022457 | -29.1592  | 16 | 2.0089  | 31.168 |                  |
| chr5  | 1.16E+08  | 1.16E+08  | 0.022457 | -28.3705  | 16 | 5.1562  | 33.527 | Ccdc60           |
| chr11 | 104290316 | 104290636 | 0.022457 | -26.46205 | 16 | 1.5625  | 28.025 | Mapt             |
| chr2  | 25055734  | 25055947  | 0.022467 | -11.50297 | 16 | 4.1667  | 15.67  | Nsmf             |
| chr9  | 1.18E+08  | 1.18E+08  | 0.022503 | -47.7083  | 16 | 3.2292  | 50.938 |                  |
| chr3  | 89181738  | 89181927  | 0.022503 | -38.43006 | 16 | 7.5893  | 46.019 | Gm16069 & Scamp3 |
| chr19 | 7095133   | 7095281   | 0.022503 | -37.58522 | 16 | 8.6979  | 46.283 | Flrt1 & Macrod1  |
| chr5  | 66890305  | 66890847  | 0.022503 | -35.17485 | 16 | 1.5625  | 36.737 | Gm6517 & Limch1  |
| chr17 | 31591182  | 31591760  | 0.022503 | -35.05494 | 13 | 4.8077  | 39.863 | Pknx1            |
| chr1  | 168109482 | 168110143 | 0.022503 | -32.67237 | 16 | 1.5625  | 34.235 | Gm20711          |
| chr19 | 3268437   | 3268839   | 0.022503 | -30.23897 | 16 | 2.7344  | 32.973 | Ighmbp2          |
| chr17 | 25035555  | 25035915  | 0.022503 | -28.34821 | 16 | 0.78125 | 29.129 | Ift140           |
| chr1  | 82287697  | 82287981  | 0.022503 | -26.59188 | 18 | 3.6065  | 30.198 | Irs1             |
| chr6  | 121220463 | 121220674 | 0.022503 | -26.46722 | 18 | 3.1668  | 29.634 | Tuba8            |
| chrX  | 37210831  | 37211365  | 0.022503 | -24.6993  | 16 | 0.625   | 25.324 | Gm9              |
| chr2  | 1.2E+08   | 1.2E+08   | 0.022503 | -23.8251  | 16 | 4.3056  | 28.131 | Mapkbp1          |

|       |           |           |          |           |    |         |        |                     |
|-------|-----------|-----------|----------|-----------|----|---------|--------|---------------------|
| chr4  | 139666906 | 139667254 | 0.022503 | -23.06592 | 16 | 2.1875  | 25.253 | Tas1r2              |
| chr17 | 66344170  | 66344284  | 0.022503 | -18.67086 | 16 | 0.39062 | 19.061 | Mtcl1               |
| chr2  | 166567207 | 166567827 | 0.022619 | -28.44899 | 24 | 2.7266  | 31.176 | Prex1               |
| chr10 | 69096613  | 69096793  | 0.023293 | -29.59124 | 13 | 1.9231  | 31.514 | Gm47107             |
| chr5  | 134990654 | 134990810 | 0.023379 | -28.16239 | 13 | 0.64103 | 28.803 | Wbscr25             |
| chr2  | 1.63E+08  | 1.63E+08  | 0.023397 | -34.1026  | 13 | 3.8462  | 37.949 | Jph2                |
| chr5  | 35701771  | 35702046  | 0.023451 | -32.76848 | 13 | 8.4266  | 41.195 | Sh3tc1              |
| chr10 | 63116885  | 63116980  | 0.02353  | -31.95054 | 13 | 0.54945 | 32.5   | Mypn                |
| chr15 | 78828086  | 78828214  | 0.023603 | -32.002   | 13 | 2.4946  | 34.497 |                     |
| chr8  | 123193935 | 123194208 | 0.023744 | -31.30341 | 13 | 0.64103 | 31.944 | Dpep1 & Gm20388     |
| chr3  | 1.08E+08  | 1.08E+08  | 0.02381  | -39.7299  | 13 | 2.5641  | 42.294 | Sars                |
| chr4  | 149649791 | 149649939 | 0.02381  | -15.99640 | 13 | 3.4615  | 19.458 | Pik3cd              |
| chr2  | 122075226 | 122075716 | 0.023911 | -21.82997 | 13 | 4.3956  | 26.226 | Spg11               |
| chr10 | 79912411  | 79912458  | 0.023932 | -29.02319 | 13 | 6.9658  | 35.989 | R3hdm4              |
| chr9  | 107288117 | 107288449 | 0.024035 | -27.35357 | 13 | 3.0112  | 30.365 | Mapkapk3            |
| chr7  | 24698979  | 24699280  | 0.024037 | -33.6538  | 13 | 0.9615  | 34.615 |                     |
| chr1  | 136219809 | 136219984 | 0.024037 | -30.70818 | 13 | 1.3355  | 32.044 | Inava & Gm26568     |
| chr2  | 30330714  | 30331488  | 0.02405  | -16.5917  | 13 | 1.9231  | 18.515 | Nup188              |
| chr2  | 93875837  | 93876241  | 0.024138 | -37.9258  | 13 | 2.5641  | 40.49  |                     |
| chr6  | 39769485  | 39770158  | 0.024138 | -28.4585  | 13 | 1.9643  | 30.423 |                     |
| chr6  | 121654417 | 121654597 | 0.024141 | -49.20940 | 13 | 8.6538  | 57.863 | A2m                 |
| chr4  | 128998271 | 128998337 | 0.024141 | -42.14285 | 13 | 0.54945 | 42.692 | Ak2                 |
| chr6  | 89323118  | 89323671  | 0.024466 | -32.53590 | 21 | 1.3983  | 33.934 | Gm26811 & plexin A1 |
| chr4  | 118142204 | 118142609 | 0.024772 | -19.74927 | 22 | 8.1494  | 27.899 | Kdm4a               |
| chr11 | 95023322  | 95023864  | 0.024931 | -18.88650 | 25 | 2.7333  | 21.62  | Samd14              |
| chr5  | 1.39E+08  | 1.39E+08  | 0.025052 | -16.3889  | 15 | 4.1111  | 20.5   |                     |
| chr7  | 37346697  | 37347718  | 0.025269 | -31.5836  | 25 | 2.3056  | 33.889 |                     |
| chr10 | 1.17E+08  | 1.17E+08  | 0.025369 | -31.8333  | 15 | 3.3333  | 35.167 |                     |
| chr15 | 98378627  | 98378957  | 2.62E-02 | -21.105   | 15 | 1.1111  | 22.216 | Olfr283             |
| chr15 | 52125402  | 52125480  | 0.02675  | -52.7778  | 12 | 28.819  | 81.597 |                     |
| chr4  | 130774438 | 130774589 | 0.02675  | -38.05916 | 15 | 1.6984  | 39.758 | Pum1                |
| chr15 | 1.01E+08  | 1.01E+08  | 0.026908 | -25.3677  | 15 | 3.8333  | 29.201 | Acvr1b              |
| chr15 | 74898116  | 74898349  | 0.026996 | -27.5731  | 19 | 0.8772  | 28.45  |                     |
| chr7  | 44597827  | 44598570  | 0.026996 | -17.20214 | 15 | 4.3704  | 21.573 | Kcnc3               |
| chr11 | 59557738  | 59558670  | 0.027012 | -27.1329  | 12 | 0.9375  | 28.07  | Nlrp3               |
| chr7  | 127489801 | 127489928 | 0.027059 | -45.55555 | 15 | 6.5     | 52.056 | Fbrs                |
| chr11 | 117818848 | 117819150 | 0.027108 | -26.16137 | 15 | 2.254   | 28.415 | Tk1 & Gm20708       |
| chr2  | 1.73E+08  | 1.73E+08  | 0.027327 | -29.4707  | 12 | 4.9555  | 34.426 |                     |
| chr8  | 84211956  | 84212128  | 0.027327 | -25.60185 | 15 | 0.95238 | 26.554 | Zswim4              |
| chr4  | 1.33E+08  | 1.33E+08  | 0.027437 | -37.2407  | 15 | 2.8889  | 40.13  | Themis2             |
| chr1  | 184912574 | 184912773 | 0.027451 | -25.95238 | 15 | 1.3889  | 27.341 | Mark1               |
| chr7  | 49362105  | 49362433  | 0.027543 | -21.33068 | 15 | 1.6667  | 22.997 | Nav2                |
| chr8  | 114781305 | 114781899 | 0.027582 | -24.77777 | 15 | 1.1111  | 25.889 | Wwox                |
| chr13 | 57787077  | 57787551  | 0.027622 | -34.373   | 15 | 3.3333  | 37.706 | Spock1              |
| chr12 | 1.07E+08  | 1.07E+08  | 0.027622 | -33.8591  | 12 | 4.7917  | 38.651 |                     |
| chr7  | 45532707  | 45533216  | 0.027622 | -31.30952 | 15 | 6.6111  | 37.921 | Plekha4             |
| chr8  | 95577696  | 95577929  | 0.027622 | -30.8218  | 12 | 7.6042  | 38.426 | Gm5912              |
| chr6  | 124728748 | 124729201 | 0.027622 | -29.08465 | 15 | 4.6667  | 33.751 | Ptpn6               |
| chr4  | 63136916  | 63137242  | 0.027622 | -28.08441 | 22 | 2.5433  | 30.628 | Zfp618              |
| chr8  | 110731603 | 110732119 | 0.027622 | -23.31210 | 22 | 6.1387  | 29.451 | Mtss1l              |
| chr11 | 1.15E+08  | 1.15E+08  | 0.027622 | -20.9209  | 15 | 1.3889  | 22.31  | Rab37 & Cd300lf     |
| chr5  | 134503197 | 134503316 | 0.027636 | -19.48687 | 15 | 2.8889  | 22.376 | Clip2               |
| chr1  | 36795052  | 36795365  | 0.027648 | -50.34722 | 12 | 4.2063  | 54.554 | Tmem131             |
| chr17 | 26213286  | 26213526  | 0.027723 | -22.84547 | 15 | 1.5278  | 24.373 | Fam234a             |
| chr15 | 98843957  | 98844571  | 0.027723 | -17.35269 | 15 | 0.89286 | 18.246 | Kmt2d               |
| chr1  | 7178210   | 7178917   | 0.027754 | -54       | 15 | 2.7778  | 56.778 | Gm9826              |

|       |           |           |          |           |    |         |        |                                         |
|-------|-----------|-----------|----------|-----------|----|---------|--------|-----------------------------------------|
| chr17 | 7255299   | 7255623   | 0.027754 | -48.4028  | 12 | 5.8333  | 54.236 | Rps6ka2                                 |
| chr5  | 1.43E+08  | 1.43E+08  | 0.027754 | -37.5694  | 12 | 10.764  | 48.333 | Zfp12                                   |
| chr6  | 121040440 | 121040556 | 0.027754 | -35.45634 | 12 | 1.6369  | 37.093 | Mical3                                  |
| chr3  | 89359164  | 89359651  | 0.027754 | -35.41997 | 12 | 1.8254  | 37.245 | Dcst1                                   |
| chr2  | 181207664 | 181208248 | 0.027754 | -35.24603 | 15 | 1.8095  | 37.056 | Srms                                    |
| chr4  | 1.49E+08  | 1.49E+08  | 0.027754 | -33.1944  | 12 | 3.4722  | 36.667 | Kif1b                                   |
| chr5  | 34001056  | 34001216  | 0.027754 | -33.16919 | 22 | 3.355   | 36.524 | Nat8l                                   |
| chr8  | 8520580   | 8520717   | 0.027754 | -30.8333  | 15 | 1.6667  | 32.5   |                                         |
| chr2  | 29179697  | 29180215  | 0.027754 | -30.7976  | 15 | 4.119   | 34.917 | Setx                                    |
| chr12 | 81718208  | 81718607  | 0.027754 | -30.53968 | 15 | 10.667  | 41.206 | AC125351.1                              |
| chr7  | 25157346  | 25157502  | 0.027754 | -30.41666 | 12 | 3.6111  | 34.028 | Pou2f2                                  |
| chr17 | 65679895  | 65680391  | 0.027754 | -28.2143  | 12 | 2.0833  | 30.298 | Rab31                                   |
| chr17 | 30803342  | 30803526  | 2.78E-02 | -27.5907  | 22 | 5.6331  | 33.224 | Dnah8                                   |
| chr17 | 71675109  | 71675192  | 0.027754 | -27.35389 | 15 | 6.9444  | 34.298 | Togaram2                                |
| chr19 | 5761448   | 5761721   | 0.027754 | -23.4937  | 12 | 3.6111  | 27.105 | Scyl1                                   |
| chr6  | 91056805  | 91057463  | 0.027754 | -22.40608 | 15 | 6.5317  | 28.938 | Nup210                                  |
| chr3  | 152555289 | 152555424 | 0.027754 | -22.19576 | 12 | 3.3598  | 25.556 | Ak5                                     |
| chr11 | 18603753  | 18603950  | 0.027754 | -16.10101 | 15 | 3.3333  | 19.434 | Gm12023                                 |
| chr8  | 1.23E+08  | 1.23E+08  | 0.027754 | -15.6641  | 15 | 5.2778  | 20.942 | Galns & Gm20388                         |
| chr7  | 38188683  | 38188971  | 0.027754 | -14.99518 | 12 | 7.4097  | 22.405 | D530033B14Rik & 1600014C10Rik           |
| chr12 | 111810827 | 111810958 | 0.027754 | -10.02381 | 15 | 2.4444  | 12.468 | Xrcc3                                   |
| chr6  | 125758294 | 125758728 | 0.027758 | -28.11904 | 15 | 2.1429  | 30.262 | Ano2                                    |
| chr19 | 47267631  | 47267797  | 0.028396 | -28.35901 | 17 | 8.6928  | 37.052 | Sh3pxd2a                                |
| chr12 | 59491748  | 59492092  | 0.029823 | -31.5584  | 11 | 0.7576  | 32.316 |                                         |
| chr3  | 52600880  | 52601422  | 0.031001 | -28.1042  | 20 | 8.0923  | 36.196 |                                         |
| chr1  | 87210276  | 87210674  | 0.031087 | -20.0516  | 20 | 2.375   | 22.427 | Chrng                                   |
| chr11 | 1.18E+08  | 1.18E+08  | 0.031229 | -48.9177  | 11 | 3.3333  | 52.251 | Timp2                                   |
| chr1  | 1.82E+08  | 1.82E+08  | 0.031236 | -23.5479  | 11 | 0.5051  | 24.053 |                                         |
| chr19 | 6481461   | 6481541   | 0.031738 | -35.06673 | 11 | 1.5152  | 36.582 | Nrxn2                                   |
| chr12 | 8952352   | 8952667   | 0.031738 | -28.24288 | 14 | 6.746   | 34.989 | Matn3                                   |
| chr3  | 65613596  | 65614047  | 0.031738 | -27.1645  | 11 | 1.4069  | 28.571 | Gm5847                                  |
| chr7  | 44844083  | 44844335  | 0.031797 | -18.57599 | 24 | 2.2859  | 20.862 | Tbc1d17                                 |
| chr2  | 25441404  | 25441448  | 0.031827 | -23.34901 | 11 | 10.813  | 34.163 | Abca2                                   |
| chr9  | 47268908  | 47268995  | 0.031941 | -71.90476 | 10 | 8.0952  | 80     | Gm31816                                 |
| chr19 | 23675705  | 23675915  | 0.031941 | -71.25000 | 10 | 6.25    | 77.5   | Gm6563                                  |
| chr14 | 17884818  | 17885026  | 0.031941 | -69.83333 | 10 | 1       | 70.833 | Gm24140 & thyroid hormone receptor beta |
| chr14 | 121336343 | 121336997 | 0.031941 | -62.52381 | 10 | 1.6667  | 64.19  | Stk24                                   |
| chr18 | 90294692  | 90294986  | 0.031941 | -60.5032  | 10 | 10.512  | 71.015 |                                         |
| chr1  | 161241585 | 161241813 | 0.031941 | -56.91666 | 10 | 11.417  | 68.333 | Prdx6                                   |
| chrX  | 103551402 | 103551629 | 0.031941 | -54.66666 | 10 | 3.3333  | 58     | Jpx                                     |
| chr7  | 27537505  | 27537659  | 0.031941 | -53.25595 | 10 | 4.9583  | 58.214 | Pld3                                    |
| chr12 | 1.11E+08  | 1.11E+08  | 0.031941 | -50.9762  | 10 | 3.3333  | 54.31  | Cdc42bpb                                |
| chr3  | 83304888  | 83305050  | 0.031941 | -49.95833 | 10 | 0.625   | 50.583 | Dchs2                                   |
| chr16 | 13424509  | 13424751  | 0.031941 | -49.59523 | 10 | 1       | 50.595 | Gm15738                                 |
| chr18 | 78069752  | 78069907  | 0.031941 | -49.1667  | 10 | 2.5     | 51.667 |                                         |
| chr5  | 130906106 | 130906243 | 0.031941 | -49.04166 | 10 | 2.2917  | 51.333 | Galnt17                                 |
| chr6  | 85219929  | 85220077  | 0.031941 | -48.31313 | 10 | 0.90909 | 49.222 | Sfxn5                                   |
| chr11 | 98579195  | 98579405  | 0.031941 | -47.9048  | 10 | 3.6667  | 51.571 |                                         |
| chr17 | 46980600  | 46980708  | 0.031941 | -47.41666 | 10 | 11.75   | 59.167 | Ubr2                                    |
| chr13 | 45593629  | 45593767  | 0.031941 | -46.50000 | 10 | 4.3333  | 50.833 | Atxn1                                   |
| chr2  | 127755337 | 127755662 | 0.031941 | -45.88095 | 10 | 5.7143  | 51.595 | Nphp1                                   |
| chr5  | 112862377 | 112862484 | 0.031941 | -45.81349 | 10 | 6.2698  | 52.083 | Myo18b                                  |
| chr6  | 37610507  | 37610658  | 0.031941 | -45.8078  | 14 | 5.2976  | 51.105 |                                         |
| chr5  | 148028376 | 148028667 | 0.031941 | -45.75000 | 10 | 5       | 50.75  | Mtus2                                   |
| chr17 | 7655553   | 7655861   | 0.031941 | -45.69642 | 10 | 2.6667  | 48.363 | AC119998.5                              |

|       |           |           |          |           |    |         |        |                                                  |
|-------|-----------|-----------|----------|-----------|----|---------|--------|--------------------------------------------------|
| chrUn | 7617      | 7728      | 0.031941 | -45.6667  | 10 | 1.8333  | 47.5   |                                                  |
| chr11 | 1.04E+08  | 1.04E+08  | 0.031941 | -45.3651  | 10 | 1       | 46.365 | Crhr1                                            |
| chr10 | 78284916  | 78285131  | 0.031941 | -45.10714 | 10 | 9.2262  | 54.333 | Agpat3                                           |
| chr7  | 98098110  | 98098252  | 0.031941 | -44.5357  | 10 | 5       | 49.536 | Myo7a                                            |
| chr19 | 46887207  | 46887520  | 0.031941 | -44.4306  | 10 | 1       | 45.431 | Nt5c2                                            |
| chr10 | 75927350  | 75927450  | 0.031941 | -43.51190 | 10 | 3.75    | 47.262 | Mmp11                                            |
| chr7  | 1.18E+08  | 1.18E+08  | 0.031941 | -42.6964  | 10 | 9.4702  | 52.167 |                                                  |
| chr16 | 19036087  | 19036313  | 0.031941 | -42.5556  | 10 | 2.9861  | 45.542 |                                                  |
| chr11 | 1.2E+08   | 1.2E+08   | 0.031941 | -41.4762  | 10 | 3.3929  | 44.869 |                                                  |
| chr3  | 94453585  | 94453940  | 0.031941 | -41.2381  | 10 | 1.4286  | 42.667 | Gm30023                                          |
| chr2  | 173008121 | 173008573 | 0.031941 | -40.72023 | 10 | 0.625   | 41.345 | Rae1                                             |
|       |           |           |          |           |    |         |        | Gm49460 & trafficking protein particle complex 9 |
| chr15 | 72590736  | 72590784  | 0.031941 | -40       | 10 | 3.75    | 43.75  |                                                  |
| chr10 | 121868761 | 121869029 | 0.031941 | -39.08333 | 10 | 1.25    | 40.333 | Srgap1                                           |
| chr13 | 96748460  | 96748575  | 0.031941 | -38.88095 | 10 | 2.7143  | 41.595 | Ankrd31                                          |
| chr16 | 20529118  | 20529297  | 0.031941 | -38.75    | 10 | 1.8333  | 40.583 | Dvl3                                             |
| chr5  | 1.14E+08  | 1.14E+08  | 0.031941 | -38.6429  | 10 | 1.6667  | 40.31  |                                                  |
| chr16 | 52102259  | 52102708  | 0.031941 | -38.25    | 10 | 8.4167  | 46.667 | Cblb                                             |
| chr12 | 1.07E+08  | 1.07E+08  | 0.031941 | -38.1548  | 10 | 6.8452  | 45     |                                                  |
| chr6  | 85933227  | 85933390  | 0.031941 | -37.80952 | 10 | 1.6667  | 39.476 | Nat8b-ps                                         |
|       |           |           |          |           |    |         |        | Gm13267 & Dhtkd1                                 |
| chr2  | 5897917   | 5898047   | 0.031941 | -37.6151  | 10 | 3.875   | 41.49  |                                                  |
| chr17 | 28902980  | 28903296  | 0.031941 | -37.31547 | 10 | 2.7917  | 40.107 | 4930539E08Rik                                    |
| chr4  | 131849157 | 131849267 | 0.031941 | -37.21428 | 10 | 4.3333  | 41.548 | Mecr                                             |
| chr5  | 115894399 | 115894952 | 0.031941 | -37.05952 | 10 | 7.8333  | 44.893 | Cit                                              |
| chr3  | 98826433  | 98826852  | 0.031941 | -35.9867  | 14 | 0.7143  | 36.701 |                                                  |
| chr15 | 96381874  | 96382342  | 0.031941 | -35.87963 | 18 | 6.0185  | 41.898 | Arid2                                            |
| chr2  | 1.58E+08  | 1.58E+08  | 0.031941 | -35.7483  | 14 | 4.1667  | 39.915 |                                                  |
| chr7  | 34284856  | 34285023  | 0.031941 | -35.62139 | 10 | 3.9583  | 39.58  | 4931406P16Rik                                    |
| chr17 | 78333872  | 78334533  | 0.031941 | -35.58333 | 10 | 0.83333 | 36.417 | Crim1                                            |
| chr1  | 77975884  | 77976060  | 0.031941 | -35.3038  | 10 | 5.6627  | 40.966 |                                                  |
| chr8  | 1.18E+08  | 1.18E+08  | 0.031941 | -35.0595  | 14 | 10.714  | 45.774 |                                                  |
| chr9  | 1.16E+08  | 1.16E+08  | 0.031941 | -35.0468  | 14 | 1.2245  | 36.271 |                                                  |
| chr6  | 137513901 | 137514046 | 0.031941 | -34.42857 | 10 | 4.9286  | 39.357 | Eps8                                             |
| chr19 | 5763431   | 5763698   | 0.031941 | -34.23015 | 10 | 2.4444  | 36.675 | Scyl1                                            |
| chr3  | 95320697  | 95321014  | 0.031941 | -34.20400 | 10 | 2.4286  | 36.633 | Cers2                                            |
| chr2  | 172912217 | 172912430 | 0.031941 | -33.65705 | 10 | 4.4918  | 38.149 | Bmp7                                             |
| chr1  | 1.8E+08   | 1.8E+08   | 0.031941 | -33.6513  | 10 | 2.6591  | 36.31  | Cdc42bpa                                         |
| chr14 | 51255405  | 51255677  | 0.031941 | -33.4087  | 10 | 3       | 36.409 | Rnase2a                                          |
| chr7  | 1.28E+08  | 1.28E+08  | 0.031941 | -32.7785  | 10 | 6.5952  | 39.374 | Zfp646                                           |
| chr7  | 141634001 | 141634471 | 0.031941 | -32.58503 | 14 | 5.0595  | 37.645 | Muc6                                             |
| chr11 | 1.01E+08  | 1.01E+08  | 0.031941 | -32.3452  | 10 | 8.4167  | 40.762 | Ghdc                                             |
| chr14 | 25806369  | 25806631  | 0.031941 | -32.1429  | 10 | 0.8333  | 32.976 |                                                  |
| chr11 | 50156967  | 50157020  | 0.031941 | -32.04960 | 10 | 3.6667  | 35.716 | Tbc1d9b                                          |
| chr4  | 44984351  | 44984451  | 0.031941 | -31.73809 | 10 | 4.5     | 36.238 | Grhpr                                            |
| chr6  | 97647780  | 97647858  | 0.031941 | -31.1411  | 10 | 10.526  | 41.667 |                                                  |
| chr9  | 108045579 | 108045704 | 0.031941 | -31.08333 | 10 | 2       | 33.083 | lp6k1                                            |
| chr11 | 1.03E+08  | 1.03E+08  | 0.031941 | -31.0099  | 10 | 1.1806  | 32.19  | Plekhm1                                          |
| chr10 | 128949890 | 128950069 | 0.031941 | -31.00058 | 10 | 3.8474  | 34.848 | Itga7                                            |
| chr4  | 148932824 | 148932970 | 0.031941 | -30.93614 | 14 | 1.3095  | 32.246 | Cas21                                            |
| chr7  | 30765796  | 30766135  | 0.031941 | -30.91666 | 10 | 2.1032  | 33.02  | Dmkn                                             |
| chr17 | 31348107  | 31348458  | 0.031941 | -30.88888 | 10 | 0.625   | 31.514 | Slc37a1                                          |
| chr14 | 1.22E+08  | 1.22E+08  | 0.031941 | -30.7473  | 14 | 3.9626  | 34.71  | Dock9                                            |
| chr15 | 37346655  | 37346948  | 0.031941 | -30.70238 | 10 | 1.25    | 31.952 | Grhl2                                            |
| chr5  | 115545958 | 115546134 | 0.031941 | -30.67261 | 10 | 0.625   | 31.298 | Pxn                                              |
| chr17 | 45539396  | 45539757  | 0.031941 | -30.00948 | 14 | 4.1618  | 34.171 | Tcte1                                            |

|       |           |           |          |           |    |         |        |                                                                                                                                                    |
|-------|-----------|-----------|----------|-----------|----|---------|--------|----------------------------------------------------------------------------------------------------------------------------------------------------|
|       |           |           |          |           |    |         |        | Gm22136 & ST6<br>(alpha-N-acetyl-<br>neuraminy-2,3-<br>beta-galactosyl-<br>1,3)-N-<br>acetylgalactosami-<br>nide alpha-2,6-<br>sialyltransferase 3 |
| chr3  | 1.54E+08  | 1.54E+08  | 0.031941 | -30       | 10 | 3.25    | 33.25  |                                                                                                                                                    |
| chr2  | 103722622 | 103723227 | 0.031941 | -29.84127 | 10 | 8.5278  | 38.369 | Nat10                                                                                                                                              |
| chr5  | 1.4E+08   | 1.4E+08   | 0.031941 | -29.4464  | 10 | 3       | 32.446 |                                                                                                                                                    |
| chr5  | 140628256 | 140628696 | 0.031941 | -29.37500 | 10 | 8.6667  | 38.042 | Ttyh3                                                                                                                                              |
| chr10 | 80520400  | 80520522  | 0.031941 | -29.0136  | 14 | 0.8929  | 29.906 | Atp8b3                                                                                                                                             |
| chr6  | 1.25E+08  | 1.25E+08  | 0.031941 | -28.9711  | 14 | 0.7143  | 29.685 | Ptpn6                                                                                                                                              |
| chr6  | 1.16E+08  | 1.16E+08  | 0.031941 | -28.2882  | 21 | 6.7442  | 35.032 | Rho                                                                                                                                                |
| chr6  | 91679216  | 91679515  | 0.031941 | -28.16774 | 10 | 2.5     | 30.668 | Gm45217                                                                                                                                            |
| chr8  | 1.17E+08  | 1.17E+08  | 0.031941 | -28.1593  | 10 | 4.6032  | 32.762 | Cmip                                                                                                                                               |
| chr10 | 79829807  | 79830151  | 0.031941 | -28.11111 | 10 | 6.7698  | 34.881 | Misp                                                                                                                                               |
| chr2  | 168098684 | 168098767 | 0.031941 | -27.87554 | 10 | 1.5556  | 29.431 | Pard6b                                                                                                                                             |
| chr2  | 181411932 | 181412149 | 0.031941 | -27.58531 | 10 | 2.2917  | 29.877 | Zbtb46                                                                                                                                             |
| chr4  | 116050900 | 116051422 | 0.031941 | -27.45634 | 10 | 0.55556 | 28.012 | Nsun4                                                                                                                                              |
| chr1  | 163939764 | 163940094 | 0.031941 | -27.36819 | 14 | 5.6122  | 32.98  | Scyl3                                                                                                                                              |
| chr5  | 35948111  | 35948194  | 0.031941 | -27.3633  | 10 | 2.5     | 29.863 | Afap1                                                                                                                                              |
| chr12 | 91538044  | 91538203  | 0.031941 | -27.30158 | 10 | 4.3651  | 31.667 | Tshr                                                                                                                                               |
| chr17 | 46721795  | 46721868  | 0.031941 | -27.12159 | 14 | 2.5     | 29.622 | Pex6 & Gm26904                                                                                                                                     |
| chr15 | 101736430 | 101736744 | 0.031941 | -26.66062 | 20 | 2.8959  | 29.557 | Krt71                                                                                                                                              |
| chr7  | 80312948  | 80313264  | 0.031941 | -26.6369  | 10 | 5.625   | 32.262 | Rccd1 & Prc1                                                                                                                                       |
| chr14 | 30307593  | 30307988  | 0.031941 | -26.54478 | 14 | 7.1429  | 33.688 | Cacna1d                                                                                                                                            |
|       |           |           |          |           |    |         |        | Gm26770 &<br>RAD9-HUS1-<br>RAD1 interacting<br>nuclear orphan 1                                                                                    |
| chr6  | 1.28E+08  | 1.28E+08  | 0.031941 | -26.5357  | 10 | 3.6786  | 30.214 |                                                                                                                                                    |
| chr7  | 46166949  | 46167115  | 0.031941 | -26.39087 | 10 | 4.4821  | 30.873 | Abcc8                                                                                                                                              |
| chr9  | 119348211 | 119348700 | 0.031941 | -26.39030 | 14 | 0.71429 | 27.105 | Acaa1a &<br>Slc22a14                                                                                                                               |
| chr8  | 121564770 | 121565078 | 0.031941 | -26.37755 | 14 | 0.89286 | 27.27  | Fbxo31 &<br>Gm20388                                                                                                                                |
| chr13 | 54733556  | 54733831  | 0.031941 | -26.36904 | 14 | 5.9666  | 32.336 | Cdhr2                                                                                                                                              |
| chr1  | 1.29E+08  | 1.29E+08  | 0.031941 | -26.3571  | 10 | 9       | 35.357 |                                                                                                                                                    |
| chr12 | 107949686 | 107950039 | 0.031941 | -26.35317 | 10 | 2.2222  | 28.575 | Bcl11b                                                                                                                                             |
| chr4  | 130011549 | 130011892 | 0.031941 | -25.38770 | 14 | 1.4286  | 26.816 | Adgrb2                                                                                                                                             |
| chr5  | 35627594  | 35627762  | 0.031941 | -25.2262  | 10 | 0.625   | 25.851 |                                                                                                                                                    |
| chr12 | 1.13E+08  | 1.13E+08  | 0.031941 | -25.1392  | 10 | 5       | 30.139 | Inf2                                                                                                                                               |
| chr2  | 160908220 | 160908357 | 0.031941 | -25.03282 | 10 | 5.6905  | 30.723 | Emilin3                                                                                                                                            |
| chr10 | 75976437  | 75976601  | 0.031941 | -25.0278  | 10 | 1.2698  | 26.298 | Gm5134                                                                                                                                             |
| chr9  | 98437509  | 98437834  | 0.031941 | -24.91071 | 10 | 3.25    | 28.161 | Rbp1                                                                                                                                               |
| chr10 | 127705345 | 127705754 | 0.031941 | -24.86111 | 10 | 1.2698  | 26.131 | Myo1a                                                                                                                                              |
| chr9  | 65556618  | 65557099  | 0.031941 | -24.83080 | 10 | 0.83333 | 25.664 | Plekho2                                                                                                                                            |
| chr6  | 90671975  | 90672109  | 0.031941 | -24.80952 | 20 | 0.35714 | 25.167 | lqsec1                                                                                                                                             |
| chr15 | 84693679  | 84693914  | 0.031941 | -24.51677 | 10 | 4.2123  | 28.729 | Prr5                                                                                                                                               |
| chr5  | 123816815 | 123817059 | 0.031941 | -24.25000 | 10 | 8       | 32.25  | Kntc1                                                                                                                                              |
| chr11 | 77505444  | 77505590  | 0.031941 | -24.1752  | 14 | 1.7857  | 25.961 | Git1                                                                                                                                               |
| chr16 | 13611978  | 13613113  | 0.031941 | -24.1355  | 14 | 2.9266  | 27.062 | Parn                                                                                                                                               |
| chr10 | 81080578  | 81080727  | 0.031941 | -23.65955 | 14 | 4.5238  | 28.183 | Thop1                                                                                                                                              |
| chrX  | 94150197  | 94150689  | 0.031941 | -23.5714  | 14 | 7.1429  | 30.714 |                                                                                                                                                    |
| chr7  | 1.18E+08  | 1.18E+08  | 0.031941 | -23.4638  | 14 | 0.8929  | 24.357 | Xylt1                                                                                                                                              |
| chr5  | 120128271 | 120128579 | 0.031941 | -23.03246 | 10 | 4.5833  | 27.616 | Gm10390 &<br>Rbm19                                                                                                                                 |
| chr8  | 14761337  | 14761571  | 0.031941 | -23.01190 | 10 | 0.625   | 23.637 | Dlgap2                                                                                                                                             |

|       |           |           |          |           |    |         |        |                                                                         |
|-------|-----------|-----------|----------|-----------|----|---------|--------|-------------------------------------------------------------------------|
| chr2  | 174644962 | 174645169 | 0.031941 | -22.66156 | 14 | 0.71429 | 23.376 | Zfp831                                                                  |
| chr17 | 25825667  | 25825765  | 0.031941 | -22.33333 | 10 | 1.3333  | 23.667 | Wdr24 & Gm26694                                                         |
| chr6  | 83296342  | 83296654  | 0.031941 | -22.1429  | 10 | 4.3333  | 26.476 | Slc4a5                                                                  |
| chr5  | 142884752 | 142885473 | 0.031941 | -21.68792 | 14 | 2.877   | 24.565 | Fbxl18                                                                  |
| chr10 | 62271534  | 62271708  | 0.031941 | -21.68367 | 14 | 3.869   | 25.553 | Hk1                                                                     |
| chr3  | 59430075  | 59430694  | 0.031941 | -21.6     | 14 | 1.1905  | 22.79  |                                                                         |
| chr9  | 121110321 | 121110551 | 0.031941 | -21.20021 | 10 | 6.2266  | 27.427 | Ulk4                                                                    |
| chr5  | 24648373  | 24648612  | 0.031941 | -20.85546 | 14 | 1.8132  | 22.669 | 1700022A21Rik                                                           |
| chr5  | 122247512 | 122247737 | 0.031941 | -20.39357 | 10 | 4.3333  | 24.727 | Tctn1                                                                   |
| chr11 | 1.19E+08  | 1.19E+08  | 0.031941 | -20.375   | 10 | 1.625   | 22     | Rbfox3                                                                  |
| chr7  | 1.24E+08  | 1.24E+08  | 0.031941 | -19.9982  | 10 | 11.269  | 31.267 |                                                                         |
| chr7  | 44209507  | 44209714  | 0.031941 | -19.85191 | 10 | 3.6806  | 23.532 | Klk1b4                                                                  |
| chr2  | 1.59E+08  | 1.59E+08  | 0.031941 | -19.5629  | 18 | 2.4109  | 21.974 | Ppp1r16b                                                                |
| chr17 | 85065691  | 85065768  | 0.031941 | -19.55573 | 10 | 6.1448  | 25.701 | Prepl                                                                   |
| chr12 | 90332161  | 90332240  | 0.031941 | -18.53968 | 10 | 0.71429 | 19.254 | Nrxn3                                                                   |
| chr3  | 68787770  | 68788069  | 0.031941 | -18.0782  | 14 | 0.5952  | 18.673 |                                                                         |
| chr2  | 168754592 | 168754742 | 0.031941 | -17.94501 | 14 | 1.4881  | 19.433 | Sall4                                                                   |
| chr14 | 57036550  | 57036725  | 0.031941 | -17.89614 | 24 | 1.3021  | 19.198 | Gja3                                                                    |
| chr19 | 8549543   | 8549917   | 0.031941 | -17.5099  | 10 | 9.4048  | 26.915 |                                                                         |
| chr17 | 24595221  | 24595664  | 0.031941 | -17.38780 | 10 | 6.4683  | 23.856 | Pkd1                                                                    |
| chr5  | 125496511 | 125497133 | 0.031941 | -17.10446 | 14 | 0.32468 | 17.429 | Aacs                                                                    |
| chr11 | 99145583  | 99145634  | 0.031941 | -16.9351  | 10 | 4.1071  | 21.042 | Ccr7                                                                    |
| chr8  | 125807984 | 125808204 | 0.031941 | -16.10119 | 14 | 3.5714  | 19.673 | Pcnx2                                                                   |
| chr13 | 48806699  | 48808039  | 0.031941 | -16.0995  | 24 | 7.0817  | 23.181 | Phf2                                                                    |
| chr15 | 98650807  | 98651022  | 0.031941 | -14.17225 | 10 | 1.9091  | 16.081 | Ddx23                                                                   |
| chr19 | 56847614  | 56848047  | 0.031941 | -12.91591 | 10 | 3.5     | 16.416 | Tdrd1                                                                   |
| chr8  | 121554255 | 121554299 | 0.031941 | -12.68011 | 14 | 2.0833  | 14.763 | Fbxo31 & Gm20388                                                        |
| chr15 | 79034791  | 79035834  | 0.031941 | -12.37381 | 24 | 1.5418  | 13.916 | Gcat & Gcat                                                             |
| chr5  | 125149139 | 125149294 | 0.031941 | -12.27782 | 14 | 1.7857  | 14.064 | Ncor2                                                                   |
| chr4  | 1.19E+08  | 1.19E+08  | 0.031941 | -7.68948  | 14 | 6.5795  | 14.269 |                                                                         |
| chr13 | 37510492  | 37511199  | 0.031952 | -28.2596  | 14 | 1.7857  | 30.045 | Gm29590                                                                 |
| chr8  | 1.23E+08  | 1.23E+08  | 0.031956 | -31.8027  | 14 | 3.7925  | 35.595 | Gm20388 & CBFA2/RUNX1 translocation partner 3                           |
| chr7  | 110802533 | 110802957 | 0.031976 | -34.71119 | 18 | 5.0132  | 39.724 | Gm47282 & adenosine monophosphate deaminase 3 & ring finger protein 141 |
| chr8  | 121510380 | 121510579 | 0.031979 | -22.99358 | 14 | 0.59524 | 23.589 | Gm20388                                                                 |
| chr10 | 80787119  | 80787981  | 0.031993 | -40.18319 | 14 | 1.3095  | 41.493 | Dot1l                                                                   |
| chr18 | 46932357  | 46932452  | 0.031993 | -23.5884  | 14 | 7.7041  | 31.293 | Arl14epl                                                                |
| chr4  | 134898448 | 134898692 | 0.031993 | -21.29251 | 14 | 0.89286 | 22.185 | Tmem50a                                                                 |
| chr2  | 31816539  | 31816804  | 0.032142 | -17.83559 | 18 | 2.1605  | 19.996 | Fibcd1                                                                  |
| chr1  | 1.54E+08  | 1.54E+08  | 0.032186 | -26.9279  | 18 | 4.6373  | 31.565 | Npl                                                                     |
| chr15 | 86108113  | 86108601  | 0.032308 | -32.93049 | 18 | 4.1777  | 37.108 | Gramd4                                                                  |
| chr7  | 99344050  | 99344712  | 0.032372 | -22.672   | 18 | 1.8783  | 24.55  |                                                                         |
| chr1  | 86305101  | 86305374  | 0.032626 | -17.58597 | 18 | 2.9541  | 20.54  | B3gnt7                                                                  |
| chr7  | 105758741 | 105759207 | 0.032695 | -19.14021 | 18 | 0.39683 | 19.537 | Dchs1                                                                   |
| chr12 | 102345472 | 102346399 | 0.032771 | -36.38888 | 18 | 5.787   | 42.176 | Rin3                                                                    |
| chr10 | 75001660  | 75001928  | 0.03278  | -13.72354 | 18 | 0.27778 | 14.001 | Rsph14 & Gnaz                                                           |
| chr18 | 75426108  | 75426690  | 0.032803 | -19.427   | 18 | 1.5542  | 20.981 |                                                                         |
| chr9  | 57615768  | 57616448  | 0.032847 | -19.81764 | 21 | 6.2302  | 26.048 | Lman1l                                                                  |
| chr7  | 1.39E+08  | 1.39E+08  | 0.032987 | -38.7202  | 16 | 3.6756  | 42.396 |                                                                         |



|       |           |           |          |           |    |         |        |                        |
|-------|-----------|-----------|----------|-----------|----|---------|--------|------------------------|
| chr11 | 3924650   | 3925248   | 0.033079 | -35.5506  | 16 | 3.125   | 38.676 | Tcn2                   |
| chrX  | 37827065  | 37827460  | 0.033139 | -19.36533 | 21 | 1.7857  | 21.151 | Rhox6                  |
| chr4  | 154268589 | 154268684 | 0.033273 | -20.28138 | 16 | 2.3153  | 22.597 | Megf6                  |
| chr5  | 123996871 | 123997100 | 0.03329  | -17.80328 | 21 | 0.19841 | 18.002 | Mir7032 & Hip1r        |
| chr7  | 144607864 | 144608044 | 0.033384 | -28.31632 | 21 | 5.5556  | 33.872 | Ano1                   |
| chr10 | 9683649   | 9684132   | 0.033536 | -32.89115 | 21 | 5.7143  | 38.605 | Gm6150                 |
| chr10 | 1.28E+08  | 1.28E+08  | 0.033601 | -16.0364  | 21 | 4.1213  | 20.158 | Rnf41                  |
| chr5  | 52538046  | 52538473  | 0.033871 | -26.76711 | 16 | 2.5521  | 29.319 | Lgi2                   |
| chr11 | 1.19E+08  | 1.19E+08  | 0.033871 | -20.1146  | 21 | 1.0204  | 21.135 | Ccdc40                 |
| chr7  | 79569590  | 79570700  | 0.034138 | -21.4943  | 21 | 3.6574  | 25.152 |                        |
| chr3  | 89941555  | 89941773  | 0.034205 | -25.2537  | 21 | 10.556  | 35.809 | Atp8b2                 |
| chr15 | 102452381 | 102452638 | 0.034205 | -16.75504 | 21 | 2.3413  | 19.096 | Amhr2                  |
| chr5  | 1.43E+08  | 1.43E+08  | 0.034659 | -9.88585  | 13 | 6.4103  | 16.296 | Tnrc18                 |
| chr4  | 152012293 | 152012444 | 0.035369 | -22.21611 | 19 | 1.372   | 23.588 | Klhl21                 |
| chr11 | 120070318 | 120070379 | 0.036134 | -20.21395 | 13 | 7.8846  | 28.099 | Cep131                 |
| chr17 | 10400814  | 10401293  | 0.036538 | -30.2549  | 26 | 5.8059  | 36.061 |                        |
| chr9  | 69636774  | 69637016  | 0.036678 | -53.8462  | 13 | 5.1282  | 58.974 |                        |
| chr12 | 1.06E+08  | 1.06E+08  | 0.036678 | -18.8233  | 13 | 7.6923  | 26.516 |                        |
| chr13 | 3221721   | 3221928   | 0.036682 | -51.4103  | 13 | 1.2821  | 52.692 |                        |
| chr6  | 98958126  | 98958675  | 0.036764 | -33.26312 | 13 | 2.0513  | 35.314 | Foxp1                  |
| chr11 | 68505009  | 68505228  | 0.036858 | -24.2247  | 13 | 5.8974  | 30.122 | Pik3r6                 |
| chr10 | 62062248  | 62063400  | 0.037038 | -23.518   | 26 | 4.9679  | 28.486 |                        |
| chr8  | 72757609  | 72758281  | 0.037155 | -21.35531 | 13 | 6.4103  | 27.766 | Sin3b                  |
| chr6  | 1.38E+08  | 1.38E+08  | 0.037182 | -20.9959  | 26 | 7.9327  | 28.929 | Dera                   |
| chr7  | 44552189  | 44552339  | 0.037262 | -22.37072 | 19 | 8.2655  | 30.636 | Nr1h2                  |
| chr4  | 103563384 | 103563560 | 0.037575 | -22.96139 | 13 | 1.9745  | 24.936 | Gm12715                |
| chr4  | 122948802 | 122949217 | 0.037724 | -31.46270 | 13 | 4.1667  | 35.629 | Mfsd2a                 |
| chr9  | 46297686  | 46298024  | 0.037724 | -21.32020 | 13 | 0.38462 | 21.705 | Bud13                  |
| chr5  | 1.29E+08  | 1.29E+08  | 0.037751 | -40.1923  | 13 | 3.4615  | 43.654 |                        |
| chr17 | 56168699  | 56168891  | 0.037757 | -31.29537 | 13 | 1.69    | 32.985 | Tnfaip8l1              |
| chr16 | 92842525  | 92843569  | 0.037781 | -37.4451  | 13 | 1.9231  | 39.368 |                        |
| chr9  | 1.03E+08  | 1.03E+08  | 0.037936 | -24.7573  | 13 | 3.5839  | 28.341 |                        |
| chr3  | 58340964  | 58341590  | 0.037936 | -23.5027  | 13 | 9.6154  | 33.118 |                        |
| chr6  | 1.15E+08  | 1.15E+08  | 0.037936 | -20.409   | 13 | 1.4957  | 21.905 | Atg7                   |
| chr9  | 56892376  | 56892463  | 0.037937 | -21.47435 | 13 | 1.9231  | 23.397 | Cspg4                  |
| chr9  | 56888234  | 56888472  | 0.037937 | -20.31898 | 13 | 1.2821  | 21.601 | Cspg4                  |
| chr8  | 124683700 | 124683947 | 0.03794  | -31.53846 | 13 | 1.0989  | 32.637 | Ttc13                  |
| chr19 | 27323829  | 27323903  | 0.037959 | -44.04761 | 13 | 1.9231  | 45.971 | Kcnv2                  |
| chr14 | 63148950  | 63149249  | 0.037959 | -24.76856 | 13 | 0.96154 | 25.73  | Fdft1                  |
| chr4  | 155454490 | 155454887 | 0.037959 | -23.42185 | 13 | 3.0769  | 26.499 | Cfap74                 |
| chr10 | 75173512  | 75173780  | 0.037959 | -18.31807 | 13 | 0.81197 | 19.13  | Bcr                    |
| chr4  | 56018110  | 56018470  | 0.038005 | -56.4103  | 13 | 5.7692  | 62.179 |                        |
| chr7  | 25081492  | 25081534  | 0.038005 | -46.03590 | 13 | 3.022   | 49.058 | Zfp574                 |
| chr11 | 102306750 | 102307079 | 0.038005 | -24.42182 | 13 | 1.6712  | 26.093 | Ubtf                   |
| chr14 | 57699839  | 57699955  | 0.038005 | -21.92363 | 13 | 6.0806  | 28.004 | Lats2 & Gm49361        |
| chr8  | 121556456 | 121556729 | 0.038005 | -21.26068 | 13 | 0.96154 | 22.222 | Fbxo31 & Gm20388       |
| chr17 | 25171261  | 25171602  | 0.038005 | -16.0445  | 13 | 1.0302  | 17.075 | Ccdc154                |
| chr12 | 1.11E+08  | 1.11E+08  | 0.038011 | -37.096   | 13 | 1.6026  | 38.699 | Cdc42bbp               |
| chr15 | 97051954  | 97052376  | 0.038011 | -33.71794 | 13 | 1.7308  | 35.449 | Slc38a4                |
| chr19 | 60079880  | 60080048  | 0.038011 | -32.2985  | 13 | 4.7527  | 37.051 |                        |
| chr1  | 89852504  | 89852969  | 0.038011 | -31.73076 | 13 | 4.8077  | 36.538 | Agap1                  |
| chr2  | 91497000  | 91497125  | 0.038011 | -29.41391 | 13 | 1.0989  | 30.513 | Lrp4                   |
| chr11 | 115957555 | 115957863 | 0.038011 | -27.94871 | 13 | 4.4872  | 32.436 | Sap30bp                |
| chr8  | 1.18E+08  | 1.18E+08  | 0.038011 | -26.2821  | 13 | 2.793   | 29.075 |                        |
| chr12 | 85467618  | 85467989  | 0.038011 | -24.5421  | 13 | 4.533   | 29.075 |                        |
| chr7  | 141360283 | 141360461 | 0.038011 | -23.17765 | 13 | 1.9231  | 25.101 | Eps8l2 & B230206H07Rik |

|       |           |           |          |           |    |         |        |                                                   |
|-------|-----------|-----------|----------|-----------|----|---------|--------|---------------------------------------------------|
| chr18 | 16316499  | 16317412  | 0.038011 | -20.9982  | 13 | 5.1282  | 26.126 |                                                   |
| chr14 | 69801393  | 69801684  | 0.038011 | -17.79609 | 13 | 2.5641  | 20.36  | Rhobtb2                                           |
| chr5  | 123531704 | 123531909 | 0.038011 | -16.28205 | 13 | 9.6154  | 25.897 | Vps33a                                            |
| chr5  | 37130443  | 37130852  | 0.038011 | -15.4536  | 13 | 7.1795  | 22.633 | Jakmip1 & Gm1043                                  |
| chr9  | 121788891 | 121788969 | 0.038033 | -31.13553 | 13 | 8.9744  | 40.11  | Hhatl                                             |
| chr1  | 1.83E+08  | 1.83E+08  | 0.038037 | -35.9295  | 13 | 0.7692  | 36.699 |                                                   |
| chr1  | 188944744 | 188944889 | 0.038037 | -26.50641 | 13 | 2.5641  | 29.071 | Ush2a                                             |
| chr11 | 89391915  | 89392006  | 0.038038 | -31.52014 | 13 | 1.9231  | 33.443 | Ankfn1                                            |
| chr10 | 40051802  | 40052040  | 0.038038 | -28.7485  | 13 | 3.8462  | 32.595 | Slc16a10                                          |
| chr5  | 31077530  | 31077627  | 0.038038 | -23.76956 | 13 | 4.9575  | 28.727 | Cad                                               |
| chr12 | 1.09E+08  | 1.09E+08  | 0.038049 | -34.0378  | 13 | 1.6667  | 35.704 | Wdr25                                             |
| chr15 | 80388408  | 80388497  | 0.038049 | -29.06232 | 13 | 8.7821  | 37.844 | Cacna1i                                           |
| chr2  | 165681403 | 165681602 | 0.038049 | -21.64835 | 13 | 5.7692  | 27.418 | Eya2                                              |
| chr2  | 27352772  | 27353039  | 0.038049 | -18.00241 | 13 | 3.4615  | 21.464 | Vav2                                              |
| chr8  | 45939658  | 45939803  | 0.038058 | -33.58974 | 13 | 1.9231  | 35.513 | Ccdc110                                           |
| chr4  | 63297825  | 63297987  | 0.038058 | -32.41453 | 13 | 6.7308  | 39.145 | Col27a1                                           |
| chr4  | 40327793  | 40328407  | 0.038058 | -30.5769  | 13 | 0.7692  | 31.346 |                                                   |
| chr18 | 82598749  | 82599071  | 0.038058 | -30.2701  | 13 | 4.5879  | 34.858 | Zfp236                                            |
| chr7  | 65701616  | 65702024  | 0.038058 | -29.37479 | 13 | 0.48077 | 29.856 | Tm2d3                                             |
| chr16 | 4633304   | 4633763   | 0.038058 | -28.25854 | 13 | 2.3504  | 30.609 | Coro7                                             |
| chr2  | 29714012  | 29714567  | 0.038058 | -21.74062 | 13 | 0.96154 | 22.702 | Rapgef1                                           |
| chr13 | 37919227  | 37919520  | 0.038058 | -20.4762  | 13 | 2.4725  | 22.949 | Rreb1                                             |
| chr4  | 134673182 | 134673571 | 0.038058 | -20.42735 | 13 | 2.5641  | 22.991 | Man1c1                                            |
| chr7  | 1.37E+08  | 1.37E+08  | 0.038058 | -20.3846  | 13 | 0.9615  | 21.346 |                                                   |
| chr8  | 122833416 | 122833662 | 0.038058 | -19.36956 | 13 | 1.2821  | 20.652 | Gm20388                                           |
| chr1  | 127573159 | 127574153 | 0.038058 | -18.64427 | 13 | 3.8462  | 22.49  | Tmem163                                           |
| chr8  | 1.2E+08   | 1.2E+08   | 0.038058 | -16.6758  | 13 | 0.9615  | 17.637 |                                                   |
| chr14 | 20032410  | 20032787  | 0.038058 | -16.047   | 13 | 2.5641  | 18.611 |                                                   |
| chr16 | 5278674   | 5279222   | 0.038347 | -36.66040 | 19 | 1.9361  | 38.596 | Gm15983                                           |
| chr17 | 27434612  | 27434801  | 0.038739 | -21.7373  | 17 | 4.7037  | 26.441 | Grm4                                              |
| chr8  | 9624971   | 9625716   | 0.039474 | -37.8472  | 12 | 1.7361  | 39.583 | Fam155a                                           |
| chr7  | 144611644 | 144611874 | 0.039646 | -20.92132 | 23 | 1.087   | 22.008 | Ano1                                              |
| chr10 | 79821676  | 79822061  | 0.040256 | -25.9629  | 17 | 1.6667  | 27.63  | Misp                                              |
| chr10 | 80901885  | 80902301  | 0.040319 | -26.5079  | 17 | 0.4202  | 26.928 | Lmnb2                                             |
| chr17 | 30729560  | 30729957  | 0.040513 | -43.00000 | 15 | 0.83333 | 43.833 | Dnah8                                             |
| chr8  | 110738351 | 110738496 | 0.04058  | -30.88235 | 17 | 0.73529 | 31.618 | Mtss1l                                            |
| chr8  | 79149121  | 79150099  | 0.040805 | -16.61764 | 17 | 3.0392  | 19.657 | Zfp827                                            |
| chr4  | 63079844  | 63079967  | 0.040982 | -36.53703 | 15 | 6.4021  | 42.939 | Zfp618                                            |
| chr18 | 61753061  | 61753380  | 0.041015 | -16.23110 | 17 | 2.8011  | 19.032 | Afap1l1                                           |
| chr5  | 147874697 | 147874871 | 0.041168 | -30.76587 | 20 | 8.5833  | 39.349 | Pomp                                              |
| chr1  | 186967225 | 186967417 | 0.041349 | -31.13119 | 15 | 7.4471  | 38.578 | Gm37912 & DNA segment, Chr 1, Pasteur Institute 1 |
| chr15 | 99627126  | 99627556  | 0.041378 | -29.04061 | 17 | 0.73529 | 29.776 | Racgap1                                           |
| chr6  | 33044402  | 33044666  | 0.041463 | -31.46825 | 12 | 0.83333 | 32.302 | Chchd3                                            |
| chr15 | 7885332   | 7886058   | 0.041463 | -21.46307 | 23 | 2.8261  | 24.289 | Wdr70                                             |
| chr16 | 52822152  | 52822296  | 0.041521 | -29.902   | 17 | 15.686  | 45.588 |                                                   |
| chr13 | 34746910  | 34747036  | 0.041521 | -13.79785 | 17 | 2.0289  | 15.827 | Fam50b                                            |
| chr19 | 58977116  | 58977517  | 0.041603 | -29.36041 | 17 | 0.4902  | 29.851 | Shtn1                                             |
| chr2  | 135703400 | 135703781 | 0.041634 | -22.11017 | 17 | 9.1503  | 31.261 | Plcb4                                             |
| chr3  | 55203785  | 55204355  | 0.041656 | -38.05641 | 23 | 28.072  | 66.128 | Sohlh2                                            |
| chr4  | 117894581 | 117895010 | 0.041656 | -32.29575 | 17 | 1.2255  | 33.521 | Ipo13                                             |
| chr9  | 118095785 | 118096329 | 0.041666 | -28.03125 | 17 | 5.7353  | 33.767 | Cmc1                                              |
| chr1  | 1.31E+08  | 1.31E+08  | 0.041666 | -27.9972  | 17 | 5.3922  | 33.389 | Dyrk3                                             |
| chr17 | 66135531  | 66136147  | 0.041666 | -26.6387  | 17 | 2.9412  | 29.58  | Ddx11                                             |
| chr4  | 136936094 | 136936258 | 0.041666 | -20.70961 | 17 | 10.889  | 31.599 | Epha8                                             |
| chr11 | 53548033  | 53548261  | 0.041669 | -18.5352  | 17 | 5.1261  | 23.661 | Sept8                                             |

|       |           |           |          |           |    |         |        |                                              |
|-------|-----------|-----------|----------|-----------|----|---------|--------|----------------------------------------------|
| chr11 | 55628793  | 55629191  | 0.04167  | -30.1471  | 17 | 4.6078  | 34.755 |                                              |
| chr17 | 25391933  | 25392301  | 0.04167  | -17.1948  | 17 | 3.3403  | 20.535 | Cacna1h                                      |
| chr12 | 76606415  | 76606496  | 0.04167  | -14.33862 | 15 | 4.2063  | 18.545 | Sptb                                         |
| chr11 | 51486435  | 51487031  | 0.041687 | -37.25490 | 17 | 2.549   | 39.804 | Col23a1                                      |
| chr9  | 56663472  | 56663851  | 0.041771 | -22.22486 | 15 | 4.5     | 26.725 | Lingo1                                       |
| chr19 | 53053638  | 53053771  | 0.041819 | -17.4444  | 15 | 2.6111  | 20.056 |                                              |
| chr8  | 4801108   | 4802118   | 0.041849 | -45.8333  | 15 | 12.222  | 58.056 |                                              |
| chr8  | 1.23E+08  | 1.23E+08  | 0.041849 | -19.8913  | 23 | 2.8675  | 22.759 | Gm45894 & ankyrin repeat domain 11 & Gm20388 |
| chr9  | 1.16E+08  | 1.16E+08  | 0.042359 | -26.8056  | 12 | 2.0833  | 28.889 |                                              |
| chr12 | 1.07E+08  | 1.07E+08  | 0.042409 | -38.1034  | 12 | 0.7955  | 38.899 |                                              |
| chr13 | 20016420  | 20016586  | 0.042443 | -45.6944  | 12 | 0.8333  | 46.528 |                                              |
| chr2  | 93194885  | 93195284  | 0.042564 | -38.67063 | 12 | 5.1587  | 43.829 | Trp53i11                                     |
| chr6  | 28418729  | 28418917  | 0.042768 | -20.19716 | 12 | 0.84135 | 21.039 | Gcc1                                         |
| chr15 | 78454026  | 78454536  | 0.042926 | -26.55754 | 12 | 9.375   | 35.933 | Tmprss6                                      |
| chr9  | 73035556  | 73036149  | 0.042953 | -51.04166 | 12 | 3.4722  | 54.514 | Pigb                                         |
| chr17 | 23283090  | 23283427  | 0.042953 | -48.3929  | 12 | 9.1766  | 57.569 |                                              |
| chr4  | 152506499 | 152506679 | 0.042953 | -46.04888 | 12 | 11.47   | 57.519 | Nphp4                                        |
| chr5  | 67402668  | 67403081  | 0.042953 | -45.97222 | 12 | 1.3889  | 47.361 | Bend4                                        |
| chr10 | 99029781  | 99030155  | 0.042953 | -45.4861  | 12 | 1.5278  | 47.014 |                                              |
| chr13 | 1.14E+08  | 1.14E+08  | 0.042953 | -43.75    | 12 | 5.8333  | 49.583 |                                              |
| chr7  | 29825979  | 29826485  | 0.042953 | -43.5795  | 12 | 3.851   | 47.431 | Zfp790                                       |
| chr11 | 96565007  | 96565387  | 0.042953 | -43.1944  | 12 | 4.1667  | 47.361 | Skap1                                        |
| chr1  | 134322295 | 134322600 | 0.042953 | -42.79761 | 12 | 4.3981  | 47.196 | Ppfia4                                       |
| chr5  | 99395951  | 99396522  | 0.042953 | -42.63888 | 12 | 4.1667  | 46.806 | Rasgef1b                                     |
| chr1  | 1.81E+08  | 1.81E+08  | 0.042953 | -42.5099  | 12 | 0.8333  | 43.343 | Pycr2                                        |
| chr11 | 1.04E+08  | 1.04E+08  | 0.042953 | -42.4239  | 12 | 5.7407  | 48.165 | Wnt9b                                        |
| chr18 | 53984269  | 53984491  | 0.042953 | -41.56746 | 12 | 4.1667  | 45.734 | Gm5507                                       |
| chr6  | 137458566 | 137459320 | 0.042953 | -40.94907 | 12 | 0.92593 | 41.875 | Ptpro                                        |
| chr13 | 56699580  | 56699972  | 0.042953 | -40.6019  | 12 | 0.8333  | 41.435 | Gm27698                                      |
| chr9  | 72431695  | 72431778  | 0.042953 | -39.375   | 12 | 1.0417  | 40.417 |                                              |
| chr4  | 139440420 | 139440489 | 0.042953 | -39.27774 | 12 | 1.6534  | 40.931 | Ubr4                                         |
| chr10 | 1.17E+08  | 1.17E+08  | 0.042953 | -39.2427  | 12 | 11.111  | 50.354 |                                              |
| chr17 | 7755223   | 7755411   | 0.042953 | -37.88194 | 12 | 3.869   | 41.751 | Fndc1                                        |
| chr6  | 124665233 | 124665340 | 0.042953 | -37.84060 | 12 | 3.4127  | 41.253 | Lpcat3                                       |
| chr1  | 1.81E+08  | 1.81E+08  | 0.042953 | -37.7778  | 12 | 0.6944  | 38.472 | Parp1                                        |
| chr2  | 179926404 | 179927277 | 0.042953 | -37.46527 | 12 | 2.2222  | 39.688 | Taf4                                         |
| chr11 | 72447573  | 72447842  | 0.042953 | -37.03373 | 12 | 0.83333 | 37.867 | Mybbp1a                                      |
| chr4  | 1.35E+08  | 1.35E+08  | 0.042953 | -36.7956  | 12 | 3.9683  | 40.764 | Man1c1                                       |
| chr17 | 34577049  | 34577558  | 0.042953 | -36.64051 | 12 | 1.0417  | 37.682 | Notch4                                       |
| chr15 | 78433600  | 78433762  | 0.042953 | -36.40046 | 12 | 9.375   | 45.775 | Kctd17                                       |
| chr1  | 1.8E+08   | 1.8E+08   | 0.042953 | -36.25    | 12 | 6.25    | 42.5   |                                              |
| chr12 | 1.08E+08  | 1.08E+08  | 0.042953 | -35.9358  | 12 | 1.875   | 37.811 |                                              |
| chr17 | 71806569  | 71806700  | 0.042953 | -35.70868 | 12 | 2.5     | 38.209 | Clip4                                        |
| chr8  | 22703412  | 22703910  | 0.042953 | -35.16188 | 12 | 0.37879 | 35.541 | Ikbbk                                        |
| chr12 | 84923536  | 84924177  | 0.042953 | -35.06944 | 12 | 1.3889  | 36.458 | Arel1                                        |
| chr14 | 121690759 | 121691689 | 0.042953 | -35.03336 | 12 | 2.0833  | 37.117 | Dock9                                        |
| chr8  | 116624027 | 116624117 | 0.042953 | -34.94047 | 12 | 0.34722 | 35.288 | Cdyl2                                        |
| chr12 | 84744300  | 84745277  | 0.042953 | -34.7222  | 12 | 4.8611  | 39.583 |                                              |
| chr6  | 1.09E+08  | 1.09E+08  | 0.042953 | -34.6329  | 12 | 6.6667  | 41.3   |                                              |
| chr19 | 6318156   | 6318327   | 0.042953 | -34.4771  | 12 | 4.4399  | 38.917 | Cdc42bpg                                     |
| chr4  | 1.28E+08  | 1.28E+08  | 0.042953 | -34.3254  | 12 | 5.5804  | 39.906 |                                              |
| chr13 | 51482110  | 51482630  | 0.042953 | -33.87896 | 12 | 1.0417  | 34.921 | Shc3                                         |
| chrX  | 69002873  | 69003087  | 0.042953 | -33.8128  | 12 | 3.75    | 37.563 |                                              |
| chr5  | 23816762  | 23817198  | 0.042953 | -33.43750 | 12 | 0.69444 | 34.132 | Rint1 & 4933427G23Rik                        |

|       |           |           |          |           |    |         |        |          |
|-------|-----------|-----------|----------|-----------|----|---------|--------|----------|
| chr12 | 82362949  | 82363073  | 0.042953 | -33.3829  | 12 | 3.3333  | 36.716 | Sipa111  |
| chr4  | 135930304 | 135930818 | 0.042953 | -33.22330 | 12 | 10.417  | 43.64  | Fuca1    |
| chr5  | 1.45E+08  | 1.45E+08  | 0.042953 | -33.0258  | 12 | 2.6786  | 35.704 |          |
| chr1  | 1.62E+08  | 1.62E+08  | 0.042953 | -32.6109  | 12 | 1.875   | 34.486 |          |
| chr4  | 106572249 | 106572343 | 0.042953 | -32.46527 | 12 | 3.0903  | 35.556 | Dhcr24   |
| chr1  | 119527010 | 119527297 | 0.042953 | -31.65238 | 12 | 7.6389  | 39.291 | Tmem185b |
| chr10 | 81082000  | 81082037  | 0.042953 | -31.54100 | 12 | 11.111  | 42.652 | Thop1    |
| chr5  | 73564260  | 73564368  | 0.042953 | -31.1773  | 12 | 6.5774  | 37.755 |          |
| chr10 | 76433342  | 76433758  | 0.042953 | -30.54563 | 12 | 6.1111  | 36.657 | Pcnt     |
| chr10 | 80008283  | 80008429  | 0.042953 | -30.49768 | 12 | 2.0833  | 32.581 | Abca7    |
| chr11 | 66084706  | 66084980  | 0.042953 | -30.31084 | 12 | 0.83333 | 31.144 | Dnah9    |
| chr10 | 1.19E+08  | 1.19E+08  | 0.042953 | -30.1984  | 12 | 3.2738  | 33.472 |          |
| chr1  | 190161540 | 190161680 | 0.042953 | -30.05787 | 12 | 1.1574  | 31.215 | Prox1    |
| chr4  | 1.54E+08  | 1.54E+08  | 0.042953 | -29.9339  | 12 | 0.8333  | 30.767 |          |
| chr3  | 87995511  | 87995686  | 0.042953 | -29.78174 | 12 | 5.5556  | 35.337 | Bcan     |
| chr5  | 139183624 | 139183839 | 0.042953 | -29.73379 | 12 | 3.125   | 32.859 | Dnaaf5   |
| chr19 | 55154886  | 55155174  | 0.042953 | -29.6528  | 12 | 4.1667  | 33.819 |          |
| chr11 | 116144023 | 116144414 | 0.042953 | -29.48412 | 12 | 1.0417  | 30.526 | Fbf1     |
| chr6  | 113679763 | 113679999 | 0.042953 | -29.16681 | 12 | 1.0417  | 30.208 | Irak2    |
| chr10 | 59871625  | 59871678  | 0.042953 | -29.0278  | 12 | 0.4167  | 29.444 | Gm7413   |
| chr8  | 44687153  | 44687405  | 0.042953 | -28.8194  | 12 | 4.1667  | 32.986 |          |
| chr5  | 1.29E+08  | 1.29E+08  | 4.30E-02 | -28.7798  | 12 | 2.9167  | 31.696 | Rimbp2   |
| chr15 | 96649203  | 96649364  | 0.042953 | -28.5384  | 12 | 14.54   | 43.079 |          |
| chr15 | 87876572  | 87876922  | 0.042953 | -28.399   | 12 | 2.3313  | 30.73  |          |
| chr9  | 44692548  | 44693063  | 0.042953 | -28.34325 | 12 | 2.2222  | 30.565 | Phldb1   |
| chr15 | 82203208  | 82203328  | 0.042953 | -28.25396 | 12 | 2.619   | 30.873 | Srebfb2  |
| chr12 | 1.15E+08  | 1.15E+08  | 0.042953 | -28.0704  | 12 | 1.3889  | 29.459 |          |
| chr5  | 103834712 | 103835299 | 0.042953 | -27.83234 | 12 | 3.5417  | 31.374 | Aff1     |
| chr11 | 72378458  | 72379129  | 0.042953 | -27.5694  | 12 | 1.0417  | 28.611 |          |
| chr11 | 59249971  | 59250071  | 0.042953 | -27.40064 | 12 | 5.0183  | 32.419 | Wnt3a    |
| chr18 | 11952042  | 11952479  | 0.042953 | -27.3211  | 12 | 1.9481  | 29.269 |          |
| chr15 | 1.02E+08  | 1.02E+08  | 0.042953 | -27.0602  | 12 | 0.9259  | 27.986 |          |
| chr14 | 60766562  | 60766948  | 0.042953 | -26.6399  | 20 | 7.7917  | 34.432 |          |
| chr14 | 120798918 | 120799397 | 0.042953 | -26.59035 | 12 | 5.3175  | 31.908 | Gm25781  |
| chr12 | 84681216  | 84681593  | 0.042953 | -26.52777 | 12 | 7.2222  | 33.75  | Syndig1l |
| chr7  | 139919743 | 139920069 | 0.042953 | -26.51124 | 12 | 4.4444  | 30.956 | Kndc1    |
| chr11 | 5997285   | 5997455   | 0.042953 | -25.69444 | 12 | 2.7778  | 28.472 | Camk2b   |
| chr17 | 5768274   | 5768710   | 0.042953 | -25.2778  | 12 | 3.1994  | 28.477 |          |
| chr18 | 74700819  | 74701524  | 0.042953 | -24.6729  | 12 | 4.2163  | 28.889 | Myo5b    |
| chr8  | 12471475  | 12471895  | 0.042953 | -24.1468  | 12 | 0.6944  | 24.841 |          |
| chr4  | 154161772 | 154161969 | 0.042953 | -23.67355 | 12 | 1.882   | 25.556 | Wrap73   |
| chr11 | 118758733 | 118759180 | 0.042953 | -23.63905 | 12 | 5.3427  | 28.982 | Rbfox3   |
| chr4  | 135561147 | 135561597 | 0.042953 | -23.57804 | 12 | 3.6706  | 27.249 | Grhl3    |
| chr17 | 28807017  | 28807473  | 0.042953 | -23.24404 | 12 | 1.9841  | 25.228 | Brpf3    |
| chr7  | 143480419 | 143480500 | 0.042953 | -23.10515 | 12 | 2.2222  | 25.327 | Slc22a18 |
| chr11 | 1.07E+08  | 1.07E+08  | 0.042953 | -22.7083  | 12 | 4.1667  | 26.875 |          |
| chr7  | 127882432 | 127882560 | 0.042953 | -22.65241 | 12 | 3.5119  | 26.164 | Zfp646   |
| chr2  | 26481514  | 26481831  | 0.042953 | -22.62103 | 20 | 2.5089  | 25.13  | Notch1   |
| chr6  | 1.25E+08  | 1.25E+08  | 0.042953 | -22.4653  | 12 | 2.0833  | 24.549 | Pianp    |
| chr10 | 1.18E+08  | 1.18E+08  | 0.042953 | -22.1101  | 12 | 1.3889  | 23.499 |          |
| chr2  | 1.59E+08  | 1.59E+08  | 0.042953 | -21.994   | 12 | 1.0417  | 23.036 | Dhx35    |
| chr5  | 37155657  | 37156096  | 0.042953 | -21.83531 | 12 | 3.7202  | 25.556 | Gm1043   |
| chr4  | 41563291  | 41563465  | 0.042953 | -21.54100 | 12 | 2.0833  | 23.624 | Fam219a  |
| chr15 | 91709902  | 91710054  | 0.042953 | -21.2563  | 12 | 3.7536  | 25.01  | Lrrk2    |
| chr4  | 1.37E+08  | 1.37E+08  | 0.042953 | -20.8614  | 12 | 3.6706  | 24.532 | Epha8    |
| chr18 | 36535422  | 36535582  | 0.042953 | -20.2745  | 12 | 3.8889  | 24.163 | Slc4a9   |
| chr4  | 155328903 | 155329083 | 0.042953 | -20.04629 | 12 | 4.6875  | 24.734 | Prkcz    |
| chr18 | 77995591  | 77995789  | 0.042953 | -19.98511 | 12 | 0.52083 | 20.506 | Epg5     |

|       |           |           |          |           |    |        |        |                     |
|-------|-----------|-----------|----------|-----------|----|--------|--------|---------------------|
| chr12 | 111329867 | 111330004 | 0.042953 | -19.48195 | 12 | 7.9167 | 27.399 | Cdc42bpb            |
| chr4  | 131819399 | 131819527 | 0.042953 | -19.33722 | 12 | 2.9726 | 22.31  | Ptpru               |
| chr14 | 31162371  | 31162577  | 0.042953 | -18.45978 | 12 | 4.1997 | 22.66  | Stab1               |
| chr5  | 113566314 | 113566379 | 0.042953 | -17.92989 | 12 | 2.0833 | 20.013 | Wscd2               |
| chr7  | 80338874  | 80339090  | 0.042953 | -17.84692 | 12 | 3.9352 | 21.782 | Unc45a              |
| chr2  | 164215198 | 164215389 | 0.042953 | -16.98908 | 12 | 2.2222 | 19.211 | Wfcd15b             |
| chr5  | 1.15E+08  | 1.15E+08  | 0.042953 | -16.3863  | 12 | 0.5208 | 16.907 | 2210016L21Rik       |
| chr5  | 1.21E+08  | 1.21E+08  | 0.042953 | -15.8069  | 20 | 3.7946 | 19.602 |                     |
| chr11 | 97301565  | 97301721  | 0.042953 | -15.7986  | 12 | 1.3889 | 17.188 |                     |
| chr17 | 25381514  | 25381591  | 0.042953 | -15.41305 | 12 | 15.341 | 30.754 | Cacna1h             |
| chr9  | 61020034  | 61020747  | 0.042953 | -12.1063  | 12 | 2.381  | 14.487 |                     |
| chr8  | 23234267  | 23235439  | 0.043441 | -28.14236 | 24 | 3.8542 | 31.997 | Gins4               |
| chr5  | 115620011 | 115620207 | 0.043481 | -15.82994 | 18 | 2.3721 | 18.202 | Gcn111              |
| chr17 | 66379718  | 66379819  | 0.045057 | -21.45189 | 14 | 4.6471 | 26.099 | Mtcl1               |
| chr16 | 90674472  | 90675233  | 0.045964 | -41.89814 | 18 | 9.4907 | 51.389 | AC160759.1          |
| chr5  | 65064425  | 65065058  | 0.046033 | -27.2332  | 18 | 4.6296 | 31.863 | Tmem156             |
| chr4  | 43029018  | 43029625  | 0.046033 | -22.29055 | 14 | 5.5014 | 27.792 | Stoml2              |
| chrUn | 43767     | 45064     | 0.046094 | -8.61987  | 26 | 10.921 | 19.541 |                     |
| chr3  | 38455795  | 38455996  | 0.046421 | -14.94841 | 25 | 1      | 15.948 | Ankrd50             |
| chr11 | 84897235  | 84897753  | 0.046565 | -27.24316 | 18 | 5.0562 | 32.299 | Myo19               |
| chr14 | 35044256  | 35044826  | 0.046826 | -27.47669 | 11 | 2.2727 | 29.749 | Grid1               |
| chr7  | 40388367  | 40388570  | 0.046879 | -65.08333 | 10 | 2.25   | 67.333 | Gm28807             |
| chr12 | 94661917  | 94662155  | 0.046879 | -62.3333  | 10 | 10     | 72.333 |                     |
| chr3  | 135526587 | 135526669 | 0.046879 | -60.00000 | 10 | 2.5    | 62.5   | Manba               |
| chr3  | 85183697  | 85184205  | 0.046879 | -59.14682 | 10 | 8.2143 | 67.361 | Gm37240             |
| chr12 | 110816070 | 110816160 | 0.046879 | -58.66666 | 10 | 1.6667 | 60.333 | Mok                 |
| chr6  | 76496723  | 76496842  | 0.046879 | -58.28125 | 16 | 4.2188 | 62.5   | Gm9008 &<br>Gm44166 |
| chr10 | 11856248  | 11856277  | 0.046879 | -57.9167  | 10 | 9.1667 | 67.083 |                     |
| chr5  | 114953326 | 114953362 | 0.046879 | -57.44047 | 10 | 2.5    | 59.94  | Hnf1a               |
| chr16 | 97502214  | 97502413  | 0.046879 | -56.91666 | 10 | 2.5    | 59.417 | Fam3b               |
| chr8  | 40016430  | 40016565  | 0.046879 | -56.8333  | 10 | 1.6667 | 58.5   |                     |
| chr9  | 1.03E+08  | 1.03E+08  | 0.046879 | -52.9167  | 10 | 6.25   | 59.167 | Ky                  |
| chr12 | 85306194  | 85306476  | 0.046879 | -52.59523 | 10 | 3.2143 | 55.81  | Nek9                |
| chr11 | 91576755  | 91576866  | 0.046879 | -52.57142 | 10 | 9.9286 | 62.5   | Kif2b               |
| chr5  | 136275089 | 136275169 | 0.046879 | -52.41666 | 10 | 2.5    | 54.917 | Cux1 & Gm16599      |
| chr10 | 1.19E+08  | 1.19E+08  | 0.046879 | -52.25    | 10 | 10.417 | 62.667 |                     |
| chr15 | 97758851  | 97759052  | 0.046879 | -51.79166 | 10 | 1      | 52.792 | Rapgef3             |
| chr11 | 43388413  | 43388628  | 0.046879 | -51.25    | 10 | 1.6667 | 52.917 |                     |
| chr2  | 1.69E+08  | 1.69E+08  | 0.046879 | -51.1905  | 10 | 2.5    | 53.69  |                     |
| chr10 | 62222644  | 62222886  | 0.046879 | -51.15476 | 10 | 2.8333 | 53.988 | Tspan15             |
| chr4  | 1.4E+08   | 1.4E+08   | 0.046879 | -51.0238  | 10 | 1      | 52.024 |                     |
| chr1  | 136070681 | 136070769 | 0.046879 | -50.45634 | 10 | 1.25   | 51.706 | Cacna1s             |
| chr16 | 23245436  | 23245627  | 0.046879 | -49.97619 | 10 | 2.6667 | 52.643 | St6gal1             |
| chr4  | 117111004 | 117111224 | 0.046879 | -49.61767 | 10 | 4.9061 | 54.524 | Ptch2               |
| chr4  | 152466690 | 152466747 | 0.046879 | -49.58333 | 10 | 5.8333 | 55.417 | Kcnab2              |
| chr9  | 102886016 | 102886140 | 0.046879 | -49.42857 | 10 | 2.5    | 51.929 | Ryk                 |
| chr1  | 1.27E+08  | 1.27E+08  | 0.046879 | -49.0833  | 10 | 1      | 50.083 | Mgat5               |
| chr9  | 89008178  | 89008338  | 0.046879 | -48.9405  | 10 | 30.643 | 79.583 |                     |
| chr5  | 1.51E+08  | 1.51E+08  | 0.046879 | -48.3611  | 10 | 1.5556 | 49.917 |                     |
| chr1  | 118022428 | 118022550 | 0.046879 | -48.33333 | 10 | 36.667 | 85     | Gm28358             |
| chr18 | 4336250   | 4336529   | 0.046879 | -48.19841 | 10 | 1.5476 | 49.746 | Map3k8              |
| chr17 | 84633498  | 84633596  | 0.046879 | -48.08333 | 10 | 2.5    | 50.583 | Dync2li1            |
| chr5  | 88657039  | 88658014  | 0.046879 | -48       | 10 | 1      | 49     |                     |
| chr4  | 129476799 | 129477173 | 0.046879 | -47.66666 | 10 | 1.25   | 48.917 | Bsdc1               |
| chr10 | 21489196  | 21489651  | 0.046879 | -47.5833  | 10 | 7.5    | 55.083 |                     |
| chr2  | 165655618 | 165656228 | 0.046879 | -47.54761 | 10 | 1      | 48.548 | Eya2                |
| chr5  | 136859103 | 136859277 | 0.046879 | -47.50000 | 10 | 5      | 52.5   | Col26a1             |

|       |           |           |          |           |    |         |        |                                                   |
|-------|-----------|-----------|----------|-----------|----|---------|--------|---------------------------------------------------|
| chr13 | 1.15E+08  | 1.15E+08  | 0.046879 | -47.0833  | 10 | 3.75    | 50.833 |                                                   |
| chr5  | 1.2E+08   | 1.2E+08   | 0.046879 | -46.8333  | 10 | 1.25    | 48.083 |                                                   |
| chr2  | 32266369  | 32266727  | 0.046879 | -46.381   | 10 | 1       | 47.381 |                                                   |
| chr5  | 125452604 | 125452697 | 0.046879 | -45.97222 | 10 | 1.25    | 47.222 | Bri3bp                                            |
| chr7  | 1.42E+08  | 1.42E+08  | 0.046879 | -45.8561  | 10 | 3.5     | 49.356 |                                                   |
| chr4  | 155445763 | 155446149 | 0.046879 | -45.16666 | 10 | 1.25    | 46.417 | Cfap74                                            |
| chr18 | 68119943  | 68120790  | 0.046879 | -44.94642 | 10 | 2.0536  | 47     | Ldlrad4                                           |
| chr7  | 34843016  | 34843377  | 0.046879 | -44.7976  | 10 | 0.9167  | 45.714 |                                                   |
| chr2  | 156505895 | 156506206 | 0.046879 | -44.67857 | 10 | 2.9167  | 47.595 | Epb4111                                           |
| chr10 | 96450998  | 96451435  | 0.046879 | -44.5833  | 10 | 3.75    | 48.333 |                                                   |
| chr10 | 95015681  | 95015953  | 0.046879 | -44.25    | 10 | 1.6667  | 45.917 |                                                   |
|       |           |           |          |           |    |         |        | Gm20388 & CBFA2/RUNX1 translocation partner 3     |
| chr8  | 122683086 | 122683228 | 0.046879 | -44.23809 | 10 | 2.4286  | 46.667 |                                                   |
| chr4  | 124685278 | 124685787 | 0.046879 | -44.16666 | 10 | 1       | 45.167 | Utp11                                             |
| chr12 | 111263715 | 111263814 | 0.046879 | -44.14881 | 10 | 0.625   | 44.774 | Traf3                                             |
| chr3  | 83916336  | 83916487  | 0.046879 | -44.1111  | 10 | 3.0556  | 47.167 | Tmem131l                                          |
| chr13 | 96088441  | 96088658  | 0.046879 | -44.02525 | 10 | 4.4747  | 48.5   | Sv2c                                              |
| chr17 | 67632303  | 67632551  | 0.046879 | -43.8333  | 10 | 2.5     | 46.333 | Lrrc30                                            |
| chr4  | 1.52E+08  | 1.52E+08  | 0.046879 | -43.75    | 10 | 2.5     | 46.25  | Camta1                                            |
| chr4  | 57585849  | 57586262  | 0.046879 | -43.6667  | 10 | 2.5     | 46.167 | Palm2 & Pakap                                     |
| chr17 | 63469610  | 63470150  | 0.046879 | -43.4588  | 10 | 2.7143  | 46.173 | Fbxl17                                            |
| chr2  | 132515107 | 132515342 | 0.046879 | -43.33333 | 10 | 1.25    | 44.583 | 1700026D11Rik                                     |
| chrX  | 48397570  | 48398165  | 0.046879 | -43.16666 | 10 | 1       | 44.167 | Bcor1                                             |
| chr1  | 1.35E+08  | 1.35E+08  | 0.046879 | -43.0087  | 10 | 7.7917  | 50.8   | Nav1                                              |
| chr3  | 89166909  | 89167068  | 0.046879 | -43.00000 | 10 | 3.6667  | 46.667 | Clk2                                              |
| chr2  | 1.64E+08  | 1.64E+08  | 0.046879 | -42.9419  | 11 | 1.2987  | 44.241 |                                                   |
| chr16 | 34030532  | 34031210  | 0.046879 | -42.69480 | 11 | 1.5152  | 44.21  | Kalrn                                             |
| chr9  | 65278511  | 65278676  | 0.046879 | -42.6667  | 10 | 3.3333  | 46     | Cilp                                              |
| chr4  | 1.07E+08  | 1.07E+08  | 0.046879 | -42.6071  | 10 | 1       | 43.607 |                                                   |
| chr7  | 28221006  | 28221153  | 0.046879 | -42.6042  | 16 | 27.708  | 70.313 |                                                   |
| chr15 | 58418557  | 58419047  | 0.046879 | -42.48214 | 10 | 5.1726  | 47.655 | Fam91a1                                           |
| chr10 | 1.28E+08  | 1.28E+08  | 0.046879 | -42.3889  | 10 | 1.6667  | 44.056 | Timeless                                          |
| chr7  | 25824100  | 25824351  | 0.046879 | -42.25    | 10 | 2       | 44.25  |                                                   |
| chrX  | 1.47E+08  | 1.47E+08  | 0.046879 | -42.1548  | 10 | 1.4286  | 43.583 |                                                   |
| chr2  | 75593674  | 75593903  | 0.046879 | -42.0694  | 10 | 2.5     | 44.569 |                                                   |
| chr8  | 88021474  | 88021650  | 0.046879 | -42       | 10 | 2.9167  | 44.917 |                                                   |
| chr6  | 56966109  | 56966295  | 0.046879 | -41.9821  | 10 | 8.1955  | 50.178 |                                                   |
|       |           |           |          |           |    |         |        | Gm45188 & UV radiation resistance associated gene |
| chr7  | 98897461  | 98897969  | 0.046879 | -41.91666 | 10 | 0.83333 | 42.75  |                                                   |
| chr17 | 24513230  | 24513321  | 0.046879 | -41.66666 | 10 | 2.5     | 44.167 | Traf7                                             |
| chr4  | 1.39E+08  | 1.39E+08  | 0.046879 | -41.619   | 10 | 1.25    | 42.869 | Nbl1                                              |
| chr10 | 121243561 | 121243667 | 0.046879 | -41.18813 | 10 | 0.90909 | 42.097 | Gm35404                                           |
| chr11 | 1.18E+08  | 1.18E+08  | 0.046879 | -40.9802  | 10 | 2.381   | 43.361 |                                                   |
| chrX  | 48273087  | 48273392  | 0.046879 | -40.83333 | 10 | 2.5     | 43.333 | Utp14a                                            |
| chr5  | 22706040  | 22706821  | 0.046879 | -40.76190 | 10 | 1       | 41.762 | 6030443J06Rik                                     |
| chr9  | 78388983  | 78389836  | 0.046879 | -40.5087  | 11 | 1.1364  | 41.645 | Gm8087                                            |
| chr8  | 13112082  | 13112417  | 0.046879 | -40.50000 | 10 | 6.25    | 46.75  | Cul4a                                             |
| chr10 | 79867021  | 79867241  | 0.046879 | -40.25    | 10 | 2.5     | 42.75  | Plppr3                                            |
| chrX  | 11283506  | 11283780  | 0.046879 | -40.1786  | 10 | 41.488  | 81.667 |                                                   |
| chr5  | 1.34E+08  | 1.34E+08  | 0.046879 | -40.1667  | 10 | 4.1667  | 44.333 | Gtf2i                                             |
| chr9  | 97980773  | 97981541  | 0.046879 | -40.16666 | 10 | 0.83333 | 41     | Clstn2                                            |
| chr3  | 51690405  | 51690543  | 0.046879 | -39.85714 | 10 | 1.6667  | 41.524 | Maml3                                             |
| chr8  | 47355974  | 47356252  | 0.046879 | -39.69047 | 10 | 6       | 45.69  | Stox2                                             |
| chr8  | 79998627  | 79998833  | 0.046879 | -39.5833  | 10 | 2.5     | 42.083 | Hhip                                              |

|       |           |           |          |           |    |         |        |                                                            |
|-------|-----------|-----------|----------|-----------|----|---------|--------|------------------------------------------------------------|
| chr10 | 88434453  | 88434990  | 0.046879 | -39.50000 | 10 | 1.6667  | 41.167 | Gnptab                                                     |
| chr5  | 1.15E+08  | 1.15E+08  | 0.046879 | -39.5     | 10 | 2       | 41.5   |                                                            |
| chr8  | 1.25E+08  | 1.25E+08  | 0.046879 | -39.4643  | 10 | 3       | 42.464 | Disc1                                                      |
| chr12 | 1.07E+08  | 1.07E+08  | 0.046879 | -39.4524  | 10 | 2.6667  | 42.119 |                                                            |
| chr11 | 103076028 | 103076399 | 0.046879 | -39.33333 | 10 | 1.6667  | 41     | Plcd3                                                      |
| chr11 | 94566977  | 94567027  | 0.046879 | -39.27579 | 10 | 0.625   | 39.901 | Acsf2 & Chad                                               |
| chr2  | 1.68E+08  | 1.68E+08  | 0.046879 | -39.2381  | 10 | 1.25    | 40.488 |                                                            |
| chr11 | 64071623  | 64071882  | 0.046879 | -39.16666 | 16 | 7.2917  | 46.458 | Cox10                                                      |
| chr2  | 118718269 | 118718826 | 0.046879 | -39.16666 | 10 | 1.25    | 40.417 | Plcb2                                                      |
| chr2  | 1.73E+08  | 1.73E+08  | 0.046879 | -39.0833  | 10 | 2.5     | 41.583 |                                                            |
| chr4  | 33225916  | 33226120  | 0.046879 | -39.02777 | 10 | 3.8889  | 42.917 | Srsf12                                                     |
| chr16 | 93807318  | 93807786  | 0.046879 | -38.97420 | 10 | 2       | 40.974 | Dop1b                                                      |
| chr8  | 110592272 | 110592643 | 0.046879 | -38.68284 | 10 | 3.8846  | 42.567 | Hydin                                                      |
| chr10 | 99595411  | 99595685  | 0.046879 | -38.6607  | 14 | 18.929  | 57.589 |                                                            |
| chr17 | 25970350  | 25970750  | 0.046879 | -38.62481 | 10 | 5       | 43.625 | Capn15                                                     |
| chr8  | 13001660  | 13001826  | 0.046879 | -38.56196 | 10 | 5.5833  | 44.145 | Mcf2l                                                      |
| chr6  | 49957952  | 49958501  | 0.046879 | -38.4686  | 11 | 2.2727  | 40.741 |                                                            |
| chr11 | 97514605  | 97515257  | 0.046879 | -37.95238 | 10 | 0.71429 | 38.667 | Srcin1                                                     |
| chr4  | 135497511 | 135497789 | 0.046879 | -37.91666 | 10 | 6       | 43.917 | Stpg1                                                      |
| chr8  | 22678881  | 22679135  | 0.046879 | -37.9107  | 10 | 3.3929  | 41.304 | lkbkb                                                      |
| chr10 | 1.18E+08  | 1.18E+08  | 0.046879 | -37.7662  | 10 | 4.4084  | 42.175 |                                                            |
| chr5  | 149568429 | 149568682 | 0.046879 | -37.75000 | 10 | 10.583  | 48.333 | Wdr95                                                      |
| chr9  | 1.03E+08  | 1.03E+08  | 0.046879 | -37.75    | 10 | 1.75    | 39.5   |                                                            |
| chr2  | 59726033  | 59726351  | 0.046879 | -37.5833  | 10 | 1.25    | 38.833 | Tanc1                                                      |
| chr7  | 142492185 | 142492414 | 0.046879 | -37.47321 | 10 | 2.2619  | 39.735 | Prr33 & Lsp1                                               |
| chr17 | 56352539  | 56352612  | 0.046879 | -37.45951 | 10 | 13.621  | 51.081 | Kdm4b                                                      |
| chr17 | 72388730  | 72389033  | 0.046879 | -37.37103 | 10 | 5.125   | 42.496 | Alk                                                        |
| chr5  | 124120118 | 124120516 | 0.046879 | -37.34722 | 10 | 4.3333  | 41.681 | Pitpnm2                                                    |
| chr16 | 14391395  | 14392048  | 0.046879 | -37.26190 | 10 | 3       | 40.262 | Abcc1                                                      |
| chr4  | 117145390 | 117145639 | 0.046879 | -37.24404 | 10 | 1.6667  | 38.911 | Best4-ps                                                   |
| chr4  | 79142986  | 79143366  | 0.046879 | -36.8333  | 10 | 2.5     | 39.333 |                                                            |
| chr2  | 1.75E+08  | 1.75E+08  | 0.046879 | -36.7857  | 10 | 2.7976  | 39.583 |                                                            |
| chr10 | 33178817  | 33179106  | 0.046879 | -36.50000 | 10 | 4.1667  | 40.667 | Trdn                                                       |
| chr16 | 38326556  | 38326664  | 0.046879 | -36.50000 | 10 | 7.25    | 43.75  | Maats1                                                     |
| chr2  | 94682528  | 94682971  | 0.046879 | -36.4702  | 10 | 1.4286  | 37.899 |                                                            |
| chr10 | 108356690 | 108356888 | 0.046879 | -36.41666 | 10 | 0.83333 | 37.25  | Pawr                                                       |
| chr2  | 1.68E+08  | 1.68E+08  | 0.046879 | -36.377   | 10 | 2.5     | 38.877 |                                                            |
| chr1  | 74191589  | 74191926  | 0.046879 | -36.3636  | 11 | 2.6515  | 39.015 | Cxcr1                                                      |
| chrX  | 1.23E+08  | 1.23E+08  | 0.046879 | -36.3333  | 10 | 1.6667  | 38     | Cldn34c1                                                   |
| chr17 | 24585485  | 24585797  | 0.046879 | -36.25000 | 10 | 2.5     | 38.75  | Pkd1                                                       |
| chr7  | 30173693  | 30174195  | 0.046879 | -36.1845  | 10 | 7.75    | 43.935 | Gm5113                                                     |
| chr4  | 1.4E+08   | 1.4E+08   | 0.046879 | -36.1667  | 10 | 5       | 41.167 | Igsf21                                                     |
| chr7  | 1.03E+08  | 1.03E+08  | 0.046879 | -36.131   | 10 | 5.1667  | 41.298 | Trim68                                                     |
| chr7  | 28174514  | 28174811  | 0.046879 | -35.97420 | 10 | 2.6667  | 38.641 | Fbl                                                        |
| chr13 | 98161038  | 98161130  | 0.046879 | -35.97222 | 10 | 2.5     | 38.472 | Arhgef28                                                   |
| chr7  | 1.44E+08  | 1.44E+08  | 0.046879 | -35.9345  | 10 | 2.6667  | 38.601 |                                                            |
| chr11 | 106543572 | 106543752 | 0.046879 | -35.73214 | 10 | 2.1032  | 37.835 | Tex2                                                       |
| chr2  | 1.63E+08  | 1.63E+08  | 0.046879 | -35.6925  | 10 | 9.4742  | 45.167 |                                                            |
|       |           |           |          |           |    |         |        | Tmcc3os &<br>transmembrane<br>and coiled coil<br>domains 3 |
| chr10 | 94587023  | 94587223  | 0.046879 | -35.5824  | 16 | 11.293  | 46.875 |                                                            |
| chr2  | 127238257 | 127238656 | 0.046879 | -35.53084 | 10 | 1       | 36.531 | Snrnp200                                                   |
| chr12 | 98679234  | 98679459  | 0.046879 | -35.48484 | 10 | 2.5     | 37.985 | Ptpn21                                                     |
| chr11 | 119857915 | 119858079 | 0.046879 | -35.47222 | 10 | 4.1667  | 39.639 | Rptor                                                      |
| chr7  | 110282058 | 110282806 | 0.046879 | -35.42099 | 10 | 2.5     | 37.921 | Swap70                                                     |
| chr15 | 79963341  | 79963893  | 0.046879 | -35.3452  | 10 | 1.25    | 36.595 | Cbx7                                                       |
| chr11 | 113834680 | 113834937 | 0.046879 | -35.33549 | 10 | 5.5833  | 40.919 | Sdk2                                                       |

|       |           |           |          |           |    |         |        |               |
|-------|-----------|-----------|----------|-----------|----|---------|--------|---------------|
| chr10 | 76772247  | 76772809  | 0.046879 | -35.16666 | 10 | 2.9643  | 38.131 | Pcbp3         |
| chr2  | 155810319 | 155810398 | 0.046879 | -35.09523 | 10 | 1.25    | 36.345 | Mmp24         |
| chr15 | 59323582  | 59324200  | 0.046879 | -35.0833  | 10 | 1.25    | 36.333 | Sqle          |
| chr11 | 88845969  | 88846167  | 0.046879 | -35.02777 | 10 | 1.25    | 36.278 | Akap1         |
| chr14 | 30096214  | 30096438  | 0.046879 | -35.00000 | 10 | 2.6667  | 37.667 | Cacna1d       |
| chr4  | 1.35E+08  | 1.35E+08  | 0.046879 | -34.9708  | 10 | 3       | 37.971 |               |
| chr15 | 78705530  | 78705854  | 0.046879 | -34.87500 | 10 | 1.25    | 36.125 | Elfn2         |
| chr18 | 19130382  | 19130600  | 0.046879 | -34.7857  | 10 | 9.1786  | 43.964 |               |
| chr2  | 28548389  | 28548681  | 0.046879 | -34.72420 | 10 | 5.6786  | 40.403 | Ralgds        |
| chr8  | 88305843  | 88306454  | 0.046879 | -34.66010 | 10 | 0.55556 | 35.216 | Adcy7         |
| chr10 | 77054812  | 77054939  | 0.046879 | -34.65187 | 11 | 3.4091  | 38.061 | Slc19a1 &     |
| chr15 | 79126933  | 79127051  | 0.046879 | -34.51190 | 10 | 7.5     | 42.012 | Micall1       |
| chr14 | 34036744  | 34037058  | 0.046879 | -34.44047 | 10 | 5       | 39.44  | Gm5460        |
| chr8  | 114972080 | 114972513 | 0.046879 | -34.38888 | 10 | 11.833  | 46.222 | Wwox          |
| chr4  | 117876927 | 117876956 | 0.046879 | -34.33333 | 10 | 5       | 39.333 | B4galt2       |
| chr14 | 32919119  | 32919290  | 0.046879 | -34.25    | 10 | 5       | 39.25  | Vstm4         |
| chr2  | 1.61E+08  | 1.61E+08  | 0.046879 | -34.2262  | 10 | 5       | 39.226 |               |
| chr1  | 92403835  | 92404353  | 0.046879 | -34.2053  | 10 | 3.8095  | 38.015 |               |
| chr2  | 1.79E+08  | 1.79E+08  | 0.046879 | -34.1468  | 10 | 2       | 36.147 |               |
| chr4  | 1.36E+08  | 1.36E+08  | 0.046879 | -34.125   | 10 | 6.25    | 40.375 | Asap3         |
| chr5  | 62777540  | 62778024  | 0.046879 | -34.0909  | 11 | 2.2727  | 36.364 |               |
| chr5  | 115444956 | 115445177 | 0.046879 | -33.89484 | 10 | 0.71429 | 34.609 | Msi1          |
| chr7  | 118434121 | 118434178 | 0.046879 | -33.82341 | 10 | 13.333  | 47.157 | Syt17         |
| chr15 | 84647234  | 84647604  | 0.046879 | -33.7976  | 10 | 1       | 34.798 |               |
| chr2  | 31090048  | 31090375  | 0.046879 | -33.75000 | 10 | 1.6667  | 35.417 | Fnbp1         |
| chr11 | 116118927 | 116119165 | 0.046879 | -33.50000 | 10 | 1       | 34.5   | Trim47        |
| chr18 | 73954291  | 73954600  | 0.046879 | -33.46428 | 10 | 1       | 34.464 | Mapk4         |
| chr8  | 105779712 | 105779930 | 0.046879 | -33.45238 | 10 | 4.2143  | 37.667 | Ranbp10       |
| chr16 | 91917178  | 91917623  | 0.046879 | -33.3333  | 10 | 3.0833  | 36.417 | Atp5o & ltsn1 |
| chr2  | 165380992 | 165381260 | 0.046879 | -33.31011 | 16 | 4.0104  | 37.321 | Zfp334        |
| chr11 | 33283908  | 33284765  | 0.046879 | -33.26190 | 10 | 3.3333  | 36.595 | Ranbp17       |
| chr1  | 72399045  | 72399198  | 0.046879 | -33.131   | 10 | 1.6667  | 34.798 |               |
| chr2  | 5699740   | 5700379   | 0.046879 | -33.03030 | 10 | 3.6667  | 36.697 | Camk1d        |
| chr7  | 126492471 | 126492689 | 0.046879 | -32.91666 | 10 | 1.6667  | 34.583 | Atxn2l        |
| chr11 | 43380015  | 43380460  | 0.046879 | -32.8734  | 11 | 2.9221  | 35.795 |               |
| chr4  | 148594169 | 148594537 | 0.046879 | -32.60101 | 11 | 8.5354  | 41.136 | Srm           |
| chr4  | 47836668  | 47837118  | 0.046879 | -32.56818 | 10 | 2.2917  | 34.86  | Gm38343       |
| chr8  | 109550536 | 109550806 | 0.046879 | -32.55952 | 10 | 3.4286  | 35.988 | Dhx38         |
| chr5  | 137666427 | 137666647 | 0.046879 | -32.54761 | 10 | 2.0833  | 34.631 | Agfg2         |
| chr4  | 151346426 | 151346760 | 0.046879 | -32.52232 | 16 | 2.5     | 35.022 | Camta1        |
| chr3  | 1.35E+08  | 1.35E+08  | 0.046879 | -32.5     | 10 | 2.5     | 35     |               |
| chr13 | 55550159  | 55550565  | 0.046879 | -32.4603  | 10 | 5.373   | 37.833 | Fam193b       |
| chr11 | 1.09E+08  | 1.09E+08  | 0.046879 | -32.4098  | 22 | 6.9859  | 39.396 | Axin2         |
| chr4  | 152308791 | 152308877 | 0.046879 | -32.39682 | 10 | 3.7222  | 36.119 | Rnf207        |
| chr3  | 89443508  | 89443688  | 0.046879 | -32.35119 | 14 | 3.7202  | 36.071 | Pbxip1        |
| chr10 | 120813563 | 120813992 | 0.046879 | -32.32684 | 11 | 6.8182  | 39.145 | Msr3          |
| chr4  | 82884618  | 82884778  | 0.046879 | -32.2619  | 10 | 2.5     | 34.762 | Cer1          |
| chr4  | 126593535 | 126594002 | 0.046879 | -32.16666 | 10 | 6.2619  | 38.429 | Clsn          |
| chr7  | 1.14E+08  | 1.14E+08  | 0.046879 | -32.0991  | 10 | 1.25    | 33.349 | Rras2         |
| chr1  | 120012534 | 120012830 | 0.046879 | -31.89059 | 14 | 0.5102  | 32.401 | Sctr          |
| chr5  | 15644117  | 15644671  | 0.046879 | -31.88131 | 11 | 2.0202  | 33.902 | Gm21847       |
| chr4  | 1.32E+08  | 1.32E+08  | 0.046879 | -31.8333  | 10 | 4.1667  | 36     |               |
| chr3  | 44024286  | 44024510  | 0.046879 | -31.8214  | 10 | 11.917  | 43.738 |               |
| chr11 | 88088412  | 88089115  | 0.046879 | -31.7778  | 10 | 1.6667  | 33.444 |               |
| chr8  | 125803156 | 125803304 | 0.046879 | -31.70238 | 10 | 8.5714  | 40.274 | Pcnx2         |
| chr8  | 1.15E+08  | 1.15E+08  | 0.046879 | -31.6922  | 14 | 4.4388  | 36.131 | Wwox          |
| chr10 | 80130774  | 80130852  | 0.046879 | -31.45833 | 10 | 2.0833  | 33.542 | Cbarp         |
| chr17 | 56784700  | 56784784  | 0.046879 | -31.41071 | 10 | 2.5476  | 33.958 | Rfx2          |



|       |           |           |          |           |    |         |        |                   |
|-------|-----------|-----------|----------|-----------|----|---------|--------|-------------------|
| chr17 | 49587515  | 49587876  | 0.046879 | -31.4048  | 10 | 4.4286  | 35.833 |                   |
| chr9  | 45439345  | 45439647  | 0.046879 | -31.39285 | 10 | 1.25    | 32.643 | Dscaml1           |
| chr17 | 25855694  | 25855849  | 0.046879 | -31.21018 | 14 | 5.1763  | 36.386 | Wdr90 & Gm26694   |
| chr9  | 60197492  | 60197693  | 0.046879 | -31.17857 | 10 | 3.2619  | 34.44  | Thsd4             |
| chr5  | 1.14E+08  | 1.14E+08  | 0.046879 | -31.0556  | 10 | 8.75    | 39.806 | Ssh1              |
| chr2  | 1.73E+08  | 1.73E+08  | 0.046879 | -31.0476  | 10 | 2.5     | 33.548 |                   |
| chr1  | 134743834 | 134743980 | 0.046879 | -30.93452 | 10 | 2.381   | 33.315 | Syt2              |
| chr9  | 83720499  | 83720873  | 0.046879 | -30.9107  | 10 | 3.006   | 33.917 |                   |
| chr15 | 76070800  | 76070970  | 0.046879 | -30.84172 | 10 | 1.25    | 32.092 | Puf60             |
| chr4  | 132498920 | 132499172 | 0.046879 | -30.78769 | 10 | 4.5833  | 35.371 | Sesn2             |
| chr5  | 139455517 | 139455639 | 0.046879 | -30.78571 | 10 | 1       | 31.786 | 3110082I17Rik     |
| chr3  | 79821517  | 79821740  | 0.046879 | -30.77777 | 10 | 1.25    | 32.028 | Tmem144           |
| chr19 | 47655004  | 47655108  | 0.046879 | -30.76190 | 10 | 4.75    | 35.512 | Col17a1           |
| chr11 | 1.04E+08  | 1.04E+08  | 0.046879 | -30.7608  | 10 | 1.6667  | 32.427 | Mapt              |
| chr9  | 120958803 | 120959838 | 0.046879 | -30.75320 | 16 | 5.1215  | 35.875 | Ctnnb1 & Ulk4     |
| chr13 | 55526301  | 55526802  | 0.046879 | -30.6955  | 10 | 1.25    | 31.946 | Dok3              |
| chr2  | 103732010 | 103732364 | 0.046879 | -30.56944 | 10 | 5       | 35.569 | Nat10             |
| chr3  | 95263917  | 95264640  | 0.046879 | -30.55036 | 10 | 2.5     | 33.05  | Prune1            |
| chr2  | 128191659 | 128192232 | 0.046879 | -30.54166 | 10 | 5.375   | 35.917 | Gm14009 & Gm14005 |
| chr2  | 166074618 | 166074994 | 0.046879 | -30.53174 | 10 | 1.6667  | 32.198 | Sulf2             |
| chr15 | 73092903  | 73093514  | 0.046879 | -30.47619 | 10 | 3.4286  | 33.905 | Chrac1            |
| chr11 | 113279126 | 113279392 | 0.046879 | -30.33333 | 10 | 4.5238  | 34.857 | Slc39a11          |
| chrX  | 7592883   | 7592993   | 0.046879 | -30.30357 | 10 | 0.625   | 30.929 | Foxp3 & Gm36995   |
| chr17 | 73574813  | 73574927  | 0.046879 | -30.29166 | 10 | 3.5119  | 33.804 | Galnt14           |
| chr7  | 45348533  | 45348750  | 0.046879 | -30.28645 | 16 | 1.6667  | 31.953 | Ppfia3            |
| chr7  | 127193815 | 127193929 | 0.046879 | -30.26190 | 10 | 1.6667  | 31.929 | Cd2bp2            |
| chr7  | 29343227  | 29343339  | 0.046879 | -30.2262  | 10 | 0.8333  | 31.06  | Sipa1l3           |
| chr9  | 1.21E+08  | 1.21E+08  | 0.046879 | -30.1964  | 10 | 1.25    | 31.446 |                   |
| chr19 | 46642582  | 46642719  | 0.046879 | -30.1389  | 10 | 2.5     | 32.639 | Wbp1l             |
| chr9  | 1.2E+08   | 1.2E+08   | 0.046879 | -30.0972  | 10 | 2.625   | 32.722 |                   |
| chr17 | 66586077  | 66586303  | 0.046879 | -30.00000 | 10 | 5       | 35     | Themis3           |
| chr8  | 21993128  | 21993537  | 0.046879 | -30.00000 | 10 | 2.5     | 32.5   | Atp7b             |
| chr2  | 35712960  | 35713407  | 0.046879 | -29.9603  | 10 | 1.1111  | 31.071 | Dab2ip            |
| chr7  | 30581656  | 30581676  | 0.046879 | -29.91666 | 10 | 6.25    | 36.167 | Kmt2b             |
| chr5  | 142749794 | 142750217 | 0.046879 | -29.90336 | 10 | 2.8407  | 32.744 | Tnrc18            |
| chr8  | 104594458 | 104594573 | 0.046879 | -29.79166 | 10 | 1.6667  | 31.458 | Pdp2              |
| chr8  | 11518466  | 11518772  | 0.046879 | -29.77777 | 10 | 1.6667  | 31.444 | Cars2             |
| chr10 | 75638832  | 75639045  | 0.046879 | -29.72402 | 10 | 1.5855  | 31.31  | Susd2             |
| chr18 | 38603468  | 38604021  | 0.046879 | -29.71428 | 10 | 2.5     | 32.214 | Arhgap26          |
| chr10 | 119211462 | 119211526 | 0.046879 | -29.66666 | 10 | 1.25    | 30.917 | Cand1             |
| chr1  | 1.34E+08  | 1.34E+08  | 0.046879 | -29.5754  | 10 | 1.8948  | 31.47  |                   |
| chr14 | 70339914  | 70340278  | 0.046879 | -29.56818 | 10 | 5       | 34.568 | Slc39a14          |
| chr1  | 36781122  | 36781199  | 0.046879 | -29.54491 | 10 | 4.9015  | 34.446 | Zap70             |
| chr10 | 80241150  | 80241301  | 0.046879 | -29.53968 | 10 | 6.6667  | 36.206 | Mum1              |
| chr12 | 55564919  | 55565230  | 0.046879 | -29.513   | 11 | 4.5455  | 34.058 |                   |
| chr12 | 84920002  | 84920306  | 0.046879 | -29.44047 | 10 | 0.71429 | 30.155 | Arel1             |
| chr5  | 112425596 | 112425779 | 0.046879 | -29.36507 | 10 | 1.6667  | 31.032 | Sez6l             |
| chr10 | 81499436  | 81499520  | 0.046879 | -29.30096 | 11 | 3.5021  | 32.803 | S1pr4             |
| chr3  | 62817116  | 62817535  | 0.046879 | -29.1667  | 10 | 1.25    | 30.417 |                   |
| chr11 | 1.03E+08  | 1.03E+08  | 0.046879 | -29.119   | 10 | 0.7143  | 29.833 |                   |
| chr8  | 85081666  | 85081962  | 0.046879 | -29.08854 | 16 | 3.125   | 32.214 | Wdr83os           |
| chr8  | 121487675 | 121487903 | 0.046879 | -29.05952 | 10 | 1.6667  | 30.726 | Gm20388           |
| chr19 | 44850217  | 44850468  | 0.046879 | -29.0359  | 10 | 4.095   | 33.131 |                   |
| chr17 | 24674037  | 24674476  | 0.046879 | -28.98015 | 10 | 3.381   | 32.361 | Zfp598            |

|       |           |           |          |           |    |         |        |                                                      |
|-------|-----------|-----------|----------|-----------|----|---------|--------|------------------------------------------------------|
| chr16 | 17877049  | 17877365  | 0.046879 | -28.94047 | 10 | 1.6667  | 30.607 | Gm20518 & DiGeorge syndrome critical region gene 2   |
| chr4  | 150164624 | 150165194 | 0.046879 | -28.75000 | 10 | 1.25    | 30     | Slc2a7                                               |
| chr7  | 1.39E+08  | 1.39E+08  | 0.046879 | -28.6667  | 10 | 8.0833  | 36.75  | 4930543N07Rik                                        |
| chr8  | 14532798  | 14533358  | 0.046879 | -28.66666 | 10 | 0.83333 | 29.5   | Dlgap2                                               |
| chr18 | 84208841  | 84209019  | 0.046879 | -28.64682 | 10 | 1.7143  | 30.361 | Zfp407                                               |
| chr11 | 118519355 | 118519637 | 0.046879 | -28.55952 | 10 | 1.5476  | 30.107 | Rbfox3                                               |
| chr6  | 113948459 | 113948819 | 0.046879 | -28.54166 | 10 | 3.5417  | 32.083 | Atp2b2                                               |
| chr13 | 55936426  | 55937299  | 0.046879 | -28.4647  | 16 | 3.4959  | 31.961 |                                                      |
| chr17 | 8981799   | 8982033   | 0.046879 | -28.4643  | 10 | 1.25    | 29.714 | Pde10a                                               |
| chr7  | 28616800  | 28617132  | 0.046879 | -28.30086 | 11 | 1.1364  | 29.437 | Acp7                                                 |
| chr1  | 128286341 | 128286579 | 0.046879 | -28.29166 | 10 | 3.125   | 31.417 | Lct                                                  |
| chr15 | 94001325  | 94001749  | 0.046879 | -28.2738  | 14 | 2.6786  | 30.952 |                                                      |
| chr9  | 1.08E+08  | 1.08E+08  | 0.046879 | -28.1618  | 10 | 5.2976  | 33.459 | Rnf123 & Gm20529                                     |
| chr14 | 25524199  | 25524366  | 0.046879 | -28.01641 | 10 | 1.6667  | 29.683 | Zmiz1                                                |
| chr4  | 14290709  | 14291081  | 0.046879 | -27.9821  | 10 | 5       | 32.982 |                                                      |
| chr3  | 1.52E+08  | 1.52E+08  | 0.046879 | -27.9583  | 10 | 3.125   | 31.083 |                                                      |
| chr16 | 31548185  | 31548604  | 0.046879 | -27.75    | 10 | 5       | 32.75  |                                                      |
| chr5  | 1.14E+08  | 1.14E+08  | 0.046879 | -27.6541  | 16 | 1.2277  | 28.882 | Mvk                                                  |
| chr11 | 55495299  | 55495411  | 0.046879 | -27.58928 | 10 | 3.125   | 30.714 | G3bp1                                                |
| chr12 | 36372365  | 36373184  | 0.046879 | -27.4246  | 10 | 3.75    | 31.175 |                                                      |
| chr19 | 6375521   | 6375625   | 0.046879 | -27.4048  | 10 | 11.524  | 38.929 | Sf1                                                  |
| chr7  | 126947083 | 126947622 | 0.046879 | -27.40277 | 10 | 0.625   | 28.028 | Asphd1 & Gm21984                                     |
| chr1  | 91499924  | 91500380  | 0.046879 | -27.39285 | 10 | 1.25    | 28.643 | Traf3ip1                                             |
| chr17 | 87346162  | 87346349  | 0.046879 | -27.3214  | 10 | 5.3571  | 32.679 | Ttc7                                                 |
| chr19 | 43043320  | 43043536  | 0.046879 | -27.2262  | 10 | 5       | 32.226 | Hpse2                                                |
| chr8  | 106264584 | 106264749 | 0.046879 | -27.21428 | 10 | 0.83333 | 28.048 | Gm26786 & sphingomyelin phosphodiesterase 3, neutral |
| chr10 | 4130197   | 4130465   | 0.046879 | -27.12698 | 10 | 3.0754  | 30.202 | Mthfd1l                                              |
| chr11 | 52662065  | 52662341  | 0.046879 | -27.1131  | 14 | 0.4464  | 27.56  |                                                      |
| chr6  | 1.44E+08  | 1.44E+08  | 0.046879 | -27.0876  | 14 | 0.4464  | 27.534 | Sox5                                                 |
| chr19 | 58809501  | 58809596  | 0.046879 | -27.0119  | 10 | 2.5     | 29.512 | Hspa12a                                              |
| chr13 | 38694502  | 38694789  | 0.046879 | -27       | 10 | 4.1667  | 31.167 |                                                      |
| chr14 | 70117359  | 70117997  | 0.046879 | -26.99724 | 11 | 2.2727  | 29.27  | Bin3                                                 |
| chr9  | 45942668  | 45942822  | 0.046879 | -26.95436 | 10 | 2.5     | 29.454 | Sidt2                                                |
| chr9  | 44580294  | 44580786  | 0.046879 | -26.75    | 10 | 1.25    | 28     | Gm47230                                              |
| chr3  | 124291885 | 124292295 | 0.046879 | -26.61904 | 10 | 1.25    | 27.869 | Gm9372 & Gm43731                                     |
| chr7  | 99717821  | 99718057  | 0.046879 | -26.5714  | 10 | 1.25    | 27.821 |                                                      |
| chr2  | 167611058 | 167611670 | 0.046879 | -26.56318 | 10 | 1.6667  | 28.23  | Ube2v1 & Gm20431                                     |
| chr16 | 92106583  | 92106662  | 0.046879 | -26.54365 | 10 | 3.4722  | 30.016 | Mrps6 & AC144408.3                                   |
| chr7  | 122006344 | 122006676 | 0.046879 | -26.54155 | 11 | 1.1364  | 27.678 | Gga2                                                 |
| chr8  | 117605347 | 117606060 | 0.046879 | -26.48122 | 26 | 4.9061  | 31.387 | Plcg2                                                |
| chr15 | 81008240  | 81008360  | 0.046879 | -26.34859 | 10 | 6.6667  | 33.015 | Sgsm3                                                |
| chr7  | 107731054 | 107731508 | 0.046879 | -26.30952 | 10 | 6.6667  | 32.976 | Ppfilbp2                                             |
| chr9  | 120057308 | 120057513 | 0.046879 | -26.23809 | 10 | 1       | 27.238 | Cx3cr1                                               |
| chr11 | 118482777 | 118482946 | 0.046879 | -26.22096 | 10 | 1.1111  | 27.332 | Engase                                               |
| chrX  | 99321849  | 99322233  | 0.046879 | -26.2024  | 10 | 5.4762  | 31.679 |                                                      |
| chr2  | 168636006 | 168636326 | 0.046879 | -26.16305 | 10 | 5.4545  | 31.618 | Atp9a                                                |
| chr2  | 26392525  | 26392633  | 0.046879 | -26.15476 | 10 | 0.83333 | 26.988 | Pmpca                                                |

|       |           |           |          |           |    |         |        |                           |
|-------|-----------|-----------|----------|-----------|----|---------|--------|---------------------------|
| chr2  | 31420179  | 31420352  | 0.046879 | -26.15046 | 11 | 2.8409  | 28.991 | Hmcn2                     |
| chr10 | 62967293  | 62967526  | 0.046879 | -26.1369  | 10 | 1.25    | 27.387 | Dna2                      |
| chr8  | 88918393  | 88918689  | 0.046879 | -26.0833  | 10 | 6       | 32.083 |                           |
| chr7  | 122625928 | 122626740 | 0.046879 | -26.04166 | 16 | 5.2083  | 31.25  | Prkcb                     |
| chr5  | 37112895  | 37113011  | 0.046879 | -25.9286  | 10 | 4.7619  | 30.69  | Jakmip1 &<br>Gm1043       |
| chr12 | 4682147   | 4682581   | 0.046879 | -25.78968 | 10 | 1.25    | 27.04  | Itsn2                     |
| chr11 | 103345332 | 103345693 | 0.046879 | -25.76221 | 10 | 3.4045  | 29.167 | Arhgap27os3 &<br>Arhgap27 |
| chr11 | 120064863 | 120065200 | 0.046879 | -25.76082 | 10 | 0.71429 | 26.475 | Cep131                    |
| chr5  | 108332688 | 108333332 | 0.046879 | -25.72817 | 10 | 0.625   | 26.353 | Pigg                      |
| chr4  | 1.32E+08  | 1.32E+08  | 0.046879 | -25.7224  | 22 | 4.2424  | 29.965 | Ptpu                      |
| chr5  | 113764022 | 113764167 | 0.046879 | -25.64285 | 10 | 6.7857  | 32.429 | Sart3                     |
| chr18 | 69564544  | 69564773  | 0.046879 | -25.631   | 10 | 1       | 26.631 | Tcf4                      |
| chr11 | 78897252  | 78897697  | 0.046879 | -25.6111  | 10 | 2.2619  | 27.873 |                           |
| chr4  | 1.08E+08  | 1.08E+08  | 0.046879 | -25.5736  | 11 | 2.2727  | 27.846 | Lrp8                      |
| chr3  | 153349918 | 153350014 | 0.046879 | -25.55952 | 10 | 3.3333  | 28.893 | St6galnac3                |
| chr8  | 109557755 | 109557938 | 0.046879 | -25.49873 | 10 | 5       | 30.499 | Dhx38                     |
| chr13 | 92757999  | 92758031  | 0.046879 | -25.27777 | 10 | 5.5556  | 30.833 | Thbs4                     |
| chr9  | 108849428 | 108849567 | 0.046879 | -25.26599 | 10 | 3.2697  | 28.536 | Celsr3                    |
| chr8  | 13668670  | 13668945  | 0.046879 | -25.20833 | 10 | 0.83333 | 26.042 | Rasa3                     |
| chr18 | 69506861  | 69507160  | 0.046879 | -25.16666 | 10 | 5       | 30.167 | Tcf4                      |
| chr10 | 70169288  | 70169566  | 0.046879 | -25.15331 | 11 | 12.626  | 37.78  | Ccdc6                     |
| chr15 | 74958296  | 74958578  | 0.046879 | -25.05657 | 11 | 1.9751  | 27.032 | Ly6e                      |
| chr3  | 144447084 | 144447239 | 0.046879 | -25.04761 | 10 | 1.25    | 26.298 | Hs2st1                    |
| chr5  | 1.24E+08  | 1.24E+08  | 0.046879 | -25.0437  | 10 | 0.4167  | 25.46  | Pitpnm2                   |
| chr7  | 126445125 | 126445264 | 0.046879 | -25.02597 | 10 | 1.4286  | 26.455 | Rabep2                    |
| chr10 | 1.11E+08  | 1.11E+08  | 0.046879 | -24.9762  | 10 | 10      | 34.976 | E2f7                      |
| chr17 | 25744604  | 25744792  | 0.046879 | -24.93686 | 10 | 1.4583  | 26.395 | Mslnl                     |
| chr15 | 95228914  | 95229072  | 0.046879 | -24.93213 | 16 | 2.0833  | 27.015 | Nell2                     |
| chr11 | 29069697  | 29069886  | 0.046879 | -24.9047  | 10 | 2.9167  | 27.821 |                           |
| chr15 | 79373494  | 79373853  | 0.046879 | -24.88095 | 10 | 0.83333 | 25.714 | Tmem184b                  |
| chr5  | 140463343 | 140463748 | 0.046879 | -24.83820 | 10 | 4.9286  | 29.767 | Gm4869                    |
| chr17 | 86700021  | 86700661  | 0.046879 | -24.7848  | 10 | 0.8333  | 25.618 |                           |
| chr8  | 111628525 | 111628629 | 0.046879 | -24.75198 | 14 | 3.9087  | 28.661 | Ldhd                      |
| chr7  | 34245025  | 34245619  | 0.046879 | -24.62585 | 14 | 2.8316  | 27.457 | 4931406P16Rik             |
| chr9  | 21093223  | 21093685  | 0.046879 | -24.601   | 18 | 6.6667  | 31.268 | 1700084C06Rik             |
| chr11 | 101599022 | 101599699 | 0.046879 | -24.52448 | 16 | 4.0451  | 28.57  | Gm11634                   |
| chr4  | 137715910 | 137716099 | 0.046879 | -24.51959 | 10 | 2.5     | 27.02  | Rap1gap                   |
| chr2  | 151858178 | 151858632 | 0.046879 | -24.43650 | 10 | 1.6667  | 26.103 | Rspo4                     |
| chr11 | 61703284  | 61703457  | 0.046879 | -24.41666 | 10 | 5       | 29.417 | Slc5a10 & Fam83g          |
| chr6  | 39466721  | 39466945  | 0.046879 | -24.41450 | 10 | 5       | 29.415 | Dennd2a                   |
| chr7  | 67693043  | 67693282  | 0.046879 | -24.36904 | 10 | 1.25    | 25.619 | Ttc23                     |
| chr19 | 6493294   | 6493664   | 0.046879 | -24.3344  | 11 | 0.9091  | 25.244 | Nrxn2                     |
| chr7  | 141400680 | 141401128 | 0.046879 | -24.32142 | 10 | 2.9167  | 27.238 | Taldo1                    |
| chr15 | 58219868  | 58219980  | 0.046879 | -24.18452 | 10 | 1.6667  | 25.851 | Gm15943                   |
| chrX  | 161718145 | 161718434 | 0.046879 | -24.17857 | 10 | 2.9167  | 27.095 | Rai2                      |
| chr15 | 84639387  | 84639604  | 0.046879 | -24.1647  | 10 | 0.8333  | 24.998 |                           |
| chr2  | 1.51E+08  | 1.51E+08  | 0.046879 | -24.125   | 10 | 1.6667  | 25.792 | Pygb                      |
| chr10 | 127333578 | 127333729 | 0.046879 | -23.87682 | 16 | 0.96726 | 24.844 | Gli1 & Gm47200            |
| chr4  | 119255773 | 119256640 | 0.046879 | -23.83297 | 22 | 7.9924  | 31.825 | Gm12927 &<br>Cldn19       |
| chr15 | 87555915  | 87556181  | 0.046879 | -23.78826 | 14 | 1.3138  | 25.102 | Fam19a5                   |
| chr15 | 76105939  | 76106542  | 0.046879 | -23.57978 | 19 | 1.2427  | 24.822 | Eppk1                     |
| chr5  | 143268793 | 143269040 | 0.046879 | -23.57539 | 10 | 2.5     | 26.075 | Zfp316                    |
| chr13 | 12499850  | 12499986  | 0.046879 | -23.50000 | 10 | 7       | 30.5   | Edaradd                   |
| chr7  | 29023520  | 29023757  | 0.046879 | -23.49422 | 10 | 1.3889  | 24.883 | Ryr1                      |
| chr17 | 25491485  | 25491588  | 0.046879 | -23.3126  | 10 | 1.25    | 24.563 | Sstr5                     |

|       |           |           |          |           |    |         |        |                  |
|-------|-----------|-----------|----------|-----------|----|---------|--------|------------------|
| chr7  | 16218655  | 16218840  | 0.046879 | -23.28571 | 10 | 0.71429 | 24     | Dhx34            |
| chr11 | 88348907  | 88348943  | 0.046879 | -23.2361  | 10 | 5.6944  | 28.931 | Msi2             |
| chr8  | 95095391  | 95095815  | 0.046879 | -23.1526  | 26 | 6.3721  | 29.525 | Katnb1           |
| chrX  | 9572021   | 9572639   | 0.046879 | -23.10119 | 10 | 0.625   | 23.726 | H2a1o            |
| chr11 | 121513605 | 12151421  | 0.046879 | -23.07837 | 10 | 0.55556 | 23.634 | Zfp750 & Tbcd    |
| chr10 | 116448010 | 116448383 | 0.046879 | -23.03571 | 10 | 0.71429 | 23.75  | Kcnmb4           |
| chr10 | 40999589  | 40999790  | 0.046879 | -22.8869  | 10 | 3.3333  | 26.22  |                  |
| chr17 | 28155529  | 28155801  | 0.046879 | -22.8269  | 10 | 7.113   | 29.94  | Scube3           |
| chr12 | 85221450  | 85221651  | 0.046879 | -22.78210 | 10 | 1.2879  | 24.07  | Eif2b2           |
| chr10 | 8488731   | 8489589   | 0.046879 | -22.75    | 10 | 1.6667  | 24.417 | Ust              |
| chr7  | 25225805  | 25225909  | 0.046879 | -22.7341  | 10 | 0.8333  | 23.567 | Zfp526           |
| chr11 | 32067398  | 32067832  | 0.046879 | -22.6786  | 10 | 6.25    | 28.929 |                  |
| chr4  | 154581103 | 154581283 | 0.046879 | -22.64285 | 10 | 1.25    | 23.893 | Prdm16           |
| chrX  | 139808832 | 139809041 | 0.046879 | -22.55808 | 10 | 1.4286  | 23.987 | Cldn2            |
| chr10 | 41629961  | 41630094  | 0.046879 | -22.4874  | 11 | 0.9091  | 23.396 | Ccdc162          |
| chr19 | 56905460  | 56906394  | 0.046879 | -22.31241 | 22 | 1.7893  | 24.102 | Vwa2             |
| chr18 | 54899047  | 54899306  | 0.046879 | -22.30663 | 10 | 4.3452  | 26.652 | Zfp608           |
| chr12 | 1.08E+08  | 1.08E+08  | 0.046879 | -22.1478  | 16 | 1.5625  | 23.71  | Bcl11b           |
| chr4  | 1.25E+08  | 1.25E+08  | 0.046879 | -22.1429  | 10 | 3.2143  | 25.357 | Epha10           |
| chr16 | 10417538  | 10418236  | 0.046879 | -22.097   | 16 | 0.8929  | 22.99  | Nubp1            |
| chr5  | 112160914 | 112161361 | 0.046879 | -21.98809 | 10 | 1.4286  | 23.417 | 1700016B01Rik    |
| chr9  | 58578624  | 58579712  | 0.046879 | -21.8939  | 11 | 4.5455  | 26.439 |                  |
| chr10 | 56388488  | 56388655  | 0.046879 | -21.83134 | 10 | 4.2361  | 26.067 | Gja1             |
| chr7  | 19400616  | 19401211  | 0.046879 | -21.83106 | 14 | 5.6293  | 27.46  | Klc3             |
| chr9  | 21402663  | 21402904  | 0.046879 | -21.63385 | 10 | 1.6667  | 23.301 | Ilf3             |
| chr4  | 1.41E+08  | 1.41E+08  | 0.046879 | -21.6006  | 11 | 1.2987  | 22.899 | Hspb7            |
| chr2  | 27227052  | 27227214  | 0.046879 | -21.53113 | 10 | 1.6667  | 23.198 | Sardh & Sardhos  |
| chr19 | 23508163  | 23508478  | 0.046879 | -21.5238  | 10 | 2.5     | 24.024 |                  |
| chr11 | 94988088  | 94988253  | 0.046879 | -21.5159  | 10 | 1.25    | 22.766 |                  |
| chr10 | 58738216  | 58738907  | 0.046879 | -21.4918  | 16 | 3.3854  | 24.877 |                  |
| chr11 | 113869836 | 113870501 | 0.046879 | -21.43939 | 11 | 3.7879  | 25.227 | Sdk2             |
| chr3  | 146438758 | 146438941 | 0.046879 | -21.41666 | 10 | 6.0833  | 27.5   | Ssx2ip           |
| chr1  | 189798790 | 189799306 | 0.046879 | -21.26190 | 20 | 3.5833  | 24.845 | Ptpn14           |
| chr9  | 120018910 | 120019092 | 0.046879 | -21.25992 | 16 | 6.653   | 27.913 | Xirp1 & Cx3cr1   |
| chr2  | 167996149 | 167996287 | 0.046879 | -21.25595 | 10 | 1.6667  | 22.923 | Ripor3           |
| chr19 | 5672786   | 5673281   | 0.046879 | -21.16883 | 11 | 8.1061  | 29.275 | Pcnx3            |
| chr14 | 69877909  | 69878004  | 0.046879 | -21.10714 | 10 | 1       | 22.107 | Pebp4            |
| chr5  | 32944032  | 32944929  | 0.046879 | -21.05615 | 10 | 6       | 27.056 | Depdc5           |
| chr8  | 110730059 | 110730186 | 0.046879 | -20.91071 | 10 | 2.5     | 23.411 | Mtss1l           |
| chr6  | 99006984  | 99007298  | 0.046879 | -20.87719 | 19 | 1.3158  | 22.193 | Foxp1            |
| chr2  | 6440640   | 6440988   | 0.046879 | -20.7875  | 16 | 1.5625  | 22.35  | Usp6nl           |
| chr5  | 1.13E+08  | 1.13E+08  | 0.046879 | -20.621   | 10 | 5       | 25.621 |                  |
| chr18 | 82518109  | 82518157  | 0.046879 | -20.61309 | 10 | 1.6667  | 22.28  | Mbp              |
| chr2  | 26992960  | 26993283  | 0.046879 | -20.5617  | 10 | 2.1726  | 22.734 | Adamts13         |
| chr8  | 124564597 | 12456491  | 0.046879 | -20.51785 | 10 | 1.9643  | 22.482 | Agt              |
| chr4  | 141903759 | 141903998 | 0.046879 | -20.49007 | 10 | 2.4567  | 22.947 | Fhad1            |
| chr5  | 111753054 | 111753216 | 0.046879 | -20.41666 | 10 | 2.5     | 22.917 | E130006D01Rik    |
| chr7  | 3181186   | 3181266   | 0.046879 | -20.41161 | 10 | 4.7551  | 25.167 | Gm3375           |
| chr8  | 72686928  | 72687193  | 0.046879 | -20.30257 | 10 | 3.5417  | 23.844 | Nwd1             |
| chr7  | 143390459 | 143390614 | 0.046879 | -20.18650 | 10 | 4.0556  | 24.242 | Kcnq1            |
| chr15 | 86126493  | 86126881  | 0.046879 | -20.1605  | 11 | 1.3384  | 21.499 | Gramd4           |
| chr11 | 59080117  | 59080180  | 0.046879 | -19.996   | 10 | 9.1667  | 29.163 | Obscn            |
| chr17 | 32135393  | 32135896  | 0.046879 | -19.94791 | 16 | 1.0417  | 20.99  | Gm17276 & Notch3 |
| chr10 | 99274978  | 99275271  | 0.046879 | -19.91666 | 10 | 1.25    | 21.167 | Gm48089          |
| chr9  | 78704570  | 78705084  | 0.046879 | -19.65999 | 22 | 3.8817  | 23.542 | Cd109            |
| chr2  | 33242094  | 33243137  | 0.046879 | -19.56259 | 22 | 1.2121  | 20.775 | Angptl2 &        |
| chr10 | 43510043  | 43510446  | 0.046879 | -19.5605  | 27 | 4.4496  | 24.01  | Bend3            |

|       |           |           |          |           |    |         |        |                 |
|-------|-----------|-----------|----------|-----------|----|---------|--------|-----------------|
| chr2  | 173158399 | 173158584 | 0.046879 | -19.54573 | 19 | 1.9841  | 21.53  | Pck1            |
| chr1  | 84912655  | 84913337  | 0.046879 | -19.40886 | 29 | 2.1689  | 21.578 | Slc16a14        |
| chr11 | 82370015  | 82370292  | 0.046879 | -19.4048  | 10 | 3.5     | 22.905 |                 |
| chr2  | 118873234 | 118873428 | 0.046879 | -19.37500 | 10 | 3.3333  | 22.708 | Ivd             |
| chr1  | 1.61E+08  | 1.61E+08  | 0.046879 | -19.1667  | 10 | 2.5     | 21.667 | Zbtb37          |
| chr8  | 1.2E+08   | 1.2E+08   | 0.046879 | -19.1593  | 16 | 1.2277  | 20.387 | Gse1 & Gm20388  |
| chr5  | 110602921 | 110603414 | 0.046879 | -19.02381 | 10 | 1.7361  | 20.76  | Galnt9          |
| chr2  | 93533369  | 93533612  | 0.046879 | -18.9131  | 10 | 1.6667  | 20.58  |                 |
| chr2  | 156489064 | 156489600 | 0.046879 | -18.87500 | 10 | 6.4583  | 25.333 | Epb4111         |
| chr4  | 42956741  | 42956963  | 0.046879 | -18.84800 | 26 | 7.9227  | 26.771 | Dnajb5          |
| chr15 | 77995104  | 77995184  | 0.046879 | -18.79670 | 10 | 2.5     | 21.297 | Cacng2          |
| chr17 | 14195901  | 14195957  | 0.046879 | -18.75595 | 10 | 1.4286  | 20.185 | Dact2           |
| chr16 | 18950916  | 18951514  | 0.046879 | -18.69446 | 11 | 0.90909 | 19.604 | Hira & Gm28539  |
| chr9  | 78042879  | 78043667  | 0.046879 | -18.2187  | 27 | 5.787   | 24.006 |                 |
| chr8  | 95709212  | 95709549  | 0.046879 | -18.16575 | 10 | 1.6111  | 19.777 | Ndrgr4          |
| chr10 | 22696235  | 22696369  | 0.046879 | -17.90476 | 10 | 1       | 18.905 | Slc2a12         |
| chr11 | 4737808   | 4737946   | 0.046879 | -17.8694  | 14 | 1.1054  | 18.975 | Cabp7           |
| chr10 | 81315979  | 81316167  | 0.046879 | -17.82539 | 10 | 1       | 18.825 | Pip5k1c         |
| chr18 | 56739565  | 56739921  | 0.046879 | -17.6448  | 10 | 7.3571  | 25.002 | Lmnb1           |
| chr15 | 25920927  | 25921487  | 0.046879 | -17.64224 | 10 | 3.2143  | 20.857 | Retreg1         |
| chr11 | 1.03E+08  | 1.03E+08  | 0.046879 | -17.6154  | 10 | 0.5556  | 18.171 |                 |
| chr16 | 94267880  | 94267948  | 0.046879 | -17.53156 | 10 | 0.45455 | 17.986 | Hlcs            |
| chr9  | 106223928 | 106224158 | 0.046879 | -17.44083 | 10 | 0.625   | 18.066 | Tlr9            |
| chr9  | 21438467  | 21438900  | 0.046879 | -17.37500 | 10 | 3.25    | 20.625 | Dnm2            |
| chr7  | 141863914 | 141864232 | 0.046879 | -17.33928 | 10 | 1.25    | 18.589 | Muc5b           |
| chr11 | 68892672  | 68892757  | 0.046879 | -17.32738 | 10 | 0.625   | 17.952 | Rnf222          |
| chr4  | 155342159 | 155342742 | 0.046879 | -17.27381 | 10 | 2.5476  | 19.821 | Prkcz           |
| chr19 | 58913794  | 58913947  | 0.046879 | -17.1806  | 10 | 6       | 23.181 |                 |
| chr10 | 95110823  | 95111124  | 0.046879 | -16.9119  | 23 | 17.346  | 34.258 |                 |
| chr17 | 32357884  | 32358529  | 0.046879 | -16.85993 | 27 | 5.3755  | 22.235 | Wiz             |
| chr7  | 16907159  | 16907249  | 0.046879 | -16.64087 | 10 | 7.4167  | 24.058 | Ptgir           |
| chr11 | 102018639 | 102018867 | 0.046879 | -16.56903 | 16 | 3.0506  | 19.62  | Mpp3            |
| chr2  | 36242904  | 36244293  | 0.046879 | -16.45600 | 29 | 3.5345  | 19.99  | Ptgs1           |
| chr11 | 79686522  | 79686656  | 0.046879 | -16.24591 | 19 | 1.4035  | 17.649 | Rab11fip4       |
| chr5  | 110378002 | 110378250 | 0.046879 | -16.15740 | 18 | 0.46296 | 16.62  | Fbrs1           |
| chr19 | 5047812   | 5048006   | 0.046879 | -15.96836 | 10 | 5.6515  | 21.62  | Brms1           |
| chr7  | 67693320  | 67693481  | 0.046879 | -15.85813 | 16 | 8.75    | 24.608 | Ttc23           |
| chr17 | 34802733  | 34802978  | 0.046879 | -15.83333 | 10 | 1.6667  | 17.5   | Cyp21a1         |
| chr10 | 76436437  | 76436499  | 0.046879 | -15.72916 | 16 | 3.125   | 18.854 | Pcnt            |
| chr10 | 79974483  | 79974668  | 0.046879 | -15.68121 | 18 | 4.9405  | 20.622 | Grin3b          |
| chr15 | 101373193 | 101373638 | 0.046879 | -15.62418 | 22 | 3.0186  | 18.643 | Gm35853         |
| chr4  | 1.29E+08  | 1.29E+08  | 0.046879 | -15.2014  | 14 | 3.6905  | 18.892 | Phc2            |
| chr11 | 97104151  | 97104499  | 0.046879 | -15.10328 | 10 | 5.6029  | 20.706 | Tbx21           |
| chr7  | 24936601  | 24937001  | 0.046879 | -14.88807 | 10 | 1.2879  | 16.176 | Gm4881          |
| chr17 | 31912548  | 31912761  | 0.046879 | -14.6863  | 16 | 1.4967  | 16.183 |                 |
| chr2  | 1.7E+08   | 1.7E+08   | 0.046879 | -14.0357  | 10 | 1.6667  | 15.702 |                 |
| chr2  | 169885906 | 169886059 | 0.046879 | -13.93140 | 10 | 2.6786  | 16.61  | Tshz2 & Gm26883 |
| chr12 | 113161515 | 113161857 | 0.046879 | -13.57034 | 10 | 3.5     | 17.07  | Tedc1           |
| chr5  | 122115066 | 122115370 | 0.046879 | -13.20560 | 16 | 1.5625  | 14.768 | Ccdc63          |
| chr11 | 94667150  | 94667273  | 0.046879 | -13.09127 | 10 | 5.1389  | 18.23  | Xylt2           |
| chr17 | 30744562  | 30744609  | 0.046879 | -12.36111 | 10 | 7.1429  | 19.504 | Dnah8           |
| chr11 | 118886553 | 118886789 | 0.046879 | -11.71266 | 10 | 2.5     | 14.213 | Rbfox3          |
| chr2  | 1.68E+08  | 1.68E+08  | 0.046886 | -24.9645  | 19 | 1.4912  | 26.456 |                 |
| chr7  | 45350068  | 45350821  | 0.047021 | -33.3772  | 19 | 1.8045  | 35.182 | Ppfia3          |
| chr4  | 132204160 | 132204764 | 0.047021 | -28.92272 | 29 | 1.4943  | 30.417 | Ythdf2          |
| chr13 | 35064370  | 35065211  | 0.047463 | -29.15079 | 15 | 1.3333  | 30.484 | Gm40910         |
| chr2  | 29812311  | 29812617  | 0.04858  | -29.58749 | 13 | 12.729  | 42.316 | Slc27a4         |
| chr4  | 1.48E+08  | 1.48E+08  | 0.04858  | -22.5427  | 13 | 4.8504  | 27.393 |                 |

|       |           |           |          |           |    |        |        |                    |
|-------|-----------|-----------|----------|-----------|----|--------|--------|--------------------|
| chr5  | 1.4E+08   | 1.4E+08   | 0.04858  | -19.3619  | 31 | 5.5191 | 24.881 | Ints1              |
| chr14 | 31138856  | 31139038  | 0.048908 | -33.49810 | 23 | 8.1884 | 41.687 | Nt5dc2 & Stab1     |
| chr5  | 135532253 | 135532594 | 0.049086 | -13.83022 | 23 | 2.9348 | 16.765 | Hip1               |
| chr7  | 19394302  | 19394508  | 0.049102 | -17.23612 | 17 | 5.0468 | 22.283 | Ercc2 & Klc3       |
| chr12 | 100301674 | 10030181  | 0.049188 | -12.78873 | 13 | 1.9231 | 14.712 | Gm10432 & Ttc7b    |
| chr1  | 75624213  | 75624553  | 0.049255 | -33.3392  | 13 | 3.007  | 36.346 |                    |
| chr8  | 11124360  | 11124865  | 0.049666 | -35.4579  | 13 | 2.8846 | 38.342 |                    |
| chr17 | 29570382  | 29570789  | 0.049687 | -23.14273 | 24 | 3.5764 | 26.719 | Tbc1d22b & Gm28052 |
| chr11 | 94911295  | 94911894  | 0.049714 | -34.6154  | 13 | 0.9615 | 35.577 |                    |
| chr9  | 47091928  | 47092568  | 0.049832 | -30.50303 | 17 | 3.1489 | 33.652 | Gm31698            |
| chr1  | 39453913  | 39454128  | 0.049896 | -24.25    | 15 | 2.8333 | 27.083 | Tbc1d8             |
| chr7  | 1.22E+08  | 1.22E+08  | 0.0499   | -30.5495  | 13 | 8.0128 | 38.562 |                    |
| chr2  | 1.56E+08  | 1.56E+08  | 0.049941 | -30.9341  | 13 | 5.0366 | 35.971 | Acss2 & Gss        |
| chr9  | 1.08E+08  | 1.08E+08  | 0.049941 | -21.004   | 15 | 5.9246 | 26.929 | Camkv              |
| chr1  | 1.41E+08  | 1.41E+08  | 0.049954 | -33.6722  | 13 | 2.9487 | 36.621 |                    |

**Identified 201 hypo-DMRs between ND and HFD fetal oocyte at E13.5.**

| dmr_chrom | dmr_start | dmr_end   | qval      | diff      | cpgs | mean_ND | mean_HFD | genes_name                                     |
|-----------|-----------|-----------|-----------|-----------|------|---------|----------|------------------------------------------------|
| chr6      | 30738030  | 30738286  | 1.0656e-1 | 18.259804 | 51   | 19.894  | 1.634    | Mest                                           |
| chr7      | 126759632 | 126759724 | 0.0001117 | 68.055556 | 12   | 72.222  | 4.1667   | Mapk3                                          |
| chr16     | 11144062  | 11144141  | 0.0001482 | 5.628299  | 34   | 12.484  | 6.8553   | Gm23935 & zinc finger CCCH type containing 7 A |
| chr11     | 51436536  | 51436656  | 0.0003618 | 54.259259 | 12   | 55.926  | 1.6667   | Col23a1                                        |
| chr3      | 1.12E+08  | 1.12E+08  | 0.000397  | 61.98413  | 15   | 65.833  | 3.8492   |                                                |
| chr9      | 75347883  | 75348030  | 0.0004754 | 18.974359 | 26   | 24.038  | 5.0641   | Bcl2l10                                        |
| chr5      | 36973835  | 36974044  | 0.0005755 | 34.144491 | 17   | 39.733  | 5.5882   | Wfs1                                           |
| chr17     | 10389591  | 10389632  | 0.00059   | 45.11905  | 21   | 58.214  | 13.095   |                                                |
| chr16     | 11144021  | 11144062  | 0.0008451 | 8.308586  | 10   | 15.861  | 7.5525   | Zc3h7a                                         |
| chr6      | 90905316  | 90905645  | 0.0009299 | 77.777778 | 15   | 79.444  | 1.6667   | Iqsec1                                         |
| chr8      | 121784949 | 121785039 | 0.0010365 | 26.091270 | 12   | 27.272  | 1.1806   | Jph3 & Gm20388                                 |
| chr19     | 4103309   | 4103482   | 0.001037  | 13.87756  | 16   | 14.919  | 1.0417   | Pitpnm1                                        |
| chr16     | 17734137  | 17734214  | 0.0010366 | 25.257937 | 12   | 26.925  | 1.6667   | AC087802.4                                     |
| chr5      | 122432655 | 122432786 | 0.0014756 | 37.458333 | 10   | 38.083  | 0.625    | Anapc7                                         |
| chr6      | 112722888 | 112723060 | 0.0016747 | 29.272727 | 15   | 29.828  | 0.55556  | Srgap3                                         |
| chrY      | 90761708  | 90761827  | 0.0016747 | 38.303999 | 19   | 48.163  | 9.8591   | Mid1-ps1                                       |
| chr1      | 191615720 | 191615923 | 0.0017613 | 42.070578 | 14   | 44.048  | 1.977    | Ints7                                          |
| chr5      | 142886491 | 142886716 | 0.0018528 | 13.082011 | 18   | 16.118  | 3.0357   | Fbxl18                                         |
| chr17     | 12741368  | 12741531  | 0.001889  | 23.39286  | 18   | 24.782  | 1.3889   | Igf2r & Airn                                   |
| chr17     | 23819922  | 23820109  | 0.0021919 | 29.180958 | 20   | 43.808  | 14.627   | Srrm2                                          |
| chr12     | 1.1E+08   | 1.1E+08   | 0.002497  | 12.15079  | 10   | 16.794  | 4.6429   |                                                |
| chr5      | 136100837 | 136100962 | 0.0024971 | 27.579365 | 10   | 28.413  | 0.83333  | Rasa4                                          |
| chr12     | 1.05E+08  | 1.05E+08  | 0.002497  | 28.83333  | 15   | 29.667  | 0.8333   | Gm47648                                        |
| chr13     | 59115430  | 59115665  | 0.0024971 | 31.282596 | 14   | 33.316  | 2.0337   | Ntrk2                                          |
| chrY      | 90742656  | 90742864  | 0.002639  | 22.11271  | 30   | 59.848  | 37.736   |                                                |
| chr7      | 127136262 | 127136430 | 0.0026416 | 30.051407 | 12   | 40.468  | 10.417   | Spn                                            |
| chrX      | 39694801  | 39694884  | 0.002642  | 49.36673  | 12   | 58.742  | 9.375    |                                                |
| chr9      | 75528426  | 75528720  | 0.0026496 | 31.005291 | 18   | 37.533  | 6.5278   | Tmod3                                          |
| chr16     | 93757138  | 93757295  | 0.002681  | 26.25676  | 12   | 29.729  | 3.4722   | Dop1b                                          |
| chr19     | 35584700  | 35585124  | 0.002681  | 45.87912  | 13   | 51.007  | 5.1282   |                                                |
| chr4      | 118212350 | 118212496 | 0.002685  | 24.214108 | 12   | 25.047  | 0.83333  | Ptprf                                          |
| chr10     | 126008428 | 126008607 | 0.0040315 | 27.669753 | 18   | 30.633  | 2.963    | Lrig3                                          |
| chr7      | 118757020 | 118757296 | 0.0042119 | 52.852564 | 13   | 66.667  | 13.814   | Vps35l                                         |
| chrX      | 58911421  | 58911672  | 0.0045488 | 24.083333 | 10   | 26.083  | 2        | 4930550L24Rik                                  |
| chr1      | 1.61E+08  | 1.61E+08  | 0.004549  | 29.55646  | 10   | 33.396  | 3.8393   | Rabgap1l                                       |
| chr15     | 75657874  | 75657991  | 0.0045488 | 37.750000 | 10   | 43.083  | 5.3333   | Top1mt                                         |
| chr4      | 1.31E+08  | 1.31E+08  | 0.004549  | 61.08333  | 10   | 65      | 3.9167   |                                                |
| chr13     | 92215511  | 92215909  | 0.0046666 | 43.541667 | 12   | 44.375  | 0.83333  | Msh3                                           |
| chr13     | 119488292 | 119488399 | 0.0054923 | 24.116929 | 35   | 58.708  | 34.591   | 3110070M22Rik & Tmem267                        |
| chr8      | 109575826 | 109575947 | 0.0062583 | 35.000000 | 15   | 47.889  | 12.889   | Hp                                             |
| chr7      | 93347316  | 93347631  | 0.006505  | 46.00397  | 20   | 77.048  | 31.044   |                                                |
| chr16     | 23966102  | 23966225  | 0.006893  | 14.90873  | 10   | 19.909  | 5        | Bcl6                                           |
| chr18     | 38197779  | 38197906  | 0.0068931 | 19.941710 | 19   | 22.05   | 2.1084   | Pcdh1                                          |
| chr11     | 78839697  | 78839803  | 0.0068931 | 21.427300 | 12   | 26.636  | 5.2083   | Lym9                                           |
| chr8      | 1.02E+08  | 1.02E+08  | 0.006893  | 22.39796  | 14   | 27.16   | 4.7619   |                                                |
| chr2      | 75049878  | 75050061  | 0.006893  | 28.07143  | 10   | 28.905  | 0.8333   |                                                |
| chr1      | 1.58E+08  | 1.58E+08  | 0.006893  | 30.5      | 10   | 31.75   | 1.25     |                                                |
| chr4      | 109848632 | 109848860 | 0.0068931 | 32.374861 | 10   | 33.625  | 1.25     | Faf1                                           |
| chr18     | 78755354  | 78755448  | 0.0068931 | 32.896825 | 21   | 38.056  | 5.1587   | Setbp1                                         |
| chr10     | 80381665  | 80381712  | 0.0068931 | 33.482143 | 10   | 34.732  | 1.25     | Mex3d                                          |
| chr19     | 31723554  | 31723787  | 0.0068931 | 35.583333 | 10   | 48.083  | 12.5     | Prkg1                                          |
| chr9      | 114404639 | 114404836 | 0.0068931 | 36.246032 | 10   | 38.508  | 2.2619   | Tmppe & Glb1                                   |

|       |           |           |           |           |    |        |         |                                         |
|-------|-----------|-----------|-----------|-----------|----|--------|---------|-----------------------------------------|
| chr7  | 80345678  | 80345782  | 0.006893  | 37.1131   | 10 | 38.113 | 1       | Hddc3 & Gm18310                         |
| chr17 | 56776922  | 56777029  | 0.0068931 | 37.750000 | 10 | 39.583 | 1.8333  | Rfx2                                    |
| chr1  | 52045752  | 52046014  | 0.0068931 | 45.833333 | 10 | 49.167 | 3.3333  | Stat4                                   |
| chr13 | 53157090  | 53157254  | 0.006893  | 46.546    | 10 | 53.897 | 7.3512  | Ror2                                    |
| chr17 | 29211475  | 29211756  | 0.006893  | 48.01984  | 10 | 49.448 | 1.4286  | Cpne5                                   |
| chr6  | 83402812  | 83402975  | 0.0068931 | 51.797619 | 10 | 53.464 | 1.6667  | Tet3                                    |
| chr4  | 43581458  | 43581549  | 0.006893  | 57.18865  | 13 | 66.163 | 8.9744  | Rgp1                                    |
| chr16 | 15279759  | 15279840  | 0.006893  | 58.75     | 10 | 71.25  | 12.5    |                                         |
| chr6  | 22436245  | 22436299  | 0.006893  | 66.34615  | 13 | 85.577 | 19.231  |                                         |
| chr4  | 65613384  | 65613620  | 0.007997  | 18.773313 | 25 | 21.931 | 3.1579  | Trim32 & Astn2                          |
| chr1  | 87125674  | 87125786  | 0.010148  | 29.583333 | 14 | 37.44  | 7.8571  | Akp3                                    |
| chrY  | 90744457  | 90744578  | 0.010311  | 23.90796  | 24 | 59.257 | 35.349  |                                         |
| chr12 | 112174161 | 112174294 | 0.010423  | 23.163306 | 19 | 25.686 | 2.5231  | Kif26a                                  |
| chr16 | 20179545  | 20179834  | 0.011374  | 29.479167 | 16 | 30.521 | 1.0417  | Yeats2                                  |
| chr9  | 99794481  | 99794706  | 0.012128  | 45.02604  | 16 | 63.073 | 18.047  |                                         |
| chr9  | 66220574  | 66220704  | 0.012468  | 14.886905 | 10 | 16.137 | 1.25    | Dapk2                                   |
| chr17 | 6494241   | 6494302   | 0.012468  | 31.14484  | 10 | 55.524 | 24.379  |                                         |
| chr19 | 11026078  | 11026391  | 0.012468  | 32.87698  | 10 | 37.083 | 4.2063  |                                         |
| chr6  | 112605796 | 112606180 | 0.012468  | 47.083333 | 10 | 51.083 | 4       | Gm5578                                  |
| chr1  | 1.13E+08  | 1.13E+08  | 0.012468  | 50.39683  | 12 | 68.056 | 17.659  |                                         |
| chr7  | 125571668 | 125572149 | 0.012547  | 33.897516 | 23 | 34.933 | 1.0352  | Gm44876 & interleukin 4 receptor, alpha |
| chr12 | 8447650   | 8448054   | 0.012832  | 25.75926  | 15 | 27.148 | 1.3889  |                                         |
| chr17 | 91088374  | 91088412  | 0.013204  | 14.758334 | 15 | 15.061 | 0.30303 | Gm47307 & neurexin I                    |
| chr4  | 155289639 | 155289802 | 0.013236  | 12.821549 | 15 | 23.933 | 11.111  | Prkcz                                   |
| chr2  | 27267134  | 27267490  | 0.013678  | 21.723058 | 19 | 26.591 | 4.8684  | Vav2                                    |
| chr12 | 55395817  | 55395983  | 0.015348  | 22.418316 | 14 | 23.133 | 0.71429 | Rpl18a-ps1 & Psma6                      |
| chr15 | 85507778  | 85507870  | 0.015361  | 18.96426  | 14 | 23.993 | 5.0283  |                                         |
| chr1  | 189850702 | 189850862 | 0.015361  | 27.453529 | 14 | 31.084 | 3.631   | Ptpn14                                  |
| chr4  | 155202154 | 155202429 | 0.017053  | 10.401991 | 13 | 14.889 | 4.4872  | Ski                                     |
| chr8  | 109994674 | 109994987 | 0.017477  | 22.640223 | 13 | 27.485 | 4.8443  | Tat                                     |
| chr11 | 1.09E+08  | 1.09E+08  | 0.01792   | 9.405466  | 19 | 14.699 | 5.2935  |                                         |
| chr15 | 78673208  | 78673340  | 0.01792   | 11.05898  | 10 | 12.684 | 1.625   | Elfn2 & 1700041B01Rik                   |
| chr4  | 121092902 | 121093038 | 0.01792   | 16.547619 | 12 | 18.862 | 2.3148  | Zmpste24                                |
| chr4  | 136946158 | 136946222 | 0.01792   | 18.710982 | 19 | 24.185 | 5.4745  | Epha8                                   |
| chr12 | 1.13E+08  | 1.13E+08  | 0.01792   | 18.72189  | 12 | 22.055 | 3.3333  | Tedc1                                   |
| chr9  | 95670102  | 95670210  | 0.01792   | 18.981481 | 12 | 22.222 | 3.2407  | Pcolce2                                 |
| chrX  | 169984861 | 169985058 | 0.01792   | 19.389748 | 21 | 43.639 | 24.249  | Gm15726 & midline 1                     |
| chr8  | 1.2E+08   | 1.2E+08   | 0.01792   | 19.39153  | 12 | 20.433 | 1.0417  |                                         |
| chr10 | 69994293  | 69994592  | 0.01792   | 20.761905 | 10 | 28.262 | 7.5     | Ank3                                    |
| chr8  | 109724292 | 109724394 | 0.01792   | 21.547619 | 10 | 22.548 | 1       | Zfp821                                  |
| chr19 | 4489119   | 4489405   | 0.01792   | 24.88492  | 10 | 29.885 | 5       |                                         |
| chr3  | 66573534  | 66573632  | 0.01792   | 28.9881   | 10 | 32.917 | 3.9286  |                                         |
| chr11 | 53820906  | 53821004  | 0.01792   | 29.178241 | 12 | 31.51  | 2.3313  | Gm12216                                 |
| chr5  | 117349255 | 117349347 | 0.01792   | 29.189815 | 12 | 39.028 | 9.838   | Gm15727 & Vsig10                        |
| chr14 | 52008395  | 52008455  | 0.01792   | 29.332168 | 10 | 40.166 | 10.833  | Zfp219                                  |
| chr7  | 11829739  | 11829917  | 0.01792   | 29.41138  | 12 | 33.925 | 4.5139  |                                         |
| chr7  | 141406680 | 141406853 | 0.01792   | 29.595238 | 10 | 35.595 | 6       | Gm4535                                  |
| chr19 | 58622510  | 58622682  | 0.01792   | 30.4881   | 10 | 34.363 | 3.875   | 1810007D17Rik                           |
| chr5  | 121434210 | 121434586 | 0.01792   | 30.742424 | 10 | 35.242 | 4.5     | Naa25 & Erp29                           |
| chr9  | 79700350  | 79700458  | 0.01792   | 30.833333 | 10 | 32.083 | 1.25    | Col12a1                                 |



|       |           |           |          |           |    |        |         |                                                                                                     |
|-------|-----------|-----------|----------|-----------|----|--------|---------|-----------------------------------------------------------------------------------------------------|
| chr6  | 50308227  | 50308370  | 0.01792  | 30.931818 | 10 | 38.182 | 7.25    | Osbpl3                                                                                              |
| chr17 | 22230743  | 22230846  | 0.01792  | 32.47619  | 10 | 33.31  | 0.8333  |                                                                                                     |
| chr5  | 1.36E+08  | 1.36E+08  | 0.01792  | 33.77381  | 10 | 37.524 | 3.75    |                                                                                                     |
| chr6  | 143607450 | 143607631 | 0.01792  | 34.250000 | 10 | 35.917 | 1.6667  | 1700060C16Rik                                                                                       |
| chr3  | 38488269  | 38488530  | 0.01792  | 35.33333  | 10 | 36.583 | 1.25    |                                                                                                     |
| chr17 | 47012875  | 47013111  | 0.01792  | 35.7384   | 10 | 39.583 | 3.8449  |                                                                                                     |
| chr13 | 54999772  | 54999896  | 0.01792  | 37.116402 | 12 | 37.95  | 0.83333 | Unc5a                                                                                               |
| chr5  | 135682297 | 135682598 | 0.01792  | 38.333333 | 10 | 39.583 | 1.25    | Por                                                                                                 |
| chr12 | 1.11E+08  | 1.11E+08  | 0.01792  | 40.875    | 10 | 41.875 | 1       | Ppp2r5c                                                                                             |
| chr5  | 138093171 | 138093263 | 0.01792  | 46.773810 | 10 | 49.542 | 2.7679  | Zkscan1                                                                                             |
| chr19 | 53537404  | 53537615  | 0.01792  | 47.107143 | 10 | 53.357 | 6.25    | Dusp5                                                                                               |
| chr11 | 6242466   | 6242502   | 0.01792  | 49.666667 | 10 | 55.417 | 5.75    | Gm11401                                                                                             |
| chr12 | 58586284  | 58586371  | 0.01792  | 50        | 12 | 54.861 | 4.8611  |                                                                                                     |
| chr7  | 125792153 | 125792208 | 0.01792  | 63.750000 | 10 | 85     | 21.25   | D430042O09Rik                                                                                       |
| chr7  | 45795137  | 45795368  | 0.019567 | 32.770563 | 33 | 34.336 | 1.5657  | Lmtk3                                                                                               |
| chr2  | 5379247   | 5379355   | 0.022262 | 10.014791 | 18 | 16.703 | 6.6878  | Camk1d                                                                                              |
| chr15 | 85263282  | 85263367  | 0.022503 | 21.851852 | 18 | 26.435 | 4.5833  | Fbln1                                                                                               |
| chr5  | 24589183  | 24589326  | 0.022503 | 24.789074 | 16 | 29.061 | 4.2722  | Chpf2                                                                                               |
| chr8  | 29194170  | 29194296  | 0.023898 | 46.812835 | 13 | 57.596 | 10.783  | Unc5d                                                                                               |
| chr9  | 40371635  | 40372053  | 0.023933 | 37.852564 | 13 | 39.135 | 1.2821  | Gramd1b                                                                                             |
| chr5  | 1.14E+08  | 1.14E+08  | 0.026908 | 27.96876  | 17 | 34.132 | 6.1629  | Ung                                                                                                 |
|       |           |           |          |           |    |        |         | Gm26904 & cullin<br>9                                                                               |
| chr17 | 46540213  | 46540328  | 0.027754 | 16.133478 | 15 | 17.14  | 1.0067  |                                                                                                     |
| chr7  | 102239702 | 102239923 | 0.027754 | 20.920635 | 15 | 29.524 | 8.6032  | Rhog                                                                                                |
| chr7  | 44462054  | 44462131  | 0.031941 | 12.746337 | 10 | 13.964 | 1.2179  | Lrrc4b                                                                                              |
| chr17 | 35682322  | 35682497  | 0.031941 | 15.154585 | 24 | 20.746 | 5.5913  | Ddr1                                                                                                |
| chr13 | 119472048 | 119472667 | 0.031941 | 18.069728 | 14 | 18.963 | 0.89286 | 4833420G17Rik                                                                                       |
| chr1  | 1.33E+08  | 1.33E+08  | 0.031941 | 18.2408   | 10 | 25.741 | 7.5     |                                                                                                     |
| chr16 | 20525922  | 20525961  | 0.031941 | 26.854798 | 10 | 31     | 4.1452  | Dvl3                                                                                                |
| chr11 | 64094399  | 64094555  | 0.031941 | 30.83333  | 10 | 33.5   | 2.6667  |                                                                                                     |
| chr2  | 118615469 | 118615570 | 0.031941 | 30.935374 | 14 | 35.06  | 4.1241  | Bub1b                                                                                               |
| chr16 | 93919225  | 93919357  | 0.031941 | 43.02083  | 20 | 45.53  | 2.5089  | Cldn14                                                                                              |
| chrX  | 15796117  | 15796264  | 0.031941 | 46.05952  | 10 | 68.054 | 21.994  |                                                                                                     |
|       |           |           |          |           |    |        |         | Ppat &<br>2310040G07Rik                                                                             |
| chr5  | 76928549  | 76928679  | 0.031941 | 51.500000 | 10 | 56.667 | 5.1667  |                                                                                                     |
| chr9  | 16606605  | 16606960  | 0.032717 | 42.14286  | 21 | 54.524 | 12.381  |                                                                                                     |
| chr6  | 147107846 | 147108092 | 0.033678 | 42.467758 | 16 | 48.703 | 6.2351  | Klhl42                                                                                              |
|       |           |           |          |           |    |        |         | Gm20721 & GNAS<br>(guanine<br>nucleotide<br>binding protein,<br>alpha stimulating)<br>complex locus |
| chr2  | 174345184 | 174345496 | 0.034138 | 30.418803 | 25 | 37.318 | 6.8992  |                                                                                                     |
| chr6  | 30637880  | 30638421  | 0.037846 | 33.68437  | 13 | 35.928 | 2.2436  |                                                                                                     |
| chr10 | 1.05E+08  | 1.05E+08  | 0.038011 | 38.46154  | 13 | 53.205 | 14.744  |                                                                                                     |
| chr3  | 95874417  | 95874634  | 0.038038 | 31.346154 | 13 | 39.423 | 8.0769  | C920021L13Rik                                                                                       |
| chr1  | 54025553  | 54025641  | 0.040779 | 34.623016 | 12 | 59.861 | 25.238  | Hecw2                                                                                               |
| chr1  | 60900875  | 60901156  | 0.04167  | 18.382353 | 17 | 21.324 | 2.9412  | Rpl18-ps1 & Ctla4                                                                                   |
| chrX  | 1.12E+08  | 1.12E+08  | 0.041981 | 62.42064  | 12 | 79.861 | 17.44   |                                                                                                     |
| chr6  | 84593710  | 84593914  | 0.042235 | 17.772817 | 12 | 20.451 | 2.6786  | Cyp26b1                                                                                             |
| chr6  | 50378499  | 50378811  | 0.042518 | 21.839451 | 12 | 23.315 | 1.4757  | Osbpl3                                                                                              |
| chr6  | 55377651  | 55378151  | 0.042953 | 10.425084 | 12 | 12.508 | 2.0833  | Ghrhr                                                                                               |
| chr7  | 121118156 | 121118713 | 0.042953 | 15.924272 | 12 | 16.445 | 0.52083 | Otoa                                                                                                |
| chr7  | 19944635  | 19944774  | 0.042953 | 18.561508 | 12 | 20.645 | 2.0833  | Igsf23                                                                                              |
| chr4  | 141952097 | 141952229 | 0.042953 | 20.157077 | 12 | 23.522 | 3.3647  | Fhad1                                                                                               |
|       |           |           |          |           |    |        |         | Gm15726 &<br>midline 1                                                                              |
| chrX  | 169980904 | 169981077 | 0.042953 | 23.779668 | 18 | 49.326 | 25.546  |                                                                                                     |
| chr9  | 94590182  | 94590361  | 0.042953 | 25.34722  | 12 | 30.208 | 4.8611  |                                                                                                     |

|       |           |           |          |           |    |        |         |                          |
|-------|-----------|-----------|----------|-----------|----|--------|---------|--------------------------|
| chr10 | 1.11E+08  | 1.11E+08  | 0.042953 | 25.35053  | 12 | 26.739 | 1.3889  |                          |
| chr13 | 38930423  | 38930587  | 0.042953 | 31.35417  | 12 | 32.917 | 1.5625  |                          |
| chr3  | 90920955  | 90921032  | 0.042953 | 32.98611  | 12 | 37.153 | 4.1667  |                          |
| chr7  | 30719053  | 30719197  | 0.042953 | 36.064815 | 12 | 36.991 | 0.92593 | Atp4a                    |
| chr15 | 78777964  | 78778182  | 0.042953 | 37.501653 | 12 | 44.329 | 6.8271  | Card10                   |
| chr10 | 1.27E+08  | 1.27E+08  | 0.042953 | 37.97619  | 12 | 40.06  | 2.0833  |                          |
| chr11 | 101336510 | 101336579 | 0.042953 | 51.736111 | 12 | 53.819 | 2.0833  | Aoc3                     |
| chr15 | 89304997  | 89305239  | 0.046229 | 19.683812 | 18 | 26.171 | 6.4868  | Sbf1                     |
| chr4  | 149929935 | 149930274 | 0.046879 | 10.305603 | 11 | 11.564 | 1.2587  | Spsb1                    |
| chr16 | 23431150  | 23431262  | 0.046879 | 12.034701 | 10 | 13.518 | 1.4835  | Rtp1                     |
| chr6  | 82728109  | 82728445  | 0.046879 | 12.87915  | 10 | 17.212 | 4.3333  | Hk2                      |
| chr1  | 89145604  | 89145790  | 0.046879 | 14.101190 | 10 | 15.768 | 1.6667  | Sh3bp4                   |
| chr15 | 12926095  | 12926158  | 0.046879 | 16.76786  | 10 | 17.601 | 0.8333  | Drosha                   |
| chr1  | 87719523  | 87719644  | 0.046879 | 17.178571 | 10 | 18.429 | 1.25    | Inpp5d                   |
| chr10 | 56504724  | 56504776  | 0.046879 | 17.47732  | 14 | 27.299 | 9.8214  |                          |
| chr4  | 141051080 | 141051118 | 0.046879 | 18.011905 | 10 | 20.44  | 2.4286  | Crocc                    |
| chr7  | 46614365  | 46614545  | 0.046879 | 18.273810 | 10 | 21.607 | 3.3333  | Sergef                   |
| chr10 | 43510957  | 43511129  | 0.046879 | 18.5464   | 10 | 19.546 | 1       | Bend3                    |
| chr8  | 121558343 | 121558601 | 0.046879 | 18.655247 | 10 | 21.084 | 2.4286  | Fbxo31 & Gm20388         |
| chr1  | 36533053  | 36533316  | 0.046879 | 20.934524 | 10 | 25.935 | 5       | Ankrd23 & Gm42417        |
| chr10 | 61229676  | 61229770  | 0.046879 | 21.729978 | 10 | 27.333 | 5.6034  | Adamts14                 |
| chr15 | 8722410   | 8722766   | 0.046879 | 23.38095  | 10 | 25.762 | 2.381   |                          |
| chr13 | 73494642  | 73495139  | 0.046879 | 23.461039 | 10 | 25.128 | 1.6667  | Lpcat1                   |
| chrY  | 90741280  | 90741326  | 0.046879 | 25.06533  | 14 | 76.799 | 51.734  |                          |
| chr2  | 76736464  | 76736529  | 0.046879 | 25.521825 | 10 | 30.522 | 5       | Gm13938 & titin          |
| chr8  | 3635654   | 3635730   | 0.046879 | 26.04167  | 10 | 29.345 | 3.3036  | Stxbp2                   |
| chr8  | 15039641  | 15039767  | 0.046879 | 27.22931  | 14 | 35.843 | 8.6139  |                          |
| chr2  | 31952347  | 31952650  | 0.046879 | 27.924242 | 10 | 33     | 5.0758  | Aif1l                    |
| chr11 | 119997003 | 119997143 | 0.046879 | 28.422619 | 10 | 30.089 | 1.6667  | Baiap2                   |
| chr3  | 91335121  | 91335348  | 0.046879 | 29.7803   | 10 | 32.28  | 2.5     |                          |
| chr14 | 58893566  | 58893636  | 0.046879 | 30.380952 | 10 | 38     | 7.619   | Rpl13-ps3                |
| chr5  | 1.06E+08  | 1.06E+08  | 0.046879 | 32.3682   | 14 | 33.559 | 1.1905  |                          |
| chr13 | 52508062  | 52508264  | 0.046879 | 33.596781 | 18 | 38.662 | 5.065   | Diras2                   |
| chrX  | 92120578  | 92120808  | 0.046879 | 33.781746 | 10 | 35.448 | 1.6667  | Mageb18                  |
| chr1  | 189862943 | 189863082 | 0.046879 | 35.750000 | 10 | 37.75  | 2       | Ptpn14                   |
| chr17 | 82959412  | 82959607  | 0.046879 | 35.79167  | 10 | 39.792 | 4       |                          |
| chr7  | 26283902  | 26284024  | 0.046879 | 37.19183  | 10 | 52.608 | 15.417  |                          |
| chr7  | 46267455  | 46267595  | 0.046879 | 37.293651 | 10 | 41.27  | 3.9762  | Otog                     |
| chr2  | 1.54E+08  | 1.54E+08  | 0.046879 | 37.70833  | 10 | 39.167 | 1.4583  | Dnmt3b                   |
| chr10 | 44140858  | 44140940  | 0.046879 | 38.517857 | 10 | 53.304 | 14.786  | Crybg1                   |
| chr7  | 1.13E+08  | 1.13E+08  | 0.046879 | 39.17857  | 10 | 53.75  | 14.571  |                          |
| chr10 | 116788872 | 116788996 | 0.046879 | 39.880952 | 11 | 58.333 | 18.452  | Myrf1                    |
| chr17 | 28837448  | 28837495  | 0.046879 | 40.333333 | 10 | 42.833 | 2.5     | Brpf3                    |
| chr1  | 131181173 | 131181403 | 0.046879 | 41.411565 | 14 | 44.643 | 3.2313  | Eif2d & Rassf5           |
| chr2  | 60979404  | 60979812  | 0.046879 | 44.91667  | 10 | 49.917 | 5       |                          |
| chr2  | 118123481 | 118123850 | 0.046879 | 47.166667 | 10 | 49.667 | 2.5     | Gm29233 & thrombospondin |
| chr6  | 25988593  | 25988948  | 0.046879 | 50.42411  | 16 | 73.914 | 23.49   |                          |
| chr10 | 19985422  | 19985629  | 0.046879 | 56.000000 | 10 | 67.5   | 11.5    | Map3k5                   |
| chr12 | 9805777   | 9805928   | 0.046879 | 60        | 10 | 67.5   | 7.5     |                          |

Identified 63 hyper-DMRs between ND and HFD fetal oocyte at E18.5.

| dmr_chrom | dmr_start | dmr_end   | qval      | diff      | cpgs | mean_ND | mean_HFD | genes_name            |
|-----------|-----------|-----------|-----------|-----------|------|---------|----------|-----------------------|
| chr5      | 112307800 | 112307949 | 4.2391e-0 | -24.05856 | 31   | 0.5914  | 24.65    | Tpst2                 |
| chr4      | 149898145 | 149898456 | 1.6005e-0 | -45.52404 | 17   | 0.3268  | 45.851   | Spsb1                 |
| chr2      | 30256021  | 30256383  | 3.4139e-0 | -22.53607 | 25   | 1.8889  | 24.425   | Lrrc8a &              |
| chr15     | 81783006  | 81783309  | 4.1586e-0 | -36.02460 | 23   | 2.1014  | 38.126   | Zc3h7b                |
| chr5      | 112333032 | 112333199 | 0.0004092 | -49.37376 | 16   | 4.5176  | 53.891   | Tfip11                |
| chr13     | 56533911  | 56534329  | 0.0004092 | -35.77740 | 14   | 0.5102  | 36.288   | Fbxl21                |
| chr13     | 47158722  | 47158855  | 0.0006533 | -44.95879 | 13   | 0.64103 | 45.6     | Rnf144b               |
| chr16     | 93754972  | 93755511  | 0.0006649 | -18.48785 | 18   | 0.70547 | 19.193   | Dop1b                 |
| chr12     | 14721507  | 14722069  | 0.002375  | -43.4804  | 17   | 6.8627  | 50.343   |                       |
| chrX      | 140600455 | 140600574 | 0.0025446 | -34.87484 | 13   | 0.64103 | 35.516   | Tsc22d3               |
| chr11     | 35708004  | 35708177  | 0.004994  | -23.46088 | 28   | 9.8214  | 33.282   | Slit3                 |
| chr5      | 8043075   | 8043153   | 0.0050184 | -86.75000 | 10   | 3.25    | 90       | Gm15731               |
| chr13     | 38941614  | 38941639  | 0.0050184 | -71.66666 | 10   | 2.5     | 74.167   | Slc35b3               |
| chr5      | 114069631 | 114069714 | 0.0050184 | -50.58333 | 10   | 9.3333  | 59.917   | Usp30 & Svop          |
| chr17     | 25718779  | 25719804  | 0.0051199 | -41.08098 | 27   | 3.5384  | 44.619   | Gng13 & Chtf18        |
| chr1      | 36103801  | 36104108  | 0.0053939 | -40.92460 | 30   | 0.51852 | 41.443   | Hs6st1                |
| chr4      | 107040986 | 107041193 | 0.0059865 | -60.76388 | 12   | 4.1667  | 64.931   | Ssbp3                 |
| chr12     | 66284270  | 66284360  | 0.0059865 | -60.69444 | 12   | 1.4583  | 62.153   | Rpl10l                |
| chr5      | 63924533  | 63924957  | 0.0059865 | -25.96813 | 15   | 1.1111  | 27.079   | Gm15819 & RELT-like 1 |
| chr15     | 103248824 | 103248939 | 0.0088244 | -41.47875 | 17   | 0.3268  | 41.806   | Nfe2                  |
| chr10     | 76603682  | 76603845  | 0.0090343 | -30.20220 | 10   | 2.1212  | 32.323   | Col6a2                |
| chr6      | 143221779 | 143222033 | 0.0098505 | -59.82142 | 12   | 0.59524 | 60.417   | Etnk1                 |
| chr15     | 78940164  | 78940594  | 0.011702  | -29.42734 | 23   | 0.36232 | 29.79    | Nol12                 |
| chr5      | 140718105 | 140718398 | 0.012013  | -15.97332 | 18   | 2.3644  | 18.338   | Brat1                 |
| chr8      | 75097028  | 75097544  | 0.013966  | -29.98366 | 17   | 0.98039 | 30.964   | Hmox1                 |
| chr11     | 113562688 | 113562783 | 0.01551   | -54.88888 | 10   | 1.25    | 56.139   | Slc39a11              |
| chr5      | 105866599 | 105866747 | 0.01551   | -51.83333 | 10   | 2.5     | 54.333   | Gm43818               |
| chr8      | 94346116  | 94346189  | 0.01551   | -50.42857 | 10   | 1.6667  | 52.095   | Slc12a3               |
| chr7      | 45047017  | 45047144  | 0.01551   | -45.64285 | 10   | 1.25    | 46.893   | Prr12                 |
| chr17     | 66377909  | 66377968  | 0.01551   | -45.61904 | 10   | 2.381   | 48       | Mtcl1                 |
| chr17     | 35670065  | 35670347  | 0.01551   | -30.86904 | 15   | 0.66667 | 31.536   | Gtf2h4                |
| chr12     | 71318609  | 71318774  | 0.01551   | -20.32936 | 15   | 1.7262  | 22.056   | Dact1 & 4930474H06Rik |
| chr19     | 53843093  | 53843558  | 0.01551   | -18.06842 | 35   | 1.958   | 20.026   | Rbm20                 |
| chr16     | 34243242  | 34243833  | 0.016545  | -28.30357 | 14   | 0.44643 | 28.75    | Kalrn                 |
| chr11     | 81397581  | 81397614  | 0.016763  | -51.73611 | 12   | 16.667  | 68.403   | 4930527B05Rik & Asic2 |
| chr7      | 105384224 | 105384347 | 0.016763  | -38.58974 | 13   | 1.2821  | 39.872   | Fam160a2              |
| chr2      | 4549247   | 4549555   | 0.016763  | -22.99007 | 20   | 1.131   | 24.121   | Frmd4a                |
| chr5      | 125427324 | 125427717 | 0.021184  | -28.21180 | 16   | 2.6228  | 30.835   | Dhx37                 |
| chr17     | 46726219  | 46726422  | 0.025446  | -16.46935 | 18   | 0.55556 | 17.025   | Gnmt & Gm26904        |
| chr7      | 118434157 | 118434417 | 0.027301  | -27.47549 | 17   | 2.6961  | 30.172   | Syt17                 |
| chr5      | 38398677  | 38398694  | 0.028563  | -72.91666 | 10   | 15.833  | 88.75    | Slc2a9                |
| chr5      | 137300341 | 137300457 | 0.028563  | -51.64881 | 10   | 1.4583  | 53.107   | Srrt                  |
| chr15     | 76186395  | 76186859  | 0.042104  | -37.38888 | 15   | 1.9444  | 39.333   | Plec                  |
| chr9      | 110386909 | 110387074 | 0.0427    | -21.63359 | 15   | 0.55556 | 22.189   | Ptpn23                |
| chr7      | 4856711   | 4856986   | 0.048657  | -68.05555 | 12   | 2.0833  | 70.139   | Isoc2b                |
| chr5      | 1.34E+08  | 1.34E+08  | 0.048657  | -61.0595  | 10   | 0.8333  | 61.893   |                       |
| chr17     | 64145602  | 64145787  | 0.048657  | -49.8333  | 10   | 2.5     | 52.333   |                       |
| chr2      | 70902957  | 70903421  | 0.048657  | -46.6987  | 13   | 0.4808  | 47.179   |                       |
| chr11     | 65187502  | 65187579  | 0.048657  | -44.70072 | 12   | 9.1187  | 53.819   | Myocd                 |
| chr15     | 59024025  | 59024212  | 0.048657  | -40.60317 | 10   | 0.83333 | 41.437   | Mtss1                 |
| chr10     | 80382279  | 80382379  | 0.048657  | -37.45518 | 10   | 1.25    | 38.705   | Mex3d & Gm22721       |

|       |           |           |          |           |    |         |        |          |
|-------|-----------|-----------|----------|-----------|----|---------|--------|----------|
| chr6  | 115865784 | 115865914 | 0.048657 | -36.40664 | 19 | 1.5789  | 37.986 | Ift122   |
| chr9  | 120174289 | 120174336 | 0.048657 | -35.00000 | 10 | 5       | 40     | Mobp     |
| chr11 | 69345522  | 69345583  | 0.048657 | -32.98992 | 12 | 2.4267  | 35.417 | Chd3     |
| chr11 | 96550154  | 96550651  | 0.048657 | -32.70833 | 12 | 1.3889  | 34.097 | Skap1    |
| chr15 | 77796103  | 77796323  | 0.048657 | -31.72805 | 10 | 1.25    | 32.978 | Myh9     |
| chr11 | 116221536 | 116221663 | 0.048657 | -31.25000 | 12 | 0.83333 | 32.083 | Evpl     |
| chr11 | 77843125  | 77843230  | 0.048657 | -27.67857 | 10 | 0.71429 | 28.393 | Myo18a   |
| chr2  | 32563494  | 32563686  | 0.048657 | -27.01326 | 13 | 2.8846  | 29.898 | Fam102a  |
| chr2  | 85058713  | 85058808  | 0.048657 | -26.18668 | 10 | 0.625   | 26.812 | Tnks1bp1 |
| chr18 | 61524370  | 61524841  | 0.048657 | -23.95502 | 12 | 1.3889  | 25.344 | Arhgef37 |
| chr19 | 41086236  | 41086392  | 0.048657 | -21.70634 | 10 | 0.83333 | 22.54  | Tll2     |
| chr7  | 12061327  | 12061443  | 0.048962 | -54.3074  | 11 | 36.223  | 90.53  |          |

**Identified 28 hypo-DMRs between ND and HFD fetal oocyte at E18.5.**

| dmr_chrom | dmr_start | dmr_end   | qval      | diff      | cpgs | mean_ND | mean_HFD | genes_name                                                                                                             |
|-----------|-----------|-----------|-----------|-----------|------|---------|----------|------------------------------------------------------------------------------------------------------------------------|
| chr17     | 39844829  | 39845149  | 1.6207e-1 | 11.167016 | 78   | 22.732  | 11.565   | Gm26917                                                                                                                |
| chr17     | 39845726  | 39845981  | 3.6753e-0 | 10.793253 | 73   | 19.706  | 8.9125   | Gm26917                                                                                                                |
| chrM      | 229       | 2281      | 8.2622e-0 | 26.735958 | 87   | 62.799  | 36.063   | mt-Rnr1 & mt-Tv & mt-Rnr2                                                                                              |
| chrM      | 2408      | 4094      | 1.6748e-0 | 20.043559 | 86   | 62.255  | 42.211   | mt-Rnr2 & mt-Tl1 & mt-Nd1 & mt-Ti & mt-Tq & mt-Tm & mt-Nd2                                                             |
| chr17     | 39844152  | 39844298  | 0.0005622 | 12.065972 | 37   | 18.949  | 6.8831   | Gm26917                                                                                                                |
| chr17     | 39848445  | 39848622  | 0.0023525 | 7.479594  | 56   | 13.822  | 6.3429   | CT010467.1 & Gm42418                                                                                                   |
| chr11     | 102153366 | 102153458 | 0.0029146 | 42.595238 | 10   | 52.012  | 9.4167   | Tmem101                                                                                                                |
| chr17     | 39845481  | 39845627  | 0.0039733 | 5.580028  | 44   | 15.216  | 9.6359   | Gm26917                                                                                                                |
| chr5      | 73552784  | 73553200  | 0.0048859 | 48.058608 | 13   | 56.52   | 8.4615   | Dcun1d4                                                                                                                |
| chr17     | 39843647  | 39843916  | 0.004994  | 5.144823  | 38   | 13.729  | 8.5846   | Gm26917                                                                                                                |
| chr17     | 12943156  | 12943398  | 0.0050184 | 35.583333 | 10   | 37.25   | 1.6667   | Acat2                                                                                                                  |
| chr13     | 55672161  | 55672219  | 0.0050184 | 66.750000 | 10   | 69.25   | 2.5      | Ddx46                                                                                                                  |
| chr1      | 1.32E+08  | 1.32E+08  | 0.005987  | 29.67442  | 14   | 30.567  | 0.8929   |                                                                                                                        |
| chrM      | 5339      | 5888      | 0.0086977 | 30.542879 | 17   | 55.974  | 25.431   | mt-Co1                                                                                                                 |
| chrM      | 5902      | 6114      | 0.0090343 | 35.745277 | 10   | 62.734  | 26.989   | mt-Co1                                                                                                                 |
| chr14     | 1.14E+08  | 1.14E+08  | 0.01372   | 30.62325  | 17   | 32.584  | 1.9608   |                                                                                                                        |
| chrX      | 123103476 | 123103643 | 0.01551   | 17.704425 | 15   | 21.593  | 3.8889   | Cldn34c1                                                                                                               |
| chr3      | 8805733   | 8805874   | 0.01551   | 50.148810 | 10   | 55.149  | 5        | Mrps28                                                                                                                 |
| chr16     | 93690404  | 93690637  | 0.016763  | 23.625992 | 12   | 25.293  | 1.6667   | Cbr3                                                                                                                   |
| chr18     | 37006784  | 37006932  | 0.016763  | 25.937500 | 12   | 27.326  | 1.3889   | Pcdha1 & Pcdha2 & Pcdha3 & Pcdha4 & Pcdha5 & Pcdha6 & Pcdha7 & Pcdha8 & Pcdha9 & Pcdha11 & Gm42416 & Gm37013 & Gm37388 |
| chrM      | 12086     | 13345     | 0.020929  | 16.766969 | 60   | 72.376  | 55.609   | mt-Nd5                                                                                                                 |
| chr17     | 39848641  | 39848762  | 0.022804  | 10.631959 | 33   | 18.81   | 8.1785   | CT010467.1 & Gm42418                                                                                                   |
| chr16     | 57391451  | 57391592  | 0.025446  | 7.029938  | 36   | 15.731  | 8.7014   | Cmss1 & Filip1l                                                                                                        |
| chr8      | 122497547 | 122497874 | 0.027301  | 26.907890 | 22   | 29.815  | 2.9072   | Piezo1 & Gm20388                                                                                                       |
| chr10     | 13892797  | 13893677  | 0.031795  | 20.92648  | 29   | 33.275  | 12.348   |                                                                                                                        |
| chrM      | 6130      | 6432      | 0.033356  | 27.171379 | 16   | 58.087  | 30.915   | mt-Co1                                                                                                                 |
| chr15     | 97758852  | 97758974  | 0.048657  | 20.079365 | 12   | 21.468  | 1.3889   | Rapgef3                                                                                                                |
| chr10     | 112425216 | 112425348 | 0.048657  | 39.849206 | 10   | 40.349  | 0.5      | Kcnc2                                                                                                                  |

**Table S5**

Primer sequences of genes for Bisulfite sequencing

F1: outer forward; R1: outer reverse; F2: inner forward; R2: inner reverse

| Gene          | Primer sequence                    | Size ( bp ) |
|---------------|------------------------------------|-------------|
| <i>Brat1</i>  | F1: 5'–GTGTTATTTTTTTGGTTGGGTG–3'   | 455         |
|               | R1: 5'–ACCAACTCCAAACCCTACA–3'      |             |
| <i>Brat1</i>  | F2: 5'–TGGTAGGAGTTTGAGGTAGTTG–3'   | 425         |
|               | R2: 5'–ACCAACTCCAAACCCTACA–3'      |             |
| <i>Sohlh2</i> | F1: 5'–TGGAGAAAGTAAAATTGTTGGT–3'   | 327         |
|               | R1: 5'–CCCCAAACCCTTAATAAAAC–3'     |             |
| <i>Sohlh2</i> | F2: 5'–TGGAGAAAGTAAAATTGTTGGT–3'   | 288         |
|               | R2: 5'–TCCCTCCAATCCTACCTAC–3'      |             |
| <i>Kmt2d</i>  | F1: 5' –ATAGTTGAGAAGGAGGAATTTA–3'  | 353         |
|               | R1: 5'– ACAATTTATACTCCAAATCA–3'    |             |
| <i>Kmt2d</i>  | F2: 5' –GAGAAGGAGGAATTTAGGTTAGT–3' | 251         |
|               | R2: 5'–ACACTCCAATCATCTCAATAC–3'    |             |
| <i>Ddx4</i>   | F1: 5'–AGATAGGATGTTGAGGTTTTGG–3'   | 370         |
|               | R1: 5'–TCCTCTACCTTCCAAACCTAAC–3'   |             |
| <i>Ddx4</i>   | F2: 5' –AATTGTTTTGAGTYGGGTTT–3'    | 326         |
|               | R2: 5'–TCTACCTTCCAAACCTAACCC–3'    |             |
| <i>Mest</i>   | F1: 5'–GGTATTAATATATGGGAAGGTT–3'   | 366         |
|               | R1: 5'–CAAAAACAACAACAACA–3'        |             |
| <i>Mest</i>   | F2: 5'–TTTTTTTATTAGAATTTGGGGT–3'   | 345         |
|               | R2: 5'–CAAAAACAACAACAACA–3'        |             |
| <i>Igf2r</i>  | F1: 5'–GGTTTTAGGTTGGAGTAAGAGG–3'   | 344         |
|               | R1: 5'–TAAAACCCTTCCCTCCTATAAA–3'   |             |
| <i>Igf2r</i>  | F2: 5'–GAGTTAAAGTTTGGTGAGGTTG–3'   | 320         |
|               | R2: 5'–TAAAACCCTTCCCTCCTATAAA–3'   |             |
| <i>Kmt2b</i>  | F1: 5'–GGGGGTTGGTTGTTATTAGTTA–3'   | 299         |
|               | R1: 5'–AATTCCCTTACTAAAACCTCCCC–3'  |             |
| <i>Kmt2b</i>  | F2: 5'–GGTGTGAAGGAAGAGAGTTTT–3'    | 272         |
|               | R2: 5'–AATTCCCTTACTAAAACCTCCCC–3'  |             |
| <i>Usp30</i>  | F1: 5'–TGGTTTTTTTATTTGAATGTGT–3'   | 352         |
|               | R1: 5'–CCAAACCTAATAACCTAAATTCA–3'  |             |

---

F2: 5'-AGGTTTTTTTGTTGATGTGTTTT-3'

313

R2: 5'-CCAAACCTAATAACCTAAATTCAA-3'

---
